# Supplementary material for: Label-Free Quantitative Proteome Analysis Reveals the Underlying Mechanisms of Grain Nuclear Proteins Involved in Wheat Water-Deficit Response
Source: Front Plant Sci. 2021 Oct 25;12:748487. doi: 10.3389/fpls.2021.748487 (PMC8572964; doi:10.3389/fpls.2021.748487)
Supplement: Supplementary Table 1 — The list of peptides identified from extracted nucleus of wheat developing grains under water deficit. [file Data_Sheet_1.xlsx]

## Sheet: Table S1
Table S1. The list of peptides identified from extracted nucleus of wheat developing grains.
ID	Sequence	Length	Protein accession	Protein description	Experiment	Charge	m/z	Mass Error [ppm]	PEP	MS/MS Count	Score	Intensity
0	AAAAAAAAAR	10	A0A3B6RN71	Epimerase domain-containing protein OS=Triticum aestivum OX=4565 PE=4 SV=1	0W_1	2	407.73	-2.1097	0.0051492	1	66.27	5236800
1	AAAAAAAAAR	10	A0A3B6RN71	Epimerase domain-containing protein OS=Triticum aestivum OX=4565 PE=4 SV=1	2W_2	2	407.73	-0.47952	6.0875e-05	1	96.624	6853700
2	AAAAAAAAAR	10	A0A3B6RN71	Epimerase domain-containing protein OS=Triticum aestivum OX=4565 PE=4 SV=1	0W_3	2	407.73	-1.5438	0.00012678	1	83.948	7408300
3	AAAAAAAAAR	10	A0A3B6RN71	Epimerase domain-containing protein OS=Triticum aestivum OX=4565 PE=4 SV=1	2W_3	2	407.73	-1.005	6.29e-05	1	95.502	7570000
4	AAAAAAAAAR	10	A0A3B6RN71	Epimerase domain-containing protein OS=Triticum aestivum OX=4565 PE=4 SV=1	2W_1	2	407.73	-0.52355	NaN	0		7702900
5	AAAAAAAAAR	10	A0A3B6RN71	Epimerase domain-containing protein OS=Triticum aestivum OX=4565 PE=4 SV=1	0W_2	2	407.73	-2.4681	NaN	0		6356100
6	AAAAAAAAGESAGELLR	17	A0A3B6H213	AB hydrolase-1 domain-containing protein OS=Triticum aestivum OX=4565 PE=4 SV=1	0W_1	2	771.4	0.24378	6.2876e-05	1	57.288	1708900
7	AAAAAAAAGESAGELLR	17	A0A3B6H213	AB hydrolase-1 domain-containing protein OS=Triticum aestivum OX=4565 PE=4 SV=1	0W_2	2	771.4	0.32096	0.0016639	1	42.947	1525500
8	AAAAAAAAGESAGELLR	17	A0A3B6H213	AB hydrolase-1 domain-containing protein OS=Triticum aestivum OX=4565 PE=4 SV=1	0W_3	2	771.4	0.2283	7.1565e-05	1	56.514	1552600
9	AAAAAAAAGESAGELLR	17	A0A3B6H213	AB hydrolase-1 domain-containing protein OS=Triticum aestivum OX=4565 PE=4 SV=1	2W_1	2	771.4	0.4198	NaN	0		6725300
10	AAAAAAAAGESAGELLR	17	A0A3B6H213	AB hydrolase-1 domain-containing protein OS=Triticum aestivum OX=4565 PE=4 SV=1	2W_2	2	771.4	0.72075	NaN	0		7610800
11	AAAAAAAAGESAGELLR	17	A0A3B6H213	AB hydrolase-1 domain-containing protein OS=Triticum aestivum OX=4565 PE=4 SV=1	2W_3	2	771.4	0.98355	NaN	0		6376400
12	AAAAAAAEPVSVEDLFAALHR	21	A0A3B6EMU0	Signal recognition particle subunit SRP72 OS=Triticum aestivum OX=4565 PE=3 SV=1	2W_1	3	694.032		1.3924e-76	1	141.13	0
13	AAAAAAAEPVSVEDLFAALHR	21	A0A3B6EMU0	Signal recognition particle subunit SRP72 OS=Triticum aestivum OX=4565 PE=3 SV=1	0W_2	3	694.032		1.2079e-13	1	72.359	0
14	AAAAAAAEPVSVEDLFAALHR	21	A0A3B6EMU0	Signal recognition particle subunit SRP72 OS=Triticum aestivum OX=4565 PE=3 SV=1	2W_2	3	694.032	0.12231	5.7569e-13	1	95.205	21454000
15	AAAAAAAEPVSVEDLFAALHR	21	A0A3B6EMU0	Signal recognition particle subunit SRP72 OS=Triticum aestivum OX=4565 PE=3 SV=1	0W_3	3	694.032	0.086338	NaN	0		12449000
16	AAAAAAAEPVSVEDLFTALHR	21	A0A3B6H2V7	Signal recognition particle subunit SRP72 OS=Triticum aestivum OX=4565 PE=3 SV=1	0W_1	3	704.036	0.46379	0.00023254	1	55.453	10268000
17	AAAAAAAEPVSVEDLFTALHR	21	A0A3B6H2V7	Signal recognition particle subunit SRP72 OS=Triticum aestivum OX=4565 PE=3 SV=1	2W_1	3	704.036	0.37569	1.3474e-08	1	84.249	20520000
18	AAAAAAAEPVSVEDLFTALHR	21	A0A3B6H2V7	Signal recognition particle subunit SRP72 OS=Triticum aestivum OX=4565 PE=3 SV=1	0W_2	3	704.036	0.20729	0.00023254	1	55.453	8036100
19	AAAAAAAEPVSVEDLFTALHR	21	A0A3B6H2V7	Signal recognition particle subunit SRP72 OS=Triticum aestivum OX=4565 PE=3 SV=1	2W_2	3	704.036	0.11549	9.7507e-13	1	92.474	22638000
20	AAAAAAAEPVSVEDLFTALHR	21	A0A3B6H2V7	Signal recognition particle subunit SRP72 OS=Triticum aestivum OX=4565 PE=3 SV=1	0W_3	3	704.036	0.33774	0.00027784	1	48.616	8744200
21	AAAAAAAEPVSVEDLFTALHR	21	A0A3B6H2V7	Signal recognition particle subunit SRP72 OS=Triticum aestivum OX=4565 PE=3 SV=1	2W_3	3	704.036	0.14535	2.3421e-06	1	76.301	19560000
22	AAAAAAAQMDFSTPSKPAPTPTPR	24	A0A3B6TMB1	Origin recognition complex subunit 1 OS=Triticum aestivum OX=4565 PE=3 SV=1	0W_3	3	785.73	-1.206	0.015975	1	23.536	4380900
23	AAAAAAAQMDFSTPSKPAPTPTPR	24	A0A3B6TMB1	Origin recognition complex subunit 1 OS=Triticum aestivum OX=4565 PE=3 SV=1	0W_1	3	785.73	-0.98789	NaN	0		7669800
24	AAAAAAAQMDFSTPSKPAPTPTPR	24	A0A3B6TMB1	Origin recognition complex subunit 1 OS=Triticum aestivum OX=4565 PE=3 SV=1	2W_1	3	785.73	0.21653	NaN	0		4270800
25	AAAAAAAQMDFSTPSKPAPTPTPR	24	A0A3B6TMB1	Origin recognition complex subunit 1 OS=Triticum aestivum OX=4565 PE=3 SV=1	0W_2	3	785.73	0.16879	NaN	0		5470300
26	AAAAAAEPVSVEDLFTALHR	20	A0A3B6FTP5	Signal recognition particle subunit SRP72 OS=Triticum aestivum OX=4565 PE=3 SV=1	0W_1	3	680.357	0.40808	4.3317e-10	1	88.565	12453000
27	AAAAAAEPVSVEDLFTALHR	20	A0A3B6FTP5	Signal recognition particle subunit SRP72 OS=Triticum aestivum OX=4565 PE=3 SV=1	0W_2	3	680.357	1.0874	0.00027402	1	51.566	11942000
28	AAAAAAEPVSVEDLFTALHR	20	A0A3B6FTP5	Signal recognition particle subunit SRP72 OS=Triticum aestivum OX=4565 PE=3 SV=1	2W_2	3	680.357	0.15445	6.5711e-09	1	86.8	22089000
29	AAAAAAEPVSVEDLFTALHR	20	A0A3B6FTP5	Signal recognition particle subunit SRP72 OS=Triticum aestivum OX=4565 PE=3 SV=1	0W_3	3	680.357	-0.13671	0.0022558	1	32.797	9165300
30	AAAAAAEPVSVEDLFTALHR	20	A0A3B6FTP5	Signal recognition particle subunit SRP72 OS=Triticum aestivum OX=4565 PE=3 SV=1	2W_3	3	680.357	-0.21207	2.4332e-08	1	81.854	15936000
31	AAAAAASGATAAVESVVVVHNVAK	24	A0A3B5ZPQ9	SpoU_methylase domain-containing protein OS=Triticum aestivum OX=4565 PE=4 SV=1	2W_1	2	1103.59	1.5298	0.00016414	1	40.622	6860400
32	AAAAAASGATAAVESVVVVHNVAK	24	A0A3B5ZPQ9	SpoU_methylase domain-containing protein OS=Triticum aestivum OX=4565 PE=4 SV=1	2W_1	3	736.066	1.0245	5.7845e-05	1	55.705	18443000
33	AAAAAASGATAAVESVVVVHNVAK	24	A0A3B5ZPQ9	SpoU_methylase domain-containing protein OS=Triticum aestivum OX=4565 PE=4 SV=1	2W_2	2	1103.59	1.2897	0.00016969	1	40.137	6043000
34	AAAAAASGATAAVESVVVVHNVAK	24	A0A3B5ZPQ9	SpoU_methylase domain-containing protein OS=Triticum aestivum OX=4565 PE=4 SV=1	2W_3	3	736.066	1.0066	1.8093e-05	1	63.869	15971000
35	AAAAAASGATAAVESVVVVHNVAK	24	A0A3B5ZPQ9	SpoU_methylase domain-containing protein OS=Triticum aestivum OX=4565 PE=4 SV=1	2W_3	2	1103.59	1.2926	4.1205e-05	1	58.093	5409500
36	AAAAAASGATAAVESVVVVHNVAK	24	A0A3B5ZPQ9	SpoU_methylase domain-containing protein OS=Triticum aestivum OX=4565 PE=4 SV=1	0W_1	2	1103.59	0.39141	NaN	0		247010
37	AAAAAASGATAAVESVVVVHNVAK	24	A0A3B5ZPQ9	SpoU_methylase domain-containing protein OS=Triticum aestivum OX=4565 PE=4 SV=1	2W_2	3	736.066	1.0335	NaN	0		18774000
38	AAAAADFTQSK	11	A0A3B6EKM1	tRNA-binding domain-containing protein OS=Triticum aestivum OX=4565 PE=4 SV=1	0W_1	2	561.775	-1.719	0.0024511	1	59.198	7316100
39	AAAAADFTQSK	11	A0A3B6EKM1	tRNA-binding domain-containing protein OS=Triticum aestivum OX=4565 PE=4 SV=1	0W_3	2	561.775	-1.9361	0.0028105	1	57.175	9379900
40	AAAAADFTQSK	11	A0A3B6EKM1	tRNA-binding domain-containing protein OS=Triticum aestivum OX=4565 PE=4 SV=1	2W_1	2	561.775	-0.76872	NaN	0		9264600
41	AAAAADFTQSK	11	A0A3B6EKM1	tRNA-binding domain-containing protein OS=Triticum aestivum OX=4565 PE=4 SV=1	0W_2	2	561.775	-2.0926	NaN	0		9874700
42	AAAAADFTQSK	11	A0A3B6EKM1	tRNA-binding domain-containing protein OS=Triticum aestivum OX=4565 PE=4 SV=1	2W_2	2	561.775	-1.7013	NaN	0		11367000
43	AAAAADFTQSK	11	A0A3B6EKM1	tRNA-binding domain-containing protein OS=Triticum aestivum OX=4565 PE=4 SV=1	2W_3	2	561.775	-1.2248	NaN	0		11189000
44	AAAAAEHPPTPLSTDGIK	18	A0A3B6MZ14	Nascent polypeptide-associated complex subunit alpha, muscle-specific form-like(predicted) OS=Triticum aestivum OX=4565 PE=4 SV=1	0W_1	3	582.972	1.0263	0.00062022	1	42.059	17360000
45	AAAAAEHPPTPLSTDGIK	18	A0A3B6MZ14	Nascent polypeptide-associated complex subunit alpha, muscle-specific form-like(predicted) OS=Triticum aestivum OX=4565 PE=4 SV=1	2W_1	3	582.972	0.48486	0.0041584	1	32.858	14590000
46	AAAAAEHPPTPLSTDGIK	18	A0A3B6MZ14	Nascent polypeptide-associated complex subunit alpha, muscle-specific form-like(predicted) OS=Triticum aestivum OX=4565 PE=4 SV=1	0W_2	3	582.972	1.0923	0.0098502	1	27.714	18732000
47	AAAAAEHPPTPLSTDGIK	18	A0A3B6MZ14	Nascent polypeptide-associated complex subunit alpha, muscle-specific form-like(predicted) OS=Triticum aestivum OX=4565 PE=4 SV=1	2W_2	3	582.972	0.31628	0.0014518	1	35.304	14626000
48	AAAAAEHPPTPLSTDGIK	18	A0A3B6MZ14	Nascent polypeptide-associated complex subunit alpha, muscle-specific form-like(predicted) OS=Triticum aestivum OX=4565 PE=4 SV=1	0W_3	3	582.972	0.78723	0.05266	1	17.718	13944000
49	AAAAAEHPPTPLSTDGIK	18	A0A3B6MZ14	Nascent polypeptide-associated complex subunit alpha, muscle-specific form-like(predicted) OS=Triticum aestivum OX=4565 PE=4 SV=1	2W_3	3	582.972	0.81457	0.001196	1	37.042	15655000
50	AAAAAEHPPTPLSTDGIKR	19	A0A3B6MZ14	Nascent polypeptide-associated complex subunit alpha, muscle-specific form-like(predicted) OS=Triticum aestivum OX=4565 PE=4 SV=1	0W_1	3	635.006	0.59161	0.0043684	1	31.41	3866900
51	AAAAAEHPPTPLSTDGIKR	19	A0A3B6MZ14	Nascent polypeptide-associated complex subunit alpha, muscle-specific form-like(predicted) OS=Triticum aestivum OX=4565 PE=4 SV=1	2W_1	3	635.006	0.39242	0.00092444	1	37.157	4813700
52	AAAAAEHPPTPLSTDGIKR	19	A0A3B6MZ14	Nascent polypeptide-associated complex subunit alpha, muscle-specific form-like(predicted) OS=Triticum aestivum OX=4565 PE=4 SV=1	0W_2	3	635.006	0.5913	0.0088929	1	25.995	2384300
53	AAAAAEHPPTPLSTDGIKR	19	A0A3B6MZ14	Nascent polypeptide-associated complex subunit alpha, muscle-specific form-like(predicted) OS=Triticum aestivum OX=4565 PE=4 SV=1	0W_3	3	635.006	0.27482	0.0035694	1	32.366	2484100
54	AAAAAEHPPTPLSTDGIKR	19	A0A3B6MZ14	Nascent polypeptide-associated complex subunit alpha, muscle-specific form-like(predicted) OS=Triticum aestivum OX=4565 PE=4 SV=1	2W_3	3	635.006	0.7607	0.0047566	1	30.945	4862400
55	AAAAAEHPPTPLSTDGIKR	19	A0A3B6MZ14	Nascent polypeptide-associated complex subunit alpha, muscle-specific form-like(predicted) OS=Triticum aestivum OX=4565 PE=4 SV=1	2W_2	3	635.006	0.70776	NaN	0		6783000
56	AAAAANLAGR	10	A0A3B6LW86	Mitochondrial Rho GTPase OS=Triticum aestivum OX=4565 PE=3 SV=1	0W_1	2	464.254	0.4609	0.00060972	1	84.615	19732000
57	AAAAANLAGR	10	A0A3B6LW86	Mitochondrial Rho GTPase OS=Triticum aestivum OX=4565 PE=3 SV=1	2W_1	2	464.254	-0.26582	NaN	0		22985000
58	AAAAANLAGR	10	A0A3B6LW86	Mitochondrial Rho GTPase OS=Triticum aestivum OX=4565 PE=3 SV=1	0W_2	2	464.254	0.33169	NaN	0		13354000
59	AAAAANLAGR	10	A0A3B6LW86	Mitochondrial Rho GTPase OS=Triticum aestivum OX=4565 PE=3 SV=1	2W_2	2	464.254	-0.51439	NaN	0		29544000
60	AAAAANLAGR	10	A0A3B6LW86	Mitochondrial Rho GTPase OS=Triticum aestivum OX=4565 PE=3 SV=1	0W_3	2	464.254	-0.14354	NaN	0		29902000
61	AAAAANLAGR	10	A0A3B6LW86	Mitochondrial Rho GTPase OS=Triticum aestivum OX=4565 PE=3 SV=1	2W_3	2	464.254	0.013021	NaN	0		25971000
62	AAAAANLAGRPGVR	14	A0A3B6LW86	Mitochondrial Rho GTPase OS=Triticum aestivum OX=4565 PE=3 SV=1	0W_1	2	668.876	0.27276	0.0023309	1	56.087	38468000
63	AAAAANLAGRPGVR	14	A0A3B6LW86	Mitochondrial Rho GTPase OS=Triticum aestivum OX=4565 PE=3 SV=1	2W_1	2	668.876	0.97324	8.2588e-05	1	96.604	51913000
64	AAAAANLAGRPGVR	14	A0A3B6LW86	Mitochondrial Rho GTPase OS=Triticum aestivum OX=4565 PE=3 SV=1	0W_2	2	668.876	0.25581	0.002964	1	55.04	33430000
65	AAAAANLAGRPGVR	14	A0A3B6LW86	Mitochondrial Rho GTPase OS=Triticum aestivum OX=4565 PE=3 SV=1	2W_2	2	668.876	0.91593	1.9441e-08	1	115.33	70930000
66	AAAAANLAGRPGVR	14	A0A3B6LW86	Mitochondrial Rho GTPase OS=Triticum aestivum OX=4565 PE=3 SV=1	0W_3	2	668.876	0.24436	0.00028634	1	73.435	43604000
67	AAAAANLAGRPGVR	14	A0A3B6LW86	Mitochondrial Rho GTPase OS=Triticum aestivum OX=4565 PE=3 SV=1	2W_3	2	668.876	0.84845	0.00019631	1	81.92	57107000
68	AAAAASAEAAAITR	14	A0A3B6B5S8	Ribosomal RNA processing protein 1-like protein(predicted) OS=Triticum aestivum OX=4565 PE=4 SV=1	0W_1	2	643.839	-0.16406	0.00012721	1	68.044	7513900
69	AAAAASAEAAAITR	14	A0A3B6B5S8	Ribosomal RNA processing protein 1-like protein(predicted) OS=Triticum aestivum OX=4565 PE=4 SV=1	2W_1	2	643.839	-0.98523	5.4558e-05	1	91.812	11522000
70	AAAAASAEAAAITR	14	A0A3B6B5S8	Ribosomal RNA processing protein 1-like protein(predicted) OS=Triticum aestivum OX=4565 PE=4 SV=1	0W_2	2	643.839	-0.15796	6.7971e-05	1	85.909	8747500
71	AAAAASAEAAAITR	14	A0A3B6B5S8	Ribosomal RNA processing protein 1-like protein(predicted) OS=Triticum aestivum OX=4565 PE=4 SV=1	2W_2	2	643.839	-1.0678	6.4377e-05	1	84.753	13668000
72	AAAAASAEAAAITR	14	A0A3B6B5S8	Ribosomal RNA processing protein 1-like protein(predicted) OS=Triticum aestivum OX=4565 PE=4 SV=1	2W_3	2	643.839	-0.64212	4.7223e-05	1	92.939	13261000
73	AAAAASVGHSSK	12	A0A3B6SJC8	Structural maintenance of chromosomes protein OS=Triticum aestivum OX=4565 PE=3 SV=1	0W_1	2	549.781	0.32645	1.5093e-06	1	104.3	68944000
74	AAAAASVGHSSK	12	A0A3B6SJC8	Structural maintenance of chromosomes protein OS=Triticum aestivum OX=4565 PE=3 SV=1	0W_2	2	549.781	2.3445	1.7451e-06	1	103.44	67690000
75	AAAAASVGHSSK	12	A0A3B6SJC8	Structural maintenance of chromosomes protein OS=Triticum aestivum OX=4565 PE=3 SV=1	2W_2	2	549.781	0.63936	0.00068357	1	64.121	84627000
76	AAAAASVGHSSK	12	A0A3B6SJC8	Structural maintenance of chromosomes protein OS=Triticum aestivum OX=4565 PE=3 SV=1	0W_3	2	549.781	0.40837	3.0567e-05	1	95.162	43969000
77	AAAAASVGHSSK	12	A0A3B6SJC8	Structural maintenance of chromosomes protein OS=Triticum aestivum OX=4565 PE=3 SV=1	2W_3	2	549.781	0.85678	4.1269e-05	1	93.623	91620000
78	AAAAASVGHSSK	12	A0A3B6SJC8	Structural maintenance of chromosomes protein OS=Triticum aestivum OX=4565 PE=3 SV=1	2W_1	2	549.781	0.7634	NaN	0		65317000
79	AAAAASVGHSSR	12	A0A3B6RJM2	Structural maintenance of chromosomes protein OS=Triticum aestivum OX=4565 PE=3 SV=1	0W_1	2	563.784	0.097005	7.3172e-17	1	158.56	99691000
80	AAAAASVGHSSR	12	A0A3B6RJM2	Structural maintenance of chromosomes protein OS=Triticum aestivum OX=4565 PE=3 SV=1	2W_1	2	563.784	0.2898	2.0541e-05	1	96.604	178020000
81	AAAAASVGHSSR	12	A0A3B6RJM2	Structural maintenance of chromosomes protein OS=Triticum aestivum OX=4565 PE=3 SV=1	0W_2	2	563.784	0.092231	3.2908e-09	1	113.61	150140000
82	AAAAASVGHSSR	12	A0A3B6RJM2	Structural maintenance of chromosomes protein OS=Triticum aestivum OX=4565 PE=3 SV=1	2W_2	2	563.784	0.055902	2.0541e-05	1	96.604	239200000
83	AAAAASVGHSSR	12	A0A3B6RJM2	Structural maintenance of chromosomes protein OS=Triticum aestivum OX=4565 PE=3 SV=1	0W_3	2	563.784	-0.0031646	4.3668e-13	1	137.4	197230000
84	AAAAASVGHSSR	12	A0A3B6RJM2	Structural maintenance of chromosomes protein OS=Triticum aestivum OX=4565 PE=3 SV=1	2W_3	2	563.784	0.30846	8.5745e-07	1	106.67	218900000
85	AAAAATAQPGLDAR	14	A0A3B6KFF1	WD_REPEATS_REGION domain-containing protein OS=Triticum aestivum OX=4565 PE=4 SV=1	0W_1	2	663.344	0.72586	5.3083e-05	1	92.039	13213000
86	AAAAATAQPGLDAR	14	A0A3B6KFF1	WD_REPEATS_REGION domain-containing protein OS=Triticum aestivum OX=4565 PE=4 SV=1	2W_1	2	663.344	0.34412	1.3851e-06	1	107.65	14885000
87	AAAAATAQPGLDAR	14	A0A3B6KFF1	WD_REPEATS_REGION domain-containing protein OS=Triticum aestivum OX=4565 PE=4 SV=1	0W_2	2	663.344	0.35162	5.6029e-05	1	82.069	16223000
88	AAAAATAQPGLDAR	14	A0A3B6KFF1	WD_REPEATS_REGION domain-containing protein OS=Triticum aestivum OX=4565 PE=4 SV=1	2W_2	2	663.344	0.62686	9.1395e-14	1	128.54	17983000
89	AAAAATAQPGLDAR	14	A0A3B6KFF1	WD_REPEATS_REGION domain-containing protein OS=Triticum aestivum OX=4565 PE=4 SV=1	0W_3	2	663.344	0.22605	5.5806e-05	1	91.62	15139000
90	AAAAATAQPGLDAR	14	A0A3B6KFF1	WD_REPEATS_REGION domain-containing protein OS=Triticum aestivum OX=4565 PE=4 SV=1	2W_3	2	663.344	0.23696	3.7472e-13	1	120.84	22085000
91	AAAAEMMYLLEPDKK	15	A0A3B6EI96	Acetyltransferase 1-like(predicted) OS=Triticum aestivum OX=4565 PE=4 SV=1	0W_1	3	560.949	-0.19541	0.0014864	1	43.592	7980800
92	AAAAEMMYLLEPDKK	15	A0A3B6EI96	Acetyltransferase 1-like(predicted) OS=Triticum aestivum OX=4565 PE=4 SV=1	2W_1	3	560.949	-0.79041	0.0014864	1	43.592	12882000
93	AAAAEMMYLLEPDKK	15	A0A3B6EI96	Acetyltransferase 1-like(predicted) OS=Triticum aestivum OX=4565 PE=4 SV=1	0W_2	3	560.949	-0.33251	0.002313	1	40.983	7529800
94	AAAAEMMYLLEPDKK	15	A0A3B6EI96	Acetyltransferase 1-like(predicted) OS=Triticum aestivum OX=4565 PE=4 SV=1	2W_2	3	560.949	0.10217	0.0014864	1	43.592	12196000
95	AAAAEMMYLLEPDKK	15	A0A3B6EI96	Acetyltransferase 1-like(predicted) OS=Triticum aestivum OX=4565 PE=4 SV=1	0W_3	3	560.949	0.13287	0.0033313	1	37.77	7770500
96	AAAAEMMYLLEPDKK	15	A0A3B6EI96	Acetyltransferase 1-like(predicted) OS=Triticum aestivum OX=4565 PE=4 SV=1	2W_3	3	560.949	-0.24914	0.00045253	1	51.073	11992000
97	AAAAEVGGVVFGCAHTATGFHSHGVLAGVLGLGK	34	A0A3B6N2K8	Peptidase A1 domain-containing protein OS=Triticum aestivum OX=4565 PE=3 SV=1	2W_1	5	644.536	-0.025571	1.1245e-09	1	45.748	38091000
98	AAAAEVGGVVFGCAHTATGFHSHGVLAGVLGLGK	34	A0A3B6N2K8	Peptidase A1 domain-containing protein OS=Triticum aestivum OX=4565 PE=3 SV=1	2W_2	5	644.536	0.085038	0.013971	1	18.938	44602000
99	AAAAEVGGVVFGCAHTATGFHSHGVLAGVLGLGK	34	A0A3B6N2K8	Peptidase A1 domain-containing protein OS=Triticum aestivum OX=4565 PE=3 SV=1	2W_3	5	644.536	0.10916	0.0055605	1	22.449	43352000
100	AAAAGAAHPTYFEMIK	16	A0A1D5ULT3	H15 domain-containing protein OS=Triticum aestivum OX=4565 GN=CAMPLR22A2D_LOCUS3974 PE=3 SV=1	0W_1	2	832.909	-0.089674	3.5551e-07	1	106.66	172760000
101	AAAAGAAHPTYFEMIK	16	A0A1D5ULT3	H15 domain-containing protein OS=Triticum aestivum OX=4565 GN=CAMPLR22A2D_LOCUS3974 PE=3 SV=1	0W_1	3	555.608	-0.16276	0.0018096	1	40.211	604800000
102	AAAAGAAHPTYFEMIK	16	A0A1D5ULT3	H15 domain-containing protein OS=Triticum aestivum OX=4565 GN=CAMPLR22A2D_LOCUS3974 PE=3 SV=1	0W_1	2	832.909	-0.41133	1.0221e-05	1	92.495	83030000
103	AAAAGAAHPTYFEMIK	16	A0A1D5ULT3	H15 domain-containing protein OS=Triticum aestivum OX=4565 GN=CAMPLR22A2D_LOCUS3974 PE=3 SV=1	0W_1	3	555.608	-0.53387	0.00051581	1	45.614	969250000
104	AAAAGAAHPTYFEMIK	16	A0A1D5ULT3	H15 domain-containing protein OS=Triticum aestivum OX=4565 GN=CAMPLR22A2D_LOCUS3974 PE=3 SV=1	0W_1	2	832.909	-2.5289	0.00076563	1	47.037	164700000
105	AAAAGAAHPTYFEMIK	16	A0A1D5ULT3	H15 domain-containing protein OS=Triticum aestivum OX=4565 GN=CAMPLR22A2D_LOCUS3974 PE=3 SV=1	2W_1	3	555.608	-0.58894	2.3566e-05	1	62.69	2120000000
106	AAAAGAAHPTYFEMIK	16	A0A1D5ULT3	H15 domain-containing protein OS=Triticum aestivum OX=4565 GN=CAMPLR22A2D_LOCUS3974 PE=3 SV=1	2W_1	2	832.909	0.24814	1.3566e-09	1	111.64	383880000
107	AAAAGAAHPTYFEMIK	16	A0A1D5ULT3	H15 domain-containing protein OS=Triticum aestivum OX=4565 GN=CAMPLR22A2D_LOCUS3974 PE=3 SV=1	2W_1	2	832.909	0.010445	1.2765e-05	1	72.286	91180000
108	AAAAGAAHPTYFEMIK	16	A0A1D5ULT3	H15 domain-containing protein OS=Triticum aestivum OX=4565 GN=CAMPLR22A2D_LOCUS3974 PE=3 SV=1	2W_1	3	555.608	-0.2685	0.0003102	1	49.188	1126800000
109	AAAAGAAHPTYFEMIK	16	A0A1D5ULT3	H15 domain-containing protein OS=Triticum aestivum OX=4565 GN=CAMPLR22A2D_LOCUS3974 PE=3 SV=1	2W_1	2	832.909	-2.753	9.1271e-06	1	81.703	103250000
110	AAAAGAAHPTYFEMIK	16	A0A1D5ULT3	H15 domain-containing protein OS=Triticum aestivum OX=4565 GN=CAMPLR22A2D_LOCUS3974 PE=3 SV=1	0W_2	3	555.608	-1.0387	0.00036672	1	47.622	959990000
111	AAAAGAAHPTYFEMIK	16	A0A1D5ULT3	H15 domain-containing protein OS=Triticum aestivum OX=4565 GN=CAMPLR22A2D_LOCUS3974 PE=3 SV=1	0W_2	2	832.909	0.17226	0.00065947	1	48.527	175100000
112	AAAAGAAHPTYFEMIK	16	A0A1D5ULT3	H15 domain-containing protein OS=Triticum aestivum OX=4565 GN=CAMPLR22A2D_LOCUS3974 PE=3 SV=1	0W_2	2	832.909	0.37026	5.7193e-05	1	60.901	115170000
113	AAAAGAAHPTYFEMIK	16	A0A1D5ULT3	H15 domain-containing protein OS=Triticum aestivum OX=4565 GN=CAMPLR22A2D_LOCUS3974 PE=3 SV=1	0W_2	3	555.608	-0.76603	0.0016246	1	40.983	977290000
114	AAAAGAAHPTYFEMIK	16	A0A1D5ULT3	H15 domain-containing protein OS=Triticum aestivum OX=4565 GN=CAMPLR22A2D_LOCUS3974 PE=3 SV=1	0W_2	2	832.909	-2.9103	0.000672	1	48.351	132840000
115	AAAAGAAHPTYFEMIK	16	A0A1D5ULT3	H15 domain-containing protein OS=Triticum aestivum OX=4565 GN=CAMPLR22A2D_LOCUS3974 PE=3 SV=1	2W_2	2	832.909	0.30067	3.0359e-21	1	140.03	558770000
116	AAAAGAAHPTYFEMIK	16	A0A1D5ULT3	H15 domain-containing protein OS=Triticum aestivum OX=4565 GN=CAMPLR22A2D_LOCUS3974 PE=3 SV=1	2W_2	2	832.909	0.061628	5.4732e-07	1	104.97	102770000
117	AAAAGAAHPTYFEMIK	16	A0A1D5ULT3	H15 domain-containing protein OS=Triticum aestivum OX=4565 GN=CAMPLR22A2D_LOCUS3974 PE=3 SV=1	2W_2	3	555.608	-0.37271	0.00018705	1	52.599	745330000
118	AAAAGAAHPTYFEMIK	16	A0A1D5ULT3	H15 domain-containing protein OS=Triticum aestivum OX=4565 GN=CAMPLR22A2D_LOCUS3974 PE=3 SV=1	0W_3	3	555.608	-0.58598	0.00019351	1	52.42	935650000
119	AAAAGAAHPTYFEMIK	16	A0A1D5ULT3	H15 domain-containing protein OS=Triticum aestivum OX=4565 GN=CAMPLR22A2D_LOCUS3974 PE=3 SV=1	0W_3	2	832.909	0.36815	9.2058e-06	1	93.243	177960000
120	AAAAGAAHPTYFEMIK	16	A0A1D5ULT3	H15 domain-containing protein OS=Triticum aestivum OX=4565 GN=CAMPLR22A2D_LOCUS3974 PE=3 SV=1	0W_3	2	832.909	0.024374	1.375e-05	1	71.531	134130000
121	AAAAGAAHPTYFEMIK	16	A0A1D5ULT3	H15 domain-containing protein OS=Triticum aestivum OX=4565 GN=CAMPLR22A2D_LOCUS3974 PE=3 SV=1	0W_3	3	555.608	-0.42902	0.0016246	1	40.983	943830000
122	AAAAGAAHPTYFEMIK	16	A0A1D5ULT3	H15 domain-containing protein OS=Triticum aestivum OX=4565 GN=CAMPLR22A2D_LOCUS3974 PE=3 SV=1	0W_3	2	832.909	-2.4557	0.00082488	1	46.206	130510000
123	AAAAGAAHPTYFEMIK	16	A0A1D5ULT3	H15 domain-containing protein OS=Triticum aestivum OX=4565 GN=CAMPLR22A2D_LOCUS3974 PE=3 SV=1	2W_3	3	555.608	-0.99426	2.2443e-05	1	63.062	2250600000
124	AAAAGAAHPTYFEMIK	16	A0A1D5ULT3	H15 domain-containing protein OS=Triticum aestivum OX=4565 GN=CAMPLR22A2D_LOCUS3974 PE=3 SV=1	2W_3	2	832.909	-0.089483	5.416e-05	1	61.409	578920000
125	AAAAGAAHPTYFEMIK	16	A0A1D5ULT3	H15 domain-containing protein OS=Triticum aestivum OX=4565 GN=CAMPLR22A2D_LOCUS3974 PE=3 SV=1	2W_3	2	832.909	-0.23107	6.9619e-05	1	58.817	91989000
126	AAAAGAAHPTYFEMIK	16	A0A1D5ULT3	H15 domain-containing protein OS=Triticum aestivum OX=4565 GN=CAMPLR22A2D_LOCUS3974 PE=3 SV=1	2W_3	3	555.608	-0.1017	0.00023017	1	51.405	737120000
127	AAAAGAAHPTYFEMIK	16	A0A1D5ULT3	H15 domain-containing protein OS=Triticum aestivum OX=4565 GN=CAMPLR22A2D_LOCUS3974 PE=3 SV=1	2W_3	2	832.909	-2.6834	8.231e-06	1	75.764	122220000
128	AAAAGAAHPTYFEMIK	16	A0A1D5ULT3	H15 domain-containing protein OS=Triticum aestivum OX=4565 GN=CAMPLR22A2D_LOCUS3974 PE=3 SV=1	2W_2	2	832.909	-3.3543	NaN	0		131670000
129	AAAAGAAHPTYFEMIK	16	A0A1D5ULT3	H15 domain-containing protein OS=Triticum aestivum OX=4565 GN=CAMPLR22A2D_LOCUS3974 PE=3 SV=1	2W_3	3	555.608	0.053705	NaN	0		4553600
130	AAAAGAAHPTYFEMIK	16	A0A1D5ULT3	H15 domain-containing protein OS=Triticum aestivum OX=4565 GN=CAMPLR22A2D_LOCUS3974 PE=3 SV=1	0W_1	3	550.277	-0.2478	0.00012312	1	54.402	7362300000
131	AAAAGAAHPTYFEMIK	16	A0A1D5ULT3	H15 domain-containing protein OS=Triticum aestivum OX=4565 GN=CAMPLR22A2D_LOCUS3974 PE=3 SV=1	0W_1	2	824.911	-0.48956	1.9598e-33	1	162.29	1095900000
132	AAAAGAAHPTYFEMIK	16	A0A1D5ULT3	H15 domain-containing protein OS=Triticum aestivum OX=4565 GN=CAMPLR22A2D_LOCUS3974 PE=3 SV=1	0W_1	3	550.277	-0.72557	0.00030818	3	49.325	2534700000
133	AAAAGAAHPTYFEMIK	16	A0A1D5ULT3	H15 domain-containing protein OS=Triticum aestivum OX=4565 GN=CAMPLR22A2D_LOCUS3974 PE=3 SV=1	2W_1	3	550.277	0.066403	0.00037445	1	47.506	4575500000
134	AAAAGAAHPTYFEMIK	16	A0A1D5ULT3	H15 domain-containing protein OS=Triticum aestivum OX=4565 GN=CAMPLR22A2D_LOCUS3974 PE=3 SV=1	2W_1	2	824.911	-0.48667	1.452e-37	1	169.37	601890000
135	AAAAGAAHPTYFEMIK	16	A0A1D5ULT3	H15 domain-containing protein OS=Triticum aestivum OX=4565 GN=CAMPLR22A2D_LOCUS3974 PE=3 SV=1	2W_1	3	550.277	-0.51988	0.00098582	2	43.69	894010000
136	AAAAGAAHPTYFEMIK	16	A0A1D5ULT3	H15 domain-containing protein OS=Triticum aestivum OX=4565 GN=CAMPLR22A2D_LOCUS3974 PE=3 SV=1	0W_2	3	550.277	0.074305	0.00031035	2	49.265	6622900000
137	AAAAGAAHPTYFEMIK	16	A0A1D5ULT3	H15 domain-containing protein OS=Triticum aestivum OX=4565 GN=CAMPLR22A2D_LOCUS3974 PE=3 SV=1	0W_2	2	824.911	-0.35562	1.1927e-37	2	170.11	864820000
138	AAAAGAAHPTYFEMIK	16	A0A1D5ULT3	H15 domain-containing protein OS=Triticum aestivum OX=4565 GN=CAMPLR22A2D_LOCUS3974 PE=3 SV=1	0W_2	3	550.277	-0.48116	2.9043e-05	2	60.968	2492400000
139	AAAAGAAHPTYFEMIK	16	A0A1D5ULT3	H15 domain-containing protein OS=Triticum aestivum OX=4565 GN=CAMPLR22A2D_LOCUS3974 PE=3 SV=1	2W_2	2	824.911	-0.5365	1.5997e-33	1	162.41	692400000
140	AAAAGAAHPTYFEMIK	16	A0A1D5ULT3	H15 domain-containing protein OS=Triticum aestivum OX=4565 GN=CAMPLR22A2D_LOCUS3974 PE=3 SV=1	2W_2	3	550.277	-0.0073742	3.2972e-05	1	59.68	4777700000
141	AAAAGAAHPTYFEMIK	16	A0A1D5ULT3	H15 domain-containing protein OS=Triticum aestivum OX=4565 GN=CAMPLR22A2D_LOCUS3974 PE=3 SV=1	2W_2	3	550.277	-0.40354	0.0001606	2	53.374	1000400000
142	AAAAGAAHPTYFEMIK	16	A0A1D5ULT3	H15 domain-containing protein OS=Triticum aestivum OX=4565 GN=CAMPLR22A2D_LOCUS3974 PE=3 SV=1	0W_3	3	550.277	-0.34536	0.001827	3	40.211	5907900000
143	AAAAGAAHPTYFEMIK	16	A0A1D5ULT3	H15 domain-containing protein OS=Triticum aestivum OX=4565 GN=CAMPLR22A2D_LOCUS3974 PE=3 SV=1	0W_3	2	824.911	-0.56729	2.1992e-20	2	137.21	1024700000
144	AAAAGAAHPTYFEMIK	16	A0A1D5ULT3	H15 domain-containing protein OS=Triticum aestivum OX=4565 GN=CAMPLR22A2D_LOCUS3974 PE=3 SV=1	0W_3	3	550.277	-0.28437	0.00031035	2	49.265	2234000000
145	AAAAGAAHPTYFEMIK	16	A0A1D5ULT3	H15 domain-containing protein OS=Triticum aestivum OX=4565 GN=CAMPLR22A2D_LOCUS3974 PE=3 SV=1	2W_3	2	824.911	-0.52356	3.3875e-37	2	163.8	752350000
146	AAAAGAAHPTYFEMIK	16	A0A1D5ULT3	H15 domain-containing protein OS=Triticum aestivum OX=4565 GN=CAMPLR22A2D_LOCUS3974 PE=3 SV=1	2W_3	3	550.277	-0.11317	5.2643e-06	1	82.925	4908100000
147	AAAAGAAHPTYFEMIK	16	A0A1D5ULT3	H15 domain-containing protein OS=Triticum aestivum OX=4565 GN=CAMPLR22A2D_LOCUS3974 PE=3 SV=1	2W_3	3	550.277	-0.27985	0.02085	3	25.978	978640000
148	AAAAGASHPTYFEMIK	16	A0A3B6DKU9	H15 domain-containing protein OS=Triticum aestivum OX=4565 PE=3 SV=1	0W_1	3	555.608	-0.53791	0.034267	1	22.857	164020000
149	AAAAGASHPTYFEMIK	16	A0A3B6DKU9	H15 domain-containing protein OS=Triticum aestivum OX=4565 PE=3 SV=1	2W_1	3	555.608	-0.40671	0.00012312	1	54.402	69946000
150	AAAAGASHPTYFEMIK	16	A0A3B6DKU9	H15 domain-containing protein OS=Triticum aestivum OX=4565 PE=3 SV=1	2W_1	2	832.909	-0.49489	2.9964e-05	1	73.386	8006600
151	AAAAGASHPTYFEMIK	16	A0A3B6DKU9	H15 domain-containing protein OS=Triticum aestivum OX=4565 PE=3 SV=1	0W_2	3	555.608	-0.68972	0.0080582	1	32.702	164930000
152	AAAAGASHPTYFEMIK	16	A0A3B6DKU9	H15 domain-containing protein OS=Triticum aestivum OX=4565 PE=3 SV=1	0W_2	2	832.909	0.9073	1.2632e-06	1	105.58	38109000
153	AAAAGASHPTYFEMIK	16	A0A3B6DKU9	H15 domain-containing protein OS=Triticum aestivum OX=4565 PE=3 SV=1	2W_2	3	555.608	-0.76349	0.0014336	1	41.838	84885000
154	AAAAGASHPTYFEMIK	16	A0A3B6DKU9	H15 domain-containing protein OS=Triticum aestivum OX=4565 PE=3 SV=1	2W_2	2	832.909	-0.59508	2.1308e-05	1	94.09	15366000
155	AAAAGASHPTYFEMIK	16	A0A3B6DKU9	H15 domain-containing protein OS=Triticum aestivum OX=4565 PE=3 SV=1	0W_3	3	555.608	-0.68376	3.7854e-05	1	58.079	161270000
156	AAAAGASHPTYFEMIK	16	A0A3B6DKU9	H15 domain-containing protein OS=Triticum aestivum OX=4565 PE=3 SV=1	0W_3	2	832.909	0.70738	1.8389e-09	1	115.91	30303000
157	AAAAGASHPTYFEMIK	16	A0A3B6DKU9	H15 domain-containing protein OS=Triticum aestivum OX=4565 PE=3 SV=1	2W_3	3	555.608	-0.52862	0.012105	1	30.575	72688000
158	AAAAGASHPTYFEMIK	16	A0A3B6DKU9	H15 domain-containing protein OS=Triticum aestivum OX=4565 PE=3 SV=1	2W_3	2	832.909	-0.50654	0.00014322	1	61.409	15003000
159	AAAAGASHPTYFEMIK	16	A0A3B6DKU9	H15 domain-containing protein OS=Triticum aestivum OX=4565 PE=3 SV=1	0W_1	2	832.909	1.054	NaN	0		35490000
160	AAAAGASHPTYFEMIK	16	A0A3B6DKU9	H15 domain-containing protein OS=Triticum aestivum OX=4565 PE=3 SV=1	0W_2	3	555.608	-0.31241	NaN	0		1381000
161	AAAAGDLASFMPPGVYTLADLR	22	A0A3B5ZPW8	Helicase ATP-binding domain-containing protein OS=Triticum aestivum OX=4565 PE=4 SV=1	2W_1	3	736.377	-0.12637	0.00017831	1	46.953	13404000
162	AAAAGDLASFMPPGVYTLADLR	22	A0A3B5ZPW8	Helicase ATP-binding domain-containing protein OS=Triticum aestivum OX=4565 PE=4 SV=1	2W_2	3	736.377	-0.086774	0.00028005	1	40.622	13116000
163	AAAAGDLASFMPPGVYTLADLR	22	A0A3B5ZPW8	Helicase ATP-binding domain-containing protein OS=Triticum aestivum OX=4565 PE=4 SV=1	2W_3	3	736.377	-0.46192	0.00045784	1	35.091	13177000
164	AAAAGDLASFMPPGVYTLADLR	22	A0A3B5ZPW8	Helicase ATP-binding domain-containing protein OS=Triticum aestivum OX=4565 PE=4 SV=1	0W_2	3	736.377	-0.11377	NaN	0		372760
165	AAAAGDLASFMPPGVYTLADLR	22	A0A3B5ZPW8	Helicase ATP-binding domain-containing protein OS=Triticum aestivum OX=4565 PE=4 SV=1	0W_3	3	736.377	-0.051338	NaN	0		364790
166	AAAAHGVALVAPDTSPR	17	W5D6S5	S-formylglutathione hydrolase OS=Triticum aestivum OX=4565 GN=TRAES_3BF047500040CFD_c1 PE=3 SV=1	2W_1	2	802.431	-1.4452	0.00035963	1	55.011	2929900
167	AAAAHGVALVAPDTSPR	17	W5D6S5	S-formylglutathione hydrolase OS=Triticum aestivum OX=4565 GN=TRAES_3BF047500040CFD_c1 PE=3 SV=1	2W_2	2	802.431	-1.2252	1.5698e-05	1	69.331	4247900
168	AAAAHGVALVAPDTSPR	17	W5D6S5	S-formylglutathione hydrolase OS=Triticum aestivum OX=4565 GN=TRAES_3BF047500040CFD_c1 PE=3 SV=1	2W_3	2	802.431	-2.0551	0.0010023	1	49.595	4410400
169	AAAAHGVALVAPDTSPR	17	W5D6S5	S-formylglutathione hydrolase OS=Triticum aestivum OX=4565 GN=TRAES_3BF047500040CFD_c1 PE=3 SV=1	0W_1	2	802.431	-1.4818	NaN	0		4039700
170	AAAAMAAHR	9	A0A3B6LGV2	E3 ubiquitin-protein ligase UPL1(predicted) OS=Triticum aestivum OX=4565 PE=4 SV=1	0W_1	2	456.229	-1.4976	0.03968	1	44.349	7541800
171	AAAAMAAHR	9	A0A3B6LGV2	E3 ubiquitin-protein ligase UPL1(predicted) OS=Triticum aestivum OX=4565 PE=4 SV=1	0W_3	2	456.229	-1.9051	0.03968	1	44.349	6576400
172	AAAAMAAHR	9	A0A3B6LGV2	E3 ubiquitin-protein ligase UPL1(predicted) OS=Triticum aestivum OX=4565 PE=4 SV=1	0W_2	2	456.229	-2.2178	NaN	0		6724500
173	AAAAMVGHPEWEFPHDSGTYNDTPER	26	A0A3B6IYD4	Beta-amylase OS=Triticum aestivum OX=4565 PE=3 SV=1	0W_1	4	722.07	-0.66076	3.8321e-06	1	41.047	37284000
174	AAAAMVGHPEWEFPHDSGTYNDTPER	26	A0A3B6IYD4	Beta-amylase OS=Triticum aestivum OX=4565 PE=3 SV=1	2W_1	4	722.07	-0.3972	7.4034e-10	1	72.935	54808000
175	AAAAMVGHPEWEFPHDSGTYNDTPER	26	A0A3B6IYD4	Beta-amylase OS=Triticum aestivum OX=4565 PE=3 SV=1	2W_1	3	962.424	0.63939	0.00089996	1	25.157	9710500
176	AAAAMVGHPEWEFPHDSGTYNDTPER	26	A0A3B6IYD4	Beta-amylase OS=Triticum aestivum OX=4565 PE=3 SV=1	0W_2	4	722.07	-0.78544	1.73e-07	1	55.051	25723000
177	AAAAMVGHPEWEFPHDSGTYNDTPER	26	A0A3B6IYD4	Beta-amylase OS=Triticum aestivum OX=4565 PE=3 SV=1	2W_2	4	722.07	-0.32284	9.2826e-10	1	71.678	54270000
178	AAAAMVGHPEWEFPHDSGTYNDTPER	26	A0A3B6IYD4	Beta-amylase OS=Triticum aestivum OX=4565 PE=3 SV=1	2W_3	4	722.07	-0.28454	1.3892e-08	1	66.017	54659000
179	AAAAMVGHPEWEFPHDSGTYNDTPER	26	A0A3B6IYD4	Beta-amylase OS=Triticum aestivum OX=4565 PE=3 SV=1	0W_1	3	962.424	-0.083322	NaN	0		5607300
180	AAAAMVGHPEWEFPHDSGTYNDTPER	26	A0A3B6IYD4	Beta-amylase OS=Triticum aestivum OX=4565 PE=3 SV=1	0W_2	3	962.424	0.16372	NaN	0		4141300
181	AAAAMVGHPEWEFPHDSGTYNDTPER	26	A0A3B6IYD4	Beta-amylase OS=Triticum aestivum OX=4565 PE=3 SV=1	2W_2	3	962.424	0.53686	NaN	0		13418000
182	AAAAMVGHPEWEFPHDSGTYNDTPER	26	A0A3B6IYD4	Beta-amylase OS=Triticum aestivum OX=4565 PE=3 SV=1	0W_3	4	722.07	-0.399	NaN	0		29417000
183	AAAAMVGHPEWEFPHDSGTYNDTPER	26	A0A3B6IYD4	Beta-amylase OS=Triticum aestivum OX=4565 PE=3 SV=1	2W_3	3	962.424	0.46572	NaN	0		7737300
184	AAAAMVGHPEWEFPHDSGTYNDTPER	26	A0A3B6IYD4	Beta-amylase OS=Triticum aestivum OX=4565 PE=3 SV=1	2W_1	4	726.069	0.060321	5.0991e-12	1	79.935	21646000
185	AAAAMVGHPEWEFPHDSGTYNDTPER	26	A0A3B6IYD4	Beta-amylase OS=Triticum aestivum OX=4565 PE=3 SV=1	2W_2	4	726.069	-0.74408	4.0753e-06	1	45.579	19911000
186	AAAAMVGHPEWEFPHDSGTYNDTPER	26	A0A3B6IYD4	Beta-amylase OS=Triticum aestivum OX=4565 PE=3 SV=1	2W_3	4	726.069	-0.65788	7.405e-09	1	67.877	21135000
187	AAAAMVGHPEWEFPHDSGTYNDTPER	26	A0A3B6IYD4	Beta-amylase OS=Triticum aestivum OX=4565 PE=3 SV=1	0W_2	4	726.069	-1.1679	NaN	0		4020700
188	AAAAMVGHPEWEFPHDSGTYNDTPER	26	A0A3B6IYD4	Beta-amylase OS=Triticum aestivum OX=4565 PE=3 SV=1	0W_3	4	726.069	-1.1709	NaN	0		3560400
189	AAAAMVGHPEWEFPR	15	A0A3B6U9P0	Beta-amylase OS=Triticum aestivum OX=4565 PE=3 SV=1	0W_1	3	562.268	-0.15427	1.9261e-05	1	74.853	26880000
190	AAAAMVGHPEWEFPR	15	A0A3B6U9P0	Beta-amylase OS=Triticum aestivum OX=4565 PE=3 SV=1	2W_1	3	562.268	-0.96932	2.2543e-05	1	91.812	50957000
191	AAAAMVGHPEWEFPR	15	A0A3B6U9P0	Beta-amylase OS=Triticum aestivum OX=4565 PE=3 SV=1	0W_2	3	562.268	-0.43081	2.6336e-05	1	72.321	26864000
192	AAAAMVGHPEWEFPR	15	A0A3B6U9P0	Beta-amylase OS=Triticum aestivum OX=4565 PE=3 SV=1	2W_2	3	562.268	-0.87412	2.8744e-05	1	87.083	50061000
193	AAAAMVGHPEWEFPR	15	A0A3B6U9P0	Beta-amylase OS=Triticum aestivum OX=4565 PE=3 SV=1	2W_2	2	842.899	-1.0947	0.0012743	1	47.037	3879100
194	AAAAMVGHPEWEFPR	15	A0A3B6U9P0	Beta-amylase OS=Triticum aestivum OX=4565 PE=3 SV=1	0W_3	3	562.268	-0.77607	0.00062111	1	47.506	26391000
195	AAAAMVGHPEWEFPR	15	A0A3B6U9P0	Beta-amylase OS=Triticum aestivum OX=4565 PE=3 SV=1	2W_3	3	562.268	-0.16753	1.2726e-05	1	77.192	54607000
196	AAAAMVGHPEWEFPR	15	A0A3B6U9P0	Beta-amylase OS=Triticum aestivum OX=4565 PE=3 SV=1	2W_3	2	842.899	0.03751	0.0044237	1	40.941	3499900
197	AAAAMVGHPEWEFPR	15	A0A3B6U9P0	Beta-amylase OS=Triticum aestivum OX=4565 PE=3 SV=1	0W_2	2	842.899	-0.26953	NaN	0		1778600
198	AAAAMVGHPEWEFPR	15	A0A3B6U9P0	Beta-amylase OS=Triticum aestivum OX=4565 PE=3 SV=1	0W_3	2	842.899	0.16804	NaN	0		1541700
199	AAAAMVGHPEWEFPR	15	A0A3B6U9P0	Beta-amylase OS=Triticum aestivum OX=4565 PE=3 SV=1	2W_3	2	842.899	-1.5162	NaN	0		4393200
200	AAAAMVGHPEWEFPR	15	A0A3B6U9P0	Beta-amylase OS=Triticum aestivum OX=4565 PE=3 SV=1	0W_1	3	556.937	0.19886	2.6569e-05	1	85.837	84334000
201	AAAAMVGHPEWEFPR	15	A0A3B6U9P0	Beta-amylase OS=Triticum aestivum OX=4565 PE=3 SV=1	2W_1	3	556.937	-0.049673	7.1513e-05	1	64.244	134110000
202	AAAAMVGHPEWEFPR	15	A0A3B6U9P0	Beta-amylase OS=Triticum aestivum OX=4565 PE=3 SV=1	0W_2	3	556.937	0.23051	3.2405e-05	1	70.26	85045000
203	AAAAMVGHPEWEFPR	15	A0A3B6U9P0	Beta-amylase OS=Triticum aestivum OX=4565 PE=3 SV=1	2W_2	3	556.937	0.27478	2.5807e-05	1	85.45	136780000
204	AAAAMVGHPEWEFPR	15	A0A3B6U9P0	Beta-amylase OS=Triticum aestivum OX=4565 PE=3 SV=1	0W_3	3	556.937	-0.11965	1.8892e-09	1	115.12	93560000
205	AAAAMVGHPEWEFPR	15	A0A3B6U9P0	Beta-amylase OS=Triticum aestivum OX=4565 PE=3 SV=1	2W_3	3	556.937	0.12958	1.1469e-06	1	105.19	145660000
206	AAAAPAAPVASQAQAVLR	18	A0A3B6ELT0	Origin of replication complex subunit 4 OS=Triticum aestivum OX=4565 PE=3 SV=1	2W_2	2	852.973	0.13788	0.00020929	1	52.172	8481700
207	AAAAPAAPVASQAQAVLR	18	A0A3B6ELT0	Origin of replication complex subunit 4 OS=Triticum aestivum OX=4565 PE=3 SV=1	2W_1	2	852.973	0.80484	NaN	0		10232000
208	AAAASLLGK	9	A0A3B5YY68	J domain-containing protein OS=Triticum aestivum OX=4565 PE=4 SV=1	0W_1	2	401.245	0.48405	0.012577	1	62.463	12816000
209	AAAASLLGK	9	A0A3B5YY68	J domain-containing protein OS=Triticum aestivum OX=4565 PE=4 SV=1	0W_2	2	401.245	0.15119	0.023074	1	55.461	13866000
210	AAAASLLGK	9	A0A3B5YY68	J domain-containing protein OS=Triticum aestivum OX=4565 PE=4 SV=1	2W_2	2	401.245	-0.027981	0.012577	1	62.463	20205000
211	AAAASLLGK	9	A0A3B5YY68	J domain-containing protein OS=Triticum aestivum OX=4565 PE=4 SV=1	2W_1	2	401.245	-0.10251	NaN	0		20105000
212	AAAASLLGK	9	A0A3B5YY68	J domain-containing protein OS=Triticum aestivum OX=4565 PE=4 SV=1	0W_3	2	401.245	-0.088162	NaN	0		12285000
213	AAAASLLGK	9	A0A3B5YY68	J domain-containing protein OS=Triticum aestivum OX=4565 PE=4 SV=1	2W_3	2	401.245	-0.15874	NaN	0		25710000
214	AAAASPPAAALEQLSK	16	W5D6S5	S-formylglutathione hydrolase OS=Triticum aestivum OX=4565 GN=TRAES_3BF047500040CFD_c1 PE=3 SV=1	0W_1	2	769.415	-0.3219	0.00069873	1	48.391	8332400
215	AAAASPPAAALEQLSK	16	W5D6S5	S-formylglutathione hydrolase OS=Triticum aestivum OX=4565 GN=TRAES_3BF047500040CFD_c1 PE=3 SV=1	2W_1	2	769.415	-0.10414	0.00033678	1	53.255	13231000
216	AAAASPPAAALEQLSK	16	W5D6S5	S-formylglutathione hydrolase OS=Triticum aestivum OX=4565 GN=TRAES_3BF047500040CFD_c1 PE=3 SV=1	0W_2	2	769.415	-0.15967	0.00020615	1	55.011	7361300
217	AAAASPPAAALEQLSK	16	W5D6S5	S-formylglutathione hydrolase OS=Triticum aestivum OX=4565 GN=TRAES_3BF047500040CFD_c1 PE=3 SV=1	2W_2	2	769.415	-0.20705	6.2285e-05	1	60.489	15116000
218	AAAASPPAAALEQLSK	16	W5D6S5	S-formylglutathione hydrolase OS=Triticum aestivum OX=4565 GN=TRAES_3BF047500040CFD_c1 PE=3 SV=1	2W_3	2	769.415	-0.46991	6.3799e-05	1	60.246	12256000
219	AAAASPPAAALEQLSK	16	W5D6S5	S-formylglutathione hydrolase OS=Triticum aestivum OX=4565 GN=TRAES_3BF047500040CFD_c1 PE=3 SV=1	2W_1	2	769.415	-3.6147	NaN	0		3435800
220	AAAASSASSVHDFTVK	16	A0A3B6QI62	Glutathione peroxidase OS=Triticum aestivum OX=4565 PE=3 SV=1	2W_1	2	795.892	1.2488	8.3955e-06	1	75.911	9668900
221	AAAASSASSVHDFTVK	16	A0A3B6QI62	Glutathione peroxidase OS=Triticum aestivum OX=4565 PE=3 SV=1	2W_2	2	795.892	0.97925	0.00055632	1	50.305	7811800
222	AAAASSASSVHDFTVK	16	A0A3B6QI62	Glutathione peroxidase OS=Triticum aestivum OX=4565 PE=3 SV=1	2W_3	2	795.892	0.45457	1.7354e-05	1	69.331	8190300
223	AAAASSASSVHDFTVK	16	A0A3B6QI62	Glutathione peroxidase OS=Triticum aestivum OX=4565 PE=3 SV=1	0W_3	2	795.892	0.97929	NaN	0		5273400
224	AAAASSSSPPAAITCR	16	A0A3B6PMD0	Alcohol dehydrogenase-like 6(predicted) OS=Triticum aestivum OX=4565 PE=3 SV=1	0W_1	2	780.378	-0.38061	0.00085304	1	46.318	1810000
225	AAAASSSSPPAAITCR	16	A0A3B6PMD0	Alcohol dehydrogenase-like 6(predicted) OS=Triticum aestivum OX=4565 PE=3 SV=1	2W_2	2	780.378	-1.7304	NaN	0		1877200
226	AAAASSSSPPAAITCR	16	A0A3B6PMD0	Alcohol dehydrogenase-like 6(predicted) OS=Triticum aestivum OX=4565 PE=3 SV=1	0W_3	2	780.378	-1.0172	NaN	0		1547500
227	AAAASSSSPPAAITCR	16	A0A3B6PMD0	Alcohol dehydrogenase-like 6(predicted) OS=Triticum aestivum OX=4565 PE=3 SV=1	2W_3	2	780.378	-0.78602	NaN	0		3335600
228	AAAASTMLESLPAPLLR	17	A0A2X0SD55	Dolichyl-diphosphooligosaccharide--protein glycosyltransferase subunit STT3B(predicted) OS=Triticum aestivum OX=4565 GN=CAMPLR22A2D_LOCUS5508 PE=4 SV=1	0W_1	2	856.474	1.2337	8.0737e-05	1	62.861	5719000
229	AAAASTMLESLPAPLLR	17	A0A2X0SD55	Dolichyl-diphosphooligosaccharide--protein glycosyltransferase subunit STT3B(predicted) OS=Triticum aestivum OX=4565 GN=CAMPLR22A2D_LOCUS5508 PE=4 SV=1	0W_2	2	856.474	0.94082	9.2085e-05	1	62.055	5927900
230	AAAASTMLESLPAPLLR	17	A0A2X0SD55	Dolichyl-diphosphooligosaccharide--protein glycosyltransferase subunit STT3B(predicted) OS=Triticum aestivum OX=4565 GN=CAMPLR22A2D_LOCUS5508 PE=4 SV=1	0W_3	2	856.474	-0.59727	0.00027131	1	55.755	5567000
231	AAAASTMLESLPAPLLR	17	A0A2X0SD55	Dolichyl-diphosphooligosaccharide--protein glycosyltransferase subunit STT3B(predicted) OS=Triticum aestivum OX=4565 GN=CAMPLR22A2D_LOCUS5508 PE=4 SV=1	2W_1	2	856.474	-1.4257	NaN	0		9134600
232	AAAASTMLESLPAPLLR	17	A0A2X0SD55	Dolichyl-diphosphooligosaccharide--protein glycosyltransferase subunit STT3B(predicted) OS=Triticum aestivum OX=4565 GN=CAMPLR22A2D_LOCUS5508 PE=4 SV=1	2W_2	2	856.474	-0.99193	NaN	0		7102500
233	AAAASTMLESLPAPLLR	17	A0A2X0SD55	Dolichyl-diphosphooligosaccharide--protein glycosyltransferase subunit STT3B(predicted) OS=Triticum aestivum OX=4565 GN=CAMPLR22A2D_LOCUS5508 PE=4 SV=1	2W_3	2	856.474	-1.0176	NaN	0		11467000
234	AAAASTMLESLPAPLLR	17	A0A2X0SD55	Dolichyl-diphosphooligosaccharide--protein glycosyltransferase subunit STT3B(predicted) OS=Triticum aestivum OX=4565 GN=CAMPLR22A2D_LOCUS5508 PE=4 SV=1	2W_1	2	885.477	0.2851	7.3414e-06	1	65.374	7487200
235	AAAASTMLESLPAPLLR	17	A0A2X0SD55	Dolichyl-diphosphooligosaccharide--protein glycosyltransferase subunit STT3B(predicted) OS=Triticum aestivum OX=4565 GN=CAMPLR22A2D_LOCUS5508 PE=4 SV=1	2W_2	2	885.477	-0.085643	0.00077603	1	42.314	6245900
236	AAAASTMLESLPAPLLR	17	A0A2X0SD55	Dolichyl-diphosphooligosaccharide--protein glycosyltransferase subunit STT3B(predicted) OS=Triticum aestivum OX=4565 GN=CAMPLR22A2D_LOCUS5508 PE=4 SV=1	2W_3	2	885.477	-0.18636	0.00010895	1	52.372	6742400
237	AAAATGTGGQTLGR	14	A0A3B6TRY9	Elongator complex protein 4(predicted) OS=Triticum aestivum OX=4565 PE=4 SV=1	2W_1	2	637.328	0.36824	1.4743e-13	1	127.02	14195000
238	AAAATGTGGQTLGR	14	A0A3B6TRY9	Elongator complex protein 4(predicted) OS=Triticum aestivum OX=4565 PE=4 SV=1	0W_2	2	637.328	1.3991	0.00010285	1	70.889	6838200
239	AAAATGTGGQTLGR	14	A0A3B6TRY9	Elongator complex protein 4(predicted) OS=Triticum aestivum OX=4565 PE=4 SV=1	2W_2	2	637.328	3.4363	1.073e-08	1	110.51	10847000
240	AAAATGTGGQTLGR	14	A0A3B6TRY9	Elongator complex protein 4(predicted) OS=Triticum aestivum OX=4565 PE=4 SV=1	0W_3	2	637.328	1.4638	6.2959e-05	1	84.297	6419400
241	AAAATGTGGQTLGR	14	A0A3B6TRY9	Elongator complex protein 4(predicted) OS=Triticum aestivum OX=4565 PE=4 SV=1	2W_3	2	637.328	0.80728	2.5594e-13	1	124.07	12815000
242	AAAATGTGGQTLGR	14	A0A3B6TRY9	Elongator complex protein 4(predicted) OS=Triticum aestivum OX=4565 PE=4 SV=1	0W_1	2	637.328	1.8796	NaN	0		6750600
243	AAAATTMLDSLPAPLLR	17	A0A3B6CGC5	Dolichyl-diphosphooligosaccharide--protein glycosyltransferase subunit STT3B(predicted) OS=Triticum aestivum OX=4565 PE=4 SV=1	2W_1	3	590.654	-0.81906	0.0012807	1	50.305	2769500
244	AAAATTMLDSLPAPLLR	17	A0A3B6CGC5	Dolichyl-diphosphooligosaccharide--protein glycosyltransferase subunit STT3B(predicted) OS=Triticum aestivum OX=4565 PE=4 SV=1	2W_1	2	885.477	2.902	7.3414e-06	1	65.374	7686000
245	AAAATTMLDSLPAPLLR	17	A0A3B6CGC5	Dolichyl-diphosphooligosaccharide--protein glycosyltransferase subunit STT3B(predicted) OS=Triticum aestivum OX=4565 PE=4 SV=1	2W_2	3	590.654	-2.4581	0.0012807	1	50.305	3210300
246	AAAATTMLDSLPAPLLR	17	A0A3B6CGC5	Dolichyl-diphosphooligosaccharide--protein glycosyltransferase subunit STT3B(predicted) OS=Triticum aestivum OX=4565 PE=4 SV=1	2W_3	2	885.477	1.6476	3.0452e-06	1	67.326	7614100
247	AAAATTMLDSLPAPLLR	17	A0A3B6CGC5	Dolichyl-diphosphooligosaccharide--protein glycosyltransferase subunit STT3B(predicted) OS=Triticum aestivum OX=4565 PE=4 SV=1	0W_1	2	885.477	1.7669	NaN	0		890870
248	AAAATTMLDSLPAPLLR	17	A0A3B6CGC5	Dolichyl-diphosphooligosaccharide--protein glycosyltransferase subunit STT3B(predicted) OS=Triticum aestivum OX=4565 PE=4 SV=1	0W_1	3	590.654	0.26897	NaN	0		720260
249	AAAATTMLDSLPAPLLR	17	A0A3B6CGC5	Dolichyl-diphosphooligosaccharide--protein glycosyltransferase subunit STT3B(predicted) OS=Triticum aestivum OX=4565 PE=4 SV=1	2W_1	2	885.477	2.5226	NaN	0		1689700
250	AAAATTMLDSLPAPLLR	17	A0A3B6CGC5	Dolichyl-diphosphooligosaccharide--protein glycosyltransferase subunit STT3B(predicted) OS=Triticum aestivum OX=4565 PE=4 SV=1	0W_2	2	885.477	1.1209	NaN	0		1067100
251	AAAATTMLDSLPAPLLR	17	A0A3B6CGC5	Dolichyl-diphosphooligosaccharide--protein glycosyltransferase subunit STT3B(predicted) OS=Triticum aestivum OX=4565 PE=4 SV=1	0W_2	3	590.654	0.46437	NaN	0		880760
252	AAAATTMLDSLPAPLLR	17	A0A3B6CGC5	Dolichyl-diphosphooligosaccharide--protein glycosyltransferase subunit STT3B(predicted) OS=Triticum aestivum OX=4565 PE=4 SV=1	0W_3	2	885.477	1.3992	NaN	0		864220
253	AAAATTMLDSLPAPLLR	17	A0A3B6CGC5	Dolichyl-diphosphooligosaccharide--protein glycosyltransferase subunit STT3B(predicted) OS=Triticum aestivum OX=4565 PE=4 SV=1	0W_3	3	590.654	0.027247	NaN	0		515010
254	AAAATTMLDSLPAPLLR	17	A0A3B6CGC5	Dolichyl-diphosphooligosaccharide--protein glycosyltransferase subunit STT3B(predicted) OS=Triticum aestivum OX=4565 PE=4 SV=1	2W_3	2	885.477	2.6651	NaN	0		1831700
255	AAAATTMLDSLPAPLLR	17	A0A3B6CGC5	Dolichyl-diphosphooligosaccharide--protein glycosyltransferase subunit STT3B(predicted) OS=Triticum aestivum OX=4565 PE=4 SV=1	2W_3	3	590.654	-3.1608	NaN	0		3330600
256	AAAATTMLDSLPAPLLR	17	A0A3B6CGC5	Dolichyl-diphosphooligosaccharide--protein glycosyltransferase subunit STT3B(predicted) OS=Triticum aestivum OX=4565 PE=4 SV=1	2W_2	2	856.474	-0.8933	1.7015e-05	1	68.481	5363500
257	AAAATTMLDSLPAPLLR	17	A0A3B6CGC5	Dolichyl-diphosphooligosaccharide--protein glycosyltransferase subunit STT3B(predicted) OS=Triticum aestivum OX=4565 PE=4 SV=1	0W_1	2	856.474	-1.909	NaN	0		4532400
258	AAAATTMLDSLPAPLLR	17	A0A3B6CGC5	Dolichyl-diphosphooligosaccharide--protein glycosyltransferase subunit STT3B(predicted) OS=Triticum aestivum OX=4565 PE=4 SV=1	2W_1	2	856.474	-1.133	NaN	0		5246600
259	AAAATTMLDSLPAPLLR	17	A0A3B6CGC5	Dolichyl-diphosphooligosaccharide--protein glycosyltransferase subunit STT3B(predicted) OS=Triticum aestivum OX=4565 PE=4 SV=1	0W_2	2	856.474	-1.1906	NaN	0		5528300
260	AAAATTMLDSLPAPLLR	17	A0A3B6CGC5	Dolichyl-diphosphooligosaccharide--protein glycosyltransferase subunit STT3B(predicted) OS=Triticum aestivum OX=4565 PE=4 SV=1	0W_3	2	856.474	-1.0294	NaN	0		5390900
261	AAAATTMLDSLPAPLLR	17	A0A3B6CGC5	Dolichyl-diphosphooligosaccharide--protein glycosyltransferase subunit STT3B(predicted) OS=Triticum aestivum OX=4565 PE=4 SV=1	2W_3	2	856.474	-0.62534	NaN	0		6375900
262	AAADALAAVQLSDR	14	A0A3B6IMB3	ABC transporter F family member 1(predicted) OS=Triticum aestivum OX=4565 PE=4 SV=1	2W_1	2	686.365	1.1315	0.00015475	1	75.764	13201000
263	AAADALAAVQLSDR	14	A0A3B6IMB3	ABC transporter F family member 1(predicted) OS=Triticum aestivum OX=4565 PE=4 SV=1	0W_2	2	686.365	0.092424	0.0059073	1	46.318	3744600
264	AAADALAAVQLSDR	14	A0A3B6IMB3	ABC transporter F family member 1(predicted) OS=Triticum aestivum OX=4565 PE=4 SV=1	2W_2	2	686.365	0.6109	0.00015475	1	75.764	12041000
265	AAADALAAVQLSDR	14	A0A3B6IMB3	ABC transporter F family member 1(predicted) OS=Triticum aestivum OX=4565 PE=4 SV=1	2W_3	2	686.365	0.53593	0.00014648	1	82.651	10212000
266	AAADALAAVQLSDR	14	A0A3B6IMB3	ABC transporter F family member 1(predicted) OS=Triticum aestivum OX=4565 PE=4 SV=1	0W_1	2	686.365	0.03211	NaN	0		3517600
267	AAADALAAVQLSDR	14	A0A3B6IMB3	ABC transporter F family member 1(predicted) OS=Triticum aestivum OX=4565 PE=4 SV=1	0W_3	2	686.365	0.54683	NaN	0		3853900
268	AAADCVVPTFK	11	A0A3B6D4V2	Eukaryotic translation initiation factor 3 subunit M OS=Triticum aestivum OX=4565 PE=3 SV=1	0W_1	2	589.797	1.5173	0.0084628	1	56.02	13244000
269	AAADCVVPTFK	11	A0A3B6D4V2	Eukaryotic translation initiation factor 3 subunit M OS=Triticum aestivum OX=4565 PE=3 SV=1	2W_1	2	589.797	-0.014853	0.0020827	1	72.34	26986000
270	AAADCVVPTFK	11	A0A3B6D4V2	Eukaryotic translation initiation factor 3 subunit M OS=Triticum aestivum OX=4565 PE=3 SV=1	0W_2	2	589.797	0.80385	0.0022	1	71.153	13615000
271	AAADCVVPTFK	11	A0A3B6D4V2	Eukaryotic translation initiation factor 3 subunit M OS=Triticum aestivum OX=4565 PE=3 SV=1	2W_2	2	589.797	0.11674	0.0032189	1	65.842	26281000
272	AAADCVVPTFK	11	A0A3B6D4V2	Eukaryotic translation initiation factor 3 subunit M OS=Triticum aestivum OX=4565 PE=3 SV=1	0W_3	2	589.797	0.63892	0.0018583	1	74.611	18561000
273	AAADCVVPTFK	11	A0A3B6D4V2	Eukaryotic translation initiation factor 3 subunit M OS=Triticum aestivum OX=4565 PE=3 SV=1	2W_3	2	589.797	0.50971	0.0017389	1	75.819	27692000
274	AAADHPSPSPDAPAAVVAENPAPAAAGR	28	A0A3B6NTV4	Putative DegP2 protease(predicted) OS=Triticum aestivum OX=4565 PE=4 SV=1	0W_2	3	860.093	0.065619	9.0383e-07	1	43.696	2917000
275	AAADHPSPSPDAPAAVVAENPAPAAAGR	28	A0A3B6NTV4	Putative DegP2 protease(predicted) OS=Triticum aestivum OX=4565 PE=4 SV=1	0W_1	3	860.093	0.37756	NaN	0		3657600
276	AAADHPSPSPDAPAAVVAENPAPAAAGR	28	A0A3B6NTV4	Putative DegP2 protease(predicted) OS=Triticum aestivum OX=4565 PE=4 SV=1	0W_3	3	860.093	0.76007	NaN	0		2804400
277	AAADLGPLLDPSAAVSALAFHSIGPVPR	28	A0A3B6KC26	WD_REPEATS_REGION domain-containing protein OS=Triticum aestivum OX=4565 PE=4 SV=1	2W_1	3	905.161	-0.050241	4.0085e-09	1	66.36	46767000
278	AAADLGPLLDPSAAVSALAFHSIGPVPR	28	A0A3B6KC26	WD_REPEATS_REGION domain-containing protein OS=Triticum aestivum OX=4565 PE=4 SV=1	2W_1	4	679.122	-0.2346	0.025978	1	16.051	2510000
279	AAADLGPLLDPSAAVSALAFHSIGPVPR	28	A0A3B6KC26	WD_REPEATS_REGION domain-containing protein OS=Triticum aestivum OX=4565 PE=4 SV=1	2W_2	3	905.161	-0.38832	1.2748e-06	1	42.468	47413000
280	AAADLGPLLDPSAAVSALAFHSIGPVPR	28	A0A3B6KC26	WD_REPEATS_REGION domain-containing protein OS=Triticum aestivum OX=4565 PE=4 SV=1	2W_3	3	905.161	0.34869	1.6127e-07	1	49.094	43469000
281	AAADLGPLLDPSAAVSALAFHSIGPVPR	28	A0A3B6KC26	WD_REPEATS_REGION domain-containing protein OS=Triticum aestivum OX=4565 PE=4 SV=1	2W_2	4	679.122	0.32433	NaN	0		3230100
282	AAADLGPLLDPSAAVSALAFHSIGPVPR	28	A0A3B6KC26	WD_REPEATS_REGION domain-containing protein OS=Triticum aestivum OX=4565 PE=4 SV=1	2W_3	4	679.122	0.7533	NaN	0		2123400
283	AAAEASPATMAAVR	14	A0A3B6B7Q9	RNA-binding protein AKIP1(predicted) OS=Triticum aestivum OX=4565 PE=4 SV=1	0W_1	2	658.835	0.368	0.0002063	1	73.386	30819000
284	AAAEASPATMAAVR	14	A0A3B6B7Q9	RNA-binding protein AKIP1(predicted) OS=Triticum aestivum OX=4565 PE=4 SV=1	2W_1	2	658.835	1.1915	0.0028458	1	53.377	38347000
285	AAAEASPATMAAVR	14	A0A3B6B7Q9	RNA-binding protein AKIP1(predicted) OS=Triticum aestivum OX=4565 PE=4 SV=1	0W_2	2	658.835	0.17199	0.000239	1	71.879	30404000
286	AAAEASPATMAAVR	14	A0A3B6B7Q9	RNA-binding protein AKIP1(predicted) OS=Triticum aestivum OX=4565 PE=4 SV=1	2W_2	2	658.835	0.99292	0.00014991	1	83.087	69577000
287	AAAEASPATMAAVR	14	A0A3B6B7Q9	RNA-binding protein AKIP1(predicted) OS=Triticum aestivum OX=4565 PE=4 SV=1	0W_3	2	658.835	-0.19529	0.00044642	1	66.215	30474000
288	AAAEASPATMAAVR	14	A0A3B6B7Q9	RNA-binding protein AKIP1(predicted) OS=Triticum aestivum OX=4565 PE=4 SV=1	2W_3	2	658.835	1.1486	0.00015855	1	75.589	46477000
289	AAAEGALPVLGHR	13	A0A3B5ZZG7	6-phosphogluconate dehydrogenase, decarboxylating OS=Triticum aestivum OX=4565 PE=3 SV=1	0W_1	3	421.239	-0.51986	0.0015081	1	48.513	3646300
290	AAAEGALPVLGHR	13	A0A3B5ZZG7	6-phosphogluconate dehydrogenase, decarboxylating OS=Triticum aestivum OX=4565 PE=3 SV=1	2W_1	3	421.239	-0.50202	0.01427	1	33.589	5433800
291	AAAEGALPVLGHR	13	A0A3B5ZZG7	6-phosphogluconate dehydrogenase, decarboxylating OS=Triticum aestivum OX=4565 PE=3 SV=1	0W_2	3	421.239	-0.37296	0.004814	1	41.48	4473900
292	AAAEGALPVLGHR	13	A0A3B5ZZG7	6-phosphogluconate dehydrogenase, decarboxylating OS=Triticum aestivum OX=4565 PE=3 SV=1	2W_2	3	421.239	0.027877	0.00033829	1	59.496	7273600
293	AAAEGALPVLGHR	13	A0A3B5ZZG7	6-phosphogluconate dehydrogenase, decarboxylating OS=Triticum aestivum OX=4565 PE=3 SV=1	0W_3	3	421.239	-0.44385	0.0015009	1	48.568	3929400
294	AAAEGALPVLGHR	13	A0A3B5ZZG7	6-phosphogluconate dehydrogenase, decarboxylating OS=Triticum aestivum OX=4565 PE=3 SV=1	2W_3	3	421.239	-0.49761	0.001561	1	48.115	8402300
295	AAAEHWGSPAAAAAFDADLVR	21	A0A3B6JGN8	Proteasome endopeptidase complex(predicted) OS=Triticum aestivum OX=4565 PE=4 SV=1	0W_1	3	699.676	-0.92207	0.00022307	1	56.708	7548200
296	AAAEHWGSPAAAAAFDADLVR	21	A0A3B6JGN8	Proteasome endopeptidase complex(predicted) OS=Triticum aestivum OX=4565 PE=4 SV=1	2W_1	3	699.676	-0.36264	5.5683e-09	1	86.748	93074000
297	AAAEHWGSPAAAAAFDADLVR	21	A0A3B6JGN8	Proteasome endopeptidase complex(predicted) OS=Triticum aestivum OX=4565 PE=4 SV=1	0W_2	3	699.676	-0.33703	0.00040498	1	42.123	10562000
298	AAAEHWGSPAAAAAFDADLVR	21	A0A3B6JGN8	Proteasome endopeptidase complex(predicted) OS=Triticum aestivum OX=4565 PE=4 SV=1	2W_2	3	699.676	-0.31227	1.0526e-09	1	88.176	93899000
299	AAAEHWGSPAAAAAFDADLVR	21	A0A3B6JGN8	Proteasome endopeptidase complex(predicted) OS=Triticum aestivum OX=4565 PE=4 SV=1	0W_3	3	699.676	-0.7376	0.00028524	1	47.499	6970400
300	AAAEHWGSPAAAAAFDADLVR	21	A0A3B6JGN8	Proteasome endopeptidase complex(predicted) OS=Triticum aestivum OX=4565 PE=4 SV=1	2W_3	3	699.676	-0.46993	1.1043e-12	1	91.589	89825000
301	AAAETYCQLLSSQSDNNVR	19	A0A077RSB4	Coatomer subunit beta OS=Triticum aestivum OX=4565 GN=TRAES_3BF035100020CFD_c1 PE=4 SV=1	0W_1	3	709.664	-1.0077	0.00021167	1	47.082	12719000
302	AAAETYCQLLSSQSDNNVR	19	A0A077RSB4	Coatomer subunit beta OS=Triticum aestivum OX=4565 GN=TRAES_3BF035100020CFD_c1 PE=4 SV=1	0W_1	2	1063.99	0.70046	0.025834	1	30.489	6375500
303	AAAETYCQLLSSQSDNNVR	19	A0A077RSB4	Coatomer subunit beta OS=Triticum aestivum OX=4565 GN=TRAES_3BF035100020CFD_c1 PE=4 SV=1	2W_1	3	709.664	-1.3366	1.0615e-08	1	84.94	23305000
304	AAAETYCQLLSSQSDNNVR	19	A0A077RSB4	Coatomer subunit beta OS=Triticum aestivum OX=4565 GN=TRAES_3BF035100020CFD_c1 PE=4 SV=1	2W_1	2	1063.99	0.12617	0.00025768	1	63.998	13831000
305	AAAETYCQLLSSQSDNNVR	19	A0A077RSB4	Coatomer subunit beta OS=Triticum aestivum OX=4565 GN=TRAES_3BF035100020CFD_c1 PE=4 SV=1	0W_2	3	709.664	-0.91298	2.7221e-08	1	78.501	12832000
306	AAAETYCQLLSSQSDNNVR	19	A0A077RSB4	Coatomer subunit beta OS=Triticum aestivum OX=4565 GN=TRAES_3BF035100020CFD_c1 PE=4 SV=1	0W_2	2	1063.99	-0.077186	0.0029175	1	41.513	6962800
307	AAAETYCQLLSSQSDNNVR	19	A0A077RSB4	Coatomer subunit beta OS=Triticum aestivum OX=4565 GN=TRAES_3BF035100020CFD_c1 PE=4 SV=1	2W_2	3	709.664	-1.3426	1.7039e-08	1	82.449	23719000
308	AAAETYCQLLSSQSDNNVR	19	A0A077RSB4	Coatomer subunit beta OS=Triticum aestivum OX=4565 GN=TRAES_3BF035100020CFD_c1 PE=4 SV=1	2W_2	2	1063.99	0.14495	1.842e-08	1	87.676	13646000
309	AAAETYCQLLSSQSDNNVR	19	A0A077RSB4	Coatomer subunit beta OS=Triticum aestivum OX=4565 GN=TRAES_3BF035100020CFD_c1 PE=4 SV=1	0W_3	2	1063.99	0.36132	0.046435	1	25.586	7738100
310	AAAETYCQLLSSQSDNNVR	19	A0A077RSB4	Coatomer subunit beta OS=Triticum aestivum OX=4565 GN=TRAES_3BF035100020CFD_c1 PE=4 SV=1	0W_3	3	709.664	-0.77329	1.7039e-08	1	82.449	12581000
311	AAAETYCQLLSSQSDNNVR	19	A0A077RSB4	Coatomer subunit beta OS=Triticum aestivum OX=4565 GN=TRAES_3BF035100020CFD_c1 PE=4 SV=1	2W_3	2	1063.99	0.38505	0.0010707	1	47.68	13908000
312	AAAETYCQLLSSQSDNNVR	19	A0A077RSB4	Coatomer subunit beta OS=Triticum aestivum OX=4565 GN=TRAES_3BF035100020CFD_c1 PE=4 SV=1	2W_3	3	709.664	-1.4136	9.2923e-12	1	107.62	24741000
313	AAAEVVFDPSVSGPR	15	W5CRM7	Deneddylase BPLF1(predicted) OS=Triticum aestivum OX=4565 GN=TRAES_3BF017100070CFD_c1 PE=4 SV=1	0W_1	2	751.386	0.023435	0.0018811	1	52.527	20086000
314	AAAEVVFDPSVSGPR	15	W5CRM7	Deneddylase BPLF1(predicted) OS=Triticum aestivum OX=4565 GN=TRAES_3BF017100070CFD_c1 PE=4 SV=1	2W_1	2	751.386	-0.20108	9.46e-05	1	81.632	42499000
315	AAAEVVFDPSVSGPR	15	W5CRM7	Deneddylase BPLF1(predicted) OS=Triticum aestivum OX=4565 GN=TRAES_3BF017100070CFD_c1 PE=4 SV=1	0W_2	2	751.386		0.0061037	1	44.925	0
316	AAAEVVFDPSVSGPR	15	W5CRM7	Deneddylase BPLF1(predicted) OS=Triticum aestivum OX=4565 GN=TRAES_3BF017100070CFD_c1 PE=4 SV=1	2W_2	2	751.386	-0.18107	0.00010149	1	74.789	46825000
317	AAAEVVFDPSVSGPR	15	W5CRM7	Deneddylase BPLF1(predicted) OS=Triticum aestivum OX=4565 GN=TRAES_3BF017100070CFD_c1 PE=4 SV=1	2W_3	2	751.386	-0.14381	0.00073618	1	57.288	49012000
318	AAAEVVFDPSVSGPR	15	W5CRM7	Deneddylase BPLF1(predicted) OS=Triticum aestivum OX=4565 GN=TRAES_3BF017100070CFD_c1 PE=4 SV=1	0W_2	2	751.386	0.10078	NaN	0		14510000
319	AAAEVVFDPSVSGPR	15	W5CRM7	Deneddylase BPLF1(predicted) OS=Triticum aestivum OX=4565 GN=TRAES_3BF017100070CFD_c1 PE=4 SV=1	0W_3	2	751.386	0.59915	NaN	0		17133000
320	AAAEVVFDPSVSGPR	15	W5CRM7	Deneddylase BPLF1(predicted) OS=Triticum aestivum OX=4565 GN=TRAES_3BF017100070CFD_c1 PE=4 SV=1	2W_3	2	751.386	-0.39852	NaN	0		5642900
321	AAAEYDLPLVGNK	13	A0A3B6B0I4	Thioredoxin domain-containing protein OS=Triticum aestivum OX=4565 PE=4 SV=1	0W_1	2	680.859	-0.81984	0.0089191	1	46.88	14442000
322	AAAEYDLPLVGNK	13	A0A3B6B0I4	Thioredoxin domain-containing protein OS=Triticum aestivum OX=4565 PE=4 SV=1	2W_1	2	680.859	-0.27672	0.0031702	1	55.261	18530000
323	AAAEYDLPLVGNK	13	A0A3B6B0I4	Thioredoxin domain-containing protein OS=Triticum aestivum OX=4565 PE=4 SV=1	0W_2	2	680.859	-0.6135	0.00096298	1	64.121	17719000
324	AAAEYDLPLVGNK	13	A0A3B6B0I4	Thioredoxin domain-containing protein OS=Triticum aestivum OX=4565 PE=4 SV=1	2W_2	2	680.859	-0.51524	0.0031702	1	55.261	35731000
325	AAAEYDLPLVGNK	13	A0A3B6B0I4	Thioredoxin domain-containing protein OS=Triticum aestivum OX=4565 PE=4 SV=1	0W_3	2	680.859	-1.1521	0.0031702	1	55.261	15557000
326	AAAEYDLPLVGNK	13	A0A3B6B0I4	Thioredoxin domain-containing protein OS=Triticum aestivum OX=4565 PE=4 SV=1	2W_3	2	680.859	-0.19695	0.0001066	1	89.301	24723000
327	AAAFCSPACAAASHPR	16	A0A3B6RMB5	SET domain-containing protein OS=Triticum aestivum OX=4565 PE=4 SV=1	2W_1	3	548.917	-1.292	0.0021661	1	38.808	2386300
328	AAAFCSPACAAASHPR	16	A0A3B6RMB5	SET domain-containing protein OS=Triticum aestivum OX=4565 PE=4 SV=1	2W_2	3	548.917	-0.90278	NaN	0		2491400
329	AAAFCSPACAAASHPR	16	A0A3B6RMB5	SET domain-containing protein OS=Triticum aestivum OX=4565 PE=4 SV=1	0W_3	3	548.917	-0.85063	NaN	0		1481800
330	AAAFCSPACAAASHPR	16	A0A3B6RMB5	SET domain-containing protein OS=Triticum aestivum OX=4565 PE=4 SV=1	2W_3	3	548.917	-0.77068	NaN	0		2431400
331	AAAFCSPACAAASHPR	16	A0A3B6RMB5	SET domain-containing protein OS=Triticum aestivum OX=4565 PE=4 SV=1	2W_3	3	548.917	-2.7948	NaN	0		1815800
332	AAAFLELANYR	11	A0A3B6HWA6	TPR_REGION domain-containing protein OS=Triticum aestivum OX=4565 PE=4 SV=1	0W_1	2	619.83	0.35565	9.166e-08	1	115.78	36695000
333	AAAFLELANYR	11	A0A3B6HWA6	TPR_REGION domain-containing protein OS=Triticum aestivum OX=4565 PE=4 SV=1	0W_1	2	619.83	-0.56321	0.00034431	1	91.549	9983300
334	AAAFLELANYR	11	A0A3B6HWA6	TPR_REGION domain-containing protein OS=Triticum aestivum OX=4565 PE=4 SV=1	2W_1	2	619.83	0.63193	2.5954e-08	1	139.43	88196000
335	AAAFLELANYR	11	A0A3B6HWA6	TPR_REGION domain-containing protein OS=Triticum aestivum OX=4565 PE=4 SV=1	0W_2	2	619.83	0.12984	1.8452e-06	1	108.43	35724000
336	AAAFLELANYR	11	A0A3B6HWA6	TPR_REGION domain-containing protein OS=Triticum aestivum OX=4565 PE=4 SV=1	2W_2	2	619.83	0.4762	1.2216e-09	1	151.22	102280000
337	AAAFLELANYR	11	A0A3B6HWA6	TPR_REGION domain-containing protein OS=Triticum aestivum OX=4565 PE=4 SV=1	0W_3	2	619.83	0.24246	2.9884e-06	1	107.55	30206000
338	AAAFLELANYR	11	A0A3B6HWA6	TPR_REGION domain-containing protein OS=Triticum aestivum OX=4565 PE=4 SV=1	0W_3	2	619.83	0.78779	0.0046844	1	61.344	7622400
339	AAAFLELANYR	11	A0A3B6HWA6	TPR_REGION domain-containing protein OS=Triticum aestivum OX=4565 PE=4 SV=1	2W_3	2	619.83	0.67597	8.0849e-08	1	125.75	103340000
340	AAAFLQLVK	9	A0A3B6MMF5	TPR_REGION domain-containing protein OS=Triticum aestivum OX=4565 PE=4 SV=1	0W_1	2	480.797	0.7469	0.0065108	1	69.628	5221900
341	AAAFLQLVK	9	A0A3B6MMF5	TPR_REGION domain-containing protein OS=Triticum aestivum OX=4565 PE=4 SV=1	2W_1	2	480.797	0.42166	0.011518	1	63.419	10485000
342	AAAFLQLVK	9	A0A3B6MMF5	TPR_REGION domain-containing protein OS=Triticum aestivum OX=4565 PE=4 SV=1	0W_2	2	480.797	0.3884	0.049429	1	47.869	4718100
343	AAAFLQLVK	9	A0A3B6MMF5	TPR_REGION domain-containing protein OS=Triticum aestivum OX=4565 PE=4 SV=1	2W_2	2	480.797	-0.26127	0.011518	1	63.419	11501000
344	AAAFLQLVK	9	A0A3B6MMF5	TPR_REGION domain-containing protein OS=Triticum aestivum OX=4565 PE=4 SV=1	0W_3	2	480.797	0.3156	0.054757	1	46.334	6284000
345	AAAFLQLVK	9	A0A3B6MMF5	TPR_REGION domain-containing protein OS=Triticum aestivum OX=4565 PE=4 SV=1	2W_3	2	480.797	-0.18019	0.011518	1	63.419	13099000
346	AAAFQVVR	8	A0A3B5ZND4	MAP kinase phosphatase(predicted) OS=Triticum aestivum OX=4565 PE=4 SV=1	2W_3	2	431.251	1.1251	0.043081	1	58.917	7810700
347	AAAFQVVR	8	A0A3B5ZND4	MAP kinase phosphatase(predicted) OS=Triticum aestivum OX=4565 PE=4 SV=1	2W_1	2	431.251	2.037	NaN	0		4812200
348	AAAFQVVR	8	A0A3B5ZND4	MAP kinase phosphatase(predicted) OS=Triticum aestivum OX=4565 PE=4 SV=1	2W_2	2	431.251	1.3974	NaN	0		7623600
349	AAAFSAAR	8	A0A3B6AV72	Pentatricopeptide repeat-containing protein(predicted) OS=Triticum aestivum OX=4565 PE=4 SV=1	2W_1	2	382.706	0.44737	0.023293	1	73.665	5111000
350	AAAFSAAR	8	A0A3B6AV72	Pentatricopeptide repeat-containing protein(predicted) OS=Triticum aestivum OX=4565 PE=4 SV=1	2W_2	2	382.706	0.95089	0.023293	1	73.665	5674200
351	AAAFSAAR	8	A0A3B6AV72	Pentatricopeptide repeat-containing protein(predicted) OS=Triticum aestivum OX=4565 PE=4 SV=1	0W_3	2	382.706	0.77659	0.017232	1	81.296	4648300
352	AAAFSAAR	8	A0A3B6AV72	Pentatricopeptide repeat-containing protein(predicted) OS=Triticum aestivum OX=4565 PE=4 SV=1	0W_1	2	382.706	-1.0727	NaN	0		1205100
353	AAAFSAAR	8	A0A3B6AV72	Pentatricopeptide repeat-containing protein(predicted) OS=Triticum aestivum OX=4565 PE=4 SV=1	0W_2	2	382.706	0.79181	NaN	0		4296800
354	AAAFSAAR	8	A0A3B6AV72	Pentatricopeptide repeat-containing protein(predicted) OS=Triticum aestivum OX=4565 PE=4 SV=1	2W_3	2	382.706	0.6603	NaN	0		7338800
355	AAAGAGGGLFAMPDPK	16	A0A3B6IK77	Calcium load-activated calcium channel OS=Triticum aestivum OX=4565 PE=3 SV=1	2W_1	2	715.858	-1.9029	0.0020525	1	46.89	10820000
356	AAAGAGGGLFAMPDPK	16	A0A3B6IK77	Calcium load-activated calcium channel OS=Triticum aestivum OX=4565 PE=3 SV=1	2W_2	2	715.858	-1.1889	0.0010194	1	52.372	9229300
357	AAAGAGGGLFAMPDPK	16	A0A3B6IK77	Calcium load-activated calcium channel OS=Triticum aestivum OX=4565 PE=3 SV=1	0W_3	2	715.858	-1.3971	0.00039961	1	55.66	6769200
358	AAAGAGGGLFAMPDPK	16	A0A3B6IK77	Calcium load-activated calcium channel OS=Triticum aestivum OX=4565 PE=3 SV=1	2W_3	2	715.858	-1.0519	0.0015427	1	49.595	9513000
359	AAAGAGGGLFAMPDPK	16	A0A3B6IK77	Calcium load-activated calcium channel OS=Triticum aestivum OX=4565 PE=3 SV=1	0W_1	2	715.858	-1.0184	NaN	0		8170800
360	AAAGAGGGLFAMPDPK	16	A0A3B6IK77	Calcium load-activated calcium channel OS=Triticum aestivum OX=4565 PE=3 SV=1	0W_2	2	715.858	-0.78634	NaN	0		7718900
361	AAAGAGGGLFAMPDPK	16	A0A3B6IK77	Calcium load-activated calcium channel OS=Triticum aestivum OX=4565 PE=3 SV=1	0W_3	2	715.858	-4.866	NaN	0		4041800
362	AAAGAGGGLFAMPDPK	16	A0A3B6IK77	Calcium load-activated calcium channel OS=Triticum aestivum OX=4565 PE=3 SV=1	2W_3	2	715.858	-4.8374	NaN	0		14073000
363	AAAGELKPVFNEIESR	16	A0A3B6SFF0	Conserved oligomeric Golgi complex subunit 3(predicted) OS=Triticum aestivum OX=4565 PE=4 SV=1	0W_1	3	577.641	-0.41125	7.2254e-05	1	59.673	9281100
364	AAAGELKPVFNEIESR	16	A0A3B6SFF0	Conserved oligomeric Golgi complex subunit 3(predicted) OS=Triticum aestivum OX=4565 PE=4 SV=1	2W_1	3	577.641	0.68334	1.7422e-05	1	88.561	14290000
365	AAAGELKPVFNEIESR	16	A0A3B6SFF0	Conserved oligomeric Golgi complex subunit 3(predicted) OS=Triticum aestivum OX=4565 PE=4 SV=1	0W_2	3	577.641	0.40104	5.0961e-05	1	62.861	10655000
366	AAAGELKPVFNEIESR	16	A0A3B6SFF0	Conserved oligomeric Golgi complex subunit 3(predicted) OS=Triticum aestivum OX=4565 PE=4 SV=1	2W_2	3	577.641	0.38186	0.00081674	1	47.548	12131000
367	AAAGELKPVFNEIESR	16	A0A3B6SFF0	Conserved oligomeric Golgi complex subunit 3(predicted) OS=Triticum aestivum OX=4565 PE=4 SV=1	0W_3	3	577.641	-0.03766	0.0002211	1	55.011	9507300
368	AAAGELKPVFNEIESR	16	A0A3B6SFF0	Conserved oligomeric Golgi complex subunit 3(predicted) OS=Triticum aestivum OX=4565 PE=4 SV=1	2W_3	3	577.641	0.17911	8.9116e-05	1	57.148	16831000
369	AAAGGATTSIR	11	A0A3B6PW49	DEAD-box ATP-dependent RNA helicase 34(predicted) OS=Triticum aestivum OX=4565 PE=3 SV=1	0W_1	2	509.27	0.35133	3.1455e-08	1	130.01	86546000
370	AAAGGATTSIR	11	A0A3B6PW49	DEAD-box ATP-dependent RNA helicase 34(predicted) OS=Triticum aestivum OX=4565 PE=3 SV=1	2W_1	2	509.27	-0.64726	0.00058808	1	78.342	181550000
371	AAAGGATTSIR	11	A0A3B6PW49	DEAD-box ATP-dependent RNA helicase 34(predicted) OS=Triticum aestivum OX=4565 PE=3 SV=1	0W_2	2	509.27	-0.61055	0.0024511	1	59.198	105650000
372	AAAGGATTSIR	11	A0A3B6PW49	DEAD-box ATP-dependent RNA helicase 34(predicted) OS=Triticum aestivum OX=4565 PE=3 SV=1	2W_2	2	509.27	-0.841	0.0025168	1	58.829	171870000
373	AAAGGATTSIR	11	A0A3B6PW49	DEAD-box ATP-dependent RNA helicase 34(predicted) OS=Triticum aestivum OX=4565 PE=3 SV=1	0W_3	2	509.27	-0.18134	0.0073362	1	50.484	91596000
374	AAAGGATTSIR	11	A0A3B6PW49	DEAD-box ATP-dependent RNA helicase 34(predicted) OS=Triticum aestivum OX=4565 PE=3 SV=1	2W_3	2	509.27	-1.0519	0.0022358	1	61.344	149270000
375	AAAGGEAAAAALAAAK	16	A0A3B6MWD6	Magnesium transporter OS=Triticum aestivum OX=4565 PE=3 SV=1	0W_1	2	663.854	-4.2468	8.1435e-05	1	57.414	9434000
376	AAAGGEAAAAALAAAK	16	A0A3B6MWD6	Magnesium transporter OS=Triticum aestivum OX=4565 PE=3 SV=1	0W_2	2	663.854	-3.3789	0.00033344	1	53.3	7129500000
377	AAAGGEAAAAALAAAK	16	A0A3B6MWD6	Magnesium transporter OS=Triticum aestivum OX=4565 PE=3 SV=1	0W_3	2	663.854	-4.2308	1.8938e-05	1	68.168	9423600
378	AAAGGEAAAAALAAAK	16	A0A3B6MWD6	Magnesium transporter OS=Triticum aestivum OX=4565 PE=3 SV=1	2W_3	2	663.854	-3.6232	0.00051903	1	50.806	9093100
379	AAAGLANLETK	11	A0A3B6KS35	PCI domain-containing protein OS=Triticum aestivum OX=4565 PE=4 SV=1	0W_1	2	529.796		0.00017359	1	75.819	0
380	AAAGLANLETK	11	A0A3B6KS35	PCI domain-containing protein OS=Triticum aestivum OX=4565 PE=4 SV=1	2W_1	2	529.796	0.54123	0.0034412	1	65.348	22962000
381	AAAGLANLETK	11	A0A3B6KS35	PCI domain-containing protein OS=Triticum aestivum OX=4565 PE=4 SV=1	0W_2	2	529.796		5.1198e-06	1	83.045	0
382	AAAGLANLETK	11	A0A3B6KS35	PCI domain-containing protein OS=Triticum aestivum OX=4565 PE=4 SV=1	2W_2	2	529.796	1.0902	0.001955	1	73.632	25904000
383	AAAGLANLETK	11	A0A3B6KS35	PCI domain-containing protein OS=Triticum aestivum OX=4565 PE=4 SV=1	0W_3	2	529.796	1.275	6.2181e-05	1	75.819	13740000
384	AAAGLANLETK	11	A0A3B6KS35	PCI domain-containing protein OS=Triticum aestivum OX=4565 PE=4 SV=1	2W_3	2	529.796	0.19638	0.0071175	1	57.175	28501000
385	AAAGLANLETK	11	A0A3B6KS35	PCI domain-containing protein OS=Triticum aestivum OX=4565 PE=4 SV=1	2W_2	2	529.796	-0.11993	NaN	0		3827100
386	AAAGLGAAASLLSASLYTVDGGER	24	A0A3B6C8B0	PHB domain-containing protein OS=Triticum aestivum OX=4565 PE=4 SV=1	0W_1	3	741.053	-0.57844	4.2339e-05	1	49.125	4154800
387	AAAGLGAAASLLSASLYTVDGGER	24	A0A3B6C8B0	PHB domain-containing protein OS=Triticum aestivum OX=4565 PE=4 SV=1	2W_1	3	741.053	0.94537	5.5482e-28	1	120.23	34285000
388	AAAGLGAAASLLSASLYTVDGGER	24	A0A3B6C8B0	PHB domain-containing protein OS=Triticum aestivum OX=4565 PE=4 SV=1	0W_2	3	741.053	-0.40257	0.0005961	1	32.548	3372900
389	AAAGLGAAASLLSASLYTVDGGER	24	A0A3B6C8B0	PHB domain-containing protein OS=Triticum aestivum OX=4565 PE=4 SV=1	2W_2	3	741.053	0.65147	1.2935e-31	1	122.19	29710000
390	AAAGLGAAASLLSASLYTVDGGER	24	A0A3B6C8B0	PHB domain-containing protein OS=Triticum aestivum OX=4565 PE=4 SV=1	2W_3	3	741.053	0.77538	9.4565e-21	1	105.06	24779000
391	AAAGLGAAASLLSASLYTVDGGER	24	A0A3B6C8B0	PHB domain-containing protein OS=Triticum aestivum OX=4565 PE=4 SV=1	0W_3	3	741.053	-0.39908	NaN	0		4791700
392	AAAGPAHPAYFEMIK	15	A0A3B6DHQ8	H15 domain-containing protein OS=Triticum aestivum OX=4565 PE=3 SV=1	0W_1	3	525.266	-0.48314	0.038289	1	22.855	733990000
393	AAAGPAHPAYFEMIK	15	A0A3B6DHQ8	H15 domain-containing protein OS=Triticum aestivum OX=4565 PE=3 SV=1	0W_1	2	787.395	0.89635	0.00011059	1	83.204	105920000
394	AAAGPAHPAYFEMIK	15	A0A3B6DHQ8	H15 domain-containing protein OS=Triticum aestivum OX=4565 PE=3 SV=1	2W_1	3	525.266	-0.46273	0.0034786	1	36.993	482100000
395	AAAGPAHPAYFEMIK	15	A0A3B6DHQ8	H15 domain-containing protein OS=Triticum aestivum OX=4565 PE=3 SV=1	2W_1	2	787.395	0.95174	0.00013749	1	72.321	120920000
396	AAAGPAHPAYFEMIK	15	A0A3B6DHQ8	H15 domain-containing protein OS=Triticum aestivum OX=4565 PE=3 SV=1	0W_2	3	525.266	-0.4291	0.0012792	1	44.132	738810000
397	AAAGPAHPAYFEMIK	15	A0A3B6DHQ8	H15 domain-containing protein OS=Triticum aestivum OX=4565 PE=3 SV=1	0W_2	2	787.395	0.82537	4.1765e-13	1	122.97	146960000
398	AAAGPAHPAYFEMIK	15	A0A3B6DHQ8	H15 domain-containing protein OS=Triticum aestivum OX=4565 PE=3 SV=1	2W_2	3	525.266	-0.40233	0.00045403	1	50.806	507740000
399	AAAGPAHPAYFEMIK	15	A0A3B6DHQ8	H15 domain-containing protein OS=Triticum aestivum OX=4565 PE=3 SV=1	2W_2	2	787.395	1.4059	2.4371e-13	1	126.32	78032000
400	AAAGPAHPAYFEMIK	15	A0A3B6DHQ8	H15 domain-containing protein OS=Triticum aestivum OX=4565 PE=3 SV=1	0W_3	3	525.266	-0.22166	0.0030647	1	38.337	645230000
401	AAAGPAHPAYFEMIK	15	A0A3B6DHQ8	H15 domain-containing protein OS=Triticum aestivum OX=4565 PE=3 SV=1	0W_3	2	787.395	1.044	3.3738e-13	1	124.51	113580000
402	AAAGPAHPAYFEMIK	15	A0A3B6DHQ8	H15 domain-containing protein OS=Triticum aestivum OX=4565 PE=3 SV=1	2W_3	3	525.266	-0.30315	0.0017758	1	42.52	518170000
403	AAAGPAHPAYFEMIK	15	A0A3B6DHQ8	H15 domain-containing protein OS=Triticum aestivum OX=4565 PE=3 SV=1	2W_3	2	787.395	1.6048	5.7432e-28	1	149.82	67188000
404	AAAGPAHPAYFEMIK	15	A0A3B6DHQ8	H15 domain-containing protein OS=Triticum aestivum OX=4565 PE=3 SV=1	2W_3	3	525.266	-3.3919	NaN	0		2641500
405	AAAGPAHPAYFEMIK	15	A0A3B6DHQ8	H15 domain-containing protein OS=Triticum aestivum OX=4565 PE=3 SV=1	2W_1	2	795.393	0.15565	0.00025784	1	58.32	13463000
406	AAAGPAHPAYFEMIK	15	A0A3B6DHQ8	H15 domain-containing protein OS=Triticum aestivum OX=4565 PE=3 SV=1	0W_2	2	795.393	-0.055848	0.001121	1	48.532	11646000
407	AAAGPAHPAYFEMIK	15	A0A3B6DHQ8	H15 domain-containing protein OS=Triticum aestivum OX=4565 PE=3 SV=1	2W_2	2	795.393	-0.44517	0.00013407	1	64.534	10331000
408	AAAGPAHPAYFEMIK	15	A0A3B6DHQ8	H15 domain-containing protein OS=Triticum aestivum OX=4565 PE=3 SV=1	0W_3	2	795.393	-0.50401	0.00021714	1	60.364	11711000
409	AAAGPAHPAYFEMIK	15	A0A3B6DHQ8	H15 domain-containing protein OS=Triticum aestivum OX=4565 PE=3 SV=1	2W_3	2	795.393	-0.50854	0.0009615	1	50.088	16910000
410	AAAGPAHPAYFEMIK	15	A0A3B6DHQ8	H15 domain-containing protein OS=Triticum aestivum OX=4565 PE=3 SV=1	2W_3	2	795.393	0.59025	0.0002175	1	60.345	10381000
411	AAAGPAHPAYFEMIK	15	A0A3B6DHQ8	H15 domain-containing protein OS=Triticum aestivum OX=4565 PE=3 SV=1	2W_1	2	795.393	-0.24444	NaN	0		8974700
412	AAAGPAHPAYFEMIK	15	A0A3B6DHQ8	H15 domain-containing protein OS=Triticum aestivum OX=4565 PE=3 SV=1	0W_2	2	795.393	0.46806	NaN	0		10749000
413	AAAGPAHPAYFEMIK	15	A0A3B6DHQ8	H15 domain-containing protein OS=Triticum aestivum OX=4565 PE=3 SV=1	2W_2	2	795.393	-0.8828	NaN	0		2444000
414	AAAGPAHPAYFEMIK	15	A0A3B6DHQ8	H15 domain-containing protein OS=Triticum aestivum OX=4565 PE=3 SV=1	2W_2	2	795.393	-1.4944	NaN	0		3124500
415	AAAGPGNEGKPLVVR	15	A0A3B5Y4F9	Cytochrome P450(predicted) OS=Triticum aestivum OX=4565 PE=3 SV=1	0W_1	3	479.272	0.57154	4.1372e-09	1	115.12	20036000
416	AAAGPGNEGKPLVVR	15	A0A3B5Y4F9	Cytochrome P450(predicted) OS=Triticum aestivum OX=4565 PE=3 SV=1	2W_1	3	479.272	0.42022	6.3694e-05	1	89.507	28863000
417	AAAGPGNEGKPLVVR	15	A0A3B5Y4F9	Cytochrome P450(predicted) OS=Triticum aestivum OX=4565 PE=3 SV=1	0W_2	3	479.272	0.57385	6.2511e-09	1	112.42	17573000
418	AAAGPGNEGKPLVVR	15	A0A3B5Y4F9	Cytochrome P450(predicted) OS=Triticum aestivum OX=4565 PE=3 SV=1	2W_2	2	718.404	-0.61916	0.00092504	1	70.373	5938500
419	AAAGPGNEGKPLVVR	15	A0A3B5Y4F9	Cytochrome P450(predicted) OS=Triticum aestivum OX=4565 PE=3 SV=1	2W_2	3	479.272	0.61778	6.6913e-05	1	87.863	26753000
420	AAAGPGNEGKPLVVR	15	A0A3B5Y4F9	Cytochrome P450(predicted) OS=Triticum aestivum OX=4565 PE=3 SV=1	0W_3	3	479.272	0.40974	3.9733e-06	1	102.52	15876000
421	AAAGPGNEGKPLVVR	15	A0A3B5Y4F9	Cytochrome P450(predicted) OS=Triticum aestivum OX=4565 PE=3 SV=1	2W_3	2	718.404	1.669	0.0026362	1	62.287	3786700
422	AAAGPGNEGKPLVVR	15	A0A3B5Y4F9	Cytochrome P450(predicted) OS=Triticum aestivum OX=4565 PE=3 SV=1	2W_3	3	479.272	0.46602	1.691e-09	1	118.24	28228000
423	AAAGPGNEGKPLVVR	15	A0A3B5Y4F9	Cytochrome P450(predicted) OS=Triticum aestivum OX=4565 PE=3 SV=1	0W_1	2	718.404	1.334	NaN	0		4696000
424	AAAGPGNEGKPLVVR	15	A0A3B5Y4F9	Cytochrome P450(predicted) OS=Triticum aestivum OX=4565 PE=3 SV=1	2W_1	2	718.404	1.0116	NaN	0		3359000
425	AAAGPGNEGKPLVVR	15	A0A3B5Y4F9	Cytochrome P450(predicted) OS=Triticum aestivum OX=4565 PE=3 SV=1	0W_2	2	718.404	-3.6004	NaN	0		3428200
426	AAAGPGNEGKPLVVR	15	A0A3B5Y4F9	Cytochrome P450(predicted) OS=Triticum aestivum OX=4565 PE=3 SV=1	0W_3	2	718.404	1.9959	NaN	0		1409700
427	AAAHMATVAAFLS	13	A0A3B6LTW1	Abhydrolase_3 domain-containing protein OS=Triticum aestivum OX=4565 PE=4 SV=1	0W_1	2	630.824	0.053806	0.00017067	1	78.342	10233000
428	AAAHMATVAAFLS	13	A0A3B6LTW1	Abhydrolase_3 domain-containing protein OS=Triticum aestivum OX=4565 PE=4 SV=1	2W_1	2	630.824		2.782e-10	1	90.05	0
429	AAAHMATVAAFLS	13	A0A3B6LTW1	Abhydrolase_3 domain-containing protein OS=Triticum aestivum OX=4565 PE=4 SV=1	0W_2	2	630.824	0.22458	0.00037119	1	69.721	11210000
430	AAAHMATVAAFLS	13	A0A3B6LTW1	Abhydrolase_3 domain-containing protein OS=Triticum aestivum OX=4565 PE=4 SV=1	2W_2	2	630.824	2.0815	0.000624	1	59.418	1523300
431	AAAHMATVAAFLS	13	A0A3B6LTW1	Abhydrolase_3 domain-containing protein OS=Triticum aestivum OX=4565 PE=4 SV=1	2W_2	2	630.824	0.18708	1.1302e-05	1	100.88	30810000
432	AAAHMATVAAFLS	13	A0A3B6LTW1	Abhydrolase_3 domain-containing protein OS=Triticum aestivum OX=4565 PE=4 SV=1	0W_3	2	630.824		9.2435e-05	1	76.332	0
433	AAAHMATVAAFLS	13	A0A3B6LTW1	Abhydrolase_3 domain-containing protein OS=Triticum aestivum OX=4565 PE=4 SV=1	2W_3	2	630.824	0.17504	0.00011326	1	88.596	31574000
434	AAAHMATVAAFLS	13	A0A3B6LTW1	Abhydrolase_3 domain-containing protein OS=Triticum aestivum OX=4565 PE=4 SV=1	0W_1	2	630.824	-0.27239	NaN	0		1489100
435	AAAHMATVAAFLS	13	A0A3B6LTW1	Abhydrolase_3 domain-containing protein OS=Triticum aestivum OX=4565 PE=4 SV=1	0W_2	2	630.824	2.1308	NaN	0		836900
436	AAAHMATVAAFLS	13	A0A3B6LTW1	Abhydrolase_3 domain-containing protein OS=Triticum aestivum OX=4565 PE=4 SV=1	0W_3	2	630.824	-0.28477	NaN	0		641590
437	AAAHMATVAAFLS	13	A0A3B6LTW1	Abhydrolase_3 domain-containing protein OS=Triticum aestivum OX=4565 PE=4 SV=1	2W_3	2	630.824	1.7204	NaN	0		2043300
438	AAALAPGVSR	10	A0A3B6ITF8	Conserved oligomeric Golgi complex subunit 6 OS=Triticum aestivum OX=4565 PE=3 SV=1	0W_1	2	477.772	1.4062	0.015979	1	40.496	2888400
439	AAALAPGVSR	10	A0A3B6ITF8	Conserved oligomeric Golgi complex subunit 6 OS=Triticum aestivum OX=4565 PE=3 SV=1	2W_2	2	477.772		0.0015701	1	58.699	0
440	AAALAVLLAK	10	A0A3B6IU69	Peptidyl-prolyl cis-trans isomerase-like protein 2(predicted) OS=Triticum aestivum OX=4565 PE=4 SV=1	2W_2	2	470.813		0.0048657	1	62.463	0
441	AAALAVLLAK	10	A0A3B6IU69	Peptidyl-prolyl cis-trans isomerase-like protein 2(predicted) OS=Triticum aestivum OX=4565 PE=4 SV=1	0W_3	2	470.813		0.0048657	1	62.463	0
442	AAALAVLLAK	10	A0A3B6IU69	Peptidyl-prolyl cis-trans isomerase-like protein 2(predicted) OS=Triticum aestivum OX=4565 PE=4 SV=1	2W_3	2	470.813		0.003406	1	64.654	0
443	AAALAWR	7	A0A3B6TGF4	C2 domain-containing protein OS=Triticum aestivum OX=4565 PE=4 SV=1	0W_1	2	400.724		0.0068041	1	75.311	0
444	AAALAWR	7	A0A3B6TGF4	C2 domain-containing protein OS=Triticum aestivum OX=4565 PE=4 SV=1	0W_2	2	400.724	0.10442	0.025896	1	75.311	1947700
445	AAALAWR	7	A0A3B6TGF4	C2 domain-containing protein OS=Triticum aestivum OX=4565 PE=4 SV=1	0W_3	2	400.724	-0.15244	0.023841	1	77.748	1126400
446	AAALAWR	7	A0A3B6TGF4	C2 domain-containing protein OS=Triticum aestivum OX=4565 PE=4 SV=1	2W_3	2	400.724	-0.51815	0.013981	1	97.596	4036200
447	AAALAWR	7	A0A3B6TGF4	C2 domain-containing protein OS=Triticum aestivum OX=4565 PE=4 SV=1	2W_1	2	400.724	-0.70029	NaN	0		2594200
448	AAALAWR	7	A0A3B6TGF4	C2 domain-containing protein OS=Triticum aestivum OX=4565 PE=4 SV=1	2W_2	2	400.724	-0.60907	NaN	0		2180400
449	AAALLCR	7	Q6KCK6	Putative calcium-dependent protein kinase OS=Triticum aestivum OX=4565 GN=cdpk1 PE=2 SV=1	0W_1	2	387.718		0.013529	1	102.98	0
450	AAALLCR	7	Q6KCK6	Putative calcium-dependent protein kinase OS=Triticum aestivum OX=4565 GN=cdpk1 PE=2 SV=1	2W_1	2	387.718	-1.6205	0.031408	1	102.98	21176000
451	AAALLCR	7	Q6KCK6	Putative calcium-dependent protein kinase OS=Triticum aestivum OX=4565 GN=cdpk1 PE=2 SV=1	0W_2	2	387.718		0.013529	1	102.98	0
452	AAALLCR	7	Q6KCK6	Putative calcium-dependent protein kinase OS=Triticum aestivum OX=4565 GN=cdpk1 PE=2 SV=1	2W_2	2	387.718	-0.95796	0.031408	1	102.98	19634000
453	AAALLCR	7	Q6KCK6	Putative calcium-dependent protein kinase OS=Triticum aestivum OX=4565 GN=cdpk1 PE=2 SV=1	0W_3	2	387.718		0.013529	1	102.98	0
454	AAALLCR	7	Q6KCK6	Putative calcium-dependent protein kinase OS=Triticum aestivum OX=4565 GN=cdpk1 PE=2 SV=1	2W_3	2	387.718		0.013529	1	102.98	0
455	AAALLTPTQR	10	A0A3B6U3M0	Expressed protein(predicted) OS=Triticum aestivum OX=4565 PE=4 SV=1	0W_2	2	542.311	0.049126	0.013464	1	50.353	1587900
456	AAALLTPTQR	10	A0A3B6U3M0	Expressed protein(predicted) OS=Triticum aestivum OX=4565 PE=4 SV=1	0W_1	2	542.311	-0.098203	NaN	0		1928500
457	AAALLTPTQR	10	A0A3B6U3M0	Expressed protein(predicted) OS=Triticum aestivum OX=4565 PE=4 SV=1	2W_1	2	542.311	0.19841	NaN	0		2868000
458	AAALLTPTQR	10	A0A3B6U3M0	Expressed protein(predicted) OS=Triticum aestivum OX=4565 PE=4 SV=1	2W_2	2	542.311	0.54003	NaN	0		3574000
459	AAALLTPTQR	10	A0A3B6U3M0	Expressed protein(predicted) OS=Triticum aestivum OX=4565 PE=4 SV=1	0W_3	2	542.311	-0.33213	NaN	0		1640500
460	AAALLTPTQR	10	A0A3B6U3M0	Expressed protein(predicted) OS=Triticum aestivum OX=4565 PE=4 SV=1	2W_3	2	542.311	-0.042396	NaN	0		2663400
461	AAALNHHAAAFPLPAGADLSR	21	A0A3B6SMF7	Nicalin OS=Triticum aestivum OX=4565 PE=3 SV=1	0W_1	3	691.033	1.0746	0.0017942	1	32.353	6432000
462	AAALNHHAAAFPLPAGADLSR	21	A0A3B6SMF7	Nicalin OS=Triticum aestivum OX=4565 PE=3 SV=1	2W_1	3	691.033	0.26545	0.00028157	1	48.053	8727900
463	AAALNHHAAAFPLPAGADLSR	21	A0A3B6SMF7	Nicalin OS=Triticum aestivum OX=4565 PE=3 SV=1	0W_2	3	691.033	0.28845	0.00057896	1	35.992	4258500
464	AAALNHHAAAFPLPAGADLSR	21	A0A3B6SMF7	Nicalin OS=Triticum aestivum OX=4565 PE=3 SV=1	2W_2	3	691.033	0.3391	0.00033354	1	44.641	9386700
465	AAALNHHAAAFPLPAGADLSR	21	A0A3B6SMF7	Nicalin OS=Triticum aestivum OX=4565 PE=3 SV=1	2W_2	4	518.526	0.5696	0.00020077	1	50.916	15901000
466	AAALNHHAAAFPLPAGADLSR	21	A0A3B6SMF7	Nicalin OS=Triticum aestivum OX=4565 PE=3 SV=1	0W_3	3	691.033	0.7093	0.00055255	1	36.923	5586700
467	AAALNHHAAAFPLPAGADLSR	21	A0A3B6SMF7	Nicalin OS=Triticum aestivum OX=4565 PE=3 SV=1	2W_3	3	691.033	0.6816	0.00052527	1	37.884	9102400
468	AAALNHHAAAFPLPAGADLSR	21	A0A3B6SMF7	Nicalin OS=Triticum aestivum OX=4565 PE=3 SV=1	2W_3	4	518.526	0.56167	0.00021242	1	48.616	15818000
469	AAALNHHAAAFPLPAGADLSR	21	A0A3B6SMF7	Nicalin OS=Triticum aestivum OX=4565 PE=3 SV=1	0W_1	4	518.526	0.26207	NaN	0		6693400
470	AAALNHHAAAFPLPAGADLSR	21	A0A3B6SMF7	Nicalin OS=Triticum aestivum OX=4565 PE=3 SV=1	2W_1	4	518.526	0.70759	NaN	0		14864000
471	AAALNHHAAAFPLPAGADLSR	21	A0A3B6SMF7	Nicalin OS=Triticum aestivum OX=4565 PE=3 SV=1	0W_2	4	518.526	-0.58483	NaN	0		6774800
472	AAALNHHAAAFPLPAGADLSR	21	A0A3B6SMF7	Nicalin OS=Triticum aestivum OX=4565 PE=3 SV=1	0W_3	4	518.526	-0.23971	NaN	0		7305500
473	AAALNIVPTSTGAAK	15	A0A3B6KSW8	Glyceraldehyde-3-phosphate dehydrogenase OS=Triticum aestivum OX=4565 PE=3 SV=1	2W_1	2	692.893	-0.029373	0.00018635	1	68.972	191800000
474	AAALNIVPTSTGAAK	15	A0A3B6KSW8	Glyceraldehyde-3-phosphate dehydrogenase OS=Triticum aestivum OX=4565 PE=3 SV=1	0W_3	2	692.893	-0.51313	0.00011556	1	83.692	157160000
475	AAALNIVPTSTGAAK	15	A0A3B6KSW8	Glyceraldehyde-3-phosphate dehydrogenase OS=Triticum aestivum OX=4565 PE=3 SV=1	0W_1	2	692.893	-0.3846	NaN	0		153100000
476	AAALNIVPTSTGAAK	15	A0A3B6KSW8	Glyceraldehyde-3-phosphate dehydrogenase OS=Triticum aestivum OX=4565 PE=3 SV=1	0W_2	2	692.893	-0.40245	NaN	0		165670000
477	AAALNIVPTSTGAAK	15	A0A3B6KSW8	Glyceraldehyde-3-phosphate dehydrogenase OS=Triticum aestivum OX=4565 PE=3 SV=1	2W_2	2	692.893	0.12841	NaN	0		205710000
478	AAALNIVPTSTGAAK	15	A0A3B6KSW8	Glyceraldehyde-3-phosphate dehydrogenase OS=Triticum aestivum OX=4565 PE=3 SV=1	2W_3	2	692.893	0.03883	NaN	0		228030000
479	AAALPGPVVLR	11	A0A3B5Y1E8	Expressed protein(predicted) OS=Triticum aestivum OX=4565 PE=4 SV=1	2W_1	2	532.335	-0.17686	0.002605	1	67.207	24854000
480	AAALPGPVVLR	11	A0A3B5Y1E8	Expressed protein(predicted) OS=Triticum aestivum OX=4565 PE=4 SV=1	2W_2	2	532.335	0.034443	0.0016033	1	77.192	21026000
481	AAALPGPVVLR	11	A0A3B5Y1E8	Expressed protein(predicted) OS=Triticum aestivum OX=4565 PE=4 SV=1	0W_3	2	532.335	-0.039258	0.0016985	1	76.228	18300000
482	AAALPGPVVLR	11	A0A3B5Y1E8	Expressed protein(predicted) OS=Triticum aestivum OX=4565 PE=4 SV=1	2W_3	2	532.335	-0.00016341	0.00079719	1	85.29	19700000
483	AAALPGPVVLR	11	A0A3B5Y1E8	Expressed protein(predicted) OS=Triticum aestivum OX=4565 PE=4 SV=1	0W_1	2	532.335	-0.2765	NaN	0		20193000
484	AAALPGPVVLR	11	A0A3B5Y1E8	Expressed protein(predicted) OS=Triticum aestivum OX=4565 PE=4 SV=1	0W_2	2	532.335	-0.6232	NaN	0		21245000
485	AAALPGPVVLR	11	A0A3B5Y1E8	Expressed protein(predicted) OS=Triticum aestivum OX=4565 PE=4 SV=1	2W_2	2	532.335	-3.0693	NaN	0		1983200
486	AAALPGPVVLR	11	A0A3B5Y1E8	Expressed protein(predicted) OS=Triticum aestivum OX=4565 PE=4 SV=1	2W_3	2	532.335	-4.1521	NaN	0		1055800
487	AAALPQFR	8	A0A3B6MZG5	ALA-interacting subunit OS=Triticum aestivum OX=4565 PE=3 SV=1	0W_1	2	437.251		0.027448	1	60.76	0
488	AAALPQFR	8	A0A3B6MZG5	ALA-interacting subunit OS=Triticum aestivum OX=4565 PE=3 SV=1	2W_1	2	437.251	-0.26624	0.026121	1	70.912	3777300
489	AAALPQFR	8	A0A3B6MZG5	ALA-interacting subunit OS=Triticum aestivum OX=4565 PE=3 SV=1	0W_2	2	437.251		0.0080464	1	81.784	0
490	AAALPQFR	8	A0A3B6MZG5	ALA-interacting subunit OS=Triticum aestivum OX=4565 PE=3 SV=1	2W_2	2	437.251	-0.53292	0.045448	1	58.981	3038100
491	AAALPQFR	8	A0A3B6MZG5	ALA-interacting subunit OS=Triticum aestivum OX=4565 PE=3 SV=1	0W_3	2	437.251		0.013902	1	67.032	0
492	AAALPQFR	8	A0A3B6MZG5	ALA-interacting subunit OS=Triticum aestivum OX=4565 PE=3 SV=1	2W_3	2	437.251	-0.22061	0.045448	1	58.981	3667400
493	AAALPQFR	8	A0A3B6MZG5	ALA-interacting subunit OS=Triticum aestivum OX=4565 PE=3 SV=1	0W_1	2	437.251	-0.29523	NaN	0		1199900
494	AAALPQFR	8	A0A3B6MZG5	ALA-interacting subunit OS=Triticum aestivum OX=4565 PE=3 SV=1	0W_2	2	437.251	-0.96081	NaN	0		1214100
495	AAALPQFR	8	A0A3B6MZG5	ALA-interacting subunit OS=Triticum aestivum OX=4565 PE=3 SV=1	0W_3	2	437.251	-0.94123	NaN	0		1244700
496	AAALPQFR	8	A0A3B6MZG5	ALA-interacting subunit OS=Triticum aestivum OX=4565 PE=3 SV=1	2W_3	2	437.251	-0.22061	NaN	0		3667400
497	AAALQAR	7	W5FYY9	Delta8-sphingolipid desaturase 2 OS=Triticum aestivum OX=4565 PE=4 SV=1	0W_1	2	350.709	1.1914	0.040412	1	92.692	723840
498	AAALQAR	7	W5FYY9	Delta8-sphingolipid desaturase 2 OS=Triticum aestivum OX=4565 PE=4 SV=1	0W_2	2	350.709	0.63555	0.057814	1	79.454	676720
499	AAALQAR	7	W5FYY9	Delta8-sphingolipid desaturase 2 OS=Triticum aestivum OX=4565 PE=4 SV=1	2W_1	2	350.709	0.20299	NaN	0		962620
500	AAALQAR	7	W5FYY9	Delta8-sphingolipid desaturase 2 OS=Triticum aestivum OX=4565 PE=4 SV=1	2W_2	2	350.709	0.098195	NaN	0		1043900
501	AAALQAR	7	W5FYY9	Delta8-sphingolipid desaturase 2 OS=Triticum aestivum OX=4565 PE=4 SV=1	0W_3	2	350.709	0.28747	NaN	0		919470
502	AAALQAR	7	W5FYY9	Delta8-sphingolipid desaturase 2 OS=Triticum aestivum OX=4565 PE=4 SV=1	2W_3	2	350.709	0.29851	NaN	0		917730
503	AAALQTALIK	10	A0A3B6INI3	Putative pre-mRNA-splicing factor ATP-dependent RNA helicase(predicted) OS=Triticum aestivum OX=4565 PE=4 SV=1	0W_1	2	500.313	0.30283	0.0026129	1	77.662	9589400
504	AAALQTALIK	10	A0A3B6INI3	Putative pre-mRNA-splicing factor ATP-dependent RNA helicase(predicted) OS=Triticum aestivum OX=4565 PE=4 SV=1	2W_1	2	500.313	0.51488	0.0027063	1	77.192	10574000
505	AAALQTALIK	10	A0A3B6INI3	Putative pre-mRNA-splicing factor ATP-dependent RNA helicase(predicted) OS=Triticum aestivum OX=4565 PE=4 SV=1	0W_2	2	500.313	0.39032	0.0026129	1	77.662	8625600
506	AAALQTALIK	10	A0A3B6INI3	Putative pre-mRNA-splicing factor ATP-dependent RNA helicase(predicted) OS=Triticum aestivum OX=4565 PE=4 SV=1	2W_2	2	500.313	0.51143	0.0026129	1	77.662	12703000
507	AAALQTALIK	10	A0A3B6INI3	Putative pre-mRNA-splicing factor ATP-dependent RNA helicase(predicted) OS=Triticum aestivum OX=4565 PE=4 SV=1	0W_3	2	500.313	0.2745	0.0026129	1	77.662	10136000
508	AAALQTALIK	10	A0A3B6INI3	Putative pre-mRNA-splicing factor ATP-dependent RNA helicase(predicted) OS=Triticum aestivum OX=4565 PE=4 SV=1	2W_3	2	500.313	0.41013	0.0045879	1	67.704	11518000
509	AAALQTALIK	10	A0A3B6INI3	Putative pre-mRNA-splicing factor ATP-dependent RNA helicase(predicted) OS=Triticum aestivum OX=4565 PE=4 SV=1	0W_1	2	500.313	-0.40227	NaN	0		4532700
510	AAALQTALIK	10	A0A3B6INI3	Putative pre-mRNA-splicing factor ATP-dependent RNA helicase(predicted) OS=Triticum aestivum OX=4565 PE=4 SV=1	2W_1	2	500.313	-0.91221	NaN	0		4273900
511	AAALQTALIK	10	A0A3B6INI3	Putative pre-mRNA-splicing factor ATP-dependent RNA helicase(predicted) OS=Triticum aestivum OX=4565 PE=4 SV=1	0W_2	2	500.313	-0.36607	NaN	0		5478300
512	AAALQTALIK	10	A0A3B6INI3	Putative pre-mRNA-splicing factor ATP-dependent RNA helicase(predicted) OS=Triticum aestivum OX=4565 PE=4 SV=1	0W_2	2	500.313	-0.64861	NaN	0		1760300
513	AAALQTALIK	10	A0A3B6INI3	Putative pre-mRNA-splicing factor ATP-dependent RNA helicase(predicted) OS=Triticum aestivum OX=4565 PE=4 SV=1	2W_2	2	500.313	0.51143	NaN	0		12703000
514	AAALQTALIK	10	A0A3B6INI3	Putative pre-mRNA-splicing factor ATP-dependent RNA helicase(predicted) OS=Triticum aestivum OX=4565 PE=4 SV=1	0W_3	2	500.313	0.2745	NaN	0		10136000
515	AAALQTALIK	10	A0A3B6INI3	Putative pre-mRNA-splicing factor ATP-dependent RNA helicase(predicted) OS=Triticum aestivum OX=4565 PE=4 SV=1	2W_3	2	500.313	0.41013	NaN	0		11518000
516	AAALTGLR	8	A0A3B6ED81	TPR_REGION domain-containing protein OS=Triticum aestivum OX=4565 PE=4 SV=1	0W_2	2	386.737	0.11259	0.010714	1	104.37	11194000
517	AAALVDKLQDNGVFFDHFK	19	A0A3B6PPK9	Peroxidase OS=Triticum aestivum OX=4565 PE=3 SV=1	2W_1	3	712.369	0.22311	3.9796e-08	1	82.01	21139000
518	AAALVDKLQDNGVFFDHFK	19	A0A3B6PPK9	Peroxidase OS=Triticum aestivum OX=4565 PE=3 SV=1	2W_2	3	712.369	0.42744	2.5695e-09	1	90.385	22003000
519	AAALVDKLQDNGVFFDHFK	19	A0A3B6PPK9	Peroxidase OS=Triticum aestivum OX=4565 PE=3 SV=1	2W_3	3	712.369	0.38551	2.9772e-06	1	76.586	26145000
520	AAALVDKLQDNGVFFDHFK	19	A0A3B6PPK9	Peroxidase OS=Triticum aestivum OX=4565 PE=3 SV=1	0W_1	3	712.369	-0.4005	NaN	0		5012500
521	AAALVDKLQDNGVFFDHFK	19	A0A3B6PPK9	Peroxidase OS=Triticum aestivum OX=4565 PE=3 SV=1	0W_2	3	712.369	0.23308	NaN	0		5430200
522	AAALVDKLQDNGVFFDHFK	19	A0A3B6PPK9	Peroxidase OS=Triticum aestivum OX=4565 PE=3 SV=1	0W_3	3	712.369	0.10581	NaN	0		4905300
523	AAAMVPDMTPFPANR	15	A0A3B6N0N7	Copper ion binding(predicted) OS=Triticum aestivum OX=4565 PE=4 SV=1	0W_1	2	794.884	-2.563	0.00037719	1	64.104	3748100
524	AAAMVPDMTPFPANR	15	A0A3B6N0N7	Copper ion binding(predicted) OS=Triticum aestivum OX=4565 PE=4 SV=1	0W_2	2	794.884	-2.4316	0.0033697	1	47.037	3584500
525	AAAMVPDMTPFPANR	15	A0A3B6N0N7	Copper ion binding(predicted) OS=Triticum aestivum OX=4565 PE=4 SV=1	0W_3	2	794.884	-1.6071	0.011698	1	40.941	3567500
526	AAANAPIAMR	10	A0A3B6JFL7	Clathrin heavy chain OS=Triticum aestivum OX=4565 PE=3 SV=1	0W_1	2	514.271	-0.55494	2.4244e-05	1	115.71	62535000
527	AAANAPIAMR	10	A0A3B6JFL7	Clathrin heavy chain OS=Triticum aestivum OX=4565 PE=3 SV=1	2W_1	2	514.271	0.36406	2.4217e-05	1	128.36	82042000
528	AAANAPIAMR	10	A0A3B6JFL7	Clathrin heavy chain OS=Triticum aestivum OX=4565 PE=3 SV=1	0W_2	2	514.271	-0.16493	4.045e-05	1	104.01	56812000
529	AAANAPIAMR	10	A0A3B6JFL7	Clathrin heavy chain OS=Triticum aestivum OX=4565 PE=3 SV=1	2W_2	2	514.271	0.67095	2.3194e-05	1	122.33	74621000
530	AAANAPIAMR	10	A0A3B6JFL7	Clathrin heavy chain OS=Triticum aestivum OX=4565 PE=3 SV=1	0W_3	2	514.271	-0.081562	2.4835e-05	1	113.71	66334000
531	AAANAPIAMR	10	A0A3B6JFL7	Clathrin heavy chain OS=Triticum aestivum OX=4565 PE=3 SV=1	2W_3	2	514.271	-0.15868	2.4217e-05	1	128.36	77323000
532	AAANAPIAMR	10	A0A3B6JFL7	Clathrin heavy chain OS=Triticum aestivum OX=4565 PE=3 SV=1	0W_1	2	522.269	-0.28177	0.010656	1	43.308	6451000
533	AAANAPIAMR	10	A0A3B6JFL7	Clathrin heavy chain OS=Triticum aestivum OX=4565 PE=3 SV=1	2W_1	2	522.269	3.6659	0.0033273	1	53.751	50172000
534	AAANAPIAMR	10	A0A3B6JFL7	Clathrin heavy chain OS=Triticum aestivum OX=4565 PE=3 SV=1	2W_1	2	522.269	-0.50996	0.0014306	1	61.78	9180200
535	AAANAPIAMR	10	A0A3B6JFL7	Clathrin heavy chain OS=Triticum aestivum OX=4565 PE=3 SV=1	0W_2	2	522.269	-0.8016	0.0033273	1	53.751	6018300
536	AAANAPIAMR	10	A0A3B6JFL7	Clathrin heavy chain OS=Triticum aestivum OX=4565 PE=3 SV=1	2W_2	2	522.269	3.8165	0.0023323	1	56.013	38356000
537	AAANAPIAMR	10	A0A3B6JFL7	Clathrin heavy chain OS=Triticum aestivum OX=4565 PE=3 SV=1	2W_2	2	522.269	-0.53852	0.0053905	1	49.06	13063000
538	AAANAPIAMR	10	A0A3B6JFL7	Clathrin heavy chain OS=Triticum aestivum OX=4565 PE=3 SV=1	0W_3	2	522.269	4.4569	0.002575	1	55.461	21580000
539	AAANAPIAMR	10	A0A3B6JFL7	Clathrin heavy chain OS=Triticum aestivum OX=4565 PE=3 SV=1	0W_3	2	522.269	-0.64797	0.0053905	1	49.06	7040700
540	AAANAPIAMR	10	A0A3B6JFL7	Clathrin heavy chain OS=Triticum aestivum OX=4565 PE=3 SV=1	2W_3	2	522.269	3.1234	0.0053905	1	49.06	79784000
541	AAANAPIAMR	10	A0A3B6JFL7	Clathrin heavy chain OS=Triticum aestivum OX=4565 PE=3 SV=1	2W_3	2	522.269	-1.1039	0.0033273	1	53.751	12561000
542	AAANAPIAMR	10	A0A3B6JFL7	Clathrin heavy chain OS=Triticum aestivum OX=4565 PE=3 SV=1	0W_1	2	522.269	4.8787	NaN	0		14002000
543	AAANAPIAMR	10	A0A3B6JFL7	Clathrin heavy chain OS=Triticum aestivum OX=4565 PE=3 SV=1	0W_1	2	522.269	0.11193	NaN	0		201210000
544	AAANAPIAMR	10	A0A3B6JFL7	Clathrin heavy chain OS=Triticum aestivum OX=4565 PE=3 SV=1	2W_1	2	522.269	0.73287	NaN	0		236940000
545	AAANAPIAMR	10	A0A3B6JFL7	Clathrin heavy chain OS=Triticum aestivum OX=4565 PE=3 SV=1	0W_2	2	522.269	5.1381	NaN	0		11869000
546	AAANAPIAMR	10	A0A3B6JFL7	Clathrin heavy chain OS=Triticum aestivum OX=4565 PE=3 SV=1	0W_2	2	522.269	0.41598	NaN	0		153000000
547	AAANAPIAMR	10	A0A3B6JFL7	Clathrin heavy chain OS=Triticum aestivum OX=4565 PE=3 SV=1	2W_2	2	522.269	0.42851	NaN	0		243620000
548	AAANAPIAMR	10	A0A3B6JFL7	Clathrin heavy chain OS=Triticum aestivum OX=4565 PE=3 SV=1	0W_3	2	522.269	0.49905	NaN	0		175610000
549	AAANAPIAMR	10	A0A3B6JFL7	Clathrin heavy chain OS=Triticum aestivum OX=4565 PE=3 SV=1	2W_3	2	522.269	0.31769	NaN	0		296740000
550	AAANTYCQLLSSQSDNNVR	19	A0A3B6GUZ6	Coatomer subunit beta OS=Triticum aestivum OX=4565 PE=4 SV=1	0W_1	2	1056.49	0.038042	0.0083545	1	34.649	28321000
551	AAANTYCQLLSSQSDNNVR	19	A0A3B6GUZ6	Coatomer subunit beta OS=Triticum aestivum OX=4565 PE=4 SV=1	0W_1	3	704.664	-0.40151	1.2234e-34	1	145.33	42138000
552	AAANTYCQLLSSQSDNNVR	19	A0A3B6GUZ6	Coatomer subunit beta OS=Triticum aestivum OX=4565 PE=4 SV=1	2W_1	2	1056.49	-0.064677	3.7634e-05	1	70.837	46277000
553	AAANTYCQLLSSQSDNNVR	19	A0A3B6GUZ6	Coatomer subunit beta OS=Triticum aestivum OX=4565 PE=4 SV=1	2W_1	3	704.664	-0.82659	1.0908e-56	1	163.41	77229000
554	AAANTYCQLLSSQSDNNVR	19	A0A3B6GUZ6	Coatomer subunit beta OS=Triticum aestivum OX=4565 PE=4 SV=1	0W_2	3	704.664	-0.67996	2.6325e-08	1	78.848	42765000
555	AAANTYCQLLSSQSDNNVR	19	A0A3B6GUZ6	Coatomer subunit beta OS=Triticum aestivum OX=4565 PE=4 SV=1	0W_2	2	1056.49	0.10613	4.0788e-09	1	93.371	35621000
556	AAANTYCQLLSSQSDNNVR	19	A0A3B6GUZ6	Coatomer subunit beta OS=Triticum aestivum OX=4565 PE=4 SV=1	2W_2	2	1056.49	-0.22449	5.1396e-08	1	85.203	56531000
557	AAANTYCQLLSSQSDNNVR	19	A0A3B6GUZ6	Coatomer subunit beta OS=Triticum aestivum OX=4565 PE=4 SV=1	2W_2	3	704.664	-0.51357	4.9865e-26	1	132.25	64386000
558	AAANTYCQLLSSQSDNNVR	19	A0A3B6GUZ6	Coatomer subunit beta OS=Triticum aestivum OX=4565 PE=4 SV=1	0W_3	2	1056.49	0.026333	1.842e-08	1	87.676	35446000
559	AAANTYCQLLSSQSDNNVR	19	A0A3B6GUZ6	Coatomer subunit beta OS=Triticum aestivum OX=4565 PE=4 SV=1	0W_3	3	704.664	-0.37949	4.6743e-67	1	179.74	43018000
560	AAANTYCQLLSSQSDNNVR	19	A0A3B6GUZ6	Coatomer subunit beta OS=Triticum aestivum OX=4565 PE=4 SV=1	2W_3	3	704.664	-0.63087	3.146e-36	1	152.11	67501000
561	AAANTYCQLLSSQSDNNVR	19	A0A3B6GUZ6	Coatomer subunit beta OS=Triticum aestivum OX=4565 PE=4 SV=1	2W_3	2	1056.49	0.14043	1.0607e-18	1	123.63	55585000
562	AAAPAGSGGELLYCGATNFDAINR	24	A0A3B6CGI4	Protein RCC2(predicted) OS=Triticum aestivum OX=4565 PE=4 SV=1	2W_1	3	799.381	-0.017953	0.01162	1	22.569	17128000
563	AAAPAGSGGELLYCGATNFDAINR	24	A0A3B6CGI4	Protein RCC2(predicted) OS=Triticum aestivum OX=4565 PE=4 SV=1	2W_3	3	799.381	-0.75669	0.0016412	1	26.5	13770000
564	AAAPAGSGGELLYCGATNFDAINR	24	A0A3B6CGI4	Protein RCC2(predicted) OS=Triticum aestivum OX=4565 PE=4 SV=1	0W_1	3	799.381	-0.75932	NaN	0		4533000
565	AAAPAGSGGELLYCGATNFDAINR	24	A0A3B6CGI4	Protein RCC2(predicted) OS=Triticum aestivum OX=4565 PE=4 SV=1	0W_2	3	799.381	0.0030753	NaN	0		4594200
566	AAAPAGSGGELLYCGATNFDAINR	24	A0A3B6CGI4	Protein RCC2(predicted) OS=Triticum aestivum OX=4565 PE=4 SV=1	2W_2	3	799.381	-0.19555	NaN	0		12159000
567	AAAPAGSGGELLYCGATNFDAINR	24	A0A3B6CGI4	Protein RCC2(predicted) OS=Triticum aestivum OX=4565 PE=4 SV=1	0W_3	3	799.381	-0.80931	NaN	0		4275600
568	AAAPAPVPR	9	A0A3B6GRX7	Glycos_transf_1 domain-containing protein OS=Triticum aestivum OX=4565 PE=4 SV=1	0W_2	2	425.251	-0.90834	0.022076	1	58.119	787080
569	AAAPAPVPR	9	A0A3B6GRX7	Glycos_transf_1 domain-containing protein OS=Triticum aestivum OX=4565 PE=4 SV=1	0W_1	2	425.251	-1.336	NaN	0		1256300
570	AAAPAPVPR	9	A0A3B6GRX7	Glycos_transf_1 domain-containing protein OS=Triticum aestivum OX=4565 PE=4 SV=1	0W_1	2	425.251	-0.36811	NaN	0		497510
571	AAAPAPVPR	9	A0A3B6GRX7	Glycos_transf_1 domain-containing protein OS=Triticum aestivum OX=4565 PE=4 SV=1	2W_1	2	425.251	-0.65353	NaN	0		850080
572	AAAPAPVPR	9	A0A3B6GRX7	Glycos_transf_1 domain-containing protein OS=Triticum aestivum OX=4565 PE=4 SV=1	2W_2	2	425.251	0.49929	NaN	0		918840
573	AAAPAPVPR	9	A0A3B6GRX7	Glycos_transf_1 domain-containing protein OS=Triticum aestivum OX=4565 PE=4 SV=1	0W_3	2	425.251	-1.0547	NaN	0		512530
574	AAAPAPVPR	9	A0A3B6GRX7	Glycos_transf_1 domain-containing protein OS=Triticum aestivum OX=4565 PE=4 SV=1	0W_3	2	425.251	-0.35824	NaN	0		24337000
575	AAAPAPVPR	9	A0A3B6GRX7	Glycos_transf_1 domain-containing protein OS=Triticum aestivum OX=4565 PE=4 SV=1	2W_3	2	425.251	-0.58723	NaN	0		36550000
576	AAAPGAVPEGAAVR	14	A0A3B6RBU0	Alternative NAD(P)H-ubiquinone oxidoreductase C1, chloroplastic/mitochondrial(predicted) OS=Triticum aestivum OX=4565 PE=4 SV=1	0W_1	2	618.838	-0.9626	0.0053419	1	47.621	12212000
577	AAAPGAVPEGAAVR	14	A0A3B6RBU0	Alternative NAD(P)H-ubiquinone oxidoreductase C1, chloroplastic/mitochondrial(predicted) OS=Triticum aestivum OX=4565 PE=4 SV=1	2W_1	2	618.838	-1.1687	0.00046824	1	66.004	26256000
578	AAAPGAVPEGAAVR	14	A0A3B6RBU0	Alternative NAD(P)H-ubiquinone oxidoreductase C1, chloroplastic/mitochondrial(predicted) OS=Triticum aestivum OX=4565 PE=4 SV=1	0W_2	2	618.838	-0.77412	0.016087	1	41.621	11123000
579	AAAPGAVPEGAAVR	14	A0A3B6RBU0	Alternative NAD(P)H-ubiquinone oxidoreductase C1, chloroplastic/mitochondrial(predicted) OS=Triticum aestivum OX=4565 PE=4 SV=1	0W_3	2	618.838	-0.72722	0.0030565	1	52.891	12018000
580	AAAPGAVPEGAAVR	14	A0A3B6RBU0	Alternative NAD(P)H-ubiquinone oxidoreductase C1, chloroplastic/mitochondrial(predicted) OS=Triticum aestivum OX=4565 PE=4 SV=1	2W_3	2	618.838	-1.6448	0.0020571	1	55.196	26133000
581	AAAPGAVPEGAAVR	14	A0A3B6RBU0	Alternative NAD(P)H-ubiquinone oxidoreductase C1, chloroplastic/mitochondrial(predicted) OS=Triticum aestivum OX=4565 PE=4 SV=1	2W_2	2	618.838	-0.93535	NaN	0		29441000
582	AAAPGGGGVAACK	13	A0A3B6GXX9	Osmotin-like protein(predicted) OS=Triticum aestivum OX=4565 PE=4 SV=1	0W_1	2	543.772	-0.69034	0.00025254	1	74.611	79111000
583	AAAPGGGGVAACK	13	A0A3B6GXX9	Osmotin-like protein(predicted) OS=Triticum aestivum OX=4565 PE=4 SV=1	2W_1	2	543.772	-0.97745	0.00025254	1	74.611	131910000
584	AAAPGGGGVAACK	13	A0A3B6GXX9	Osmotin-like protein(predicted) OS=Triticum aestivum OX=4565 PE=4 SV=1	0W_2	2	543.772	-0.53138	0.00014373	1	83.182	94305000
585	AAAPGGGGVAACK	13	A0A3B6GXX9	Osmotin-like protein(predicted) OS=Triticum aestivum OX=4565 PE=4 SV=1	2W_2	2	543.772	-1.1833	0.0021439	1	57.175	121980000
586	AAAPGGGGVAACK	13	A0A3B6GXX9	Osmotin-like protein(predicted) OS=Triticum aestivum OX=4565 PE=4 SV=1	0W_3	2	543.772	-1.3501	0.00025254	1	74.611	99699000
587	AAAPGGGGVAACK	13	A0A3B6GXX9	Osmotin-like protein(predicted) OS=Triticum aestivum OX=4565 PE=4 SV=1	2W_3	2	543.772	-1.0065	0.00028107	1	73.435	167890000
588	AAAPGGGGVAACK	13	A0A3B6GXX9	Osmotin-like protein(predicted) OS=Triticum aestivum OX=4565 PE=4 SV=1	2W_3	2	543.772	0.084709	NaN	0		2143200
589	AAAPPAFK	8	A0A3B6PR23	AAA domain-containing protein OS=Triticum aestivum OX=4565 PE=4 SV=1	2W_2	2	386.721	0.15419	0.054626	1	55.676	4613600
590	AAAPPAFK	8	A0A3B6PR23	AAA domain-containing protein OS=Triticum aestivum OX=4565 PE=4 SV=1	0W_1	2	386.721	0.096628	NaN	0		3712200
591	AAAPPAFK	8	A0A3B6PR23	AAA domain-containing protein OS=Triticum aestivum OX=4565 PE=4 SV=1	2W_1	2	386.721	0.0027759	NaN	0		4668400
592	AAAPPAFK	8	A0A3B6PR23	AAA domain-containing protein OS=Triticum aestivum OX=4565 PE=4 SV=1	0W_2	2	386.721	-0.1698	NaN	0		4340500
593	AAAPPAFK	8	A0A3B6PR23	AAA domain-containing protein OS=Triticum aestivum OX=4565 PE=4 SV=1	0W_3	2	386.721	-0.053678	NaN	0		4705800
594	AAAPPAFK	8	A0A3B6PR23	AAA domain-containing protein OS=Triticum aestivum OX=4565 PE=4 SV=1	2W_3	2	386.721	-0.021107	NaN	0		6423500
595	AAAPPEVELLR	11	A0A3B5XT84	E3 ubiquitin-protein ligase UHRF2(predicted) OS=Triticum aestivum OX=4565 PE=4 SV=1	0W_2	2	583.332	0.98399	0.037204	1	44.543	17467000
596	AAAPPEVELLR	11	A0A3B5XT84	E3 ubiquitin-protein ligase UHRF2(predicted) OS=Triticum aestivum OX=4565 PE=4 SV=1	2W_2	2	583.332	0.62762	0.037204	1	44.543	20186000
597	AAAPPEVELLR	11	A0A3B5XT84	E3 ubiquitin-protein ligase UHRF2(predicted) OS=Triticum aestivum OX=4565 PE=4 SV=1	0W_1	2	583.332	1.2251	NaN	0		13615000
598	AAAPPEVELLR	11	A0A3B5XT84	E3 ubiquitin-protein ligase UHRF2(predicted) OS=Triticum aestivum OX=4565 PE=4 SV=1	2W_1	2	583.332	0.98109	NaN	0		16185000
599	AAAPPEVELLR	11	A0A3B5XT84	E3 ubiquitin-protein ligase UHRF2(predicted) OS=Triticum aestivum OX=4565 PE=4 SV=1	0W_3	2	583.332	-0.17371	NaN	0		17085000
600	AAAPPEVELLR	11	A0A3B5XT84	E3 ubiquitin-protein ligase UHRF2(predicted) OS=Triticum aestivum OX=4565 PE=4 SV=1	2W_3	2	583.332	0.85768	NaN	0		19971000
601	AAAPSVSDDLVLR	13	A0A3B6EDF7	Protein ABCI7, chloroplastic(predicted) OS=Triticum aestivum OX=4565 PE=4 SV=1	0W_1	2	657.357		0.0065952	1	59.227	0
602	AAAPSVSDDLVLR	13	A0A3B6EDF7	Protein ABCI7, chloroplastic(predicted) OS=Triticum aestivum OX=4565 PE=4 SV=1	0W_2	2	657.357		0.011319	1	43.761	0
603	AAAPSVSDDLVLR	13	A0A3B6EDF7	Protein ABCI7, chloroplastic(predicted) OS=Triticum aestivum OX=4565 PE=4 SV=1	0W_3	2	657.357	0.23307	0.0055951	1	51.726	6256500
604	AAAPSVSDDLVLR	13	A0A3B6EDF7	Protein ABCI7, chloroplastic(predicted) OS=Triticum aestivum OX=4565 PE=4 SV=1	2W_3	2	657.357	-0.48499	0.00041302	1	67.997	8835400
605	AAAPSVSDDLVLR	13	A0A3B6EDF7	Protein ABCI7, chloroplastic(predicted) OS=Triticum aestivum OX=4565 PE=4 SV=1	2W_1	2	657.357	-0.18199	NaN	0		10836000
606	AAAPSVSDDLVLR	13	A0A3B6EDF7	Protein ABCI7, chloroplastic(predicted) OS=Triticum aestivum OX=4565 PE=4 SV=1	2W_2	2	657.357	-0.16619	NaN	0		9778700
607	AAAPVASQAQAVLR	14	A0A3B6GXZ5	Origin of replication complex subunit 4 OS=Triticum aestivum OX=4565 PE=3 SV=1	0W_1	2	697.891	-0.34443	7.6835e-05	1	73.927	10755000
608	AAAPVASQAQAVLR	14	A0A3B6GXZ5	Origin of replication complex subunit 4 OS=Triticum aestivum OX=4565 PE=3 SV=1	2W_1	2	697.891	0.017239	0.0001849	1	66.004	9855800
609	AAAPVASQAQAVLR	14	A0A3B6GXZ5	Origin of replication complex subunit 4 OS=Triticum aestivum OX=4565 PE=3 SV=1	2W_2	2	697.891	0.59443	0.00030031	1	63.181	10557000
610	AAAPVASQAQAVLR	14	A0A3B6GXZ5	Origin of replication complex subunit 4 OS=Triticum aestivum OX=4565 PE=3 SV=1	2W_3	2	697.891	1.1398	0.00010671	1	70.438	9948300
611	AAAPVASQAQAVLR	14	A0A3B6GXZ5	Origin of replication complex subunit 4 OS=Triticum aestivum OX=4565 PE=3 SV=1	0W_2	2	697.891	0.075609	NaN	0		11825000
612	AAAPVASQAQAVLR	14	A0A3B6GXZ5	Origin of replication complex subunit 4 OS=Triticum aestivum OX=4565 PE=3 SV=1	0W_3	2	697.891	0.55148	NaN	0		8229500
613	AAAPYLPATLAPLLASSAAR	20	A0A3B6E8M7	BnaA06g13030D protein(predicted) OS=Triticum aestivum OX=4565 PE=4 SV=1	0W_2	3	642.367	2.3974	0.012186	1	23.658	118860000
614	AAAPYLPATLAPLLASSAAR	20	A0A3B6E8M7	BnaA06g13030D protein(predicted) OS=Triticum aestivum OX=4565 PE=4 SV=1	2W_2	3	642.367	1.7635	0.0016275	1	33.918	397670000
615	AAAPYLPATLAPLLASSAAR	20	A0A3B6E8M7	BnaA06g13030D protein(predicted) OS=Triticum aestivum OX=4565 PE=4 SV=1	0W_3	3	642.367	2.1641	0.020845	1	21.938	102720000
616	AAAQCAGQEVMIR	13	A0A3B6PGU1	ATP-dependent helicase BRM(predicted) OS=Triticum aestivum OX=4565 PE=4 SV=1	2W_1	2	710.837	-1.9792	0.004519	1	45.28	4839500
617	AAAQCAGQEVMIR	13	A0A3B6PGU1	ATP-dependent helicase BRM(predicted) OS=Triticum aestivum OX=4565 PE=4 SV=1	2W_2	2	710.837	-1.3506	0.003583	1	46.069	3522600
618	AAAQCAGQEVMIR	13	A0A3B6PGU1	ATP-dependent helicase BRM(predicted) OS=Triticum aestivum OX=4565 PE=4 SV=1	0W_1	2	710.837	-1.0522	NaN	0		1611300
619	AAAQCAGQEVMIR	13	A0A3B6PGU1	ATP-dependent helicase BRM(predicted) OS=Triticum aestivum OX=4565 PE=4 SV=1	0W_2	2	710.837	-1.8257	NaN	0		1887600
620	AAAQCAGQEVMIR	13	A0A3B6PGU1	ATP-dependent helicase BRM(predicted) OS=Triticum aestivum OX=4565 PE=4 SV=1	2W_3	2	710.837	-1.4778	NaN	0		4138000
621	AAAQCAGQEVMIR	13	A0A3B6PGU1	ATP-dependent helicase BRM(predicted) OS=Triticum aestivum OX=4565 PE=4 SV=1	2W_1	2	702.84	0.67313	0.00015971	1	80.312	12568000
622	AAAQCAGQEVMIR	13	A0A3B6PGU1	ATP-dependent helicase BRM(predicted) OS=Triticum aestivum OX=4565 PE=4 SV=1	2W_2	2	702.84	1.2723	0.00014362	1	83.204	13215000
623	AAAQCAGQEVMIR	13	A0A3B6PGU1	ATP-dependent helicase BRM(predicted) OS=Triticum aestivum OX=4565 PE=4 SV=1	2W_3	2	702.84	1.2104	7.0343e-06	1	104.24	11423000
624	AAAQCAGQEVMIR	13	A0A3B6PGU1	ATP-dependent helicase BRM(predicted) OS=Triticum aestivum OX=4565 PE=4 SV=1	0W_2	2	702.84	-0.44753	NaN	0		21985000
625	AAAQCAGQEVMIR	13	A0A3B6PGU1	ATP-dependent helicase BRM(predicted) OS=Triticum aestivum OX=4565 PE=4 SV=1	0W_3	2	702.84	1.2952	NaN	0		17409000
626	AAASASLPGFAHNAR	15	A0A3B6MKC1	No exine formation 1(predicted) OS=Triticum aestivum OX=4565 PE=4 SV=1	2W_1	2	720.871	-0.15523	0.0027567	1	49.298	5429700
627	AAASASLPGFAHNAR	15	A0A3B6MKC1	No exine formation 1(predicted) OS=Triticum aestivum OX=4565 PE=4 SV=1	2W_1	3	480.916	-0.51225	0.00013186	1	58.32	20758000
628	AAASASLPGFAHNAR	15	A0A3B6MKC1	No exine formation 1(predicted) OS=Triticum aestivum OX=4565 PE=4 SV=1	2W_2	2	720.871	0.26155	0.0083702	1	43.03	5749100
629	AAASASLPGFAHNAR	15	A0A3B6MKC1	No exine formation 1(predicted) OS=Triticum aestivum OX=4565 PE=4 SV=1	2W_2	3	480.916	-0.52479	0.0047029	1	35.037	22362000
630	AAASASLPGFAHNAR	15	A0A3B6MKC1	No exine formation 1(predicted) OS=Triticum aestivum OX=4565 PE=4 SV=1	2W_3	2	720.871	-0.61961	0.00022522	1	66.989	7746000
631	AAASASLPGFAHNAR	15	A0A3B6MKC1	No exine formation 1(predicted) OS=Triticum aestivum OX=4565 PE=4 SV=1	2W_3	3	480.916	-0.67816	0.0020528	1	41.621	24594000
632	AAASASLPGFAHNAR	15	A0A3B6MKC1	No exine formation 1(predicted) OS=Triticum aestivum OX=4565 PE=4 SV=1	0W_1	2	720.871	-0.54843	NaN	0		4651900
633	AAASASLPGFAHNAR	15	A0A3B6MKC1	No exine formation 1(predicted) OS=Triticum aestivum OX=4565 PE=4 SV=1	0W_1	3	480.916	-0.49487	NaN	0		11719000
634	AAASASLPGFAHNAR	15	A0A3B6MKC1	No exine formation 1(predicted) OS=Triticum aestivum OX=4565 PE=4 SV=1	0W_2	2	720.871	-0.16733	NaN	0		4089300
635	AAASASLPGFAHNAR	15	A0A3B6MKC1	No exine formation 1(predicted) OS=Triticum aestivum OX=4565 PE=4 SV=1	0W_2	3	480.916	-0.43708	NaN	0		10501000
636	AAASASLPGFAHNAR	15	A0A3B6MKC1	No exine formation 1(predicted) OS=Triticum aestivum OX=4565 PE=4 SV=1	0W_3	2	720.871	-1.2826	NaN	0		2279800
637	AAASASLPGFAHNAR	15	A0A3B6MKC1	No exine formation 1(predicted) OS=Triticum aestivum OX=4565 PE=4 SV=1	0W_3	3	480.916	-1.079	NaN	0		11209000
638	AAASAVGCHALIHDEGDPILVVSSAK	26	A0A1D6SDJ6	Expressed protein(predicted) OS=Triticum aestivum OX=4565 PE=4 SV=1	0W_1	4	647.834	1.2439	0.0043712	1	23.62	16491000
639	AAASAVGCHALIHDEGDPILVVSSAK	26	A0A1D6SDJ6	Expressed protein(predicted) OS=Triticum aestivum OX=4565 PE=4 SV=1	0W_2	4	647.834	1.7436	0.024914	1	17.369	14954000
640	AAASAVGCHALIHDEGDPILVVSSAK	26	A0A1D6SDJ6	Expressed protein(predicted) OS=Triticum aestivum OX=4565 PE=4 SV=1	0W_3	4	647.834	1.5239	0.050871	1	10.951	14122000
641	AAASAVGCHALIHDEGDPILVVSSAK	26	A0A1D6SDJ6	Expressed protein(predicted) OS=Triticum aestivum OX=4565 PE=4 SV=1	2W_1	4	647.834	-1.1757	NaN	0		10955000
642	AAASLYVK	8	W5BXY6	Gamma-soluble NSF attachment protein(predicted) OS=Triticum aestivum OX=4565 GN=CAMPLR22A2D_LOCUS4603 PE=4 SV=1	0W_2	2	411.74	0.35045	0.042709	1	60.436	6525900
643	AAASLYVK	8	W5BXY6	Gamma-soluble NSF attachment protein(predicted) OS=Triticum aestivum OX=4565 GN=CAMPLR22A2D_LOCUS4603 PE=4 SV=1	0W_1	2	411.74	-0.47454	NaN	0		7577400
644	AAASLYVK	8	W5BXY6	Gamma-soluble NSF attachment protein(predicted) OS=Triticum aestivum OX=4565 GN=CAMPLR22A2D_LOCUS4603 PE=4 SV=1	2W_1	2	411.74	1.1127	NaN	0		3910100
645	AAASLYVK	8	W5BXY6	Gamma-soluble NSF attachment protein(predicted) OS=Triticum aestivum OX=4565 GN=CAMPLR22A2D_LOCUS4603 PE=4 SV=1	2W_2	2	411.74	-0.096463	NaN	0		3607100
646	AAASLYVK	8	W5BXY6	Gamma-soluble NSF attachment protein(predicted) OS=Triticum aestivum OX=4565 GN=CAMPLR22A2D_LOCUS4603 PE=4 SV=1	0W_3	2	411.74	-0.54558	NaN	0		7597900
647	AAASLYVK	8	W5BXY6	Gamma-soluble NSF attachment protein(predicted) OS=Triticum aestivum OX=4565 GN=CAMPLR22A2D_LOCUS4603 PE=4 SV=1	2W_3	2	411.74	0.18947	NaN	0		4903900
648	AAASNSPWYGPDR	13	A0A3B6RIZ5	Chlorophyll a-b binding protein, chloroplastic OS=Triticum aestivum OX=4565 PE=3 SV=1	0W_1	2	696.321	-0.10478	0.00015971	1	80.312	38242000
649	AAASNSPWYGPDR	13	A0A3B6RIZ5	Chlorophyll a-b binding protein, chloroplastic OS=Triticum aestivum OX=4565 PE=3 SV=1	2W_1	2	696.321	0.34376	0.0020998	1	57.434	52624000
650	AAASNSPWYGPDR	13	A0A3B6RIZ5	Chlorophyll a-b binding protein, chloroplastic OS=Triticum aestivum OX=4565 PE=3 SV=1	0W_2	2	696.321	0.63045	6.4198e-20	1	143.42	39086000
651	AAASNSPWYGPDR	13	A0A3B6RIZ5	Chlorophyll a-b binding protein, chloroplastic OS=Triticum aestivum OX=4565 PE=3 SV=1	2W_2	2	696.321	0.50257	3.3304e-06	1	107.17	57438000
652	AAASNSPWYGPDR	13	A0A3B6RIZ5	Chlorophyll a-b binding protein, chloroplastic OS=Triticum aestivum OX=4565 PE=3 SV=1	0W_3	2	696.321	0.56289	0.00093037	1	64.313	29453000
653	AAASNSPWYGPDR	13	A0A3B6RIZ5	Chlorophyll a-b binding protein, chloroplastic OS=Triticum aestivum OX=4565 PE=3 SV=1	2W_3	2	696.321	0.26396	0.00010509	1	89.46	65000000
654	AAASNSPWYGPDR	13	A0A3B6RIZ5	Chlorophyll a-b binding protein, chloroplastic OS=Triticum aestivum OX=4565 PE=3 SV=1	2W_3	2	696.321	1.7324	NaN	0		9428400
655	AAASQGYGATIR	12	A0A3B6GZ80	PNPLA domain-containing protein OS=Triticum aestivum OX=4565 PE=4 SV=1	0W_1	2	583.302	0.36071	0.00061195	1	77.597	4785100
656	AAASQGYGATIR	12	A0A3B6GZ80	PNPLA domain-containing protein OS=Triticum aestivum OX=4565 PE=4 SV=1	2W_1	2	583.302	-0.27518	0.00054063	1	79.492	7465800
657	AAASQGYGATIR	12	A0A3B6GZ80	PNPLA domain-containing protein OS=Triticum aestivum OX=4565 PE=4 SV=1	0W_2	2	583.302		1.9423e-06	1	78.903	0
658	AAASQGYGATIR	12	A0A3B6GZ80	PNPLA domain-containing protein OS=Triticum aestivum OX=4565 PE=4 SV=1	2W_2	2	583.302	0.63704	0.00010451	1	93.623	6144700
659	AAASQGYGATIR	12	A0A3B6GZ80	PNPLA domain-containing protein OS=Triticum aestivum OX=4565 PE=4 SV=1	0W_3	2	583.302	0.74503	0.00054063	1	79.492	5112400
660	AAASQGYGATIR	12	A0A3B6GZ80	PNPLA domain-containing protein OS=Triticum aestivum OX=4565 PE=4 SV=1	2W_3	2	583.302	-0.052328	0.00089781	1	69.03	6684000
661	AAASSALGLLIK	12	A0A3B6JME9	Protein SHOOT GRAVITROPISM 6(predicted) OS=Triticum aestivum OX=4565 PE=4 SV=1	2W_2	2	557.845	-0.53515	0.011576	1	49.448	6421600
662	AAASSALGLLIK	12	A0A3B6JME9	Protein SHOOT GRAVITROPISM 6(predicted) OS=Triticum aestivum OX=4565 PE=4 SV=1	0W_3	2	557.845	-1.2229	0.0032028	1	58.172	2833300
663	AAASSALGLLIK	12	A0A3B6JME9	Protein SHOOT GRAVITROPISM 6(predicted) OS=Triticum aestivum OX=4565 PE=4 SV=1	2W_3	2	557.845	-0.35576	0.0040492	1	56.205	8667300
664	AAASSALGLLIK	12	A0A3B6JME9	Protein SHOOT GRAVITROPISM 6(predicted) OS=Triticum aestivum OX=4565 PE=4 SV=1	2W_1	2	557.845	-0.30652	NaN	0		5830600
665	AAASSATSVHDFTVK	15	A0A3B6CB61	Glutathione peroxidase OS=Triticum aestivum OX=4565 PE=3 SV=1	0W_1	2	767.381	0.86011	7.5318e-15	1	130.66	169800000
666	AAASSATSVHDFTVK	15	A0A3B6CB61	Glutathione peroxidase OS=Triticum aestivum OX=4565 PE=3 SV=1	2W_1	2	767.381	0.16412	1.4886e-05	1	97.45	191230000
667	AAASSATSVHDFTVK	15	A0A3B6CB61	Glutathione peroxidase OS=Triticum aestivum OX=4565 PE=3 SV=1	0W_2	2	767.381	0.77151	6.0674e-20	1	135.14	140540000
668	AAASSATSVHDFTVK	15	A0A3B6CB61	Glutathione peroxidase OS=Triticum aestivum OX=4565 PE=3 SV=1	2W_2	2	767.381	0.62145	6.4684e-05	1	88.561	198250000
669	AAASSATSVHDFTVK	15	A0A3B6CB61	Glutathione peroxidase OS=Triticum aestivum OX=4565 PE=3 SV=1	0W_3	2	767.381	0.72998	5.1176e-09	1	113.4	128730000
670	AAASSATSVHDFTVK	15	A0A3B6CB61	Glutathione peroxidase OS=Triticum aestivum OX=4565 PE=3 SV=1	2W_3	2	767.381	0.54743	5.1176e-09	1	113.4	230140000
671	AAATAAAPVASQAQAVLR	18	A0A3B6FPS3	Origin of replication complex subunit 4 OS=Triticum aestivum OX=4565 PE=3 SV=1	0W_1	2	854.971	0.65912	1.1152e-05	1	67.646	3523500
672	AAATAAAPVASQAQAVLR	18	A0A3B6FPS3	Origin of replication complex subunit 4 OS=Triticum aestivum OX=4565 PE=3 SV=1	2W_1	2	854.971	0.1987	0.00020929	1	52.172	6811800
673	AAATAAAPVASQAQAVLR	18	A0A3B6FPS3	Origin of replication complex subunit 4 OS=Triticum aestivum OX=4565 PE=3 SV=1	0W_2	2	854.971	-0.15012	0.0016333	1	40.493	3267500
674	AAATAAAPVASQAQAVLR	18	A0A3B6FPS3	Origin of replication complex subunit 4 OS=Triticum aestivum OX=4565 PE=3 SV=1	2W_2	2	854.971	0.89456	0.00020929	1	52.172	4856100
675	AAATAAAPVASQAQAVLR	18	A0A3B6FPS3	Origin of replication complex subunit 4 OS=Triticum aestivum OX=4565 PE=3 SV=1	0W_3	2	854.971	-0.20563	0.000147	1	55.011	3037200
676	AAATAAAPVASQAQAVLR	18	A0A3B6FPS3	Origin of replication complex subunit 4 OS=Triticum aestivum OX=4565 PE=3 SV=1	2W_3	2	854.971	0.55891	1.0746e-07	1	64.454	7357700
677	AAATATVQAQPGLDAR	16	A0A3B6MQZ2	WD_REPEATS_REGION domain-containing protein OS=Triticum aestivum OX=4565 PE=4 SV=1	0W_1	2	791.913	-0.21382	0.00036604	1	52.862	2950500
678	AAATATVQAQPGLDAR	16	A0A3B6MQZ2	WD_REPEATS_REGION domain-containing protein OS=Triticum aestivum OX=4565 PE=4 SV=1	2W_1	2	791.913	0.26374	1.1205e-09	1	113.47	10863000
679	AAATATVQAQPGLDAR	16	A0A3B6MQZ2	WD_REPEATS_REGION domain-containing protein OS=Triticum aestivum OX=4565 PE=4 SV=1	0W_2	2	791.913	0.074884	5.2533e-05	1	62.055	3661500
680	AAATATVQAQPGLDAR	16	A0A3B6MQZ2	WD_REPEATS_REGION domain-containing protein OS=Triticum aestivum OX=4565 PE=4 SV=1	2W_2	2	791.913	0.35487	3.5089e-14	1	123.02	10931000
681	AAATATVQAQPGLDAR	16	A0A3B6MQZ2	WD_REPEATS_REGION domain-containing protein OS=Triticum aestivum OX=4565 PE=4 SV=1	0W_3	2	791.913	0.44861	1.0415e-05	1	82.59	3733000
682	AAATATVQAQPGLDAR	16	A0A3B6MQZ2	WD_REPEATS_REGION domain-containing protein OS=Triticum aestivum OX=4565 PE=4 SV=1	2W_3	2	791.913	0.0602	1.9539e-07	1	108.14	14170000
683	AAATLCR	7	A0A3B5Z565	Calcium-dependent protein kinase 3(predicted) OS=Triticum aestivum OX=4565 PE=3 SV=1	0W_1	2	381.7		0.034631	1	73.039	0
684	AAATLCR	7	A0A3B5Z565	Calcium-dependent protein kinase 3(predicted) OS=Triticum aestivum OX=4565 PE=3 SV=1	2W_3	2	381.7	0.62096	0.040643	1	92.467	4382700
685	AAATLCR	7	A0A3B5Z565	Calcium-dependent protein kinase 3(predicted) OS=Triticum aestivum OX=4565 PE=3 SV=1	0W_1	2	381.7	0.0066611	NaN	0		995160
686	AAATLCR	7	A0A3B5Z565	Calcium-dependent protein kinase 3(predicted) OS=Triticum aestivum OX=4565 PE=3 SV=1	2W_1	2	381.7	0.45324	NaN	0		4024200
687	AAATLCR	7	A0A3B5Z565	Calcium-dependent protein kinase 3(predicted) OS=Triticum aestivum OX=4565 PE=3 SV=1	0W_2	2	381.7	0.62464	NaN	0		3329200
688	AAATLCR	7	A0A3B5Z565	Calcium-dependent protein kinase 3(predicted) OS=Triticum aestivum OX=4565 PE=3 SV=1	2W_2	2	381.7	0.50753	NaN	0		4535000
689	AAATQAIGFFALHTK	15	A0A3B6JK24	Importin N-terminal domain-containing protein OS=Triticum aestivum OX=4565 PE=4 SV=1	2W_1	3	516.284	0.63707	0.0001354	1	57.973	13310000
690	AAATQAIGFFALHTK	15	A0A3B6JK24	Importin N-terminal domain-containing protein OS=Triticum aestivum OX=4565 PE=4 SV=1	2W_2	3	516.284	-0.43126	0.00022903	1	55.097	19150000
691	AAATQAIGFFALHTK	15	A0A3B6JK24	Importin N-terminal domain-containing protein OS=Triticum aestivum OX=4565 PE=4 SV=1	2W_3	3	516.284	-0.6566	0.00019454	1	55.755	11578000
692	AAAVAAAGGEAAAAALAAAK	20	A0A3B6KLQ7	Magnesium transporter OS=Triticum aestivum OX=4565 PE=3 SV=1	2W_1	2	819.944	0.30429	0.00054498	1	52.52	3257300
693	AAAVAAAGGEAAAAALAAAK	20	A0A3B6KLQ7	Magnesium transporter OS=Triticum aestivum OX=4565 PE=3 SV=1	2W_3	2	819.944	1.0914	0.00044431	1	57.525	2744900
694	AAAVADAAVPAVAK	14	A0A3B6EN11	Selenium-binding protein 1(predicted) OS=Triticum aestivum OX=4565 PE=4 SV=1	2W_1	2	633.856	0.49142	6.6776e-05	1	75.102	18572000
695	AAAVADAAVPAVAK	14	A0A3B6EN11	Selenium-binding protein 1(predicted) OS=Triticum aestivum OX=4565 PE=4 SV=1	0W_3	2	633.856	0.27024	7.0751e-05	1	86.803	7372700
696	AAAVADAAVPAVAK	14	A0A3B6EN11	Selenium-binding protein 1(predicted) OS=Triticum aestivum OX=4565 PE=4 SV=1	0W_1	2	633.856	0.47306	NaN	0		7344700
697	AAAVADAAVPAVAK	14	A0A3B6EN11	Selenium-binding protein 1(predicted) OS=Triticum aestivum OX=4565 PE=4 SV=1	0W_2	2	633.856	0.30473	NaN	0		10719000
698	AAAVADAAVPAVAK	14	A0A3B6EN11	Selenium-binding protein 1(predicted) OS=Triticum aestivum OX=4565 PE=4 SV=1	2W_2	2	633.856	0.59481	NaN	0		20570000
699	AAAVADAAVPAVAK	14	A0A3B6EN11	Selenium-binding protein 1(predicted) OS=Triticum aestivum OX=4565 PE=4 SV=1	2W_3	2	633.856	0.30672	NaN	0		16475000
700	AAAVESLSLPDSSSLEQR	18	A0A3B5YWZ2	BRO1 domain-containing protein OS=Triticum aestivum OX=4565 PE=4 SV=1	2W_1	2	930.471	0.91128	0.0068789	1	35.872	6543200
701	AAAVESLSLPDSSSLEQR	18	A0A3B5YWZ2	BRO1 domain-containing protein OS=Triticum aestivum OX=4565 PE=4 SV=1	2W_2	2	930.471	0.4212	0.0025249	1	43.208	8365600
702	AAAVESLSLPDSSSLEQR	18	A0A3B5YWZ2	BRO1 domain-containing protein OS=Triticum aestivum OX=4565 PE=4 SV=1	2W_3	2	930.471	0.27376	0.0058016	1	37.687	7975400
703	AAAVGANSQAAQSMLK	16	A0A3B6SDN7	Proteasome subunit alpha type OS=Triticum aestivum OX=4565 PE=3 SV=1	0W_1	2	759.391	-0.21502	4.0961e-05	1	70.197	29388000
704	AAAVGANSQAAQSMLK	16	A0A3B6SDN7	Proteasome subunit alpha type OS=Triticum aestivum OX=4565 PE=3 SV=1	2W_1	2	759.391	-0.4222	4.0396e-05	1	88.768	25271000
705	AAAVGANSQAAQSMLK	16	A0A3B6SDN7	Proteasome subunit alpha type OS=Triticum aestivum OX=4565 PE=3 SV=1	0W_2	2	759.391	-0.0041736	1.0473e-06	1	106.3	25891000
706	AAAVGANSQAAQSMLK	16	A0A3B6SDN7	Proteasome subunit alpha type OS=Triticum aestivum OX=4565 PE=3 SV=1	2W_2	2	759.391	-0.51335	3.3657e-05	1	72.315	18136000
707	AAAVGANSQAAQSMLK	16	A0A3B6SDN7	Proteasome subunit alpha type OS=Triticum aestivum OX=4565 PE=3 SV=1	0W_3	2	759.391	-0.46698	0.00014707	1	61.165	18453000
708	AAAVGANSQAAQSMLK	16	A0A3B6SDN7	Proteasome subunit alpha type OS=Triticum aestivum OX=4565 PE=3 SV=1	2W_3	2	759.391	-0.43193	3.6246e-05	1	86.497	18930000
709	AAAVLTDPAAR	11	A0A3B6IUV4	USP domain-containing protein OS=Triticum aestivum OX=4565 PE=4 SV=1	0W_1	2	528.296	0.33517	0.0020965	1	72.2	11697000
710	AAAVLTDPAAR	11	A0A3B6IUV4	USP domain-containing protein OS=Triticum aestivum OX=4565 PE=4 SV=1	2W_1	2	528.296	1.5548	0.0022209	1	70.942	14903000
711	AAAVLTDPAAR	11	A0A3B6IUV4	USP domain-containing protein OS=Triticum aestivum OX=4565 PE=4 SV=1	0W_2	2	528.296	0.40073	0.0036785	1	64.82	14508000
712	AAAVLTDPAAR	11	A0A3B6IUV4	USP domain-containing protein OS=Triticum aestivum OX=4565 PE=4 SV=1	2W_2	2	528.296	1.6568	0.0022209	1	70.942	16173000
713	AAAVLTDPAAR	11	A0A3B6IUV4	USP domain-containing protein OS=Triticum aestivum OX=4565 PE=4 SV=1	0W_3	2	528.296	1.1508	0.0047373	1	62.466	11871000
714	AAAVLTDPAAR	11	A0A3B6IUV4	USP domain-containing protein OS=Triticum aestivum OX=4565 PE=4 SV=1	2W_3	2	528.296	1.5409	0.0020965	1	72.2	10465000
715	AAAVSGALTR	10	A0A3B5Y154	NAD(P)-bd_dom domain-containing protein OS=Triticum aestivum OX=4565 PE=4 SV=1	2W_2	2	458.764	0.95098	0.038061	1	47.302	4793300
716	AAAVSGALTR	10	A0A3B5Y154	NAD(P)-bd_dom domain-containing protein OS=Triticum aestivum OX=4565 PE=4 SV=1	0W_1	2	458.764	2.0317	NaN	0		2094300
717	AAAVSGALTR	10	A0A3B5Y154	NAD(P)-bd_dom domain-containing protein OS=Triticum aestivum OX=4565 PE=4 SV=1	2W_1	2	458.764	1.5417	NaN	0		5048700
718	AAAVSGALTR	10	A0A3B5Y154	NAD(P)-bd_dom domain-containing protein OS=Triticum aestivum OX=4565 PE=4 SV=1	0W_2	2	458.764	1.0744	NaN	0		4181400
719	AAAVSGALTR	10	A0A3B5Y154	NAD(P)-bd_dom domain-containing protein OS=Triticum aestivum OX=4565 PE=4 SV=1	0W_3	2	458.764	0.18203	NaN	0		5732700
720	AAAVSGALTR	10	A0A3B5Y154	NAD(P)-bd_dom domain-containing protein OS=Triticum aestivum OX=4565 PE=4 SV=1	2W_3	2	458.764	0.88686	NaN	0		4751900
721	AAAVVDAAVPVAAK	14	W5D4W6	Selenium-binding protein 1(predicted) OS=Triticum aestivum OX=4565 GN=TRAES_3BF153000010CFD_c1 PE=4 SV=1	0W_1	2	647.872	0.48997	0.00014467	1	66.989	26854000
722	AAAVVDAAVPVAAK	14	W5D4W6	Selenium-binding protein 1(predicted) OS=Triticum aestivum OX=4565 GN=TRAES_3BF153000010CFD_c1 PE=4 SV=1	0W_2	2	647.872	0.14703	5.8464e-05	1	76.073	20457000
723	AAAVVDAAVPVAAK	14	W5D4W6	Selenium-binding protein 1(predicted) OS=Triticum aestivum OX=4565 GN=TRAES_3BF153000010CFD_c1 PE=4 SV=1	2W_2	2	647.872	0.71353	6.6776e-05	1	75.102	40074000
724	AAAVVDAAVPVAAK	14	W5D4W6	Selenium-binding protein 1(predicted) OS=Triticum aestivum OX=4565 GN=TRAES_3BF153000010CFD_c1 PE=4 SV=1	0W_3	2	647.872	0.46429	5.8464e-05	1	76.073	24163000
725	AAAVVDAAVPVAAK	14	W5D4W6	Selenium-binding protein 1(predicted) OS=Triticum aestivum OX=4565 GN=TRAES_3BF153000010CFD_c1 PE=4 SV=1	2W_3	2	647.872	0.7826	0.0019544	1	48.527	41431000
726	AACAALGAGRPDAAVR	16	A0A3B6QLC3	Intraflagellar transport protein(predicted) OS=Triticum aestivum OX=4565 PE=4 SV=1	0W_1	3	509.6	0.68765	0.0075838	1	35.118	5009100
727	AACAALGAGRPDAAVR	16	A0A3B6QLC3	Intraflagellar transport protein(predicted) OS=Triticum aestivum OX=4565 PE=4 SV=1	0W_3	3	509.6	-0.3431	0.01044	1	34.432	3620500
728	AACAALGAGRPDAAVR	16	A0A3B6QLC3	Intraflagellar transport protein(predicted) OS=Triticum aestivum OX=4565 PE=4 SV=1	2W_1	3	509.6	-2.3057	NaN	0		4005200
729	AACAALGAGRPDAAVR	16	A0A3B6QLC3	Intraflagellar transport protein(predicted) OS=Triticum aestivum OX=4565 PE=4 SV=1	0W_2	3	509.6	0.28077	NaN	0		4492800
730	AACAALGAGRPDAAVR	16	A0A3B6QLC3	Intraflagellar transport protein(predicted) OS=Triticum aestivum OX=4565 PE=4 SV=1	2W_2	3	509.6	-1.8065	NaN	0		2894200
731	AACAALGAGRPDAAVR	16	A0A3B6QLC3	Intraflagellar transport protein(predicted) OS=Triticum aestivum OX=4565 PE=4 SV=1	2W_3	3	509.6	-1.1407	NaN	0		2809300
732	AADALAELIFGCVGR	15	A0A3B5Y7K9	Mot1(predicted) OS=Triticum aestivum OX=4565 PE=4 SV=1	2W_2	2	781.903	-0.73659	0.0014574	1	54.09	3587200
733	AADALAELIFGCVGR	15	A0A3B5Y7K9	Mot1(predicted) OS=Triticum aestivum OX=4565 PE=4 SV=1	0W_1	2	781.903	1.0001	NaN	0		1186200
734	AADALAELIFGCVGR	15	A0A3B5Y7K9	Mot1(predicted) OS=Triticum aestivum OX=4565 PE=4 SV=1	2W_1	2	781.903	-0.58926	NaN	0		3950600
735	AADALAELIFGCVGR	15	A0A3B5Y7K9	Mot1(predicted) OS=Triticum aestivum OX=4565 PE=4 SV=1	0W_2	2	781.903	0.53481	NaN	0		1467100
736	AADALAELIFGCVGR	15	A0A3B5Y7K9	Mot1(predicted) OS=Triticum aestivum OX=4565 PE=4 SV=1	0W_3	2	781.903	-0.32298	NaN	0		1234400
737	AADALAELIFGCVGR	15	A0A3B5Y7K9	Mot1(predicted) OS=Triticum aestivum OX=4565 PE=4 SV=1	2W_3	2	781.903	-0.4224	NaN	0		3196400
738	AADALSIIPGAVLR	14	A0A3B6JN62	Protein VAC14-like protein(predicted) OS=Triticum aestivum OX=4565 PE=4 SV=1	2W_1	2	704.912	0.1143	6.3667e-05	1	90.412	21117000
739	AADALSIIPGAVLR	14	A0A3B6JN62	Protein VAC14-like protein(predicted) OS=Triticum aestivum OX=4565 PE=4 SV=1	0W_2	2	704.912	-0.040064	0.0052968	1	42.785	11078000
740	AADALSIIPGAVLR	14	A0A3B6JN62	Protein VAC14-like protein(predicted) OS=Triticum aestivum OX=4565 PE=4 SV=1	2W_2	2	704.912	0.14554	5.5806e-05	1	91.62	59997000
741	AADALSIIPGAVLR	14	A0A3B6JN62	Protein VAC14-like protein(predicted) OS=Triticum aestivum OX=4565 PE=4 SV=1	0W_3	2	704.912	0.43927	0.00053516	1	57.434	15542000
742	AADALSIIPGAVLR	14	A0A3B6JN62	Protein VAC14-like protein(predicted) OS=Triticum aestivum OX=4565 PE=4 SV=1	2W_3	2	704.912	0.22944	4.9206e-05	1	79.875	21286000
743	AADAPAAAAVAPPAR	15	A0A3B6GJX5	Eukaryotic translation initiation factor 3 subunit A OS=Triticum aestivum OX=4565 PE=3 SV=1	2W_1	2	660.357	-1.4371	0.001407	1	54.276	4919400
744	AADAPAAAAVAPPAR	15	A0A3B6GJX5	Eukaryotic translation initiation factor 3 subunit A OS=Triticum aestivum OX=4565 PE=3 SV=1	2W_2	2	660.357	-1.3475	0.00010607	1	74.475	8109500
745	AADAPAAAAVAPPAR	15	A0A3B6GJX5	Eukaryotic translation initiation factor 3 subunit A OS=Triticum aestivum OX=4565 PE=3 SV=1	0W_3	2	660.357	-1.93	0.0027567	1	49.298	2858500
746	AADAPAAAAVAPPAR	15	A0A3B6GJX5	Eukaryotic translation initiation factor 3 subunit A OS=Triticum aestivum OX=4565 PE=3 SV=1	2W_3	2	660.357	-0.41023	0.00013224	1	72.681	5705600
747	AADAPAAAAVAPPAR	15	A0A3B6GJX5	Eukaryotic translation initiation factor 3 subunit A OS=Triticum aestivum OX=4565 PE=3 SV=1	0W_1	2	660.357	-0.53805	NaN	0		1898200
748	AADAPAAAAVAPPAR	15	A0A3B6GJX5	Eukaryotic translation initiation factor 3 subunit A OS=Triticum aestivum OX=4565 PE=3 SV=1	0W_2	2	660.357	-1.1393	NaN	0		1472100
749	AADAPAAAAVAPPAR	15	A0A3B6GJX5	Eukaryotic translation initiation factor 3 subunit A OS=Triticum aestivum OX=4565 PE=3 SV=1	0W_3	2	660.357	1.1971	NaN	0		3052400
750	AADCVVPTFK	10	A0A3B6C0K1	Eukaryotic translation initiation factor 3 subunit M OS=Triticum aestivum OX=4565 PE=3 SV=1	0W_2	2	554.279	0.86965	0.033455	1	48.998	7195600
751	AADCVVPTFK	10	A0A3B6C0K1	Eukaryotic translation initiation factor 3 subunit M OS=Triticum aestivum OX=4565 PE=3 SV=1	2W_2	2	554.279	0.42658	0.0163	1	55.314	9244900
752	AADCVVPTFK	10	A0A3B6C0K1	Eukaryotic translation initiation factor 3 subunit M OS=Triticum aestivum OX=4565 PE=3 SV=1	0W_3	2	554.279	1.3333	0.0538	1	44.639	5859900
753	AADCVVPTFK	10	A0A3B6C0K1	Eukaryotic translation initiation factor 3 subunit M OS=Triticum aestivum OX=4565 PE=3 SV=1	2W_3	2	554.279	0.2467	0.0034385	1	73.499	14061000
754	AADCVVPTFK	10	A0A3B6C0K1	Eukaryotic translation initiation factor 3 subunit M OS=Triticum aestivum OX=4565 PE=3 SV=1	0W_1	2	554.279	0.24793	NaN	0		6261400
755	AADCVVPTFK	10	A0A3B6C0K1	Eukaryotic translation initiation factor 3 subunit M OS=Triticum aestivum OX=4565 PE=3 SV=1	2W_1	2	554.279	-0.087836	NaN	0		11552000
756	AADILSEESHLLTQSK	16	A0A3B6QPY2	FKS1_dom1 domain-containing protein OS=Triticum aestivum OX=4565 PE=4 SV=1	0W_1	3	581.304	2.0244	0.00066958	1	44.998	30203000
757	AADILSEESHLLTQSK	16	A0A3B6QPY2	FKS1_dom1 domain-containing protein OS=Triticum aestivum OX=4565 PE=4 SV=1	2W_1	3	581.304	0.71696	7.323e-06	1	87.138	44843000
758	AADILSEESHLLTQSK	16	A0A3B6QPY2	FKS1_dom1 domain-containing protein OS=Triticum aestivum OX=4565 PE=4 SV=1	0W_2	3	581.304	1.078	5.2916e-06	1	74.141	23555000
759	AADILSEESHLLTQSK	16	A0A3B6QPY2	FKS1_dom1 domain-containing protein OS=Triticum aestivum OX=4565 PE=4 SV=1	2W_2	3	581.304	0.93582	5.9899e-06	1	84.41	38245000
760	AADILSEESHLLTQSK	16	A0A3B6QPY2	FKS1_dom1 domain-containing protein OS=Triticum aestivum OX=4565 PE=4 SV=1	0W_3	3	581.304	0.92655	0.00042028	1	46.249	35916000
761	AADILSEESHLLTQSK	16	A0A3B6QPY2	FKS1_dom1 domain-containing protein OS=Triticum aestivum OX=4565 PE=4 SV=1	2W_3	3	581.304	0.85522	9.6223e-06	1	67.646	42485000
762	AADILVNFFEK	11	A0A3B6TMN0	Sucrose synthase OS=Triticum aestivum OX=4565 PE=3 SV=1	0W_1	2	633.84	-0.31932	0.047121	1	42.031	2845300
763	AADILVNFFEK	11	A0A3B6TMN0	Sucrose synthase OS=Triticum aestivum OX=4565 PE=3 SV=1	2W_1	2	633.84	-0.64858	0.0012997	1	80.245	57431000
764	AADILVNFFEK	11	A0A3B6TMN0	Sucrose synthase OS=Triticum aestivum OX=4565 PE=3 SV=1	0W_2	2	633.84	-0.74846	0.050972	1	42.629	4009500
765	AADILVNFFEK	11	A0A3B6TMN0	Sucrose synthase OS=Triticum aestivum OX=4565 PE=3 SV=1	2W_2	2	633.84	-0.23642	0.0011329	1	81.92	61965000
766	AADILVNFFEK	11	A0A3B6TMN0	Sucrose synthase OS=Triticum aestivum OX=4565 PE=3 SV=1	0W_3	2	633.84	-0.60716	0.018816	1	50.354	2568300
767	AADILVNFFEK	11	A0A3B6TMN0	Sucrose synthase OS=Triticum aestivum OX=4565 PE=3 SV=1	2W_3	2	633.84	-0.54035	0.0030278	1	66.267	57022000
768	AADKVVNPLFEK	12	A0A1D5Z340	Ribosomal_L7Ae domain-containing protein OS=Triticum aestivum OX=4565 PE=4 SV=1	2W_1	2	665.872	0.79795	0.005119	1	68.42	29524000
769	AADKVVNPLFEK	12	A0A1D5Z340	Ribosomal_L7Ae domain-containing protein OS=Triticum aestivum OX=4565 PE=4 SV=1	2W_1	3	444.25	-0.043893	0.00055632	1	65.809	98166000
770	AADKVVNPLFEK	12	A0A1D5Z340	Ribosomal_L7Ae domain-containing protein OS=Triticum aestivum OX=4565 PE=4 SV=1	0W_2	3	444.25	-0.34705	0.001543	1	56.569	64710000
771	AADKVVNPLFEK	12	A0A1D5Z340	Ribosomal_L7Ae domain-containing protein OS=Triticum aestivum OX=4565 PE=4 SV=1	2W_2	3	444.25	-0.020721	0.0011288	1	60.345	107360000
772	AADKVVNPLFEK	12	A0A1D5Z340	Ribosomal_L7Ae domain-containing protein OS=Triticum aestivum OX=4565 PE=4 SV=1	2W_3	2	665.872	0.95062	0.025562	1	55.724	32841000
773	AADKVVNPLFEK	12	A0A1D5Z340	Ribosomal_L7Ae domain-containing protein OS=Triticum aestivum OX=4565 PE=4 SV=1	2W_3	3	444.25	-0.27958	0.0012461	1	59.225	100310000
774	AADKVVNPLFEK	12	A0A1D5Z340	Ribosomal_L7Ae domain-containing protein OS=Triticum aestivum OX=4565 PE=4 SV=1	0W_1	3	444.25	-0.83905	NaN	0		66865000
775	AADKVVNPLFEK	12	A0A1D5Z340	Ribosomal_L7Ae domain-containing protein OS=Triticum aestivum OX=4565 PE=4 SV=1	0W_2	2	665.872	0.65478	NaN	0		16789000
776	AADKVVNPLFEK	12	A0A1D5Z340	Ribosomal_L7Ae domain-containing protein OS=Triticum aestivum OX=4565 PE=4 SV=1	2W_2	2	665.872	0.56257	NaN	0		30889000
777	AADKVVNPLFEK	12	A0A1D5Z340	Ribosomal_L7Ae domain-containing protein OS=Triticum aestivum OX=4565 PE=4 SV=1	0W_3	2	665.872	0.78939	NaN	0		16665000
778	AADKVVNPLFEK	12	A0A1D5Z340	Ribosomal_L7Ae domain-containing protein OS=Triticum aestivum OX=4565 PE=4 SV=1	0W_3	3	444.25	0.17107	NaN	0		71852000
779	AADLDIASVLGMGFPK	16	A0A3B6PIU6	3-hydroxyacyl-CoA dehydrogenase(predicted) OS=Triticum aestivum OX=4565 PE=3 SV=1	2W_1	2	810.919	-0.81969	0.0012689	1	45.084	10720000
780	AADLDIASVLGMGFPK	16	A0A3B6PIU6	3-hydroxyacyl-CoA dehydrogenase(predicted) OS=Triticum aestivum OX=4565 PE=3 SV=1	2W_2	2	810.919	-0.63981	0.00066818	1	48.405	10850000
781	AADLDIASVLGMGFPK	16	A0A3B6PIU6	3-hydroxyacyl-CoA dehydrogenase(predicted) OS=Triticum aestivum OX=4565 PE=3 SV=1	0W_1	2	810.919	3.0616	NaN	0		655550
782	AADLDIASVLGMGFPK	16	A0A3B6PIU6	3-hydroxyacyl-CoA dehydrogenase(predicted) OS=Triticum aestivum OX=4565 PE=3 SV=1	2W_1	2	810.919	-2.0634	NaN	0		1926600
783	AADLDIASVLGMGFPK	16	A0A3B6PIU6	3-hydroxyacyl-CoA dehydrogenase(predicted) OS=Triticum aestivum OX=4565 PE=3 SV=1	0W_2	2	810.919	-2.099	NaN	0		904910
784	AADLDIASVLGMGFPK	16	A0A3B6PIU6	3-hydroxyacyl-CoA dehydrogenase(predicted) OS=Triticum aestivum OX=4565 PE=3 SV=1	0W_2	2	810.919	-1.2209	NaN	0		524740
785	AADLDIASVLGMGFPK	16	A0A3B6PIU6	3-hydroxyacyl-CoA dehydrogenase(predicted) OS=Triticum aestivum OX=4565 PE=3 SV=1	0W_2	2	810.919	-0.99949	NaN	0		1620800
786	AADLDIASVLGMGFPK	16	A0A3B6PIU6	3-hydroxyacyl-CoA dehydrogenase(predicted) OS=Triticum aestivum OX=4565 PE=3 SV=1	0W_3	2	810.919	-0.74874	NaN	0		847700
787	AADLDIASVLGMGFPK	16	A0A3B6PIU6	3-hydroxyacyl-CoA dehydrogenase(predicted) OS=Triticum aestivum OX=4565 PE=3 SV=1	2W_3	2	810.919	-0.95666	NaN	0		8971600
788	AADLDIASVLGMGFPK	16	A0A3B6PIU6	3-hydroxyacyl-CoA dehydrogenase(predicted) OS=Triticum aestivum OX=4565 PE=3 SV=1	2W_1	2	802.921	-0.55033	2.4366e-05	1	93.237	22208000
789	AADLDIASVLGMGFPK	16	A0A3B6PIU6	3-hydroxyacyl-CoA dehydrogenase(predicted) OS=Triticum aestivum OX=4565 PE=3 SV=1	2W_2	2	802.921	-0.15733	1.5999e-05	1	95.57	26363000
790	AADLDIASVLGMGFPK	16	A0A3B6PIU6	3-hydroxyacyl-CoA dehydrogenase(predicted) OS=Triticum aestivum OX=4565 PE=3 SV=1	2W_3	2	802.921	-0.063965	2.349e-05	1	81.448	21662000
791	AADLDIASVLGMGFPK	16	A0A3B6PIU6	3-hydroxyacyl-CoA dehydrogenase(predicted) OS=Triticum aestivum OX=4565 PE=3 SV=1	0W_1	2	802.921	-0.27815	NaN	0		4739500
792	AADLDIASVLGMGFPK	16	A0A3B6PIU6	3-hydroxyacyl-CoA dehydrogenase(predicted) OS=Triticum aestivum OX=4565 PE=3 SV=1	0W_2	2	802.921	-0.35795	NaN	0		4226600
793	AADLDIASVLGMGFPK	16	A0A3B6PIU6	3-hydroxyacyl-CoA dehydrogenase(predicted) OS=Triticum aestivum OX=4565 PE=3 SV=1	0W_3	2	802.921	0.016316	NaN	0		3318300
794	AADLFNPQLER	11	A0A3B6C9H3	Lipase_GDSL domain-containing protein OS=Triticum aestivum OX=4565 PE=4 SV=1	0W_1	2	637.33	-0.025985	0.0019745	1	73.435	6964800
795	AADLFNPQLER	11	A0A3B6C9H3	Lipase_GDSL domain-containing protein OS=Triticum aestivum OX=4565 PE=4 SV=1	2W_1	2	637.33	1.1201	0.0083414	1	56.087	10663000
796	AADLFNPQLER	11	A0A3B6C9H3	Lipase_GDSL domain-containing protein OS=Triticum aestivum OX=4565 PE=4 SV=1	0W_2	2	637.33	0.32354	0.00056045	1	87.667	8999200
797	AADLFNPQLER	11	A0A3B6C9H3	Lipase_GDSL domain-containing protein OS=Triticum aestivum OX=4565 PE=4 SV=1	2W_2	2	637.33	0.57622	0.0021977	1	71.176	11386000
798	AADLFNPQLER	11	A0A3B6C9H3	Lipase_GDSL domain-containing protein OS=Triticum aestivum OX=4565 PE=4 SV=1	2W_3	2	637.33	0.51601	0.0037594	1	64.64	11627000
799	AADLFNPQLER	11	A0A3B6C9H3	Lipase_GDSL domain-containing protein OS=Triticum aestivum OX=4565 PE=4 SV=1	0W_3	2	637.33	0.53881	NaN	0		10010000
800	AADLFNPQLER	11	A0A3B6C9H3	Lipase_GDSL domain-containing protein OS=Triticum aestivum OX=4565 PE=4 SV=1	2W_3	2	637.33	0.38998	NaN	0		864950
801	AADLGVESIVIGMPHR	16	A0A3B6C6P4	Transket_pyr domain-containing protein OS=Triticum aestivum OX=4565 PE=4 SV=1	0W_1	3	560.963	-0.39328	0.00068067	1	44.925	37383000
802	AADLGVESIVIGMPHR	16	A0A3B6C6P4	Transket_pyr domain-containing protein OS=Triticum aestivum OX=4565 PE=4 SV=1	0W_1	3	560.963	-0.1744	0.00024368	1	51.03	28672000
803	AADLGVESIVIGMPHR	16	A0A3B6C6P4	Transket_pyr domain-containing protein OS=Triticum aestivum OX=4565 PE=4 SV=1	2W_1	3	560.963	-0.25654	0.00021695	1	51.771	51044000
804	AADLGVESIVIGMPHR	16	A0A3B6C6P4	Transket_pyr domain-containing protein OS=Triticum aestivum OX=4565 PE=4 SV=1	2W_1	3	560.963	-0.81433	0.00068067	1	44.925	42444000
805	AADLGVESIVIGMPHR	16	A0A3B6C6P4	Transket_pyr domain-containing protein OS=Triticum aestivum OX=4565 PE=4 SV=1	0W_2	3	560.963	-0.94824	0.0009999	1	43.592	33101000
806	AADLGVESIVIGMPHR	16	A0A3B6C6P4	Transket_pyr domain-containing protein OS=Triticum aestivum OX=4565 PE=4 SV=1	0W_3	3	560.963	-0.36405	0.0013233	1	42.242	23194000
807	AADLGVESIVIGMPHR	16	A0A3B6C6P4	Transket_pyr domain-containing protein OS=Triticum aestivum OX=4565 PE=4 SV=1	0W_3	3	560.963	-0.78994	0.00024368	1	51.03	33422000
808	AADLGVESIVIGMPHR	16	A0A3B6C6P4	Transket_pyr domain-containing protein OS=Triticum aestivum OX=4565 PE=4 SV=1	0W_1	3	555.631	-0.050233	5.7006e-06	1	91.812	180670000
809	AADLGVESIVIGMPHR	16	A0A3B6C6P4	Transket_pyr domain-containing protein OS=Triticum aestivum OX=4565 PE=4 SV=1	0W_1	2	832.943	0.13734	1.8019e-06	1	103.79	16209000
810	AADLGVESIVIGMPHR	16	A0A3B6C6P4	Transket_pyr domain-containing protein OS=Triticum aestivum OX=4565 PE=4 SV=1	2W_1	2	832.943	0.071968	4.1138e-05	1	88.561	12330000
811	AADLGVESIVIGMPHR	16	A0A3B6C6P4	Transket_pyr domain-containing protein OS=Triticum aestivum OX=4565 PE=4 SV=1	2W_1	3	555.631	-0.059932	0.00019146	1	52.527	125720000
812	AADLGVESIVIGMPHR	16	A0A3B6C6P4	Transket_pyr domain-containing protein OS=Triticum aestivum OX=4565 PE=4 SV=1	0W_2	3	555.631	-0.44254	5.639e-06	1	83.692	133950000
813	AADLGVESIVIGMPHR	16	A0A3B6C6P4	Transket_pyr domain-containing protein OS=Triticum aestivum OX=4565 PE=4 SV=1	0W_2	2	832.943	-0.44974	1.8389e-09	1	115.91	9923600
814	AADLGVESIVIGMPHR	16	A0A3B6C6P4	Transket_pyr domain-containing protein OS=Triticum aestivum OX=4565 PE=4 SV=1	2W_2	3	555.631	0.27518	8.3709e-10	1	109.83	106360000
815	AADLGVESIVIGMPHR	16	A0A3B6C6P4	Transket_pyr domain-containing protein OS=Triticum aestivum OX=4565 PE=4 SV=1	2W_2	2	832.943		1.1589e-18	1	106.14	0
816	AADLGVESIVIGMPHR	16	A0A3B6C6P4	Transket_pyr domain-containing protein OS=Triticum aestivum OX=4565 PE=4 SV=1	0W_3	2	832.943		4.2324e-08	1	83.633	0
817	AADLGVESIVIGMPHR	16	A0A3B6C6P4	Transket_pyr domain-containing protein OS=Triticum aestivum OX=4565 PE=4 SV=1	2W_3	3	555.631	-0.26031	0.0024172	1	37.77	115090000
818	AADLGVESIVIGMPHR	16	A0A3B6C6P4	Transket_pyr domain-containing protein OS=Triticum aestivum OX=4565 PE=4 SV=1	2W_3	2	832.943		1.7124e-26	1	117.2	0
819	AADLGVESIVIGMPHR	16	A0A3B6C6P4	Transket_pyr domain-containing protein OS=Triticum aestivum OX=4565 PE=4 SV=1	0W_1	3	555.631	-0.027702	NaN	0		901060000
820	AADLGVESIVIGMPHR	16	A0A3B6C6P4	Transket_pyr domain-containing protein OS=Triticum aestivum OX=4565 PE=4 SV=1	2W_1	3	555.631	0.061854	NaN	0		602600
821	AADLGVESIVIGMPHR	16	A0A3B6C6P4	Transket_pyr domain-containing protein OS=Triticum aestivum OX=4565 PE=4 SV=1	2W_1	3	555.631	1.9987	NaN	0		1822700
822	AADLGVESIVIGMPHR	16	A0A3B6C6P4	Transket_pyr domain-containing protein OS=Triticum aestivum OX=4565 PE=4 SV=1	0W_3	3	555.631	-0.11079	NaN	0		2176100
823	AADLGVESIVIGMPHR	16	A0A3B6C6P4	Transket_pyr domain-containing protein OS=Triticum aestivum OX=4565 PE=4 SV=1	2W_3	3	555.631	-0.023384	NaN	0		2375200
824	AADLSISPVHR	11	A0A3B5ZSX8	DNA ligase OS=Triticum aestivum OX=4565 PE=3 SV=1	0W_1	2	583.32	-0.97253	0.0018236	1	74.962	15144000
825	AADLSISPVHR	11	A0A3B5ZSX8	DNA ligase OS=Triticum aestivum OX=4565 PE=3 SV=1	2W_1	2	583.32	-3.1825	0.013547	1	53.237	12591000
826	AADLSISPVHR	11	A0A3B5ZSX8	DNA ligase OS=Triticum aestivum OX=4565 PE=3 SV=1	2W_2	2	583.32	-3.3509	0.0022472	1	70.675	14661000
827	AADLSISPVHR	11	A0A3B5ZSX8	DNA ligase OS=Triticum aestivum OX=4565 PE=3 SV=1	0W_3	3	389.216	0.27087	0.040961	1	30.205	22174000
828	AADLSISPVHR	11	A0A3B5ZSX8	DNA ligase OS=Triticum aestivum OX=4565 PE=3 SV=1	0W_3	2	583.32	-0.85976	0.0023464	1	69.672	11851000
829	AADLSISPVHR	11	A0A3B5ZSX8	DNA ligase OS=Triticum aestivum OX=4565 PE=3 SV=1	2W_3	3	389.216	-0.13362	0.0079164	1	44.024	31685000
830	AADLSISPVHR	11	A0A3B5ZSX8	DNA ligase OS=Triticum aestivum OX=4565 PE=3 SV=1	2W_3	2	583.32	-0.79347	0.019582	1	49.934	16320000
831	AADLSISPVHR	11	A0A3B5ZSX8	DNA ligase OS=Triticum aestivum OX=4565 PE=3 SV=1	0W_1	3	389.216	0.36841	NaN	0		22516000
832	AADLSISPVHR	11	A0A3B5ZSX8	DNA ligase OS=Triticum aestivum OX=4565 PE=3 SV=1	2W_1	3	389.216	0.29578	NaN	0		27525000
833	AADLSISPVHR	11	A0A3B5ZSX8	DNA ligase OS=Triticum aestivum OX=4565 PE=3 SV=1	0W_2	2	583.32	-0.8032	NaN	0		17608000
834	AADLSISPVHR	11	A0A3B5ZSX8	DNA ligase OS=Triticum aestivum OX=4565 PE=3 SV=1	0W_2	3	389.216	-0.1002	NaN	0		27888000
835	AADLSISPVHR	11	A0A3B5ZSX8	DNA ligase OS=Triticum aestivum OX=4565 PE=3 SV=1	2W_2	3	389.216	0.22618	NaN	0		29630000
836	AADLTYWESAAR	12	A0A3B6MZI6	UDP-glucose 6-dehydrogenase OS=Triticum aestivum OX=4565 PE=3 SV=1	0W_1	2	677.325	0.42457	0.00086247	1	70.089	93675000
837	AADLTYWESAAR	12	A0A3B6MZI6	UDP-glucose 6-dehydrogenase OS=Triticum aestivum OX=4565 PE=3 SV=1	2W_1	2	677.325	-0.16655	0.0024759	1	61.11	176090000
838	AADLTYWESAAR	12	A0A3B6MZI6	UDP-glucose 6-dehydrogenase OS=Triticum aestivum OX=4565 PE=3 SV=1	0W_2	2	677.325	0.092756	0.00089781	1	69.03	100790000
839	AADLTYWESAAR	12	A0A3B6MZI6	UDP-glucose 6-dehydrogenase OS=Triticum aestivum OX=4565 PE=3 SV=1	2W_2	2	677.325	-0.073334	0.00087744	1	69.641	206040000
840	AADLTYWESAAR	12	A0A3B6MZI6	UDP-glucose 6-dehydrogenase OS=Triticum aestivum OX=4565 PE=3 SV=1	0W_3	2	677.325	-0.064956	0.00058546	1	78.324	92033000
841	AADLTYWESAAR	12	A0A3B6MZI6	UDP-glucose 6-dehydrogenase OS=Triticum aestivum OX=4565 PE=3 SV=1	2W_3	2	677.325	-0.3861	0.01504	1	45.28	206640000
842	AADNQLFVATCAPAR	15	A0A3B6JN63	CN hydrolase domain-containing protein OS=Triticum aestivum OX=4565 PE=4 SV=1	0W_1	2	802.896	0.068293	1.2493e-05	1	100.11	18064000
843	AADNQLFVATCAPAR	15	A0A3B6JN63	CN hydrolase domain-containing protein OS=Triticum aestivum OX=4565 PE=4 SV=1	2W_1	2	802.896	-0.10765	9.8105e-10	1	119.87	29440000
844	AADNQLFVATCAPAR	15	A0A3B6JN63	CN hydrolase domain-containing protein OS=Triticum aestivum OX=4565 PE=4 SV=1	0W_2	2	802.896	-0.14634	6.2794e-05	1	78.505	17873000
845	AADNQLFVATCAPAR	15	A0A3B6JN63	CN hydrolase domain-containing protein OS=Triticum aestivum OX=4565 PE=4 SV=1	2W_2	2	802.896	-0.1182	1.9019e-13	1	127.36	30982000
846	AADNQLFVATCAPAR	15	A0A3B6JN63	CN hydrolase domain-containing protein OS=Triticum aestivum OX=4565 PE=4 SV=1	0W_3	2	802.896	0.47735	6.2794e-05	1	78.505	21547000
847	AADNQLFVATCAPAR	15	A0A3B6JN63	CN hydrolase domain-containing protein OS=Triticum aestivum OX=4565 PE=4 SV=1	2W_3	2	802.896	-0.21975	3.1451e-06	1	107.35	32132000
848	AADPLTSWSAAAR	13	A0A3B6C9B9	Trafficking protein particle complex II-specific subunit 120 homolog(predicted) OS=Triticum aestivum OX=4565 PE=4 SV=1	2W_1	2	658.833	1.4811	0.057615	1	34.611	7504000
849	AADPLTSWSAAAR	13	A0A3B6C9B9	Trafficking protein particle complex II-specific subunit 120 homolog(predicted) OS=Triticum aestivum OX=4565 PE=4 SV=1	0W_2	2	658.833	0.38641	0.057217	1	36.292	4557000
850	AADPLTSWSAAAR	13	A0A3B6C9B9	Trafficking protein particle complex II-specific subunit 120 homolog(predicted) OS=Triticum aestivum OX=4565 PE=4 SV=1	2W_2	2	658.833	-0.10229	0.026728	1	40.941	7772000
851	AADPLTSWSAAAR	13	A0A3B6C9B9	Trafficking protein particle complex II-specific subunit 120 homolog(predicted) OS=Triticum aestivum OX=4565 PE=4 SV=1	0W_3	2	658.833	0.71843	0.00041302	1	67.997	5586700
852	AADPLTSWSAAAR	13	A0A3B6C9B9	Trafficking protein particle complex II-specific subunit 120 homolog(predicted) OS=Triticum aestivum OX=4565 PE=4 SV=1	2W_3	2	658.833	0.92787	0.044728	1	35.657	7538900
853	AADPLTSWSAAAR	13	A0A3B6C9B9	Trafficking protein particle complex II-specific subunit 120 homolog(predicted) OS=Triticum aestivum OX=4565 PE=4 SV=1	0W_1	2	658.833	0.50458	NaN	0		5336600
854	AADPVLFISTHMR	13	A0A3B6JIZ2	Enolase-like protein(predicted) OS=Triticum aestivum OX=4565 PE=3 SV=1	0W_2	3	486.591	0.45346	0.0080467	1	36.572	3179600
855	AADPVLFISTHMR	13	A0A3B6JIZ2	Enolase-like protein(predicted) OS=Triticum aestivum OX=4565 PE=3 SV=1	2W_2	3	486.591	0.33479	0.0076689	1	37.146	4879400
856	AADPVLFISTHMR	13	A0A3B6JIZ2	Enolase-like protein(predicted) OS=Triticum aestivum OX=4565 PE=3 SV=1	0W_3	3	486.591	0.45836	0.042865	1	24.425	4883300
857	AADPVLFISTHMR	13	A0A3B6JIZ2	Enolase-like protein(predicted) OS=Triticum aestivum OX=4565 PE=3 SV=1	2W_3	3	486.591	0.58192	0.042865	1	24.425	6478700
858	AADPVLFISTHMR	13	A0A3B6JIZ2	Enolase-like protein(predicted) OS=Triticum aestivum OX=4565 PE=3 SV=1	0W_1	3	486.591	0.45047	NaN	0		4146500
859	AADPVLFISTHMR	13	A0A3B6JIZ2	Enolase-like protein(predicted) OS=Triticum aestivum OX=4565 PE=3 SV=1	2W_1	3	486.591	0.52331	NaN	0		7305500
860	AADSVSVCLSK	11	A0A3B6CA57	Beta_elim_lyase domain-containing protein OS=Triticum aestivum OX=4565 PE=4 SV=1	2W_1	2	568.784		0.00083782	1	69.864	0
861	AADSVSVCLSK	11	A0A3B6CA57	Beta_elim_lyase domain-containing protein OS=Triticum aestivum OX=4565 PE=4 SV=1	2W_2	2	568.784	1.3973	0.00063581	1	86.911	33555000
862	AADSVSVCLSK	11	A0A3B6CA57	Beta_elim_lyase domain-containing protein OS=Triticum aestivum OX=4565 PE=4 SV=1	0W_3	2	568.784	1.0641	0.012112	1	54.023	11769000
863	AADSVSVCLSK	11	A0A3B6CA57	Beta_elim_lyase domain-containing protein OS=Triticum aestivum OX=4565 PE=4 SV=1	2W_3	2	568.784	0.98682	0.0047948	1	62.338	36110000
864	AADSVSVCLSK	11	A0A3B6CA57	Beta_elim_lyase domain-containing protein OS=Triticum aestivum OX=4565 PE=4 SV=1	0W_1	2	568.784	2.6096	NaN	0		19445000
865	AADSVSVCLSK	11	A0A3B6CA57	Beta_elim_lyase domain-containing protein OS=Triticum aestivum OX=4565 PE=4 SV=1	0W_2	2	568.784	1.9105	NaN	0		15697000
866	AADTTKPLFPAAPHTSLLPSHGNANR	26	A0A3B6RSD0	WD_REPEATS_REGION domain-containing protein OS=Triticum aestivum OX=4565 PE=4 SV=1	2W_1	4	682.356	0.11171	2.2996e-07	1	53.481	16388000
867	AADTTKPLFPAAPHTSLLPSHGNANR	26	A0A3B6RSD0	WD_REPEATS_REGION domain-containing protein OS=Triticum aestivum OX=4565 PE=4 SV=1	2W_3	4	682.356	1.1242	2.2996e-07	1	53.481	19392000
868	AADTTKPLFPAAPHTSLLPSHGNANR	26	A0A3B6RSD0	WD_REPEATS_REGION domain-containing protein OS=Triticum aestivum OX=4565 PE=4 SV=1	0W_1	4	682.356	1.2508	NaN	0		11867000
869	AADTTKPLFPAAPHTSLLPSHGNANR	26	A0A3B6RSD0	WD_REPEATS_REGION domain-containing protein OS=Triticum aestivum OX=4565 PE=4 SV=1	0W_2	4	682.356	1.5391	NaN	0		9421400
870	AADTTKPLFPAAPHTSLLPSHGNANR	26	A0A3B6RSD0	WD_REPEATS_REGION domain-containing protein OS=Triticum aestivum OX=4565 PE=4 SV=1	0W_3	4	682.356	0.49635	NaN	0		9343500
871	AADVGADLVGKVER	14	A0A3B5YTP0	Pyrophosphate-energized vacuolar membrane proton pump(predicted) OS=Triticum aestivum OX=4565 PE=3 SV=1	0W_1	3	467.256	-0.23225	9.2816e-09	1	112.42	178280000
872	AADVGADLVGKVER	14	A0A3B5YTP0	Pyrophosphate-energized vacuolar membrane proton pump(predicted) OS=Triticum aestivum OX=4565 PE=3 SV=1	0W_1	2	700.381	-0.9536	0.0030245	1	55.011	44163000
873	AADVGADLVGKVER	14	A0A3B5YTP0	Pyrophosphate-energized vacuolar membrane proton pump(predicted) OS=Triticum aestivum OX=4565 PE=3 SV=1	2W_1	3	467.256	-0.32432	1.2294e-08	1	109.83	326370000
874	AADVGADLVGKVER	14	A0A3B5YTP0	Pyrophosphate-energized vacuolar membrane proton pump(predicted) OS=Triticum aestivum OX=4565 PE=3 SV=1	2W_1	2	700.381	-0.41416	0.00090919	1	84.759	68957000
875	AADVGADLVGKVER	14	A0A3B5YTP0	Pyrophosphate-energized vacuolar membrane proton pump(predicted) OS=Triticum aestivum OX=4565 PE=3 SV=1	0W_2	2	700.381	-0.93202	0.0068119	1	58.723	36060000
876	AADVGADLVGKVER	14	A0A3B5YTP0	Pyrophosphate-energized vacuolar membrane proton pump(predicted) OS=Triticum aestivum OX=4565 PE=3 SV=1	0W_2	3	467.256	-0.060267	4.3415e-20	1	140.82	164350000
877	AADVGADLVGKVER	14	A0A3B5YTP0	Pyrophosphate-energized vacuolar membrane proton pump(predicted) OS=Triticum aestivum OX=4565 PE=3 SV=1	2W_2	3	467.256	-0.16392	6.5504e-05	1	83.692	347110000
878	AADVGADLVGKVER	14	A0A3B5YTP0	Pyrophosphate-energized vacuolar membrane proton pump(predicted) OS=Triticum aestivum OX=4565 PE=3 SV=1	2W_2	2	700.381	-0.062349	1.1974e-08	1	119.62	102750000
879	AADVGADLVGKVER	14	A0A3B5YTP0	Pyrophosphate-energized vacuolar membrane proton pump(predicted) OS=Triticum aestivum OX=4565 PE=3 SV=1	0W_3	3	467.256	-0.12527	7.4601e-05	1	89.507	156140000
880	AADVGADLVGKVER	14	A0A3B5YTP0	Pyrophosphate-energized vacuolar membrane proton pump(predicted) OS=Triticum aestivum OX=4565 PE=3 SV=1	0W_3	2	700.381	-0.6392	0.00098059	1	74.789	39798000
881	AADVGADLVGKVER	14	A0A3B5YTP0	Pyrophosphate-energized vacuolar membrane proton pump(predicted) OS=Triticum aestivum OX=4565 PE=3 SV=1	2W_3	2	700.381	-0.24089	0.0017671	1	68.283	132740000
882	AADVGADLVGKVER	14	A0A3B5YTP0	Pyrophosphate-energized vacuolar membrane proton pump(predicted) OS=Triticum aestivum OX=4565 PE=3 SV=1	2W_3	3	467.256	-0.38255	3.3087e-13	1	122.64	348570000
883	AADVGADLVGKVER	14	A0A3B5YTP0	Pyrophosphate-energized vacuolar membrane proton pump(predicted) OS=Triticum aestivum OX=4565 PE=3 SV=1	2W_3	2	700.381	-5.0595	NaN	0		1789200
884	AADVIQYLER	10	A0A3B6LKA8	CCR4-NOT transcription complex subunit 10(predicted) OS=Triticum aestivum OX=4565 PE=4 SV=1	0W_1	2	589.314	-0.25884	0.0010942	1	87.568	26701000
885	AADVIQYLER	10	A0A3B6LKA8	CCR4-NOT transcription complex subunit 10(predicted) OS=Triticum aestivum OX=4565 PE=4 SV=1	2W_1	2	589.314	0.33874	2.2922e-06	1	150.61	50973000
886	AADVIQYLER	10	A0A3B6LKA8	CCR4-NOT transcription complex subunit 10(predicted) OS=Triticum aestivum OX=4565 PE=4 SV=1	0W_2	2	589.314	0.19201	0.029773	1	50.353	33028000
887	AADVIQYLER	10	A0A3B6LKA8	CCR4-NOT transcription complex subunit 10(predicted) OS=Triticum aestivum OX=4565 PE=4 SV=1	2W_2	2	589.314	0.54698	6.0205e-05	1	125.75	51655000
888	AADVIQYLER	10	A0A3B6LKA8	CCR4-NOT transcription complex subunit 10(predicted) OS=Triticum aestivum OX=4565 PE=4 SV=1	0W_3	2	589.314	0.54593	5.8426e-05	1	121.6	28817000
889	AADVIQYLER	10	A0A3B6LKA8	CCR4-NOT transcription complex subunit 10(predicted) OS=Triticum aestivum OX=4565 PE=4 SV=1	2W_3	2	589.314	0.64345	0.00023531	1	97.813	57979000
890	AADVTGYSSSSVELR	15	A0A3B5YVU3	KH domain-containing protein(predicted) OS=Triticum aestivum OX=4565 PE=4 SV=1	2W_1	2	771.376	-0.18648	0.00060868	1	59.709	7069500
891	AADVTGYSSSSVELR	15	A0A3B5YVU3	KH domain-containing protein(predicted) OS=Triticum aestivum OX=4565 PE=4 SV=1	2W_2	2	771.376	-0.073902	0.00056443	1	60.549	9243000
892	AADVTGYSSSSVELR	15	A0A3B5YVU3	KH domain-containing protein(predicted) OS=Triticum aestivum OX=4565 PE=4 SV=1	2W_3	2	771.376	-0.14314	7.4454e-05	1	79.652	8219800
893	AADVTGYSSSSVELR	15	A0A3B5YVU3	KH domain-containing protein(predicted) OS=Triticum aestivum OX=4565 PE=4 SV=1	0W_2	2	771.376	0.16321	NaN	0		2064700
894	AADVTGYSSSSVELR	15	A0A3B5YVU3	KH domain-containing protein(predicted) OS=Triticum aestivum OX=4565 PE=4 SV=1	0W_3	2	771.376	-0.90453	NaN	0		1819000
895	AAEACEEFSGVLVTLR	16	A0A3B6I1L7	Succinate dehydrogenase subunit 5, mitochondrial(predicted) OS=Triticum aestivum OX=4565 PE=4 SV=1	2W_1	2	876.435	-3.5098	0.0083508	1	41.088	4830300
896	AAEACEEFSGVLVTLR	16	A0A3B6I1L7	Succinate dehydrogenase subunit 5, mitochondrial(predicted) OS=Triticum aestivum OX=4565 PE=4 SV=1	2W_2	2	876.435	-3.6138	NaN	0		5808000
897	AAEACEEFSGVLVTLR	16	A0A3B6I1L7	Succinate dehydrogenase subunit 5, mitochondrial(predicted) OS=Triticum aestivum OX=4565 PE=4 SV=1	2W_3	2	876.435	-3.5151	NaN	0		3479400
898	AAEAGFINSNAAVAK	15	A0A3B6AS77	Nucleoside-triphosphatase(predicted) OS=Triticum aestivum OX=4565 PE=3 SV=1	0W_1	2	717.373	0.70203	0.00011542	1	73.834	13711000
899	AAEAGFINSNAAVAK	15	A0A3B6AS77	Nucleoside-triphosphatase(predicted) OS=Triticum aestivum OX=4565 PE=3 SV=1	2W_1	2	717.373	0.37568	0.00056443	1	60.549	15969000
900	AAEAGFINSNAAVAK	15	A0A3B6AS77	Nucleoside-triphosphatase(predicted) OS=Triticum aestivum OX=4565 PE=3 SV=1	0W_2	2	717.373	0.60489	0.0020862	1	51.771	12557000
901	AAEAGFINSNAAVAK	15	A0A3B6AS77	Nucleoside-triphosphatase(predicted) OS=Triticum aestivum OX=4565 PE=3 SV=1	2W_2	2	717.373	0.50205	9.46e-05	1	81.632	14074000
902	AAEAGFINSNAAVAK	15	A0A3B6AS77	Nucleoside-triphosphatase(predicted) OS=Triticum aestivum OX=4565 PE=3 SV=1	0W_3	2	717.373	0.51079	0.00021746	1	67.136	16544000
903	AAEAGFINSNAAVAK	15	A0A3B6AS77	Nucleoside-triphosphatase(predicted) OS=Triticum aestivum OX=4565 PE=3 SV=1	2W_3	2	717.373	0.60561	0.00024181	1	66.674	16312000
904	AAEAGGDKAPVVDVSQFGYFK	21	A0A3B6C571	Ribosomal_L18e/L15P domain-containing protein OS=Triticum aestivum OX=4565 PE=3 SV=1	0W_1	3	719.36	0.27462	0.000481	1	56.882	465180000
905	AAEAGGDKAPVVDVSQFGYFK	21	A0A3B6C571	Ribosomal_L18e/L15P domain-containing protein OS=Triticum aestivum OX=4565 PE=3 SV=1	0W_1	2	1078.54	0.51835	0.010824	1	43.164	18920000
906	AAEAGGDKAPVVDVSQFGYFK	21	A0A3B6C571	Ribosomal_L18e/L15P domain-containing protein OS=Triticum aestivum OX=4565 PE=3 SV=1	2W_1	3	719.36	0.28285	2.6019e-05	1	69.779	750220000
907	AAEAGGDKAPVVDVSQFGYFK	21	A0A3B6C571	Ribosomal_L18e/L15P domain-containing protein OS=Triticum aestivum OX=4565 PE=3 SV=1	2W_1	2	1078.54	0.11518	0.0023677	1	63.869	36121000
908	AAEAGGDKAPVVDVSQFGYFK	21	A0A3B6C571	Ribosomal_L18e/L15P domain-containing protein OS=Triticum aestivum OX=4565 PE=3 SV=1	0W_2	3	719.36	0.36268	0.0006404	1	46.415	325760000
909	AAEAGGDKAPVVDVSQFGYFK	21	A0A3B6C571	Ribosomal_L18e/L15P domain-containing protein OS=Triticum aestivum OX=4565 PE=3 SV=1	2W_2	3	719.36	0.37682	0.00015171	1	64.522	999050000
910	AAEAGGDKAPVVDVSQFGYFK	21	A0A3B6C571	Ribosomal_L18e/L15P domain-containing protein OS=Triticum aestivum OX=4565 PE=3 SV=1	2W_2	2	1078.54	0.12303	0.0016214	1	65.184	36033000
911	AAEAGGDKAPVVDVSQFGYFK	21	A0A3B6C571	Ribosomal_L18e/L15P domain-containing protein OS=Triticum aestivum OX=4565 PE=3 SV=1	0W_3	3	719.36	-0.066454	0.00041217	1	58.479	351540000
912	AAEAGGDKAPVVDVSQFGYFK	21	A0A3B6C571	Ribosomal_L18e/L15P domain-containing protein OS=Triticum aestivum OX=4565 PE=3 SV=1	0W_3	2	1078.54	0.2587	0.011675	1	42.123	14068000
913	AAEAGGDKAPVVDVSQFGYFK	21	A0A3B6C571	Ribosomal_L18e/L15P domain-containing protein OS=Triticum aestivum OX=4565 PE=3 SV=1	2W_3	3	719.36	0.14834	0.00039683	1	58.835	768670000
914	AAEAGGDKAPVVDVSQFGYFK	21	A0A3B6C571	Ribosomal_L18e/L15P domain-containing protein OS=Triticum aestivum OX=4565 PE=3 SV=1	2W_3	2	1078.54	0.051142	4.2288e-07	1	83.871	28253000
915	AAEAGGDKAPVVDVSQFGYFK	21	A0A3B6C571	Ribosomal_L18e/L15P domain-containing protein OS=Triticum aestivum OX=4565 PE=3 SV=1	0W_2	2	1078.54	0.67033	NaN	0		8193500
916	AAEAGGDKAPVVDVSQFGYFK	21	A0A3B6C571	Ribosomal_L18e/L15P domain-containing protein OS=Triticum aestivum OX=4565 PE=3 SV=1	2W_3	2	1078.54	-1.374	NaN	0		1929000
917	AAECRPVQNLLFSDCR	16	A0A3B6TQA1	Polysacc_synt_4 domain-containing protein OS=Triticum aestivum OX=4565 PE=4 SV=1	0W_1	3	645.977	-0.046043	5.7386e-07	1	105.28	21166000
918	AAECRPVQNLLFSDCR	16	A0A3B6TQA1	Polysacc_synt_4 domain-containing protein OS=Triticum aestivum OX=4565 PE=4 SV=1	0W_2	3	645.977	-0.24959	1.4808e-06	1	99.055	22355000
919	AAECRPVQNLLFSDCR	16	A0A3B6TQA1	Polysacc_synt_4 domain-containing protein OS=Triticum aestivum OX=4565 PE=4 SV=1	2W_1	3	645.977	0.037682	NaN	0		32020000
920	AAECRPVQNLLFSDCR	16	A0A3B6TQA1	Polysacc_synt_4 domain-containing protein OS=Triticum aestivum OX=4565 PE=4 SV=1	2W_2	3	645.977	0.10279	NaN	0		29440000
921	AAECRPVQNLLFSDCR	16	A0A3B6TQA1	Polysacc_synt_4 domain-containing protein OS=Triticum aestivum OX=4565 PE=4 SV=1	0W_3	3	645.977	-0.19835	NaN	0		22019000
922	AAECRPVQNLLFSDCR	16	A0A3B6TQA1	Polysacc_synt_4 domain-containing protein OS=Triticum aestivum OX=4565 PE=4 SV=1	2W_3	3	645.977	-0.15957	NaN	0		31263000
923	AAECRPVQNLLFSECR	16	A0A3B6CES2	Polysacc_synt_4 domain-containing protein OS=Triticum aestivum OX=4565 PE=4 SV=1	2W_1	3	650.649	0.15476	7.038e-07	1	104.26	16900000
924	AAECRPVQNLLFSECR	16	A0A3B6CES2	Polysacc_synt_4 domain-containing protein OS=Triticum aestivum OX=4565 PE=4 SV=1	0W_2	3	650.649	1.3559	1.7443e-09	1	110.35	10432000
925	AAECRPVQNLLFSECR	16	A0A3B6CES2	Polysacc_synt_4 domain-containing protein OS=Triticum aestivum OX=4565 PE=4 SV=1	2W_2	3	650.649	0.52971	1.272e-05	1	91.657	16088000
926	AAECRPVQNLLFSECR	16	A0A3B6CES2	Polysacc_synt_4 domain-containing protein OS=Triticum aestivum OX=4565 PE=4 SV=1	0W_3	3	650.649	-0.019461	1.4614e-07	1	108.63	7642900
927	AAECRPVQNLLFSECR	16	A0A3B6CES2	Polysacc_synt_4 domain-containing protein OS=Triticum aestivum OX=4565 PE=4 SV=1	2W_3	3	650.649	0.56481	3.8286e-10	1	118.19	14777000
928	AAECRPVQNLLFSECR	16	A0A3B6CES2	Polysacc_synt_4 domain-containing protein OS=Triticum aestivum OX=4565 PE=4 SV=1	0W_1	3	650.649	0.047286	NaN	0		6080600
929	AAEDFLGLLR	10	A0A3B6FHS1	Expressed protein(predicted) OS=Triticum aestivum OX=4565 PE=4 SV=1	0W_1	2	552.806	0.1575	7.8421e-05	1	107.79	31526000
930	AAEDFLGLLR	10	A0A3B6FHS1	Expressed protein(predicted) OS=Triticum aestivum OX=4565 PE=4 SV=1	2W_1	2	552.806	0.10443	0.0046613	1	67.334	55282000
931	AAEDFLGLLR	10	A0A3B6FHS1	Expressed protein(predicted) OS=Triticum aestivum OX=4565 PE=4 SV=1	0W_2	2	552.806	0.063217	0.00034849	1	96.342	30228000
932	AAEDFLGLLR	10	A0A3B6FHS1	Expressed protein(predicted) OS=Triticum aestivum OX=4565 PE=4 SV=1	2W_2	2	552.806	-0.083176	7.8421e-05	1	107.79	54313000
933	AAEDFLGLLR	10	A0A3B6FHS1	Expressed protein(predicted) OS=Triticum aestivum OX=4565 PE=4 SV=1	0W_3	2	552.806	0.33466	0.0042762	1	69.275	26444000
934	AAEDFLGLLR	10	A0A3B6FHS1	Expressed protein(predicted) OS=Triticum aestivum OX=4565 PE=4 SV=1	2W_3	2	552.806	0.093317	0.00095295	1	88.495	62011000
935	AAEEAAKPATLPSYPEMILAAIAALNDK	28	A0A3B6LTD4	H15 domain-containing protein OS=Triticum aestivum OX=4565 PE=3 SV=1	2W_1	3	971.176	-0.24245	1.4799e-24	1	106.28	88559000
936	AAEEAAKPATLPSYPEMILAAIAALNDK	28	A0A3B6LTD4	H15 domain-containing protein OS=Triticum aestivum OX=4565 PE=3 SV=1	2W_2	3	971.176	-0.84884	7.983e-14	1	87.091	96672000
937	AAEEAAKPATLPSYPEMILAAIAALNDK	28	A0A3B6LTD4	H15 domain-containing protein OS=Triticum aestivum OX=4565 PE=3 SV=1	2W_3	3	971.176	0.0010557	6.4597e-15	1	88.394	77497000
938	AAEEAAKPATLPSYPEMILAAIAALNDK	28	A0A3B6LTD4	H15 domain-containing protein OS=Triticum aestivum OX=4565 PE=3 SV=1	2W_1	3	962.504	0.091048	5.5224e-13	1	82.773	42340000
939	AAEEAAKPATLPSYPEMILAAIAALNDK	28	A0A3B6LTD4	H15 domain-containing protein OS=Triticum aestivum OX=4565 PE=3 SV=1	2W_2	3	962.504	-0.62195	8.0492e-08	1	57.347	41852000
940	AAEEAAKPATLPSYPEMILAAIAALNDK	28	A0A3B6LTD4	H15 domain-containing protein OS=Triticum aestivum OX=4565 PE=3 SV=1	2W_3	3	962.504	0.22853	2.6253e-10	1	75.695	35641000
941	AAEEAAKPATLPSYPEMILAAIAALNDK	28	A0A3B6LTD4	H15 domain-containing protein OS=Triticum aestivum OX=4565 PE=3 SV=1	0W_3	3	962.504	0.078536	NaN	0		501390
942	AAEFVVSK	8	A0A1D5W9E8	Oxidored_q6 domain-containing protein OS=Triticum aestivum OX=4565 PE=3 SV=1	2W_1	2	425.737	-1.5849	0.058108	1	54.982	40062000
943	AAEFVVSK	8	A0A1D5W9E8	Oxidored_q6 domain-containing protein OS=Triticum aestivum OX=4565 PE=3 SV=1	0W_2	2	425.737	-0.57413	0.050838	1	56.432	11490000
944	AAEFVVSK	8	A0A1D5W9E8	Oxidored_q6 domain-containing protein OS=Triticum aestivum OX=4565 PE=3 SV=1	2W_2	2	425.737	-1.8223	0.048068	1	57.59	34336000
945	AAEFVVSK	8	A0A1D5W9E8	Oxidored_q6 domain-containing protein OS=Triticum aestivum OX=4565 PE=3 SV=1	0W_3	2	425.737	-0.068312	0.058108	1	54.982	11916000
946	AAEFVVSK	8	A0A1D5W9E8	Oxidored_q6 domain-containing protein OS=Triticum aestivum OX=4565 PE=3 SV=1	2W_3	2	425.737	-2.2329	0.04472	1	59.368	42044000
947	AAEFVVSK	8	A0A1D5W9E8	Oxidored_q6 domain-containing protein OS=Triticum aestivum OX=4565 PE=3 SV=1	0W_1	2	425.737	-1.1499	NaN	0		18718000
948	AAEFVVSK	8	A0A1D5W9E8	Oxidored_q6 domain-containing protein OS=Triticum aestivum OX=4565 PE=3 SV=1	0W_2	2	425.737	-1.6206	NaN	0		18339000
949	AAEFVVSK	8	A0A1D5W9E8	Oxidored_q6 domain-containing protein OS=Triticum aestivum OX=4565 PE=3 SV=1	0W_3	2	425.737	-1.1739	NaN	0		18369000
950	AAEFVVSK	8	A0A1D5W9E8	Oxidored_q6 domain-containing protein OS=Triticum aestivum OX=4565 PE=3 SV=1	2W_3	2	425.737	-0.7822	NaN	0		13195000
951	AAEFWAR	7	A0A3B6RQG1	Alpha-glucosidase(predicted) OS=Triticum aestivum OX=4565 PE=3 SV=1	0W_1	2	425.714	0.26536	0.045379	1	88.029	88929000
952	AAEFWAR	7	A0A3B6RQG1	Alpha-glucosidase(predicted) OS=Triticum aestivum OX=4565 PE=3 SV=1	0W_2	2	425.714	-0.063027	0.02809	1	108.24	98552000
953	AAEFWAR	7	A0A3B6RQG1	Alpha-glucosidase(predicted) OS=Triticum aestivum OX=4565 PE=3 SV=1	2W_2	2	425.714	0.2893	0.027313	1	110.61	125890000
954	AAEFWAR	7	A0A3B6RQG1	Alpha-glucosidase(predicted) OS=Triticum aestivum OX=4565 PE=3 SV=1	0W_3	2	425.714	-0.086017	0.02809	1	108.24	140750000
955	AAEFWAR	7	A0A3B6RQG1	Alpha-glucosidase(predicted) OS=Triticum aestivum OX=4565 PE=3 SV=1	2W_3	2	425.714	0.11326	0.02809	1	108.24	144500000
956	AAEFWAR	7	A0A3B6RQG1	Alpha-glucosidase(predicted) OS=Triticum aestivum OX=4565 PE=3 SV=1	2W_1	2	425.714	0.071517	NaN	0		124010000
957	AAEFWAR	7	A0A3B6RQG1	Alpha-glucosidase(predicted) OS=Triticum aestivum OX=4565 PE=3 SV=1	0W_3	2	425.714	-0.32121	NaN	0		983600
958	AAEIASHSVQYGNNK	15	A0A3B5Y145	Protein BONZAI 3(predicted) OS=Triticum aestivum OX=4565 PE=4 SV=1	0W_1	3	530.262	-1.0579	0.0045234	1	35.118	4017900
959	AAEIASHSVQYGNNK	15	A0A3B5Y145	Protein BONZAI 3(predicted) OS=Triticum aestivum OX=4565 PE=4 SV=1	2W_1	3	530.262	-1.1303	NaN	0		6684600
960	AAEIASHSVQYGNNK	15	A0A3B5Y145	Protein BONZAI 3(predicted) OS=Triticum aestivum OX=4565 PE=4 SV=1	0W_2	3	530.262	-0.99085	NaN	0		3870400
961	AAEIASHSVQYGNNK	15	A0A3B5Y145	Protein BONZAI 3(predicted) OS=Triticum aestivum OX=4565 PE=4 SV=1	2W_2	3	530.262	-1.3641	NaN	0		6321500
962	AAEIASHSVQYGNNK	15	A0A3B5Y145	Protein BONZAI 3(predicted) OS=Triticum aestivum OX=4565 PE=4 SV=1	0W_3	3	530.262	-0.99313	NaN	0		4223300
963	AAEIASHSVQYGNNK	15	A0A3B5Y145	Protein BONZAI 3(predicted) OS=Triticum aestivum OX=4565 PE=4 SV=1	2W_3	3	530.262	-1.022	NaN	0		7932000
964	AAEIASHSVQYGNNR	15	A0A3B6PHL5	Protein BONZAI 3(predicted) OS=Triticum aestivum OX=4565 PE=4 SV=1	0W_1	3	539.597	0.58475	9.2722e-05	1	62.162	3859700
965	AAEIASHSVQYGNNR	15	A0A3B6PHL5	Protein BONZAI 3(predicted) OS=Triticum aestivum OX=4565 PE=4 SV=1	2W_1	3	539.597	-0.12619	0.00029345	1	53.869	5973200
966	AAEIASHSVQYGNNR	15	A0A3B6PHL5	Protein BONZAI 3(predicted) OS=Triticum aestivum OX=4565 PE=4 SV=1	0W_2	3	539.597	-0.091331	0.00014088	1	57.434	4132400
967	AAEIASHSVQYGNNR	15	A0A3B6PHL5	Protein BONZAI 3(predicted) OS=Triticum aestivum OX=4565 PE=4 SV=1	2W_2	3	539.597	-0.66247	0.00011123	1	60.345	4975500
968	AAEIASHSVQYGNNR	15	A0A3B6PHL5	Protein BONZAI 3(predicted) OS=Triticum aestivum OX=4565 PE=4 SV=1	0W_3	3	539.597	-0.28028	0.0060483	1	34.432	4672400
969	AAEIASHSVQYGNNR	15	A0A3B6PHL5	Protein BONZAI 3(predicted) OS=Triticum aestivum OX=4565 PE=4 SV=1	2W_3	3	539.597	-0.3251	2.7838e-05	1	71.879	4982100
970	AAEILFGLGFDK	12	A0A3B6TS84	ABCF1d OS=Triticum aestivum OX=4565 PE=4 SV=1	2W_1	2	640.848	0.3908	0.0090385	1	51.726	7688600
971	AAEILFGLGFDK	12	A0A3B6TS84	ABCF1d OS=Triticum aestivum OX=4565 PE=4 SV=1	0W_1	2	640.848	-0.91246	NaN	0		1453700
972	AAEILFGLGFDK	12	A0A3B6TS84	ABCF1d OS=Triticum aestivum OX=4565 PE=4 SV=1	2W_1	2	640.848	-3.5424	NaN	0		898000
973	AAEILFGLGFDK	12	A0A3B6TS84	ABCF1d OS=Triticum aestivum OX=4565 PE=4 SV=1	2W_1	2	640.848	1.5833	NaN	0		1448400
974	AAEILFGLGFDK	12	A0A3B6TS84	ABCF1d OS=Triticum aestivum OX=4565 PE=4 SV=1	2W_2	2	640.848	1.9793	NaN	0		6022700
975	AAEILFGLGFDK	12	A0A3B6TS84	ABCF1d OS=Triticum aestivum OX=4565 PE=4 SV=1	2W_3	2	640.848	1.0622	NaN	0		6450900
976	AAEILGHK	8	A0A3B6HV32	Fumarate hydratase 2, chloroplastic(predicted) OS=Triticum aestivum OX=4565 PE=3 SV=1	0W_1	2	419.743	-0.43319	0.03682	1	63.565	14142000
977	AAEILGHK	8	A0A3B6HV32	Fumarate hydratase 2, chloroplastic(predicted) OS=Triticum aestivum OX=4565 PE=3 SV=1	2W_1	2	419.743	-0.19624	0.027239	1	69.825	17270000
978	AAEILGHK	8	A0A3B6HV32	Fumarate hydratase 2, chloroplastic(predicted) OS=Triticum aestivum OX=4565 PE=3 SV=1	0W_2	2	419.743	-0.49154	0.035503	1	64.265	13979000
979	AAEILGHK	8	A0A3B6HV32	Fumarate hydratase 2, chloroplastic(predicted) OS=Triticum aestivum OX=4565 PE=3 SV=1	0W_3	2	419.743	-0.26338	0.027239	1	69.825	13770000
980	AAEILGHK	8	A0A3B6HV32	Fumarate hydratase 2, chloroplastic(predicted) OS=Triticum aestivum OX=4565 PE=3 SV=1	2W_3	2	419.743	-0.52979	0.025516	1	71.501	21215000
981	AAEILTNCSK	10	A0A3B6AR67	FACT complex subunit SPT16(predicted) OS=Triticum aestivum OX=4565 PE=4 SV=1	2W_1	2	553.779	0.27795	0.0074324	1	63.624	8674500
982	AAEILTNCSK	10	A0A3B6AR67	FACT complex subunit SPT16(predicted) OS=Triticum aestivum OX=4565 PE=4 SV=1	0W_2	2	553.779	-0.75893	0.0020921	1	81.017	9227500
983	AAEILTNCSK	10	A0A3B6AR67	FACT complex subunit SPT16(predicted) OS=Triticum aestivum OX=4565 PE=4 SV=1	2W_2	2	553.779	0.21643	0.00010726	1	103.26	8223900
984	AAEILTNCSK	10	A0A3B6AR67	FACT complex subunit SPT16(predicted) OS=Triticum aestivum OX=4565 PE=4 SV=1	0W_3	2	553.779	-0.44353	0.0016587	1	83.862	12138000
985	AAEILTNCSK	10	A0A3B6AR67	FACT complex subunit SPT16(predicted) OS=Triticum aestivum OX=4565 PE=4 SV=1	2W_3	2	553.779	0.047429	0.0020921	1	81.017	10092000
986	AAELAEVLSQAGLPLVSVSK	20	A0A3B6B880	RING-type domain-containing protein OS=Triticum aestivum OX=4565 PE=4 SV=1	2W_1	3	661.377	0.05548	0.0063486	1	25.496	3272700
987	AAELAEVLSQAGLPLVSVSK	20	A0A3B6B880	RING-type domain-containing protein OS=Triticum aestivum OX=4565 PE=4 SV=1	2W_2	3	661.377	-0.10417	0.04209	1	17.72	3905000
988	AAELAEVLSQAGLPLVSVSK	20	A0A3B6B880	RING-type domain-containing protein OS=Triticum aestivum OX=4565 PE=4 SV=1	0W_2	3	661.377	0.076251	NaN	0		1818700
989	AAELAEVLSQAGLPLVSVSK	20	A0A3B6B880	RING-type domain-containing protein OS=Triticum aestivum OX=4565 PE=4 SV=1	0W_3	3	661.377	0.27557	NaN	0		1295200
990	AAELAEVLSQAGLPLVSVSK	20	A0A3B6B880	RING-type domain-containing protein OS=Triticum aestivum OX=4565 PE=4 SV=1	2W_3	3	661.377	-0.12478	NaN	0		3472000
991	AAELAVSSLQALLR	14	A0A3B6LGL9	Phos_pyr_kin domain-containing protein OS=Triticum aestivum OX=4565 PE=4 SV=1	2W_1	2	721.422	-0.30848	0.042996	1	34.432	3773500
992	AAELAVSSLQALLR	14	A0A3B6LGL9	Phos_pyr_kin domain-containing protein OS=Triticum aestivum OX=4565 PE=4 SV=1	2W_2	2	721.422	-0.53481	0.00094383	1	61.409	2893800
993	AAELAVSSLQALLR	14	A0A3B6LGL9	Phos_pyr_kin domain-containing protein OS=Triticum aestivum OX=4565 PE=4 SV=1	2W_3	2	721.422	-0.58758	0.0046148	1	49.298	3430900
994	AAELAVSSLQALLR	14	A0A3B6LGL9	Phos_pyr_kin domain-containing protein OS=Triticum aestivum OX=4565 PE=4 SV=1	0W_1	2	721.422	-1.0773	NaN	0		515750
995	AAELAVSSLQALLR	14	A0A3B6LGL9	Phos_pyr_kin domain-containing protein OS=Triticum aestivum OX=4565 PE=4 SV=1	0W_2	2	721.422	-1.1617	NaN	0		242230
996	AAELAVSSLQALLR	14	A0A3B6LGL9	Phos_pyr_kin domain-containing protein OS=Triticum aestivum OX=4565 PE=4 SV=1	0W_3	2	721.422	-1.8914	NaN	0		222590
997	AAELFGVPR	9	A0A3B6C1P8	Pre-mRNA-splicing factor SYF1(predicted) OS=Triticum aestivum OX=4565 PE=4 SV=1	0W_1	2	480.269	0.052212	0.0070654	1	67.897	60103000
998	AAELFGVPR	9	A0A3B6C1P8	Pre-mRNA-splicing factor SYF1(predicted) OS=Triticum aestivum OX=4565 PE=4 SV=1	2W_1	2	480.269	-0.30069	0.0022422	1	89.355	66361000
999	AAELFGVPR	9	A0A3B6C1P8	Pre-mRNA-splicing factor SYF1(predicted) OS=Triticum aestivum OX=4565 PE=4 SV=1	0W_2	2	480.269	0.33299	0.0070654	1	67.897	57958000
1000	AAELFGVPR	9	A0A3B6C1P8	Pre-mRNA-splicing factor SYF1(predicted) OS=Triticum aestivum OX=4565 PE=4 SV=1	2W_2	2	480.269	-0.1778	0.0014297	1	99.442	63394000
1001	AAELFGVPR	9	A0A3B6C1P8	Pre-mRNA-splicing factor SYF1(predicted) OS=Triticum aestivum OX=4565 PE=4 SV=1	0W_3	2	480.269	-0.075249	0.0069608	1	68.224	54347000
1002	AAELFGVPR	9	A0A3B6C1P8	Pre-mRNA-splicing factor SYF1(predicted) OS=Triticum aestivum OX=4565 PE=4 SV=1	2W_3	2	480.269	-0.31107	0.0078908	1	66.692	80342000
1003	AAELFNPQLSQALEELNAR	19	A0A3B5ZRV9	Lipase_GDSL domain-containing protein OS=Triticum aestivum OX=4565 PE=4 SV=1	0W_1	3	705.367	0.33356	4.0956e-06	1	73.928	8548100
1004	AAELFNPQLSQALEELNAR	19	A0A3B5ZRV9	Lipase_GDSL domain-containing protein OS=Triticum aestivum OX=4565 PE=4 SV=1	2W_1	3	705.367	-0.11758	2.1845e-08	1	80.585	13386000
1005	AAELFNPQLSQALEELNAR	19	A0A3B5ZRV9	Lipase_GDSL domain-containing protein OS=Triticum aestivum OX=4565 PE=4 SV=1	2W_1	2	1057.55	1.2335	0.00030069	1	63.302	9491300
1006	AAELFNPQLSQALEELNAR	19	A0A3B5ZRV9	Lipase_GDSL domain-containing protein OS=Triticum aestivum OX=4565 PE=4 SV=1	0W_2	3	705.367	0.18563	4.1384e-05	1	64.705	9038300
1007	AAELFNPQLSQALEELNAR	19	A0A3B5ZRV9	Lipase_GDSL domain-containing protein OS=Triticum aestivum OX=4565 PE=4 SV=1	2W_2	2	1057.55	1.2098	0.0010104	1	49.188	8499100
1008	AAELFNPQLSQALEELNAR	19	A0A3B5ZRV9	Lipase_GDSL domain-containing protein OS=Triticum aestivum OX=4565 PE=4 SV=1	0W_3	3	705.367	0.093473	0.00064732	1	40.432	7316100
1009	AAELFNPQLSQALEELNAR	19	A0A3B5ZRV9	Lipase_GDSL domain-containing protein OS=Triticum aestivum OX=4565 PE=4 SV=1	2W_3	3	705.367	-0.32194	2.254e-08	1	80.316	16102000
1010	AAELFNPQLSQALEELNAR	19	A0A3B5ZRV9	Lipase_GDSL domain-containing protein OS=Triticum aestivum OX=4565 PE=4 SV=1	2W_3	2	1057.55	1.0551	2.9533e-05	1	72.359	8969400
1011	AAELFNPQLSQALEELNAR	19	A0A3B5ZRV9	Lipase_GDSL domain-containing protein OS=Triticum aestivum OX=4565 PE=4 SV=1	0W_1	2	1057.55	-0.61663	NaN	0		3852200
1012	AAELFNPQLSQALEELNAR	19	A0A3B5ZRV9	Lipase_GDSL domain-containing protein OS=Triticum aestivum OX=4565 PE=4 SV=1	0W_2	2	1057.55	1.9855	NaN	0		4471400
1013	AAELFNPQLSQALEELNAR	19	A0A3B5ZRV9	Lipase_GDSL domain-containing protein OS=Triticum aestivum OX=4565 PE=4 SV=1	2W_2	3	705.367	0.24253	NaN	0		14138000
1014	AAELFNPQLSQALEELNAR	19	A0A3B5ZRV9	Lipase_GDSL domain-containing protein OS=Triticum aestivum OX=4565 PE=4 SV=1	0W_3	2	1057.55	0.89104	NaN	0		3347500
1015	AAELHGNLTQAQR	13	A0A3B6MXV4	DEAD-box ATP-dependent RNA helicase 28(predicted) OS=Triticum aestivum OX=4565 PE=3 SV=1	0W_1	3	470.248	-0.21792	2.3463e-06	1	100.22	16151000
1016	AAELHGNLTQAQR	13	A0A3B6MXV4	DEAD-box ATP-dependent RNA helicase 28(predicted) OS=Triticum aestivum OX=4565 PE=3 SV=1	2W_1	3	470.248	-0.37886	5.2639e-07	1	107.65	24217000
1017	AAELHGNLTQAQR	13	A0A3B6MXV4	DEAD-box ATP-dependent RNA helicase 28(predicted) OS=Triticum aestivum OX=4565 PE=3 SV=1	0W_2	2	704.868	-0.28663	0.00076346	1	65.295	6372800
1018	AAELHGNLTQAQR	13	A0A3B6MXV4	DEAD-box ATP-dependent RNA helicase 28(predicted) OS=Triticum aestivum OX=4565 PE=3 SV=1	0W_2	3	470.248	-0.22176	2.3899e-05	1	86.803	21831000
1019	AAELHGNLTQAQR	13	A0A3B6MXV4	DEAD-box ATP-dependent RNA helicase 28(predicted) OS=Triticum aestivum OX=4565 PE=3 SV=1	2W_2	3	470.248	-0.422	4.9203e-09	1	112.02	23664000
1020	AAELHGNLTQAQR	13	A0A3B6MXV4	DEAD-box ATP-dependent RNA helicase 28(predicted) OS=Triticum aestivum OX=4565 PE=3 SV=1	0W_3	2	704.868	-0.19009	0.033321	1	39.006	2831200
1021	AAELHGNLTQAQR	13	A0A3B6MXV4	DEAD-box ATP-dependent RNA helicase 28(predicted) OS=Triticum aestivum OX=4565 PE=3 SV=1	0W_3	3	470.248	-0.18262	1.5872e-07	1	109.15	17696000
1022	AAELHGNLTQAQR	13	A0A3B6MXV4	DEAD-box ATP-dependent RNA helicase 28(predicted) OS=Triticum aestivum OX=4565 PE=3 SV=1	2W_3	3	470.248	-0.24348	3.7662e-09	1	113.99	27727000
1023	AAELHGNLTQAQR	13	A0A3B6MXV4	DEAD-box ATP-dependent RNA helicase 28(predicted) OS=Triticum aestivum OX=4565 PE=3 SV=1	2W_3	2	704.868		0.021461	1	38.3	0
1024	AAELHGNLTQAQR	13	A0A3B6MXV4	DEAD-box ATP-dependent RNA helicase 28(predicted) OS=Triticum aestivum OX=4565 PE=3 SV=1	0W_1	2	704.868	-0.47281	NaN	0		2337500
1025	AAELHGNLTQAQR	13	A0A3B6MXV4	DEAD-box ATP-dependent RNA helicase 28(predicted) OS=Triticum aestivum OX=4565 PE=3 SV=1	2W_1	2	704.868	-0.47859	NaN	0		6687700
1026	AAELHGNLTQAQR	13	A0A3B6MXV4	DEAD-box ATP-dependent RNA helicase 28(predicted) OS=Triticum aestivum OX=4565 PE=3 SV=1	2W_2	2	704.868	-0.15068	NaN	0		3447800
1027	AAELTNYDLFK	11	A0A3B5ZWV3	AAA domain-containing protein OS=Triticum aestivum OX=4565 PE=3 SV=1	0W_2	2	642.827	1.1429	0.017112	1	51.286	7374200
1028	AAELTNYDLFK	11	A0A3B5ZWV3	AAA domain-containing protein OS=Triticum aestivum OX=4565 PE=3 SV=1	0W_3	2	642.827	0.21089	0.017112	1	51.286	8532500
1029	AAELTNYDLFK	11	A0A3B5ZWV3	AAA domain-containing protein OS=Triticum aestivum OX=4565 PE=3 SV=1	2W_3	2	642.827	0.80299	NaN	0		11241000
1030	AAELTTLLESR	11	Q332R4	ATP synthase subunit alpha OS=Triticum aestivum OX=4565 GN=atp1-1 PE=3 SV=1	0W_1	2	602.333	0.31783	0.0022067	1	71.085	159270000
1031	AAELTTLLESR	11	Q332R4	ATP synthase subunit alpha OS=Triticum aestivum OX=4565 GN=atp1-1 PE=3 SV=1	2W_1	2	602.333	0.15833	0.00017331	1	95.477	427020000
1032	AAELTTLLESR	11	Q332R4	ATP synthase subunit alpha OS=Triticum aestivum OX=4565 GN=atp1-1 PE=3 SV=1	0W_2	2	602.333	0.32773	0.0010072	1	83.182	195320000
1033	AAELTTLLESR	11	Q332R4	ATP synthase subunit alpha OS=Triticum aestivum OX=4565 GN=atp1-1 PE=3 SV=1	2W_2	2	602.333	-0.13024	7.6883e-08	1	131.42	459430000
1034	AAELTTLLESR	11	Q332R4	ATP synthase subunit alpha OS=Triticum aestivum OX=4565 GN=atp1-1 PE=3 SV=1	0W_3	2	602.333	0.013814	0.0014687	1	78.548	219700000
1035	AAELTTLLESR	11	Q332R4	ATP synthase subunit alpha OS=Triticum aestivum OX=4565 GN=atp1-1 PE=3 SV=1	2W_3	2	602.333	0.0078748	8.143e-08	1	123.67	447240000
1036	AAELVHIACR	10	A0A3B6THF0	Proteasome activator subunit 4-like(predicted) OS=Triticum aestivum OX=4565 PE=4 SV=1	2W_1	2	570.303	0.14362	0.02373	1	52.579	1502200
1037	AAELVHIACR	10	A0A3B6THF0	Proteasome activator subunit 4-like(predicted) OS=Triticum aestivum OX=4565 PE=4 SV=1	2W_2	2	570.303	-0.17522	0.016981	1	55.064	1127000
1038	AAELVHIACR	10	A0A3B6THF0	Proteasome activator subunit 4-like(predicted) OS=Triticum aestivum OX=4565 PE=4 SV=1	2W_3	3	380.538	-0.11665	0.054407	1	28.958	1298800
1039	AAELVHIACR	10	A0A3B6THF0	Proteasome activator subunit 4-like(predicted) OS=Triticum aestivum OX=4565 PE=4 SV=1	0W_1	2	570.303	-1.4661	NaN	0		881470
1040	AAELVHIACR	10	A0A3B6THF0	Proteasome activator subunit 4-like(predicted) OS=Triticum aestivum OX=4565 PE=4 SV=1	0W_1	3	380.538	-0.62125	NaN	0		691550
1041	AAELVHIACR	10	A0A3B6THF0	Proteasome activator subunit 4-like(predicted) OS=Triticum aestivum OX=4565 PE=4 SV=1	2W_1	3	380.538	0.13779	NaN	0		1525500
1042	AAELVHIACR	10	A0A3B6THF0	Proteasome activator subunit 4-like(predicted) OS=Triticum aestivum OX=4565 PE=4 SV=1	2W_2	3	380.538	0.14796	NaN	0		1025700
1043	AAELVHIACR	10	A0A3B6THF0	Proteasome activator subunit 4-like(predicted) OS=Triticum aestivum OX=4565 PE=4 SV=1	0W_3	2	570.303	0.055459	NaN	0		849810
1044	AAELVHIACR	10	A0A3B6THF0	Proteasome activator subunit 4-like(predicted) OS=Triticum aestivum OX=4565 PE=4 SV=1	0W_3	3	380.538	0.2078	NaN	0		1449200
1045	AAEPTVPWVANR	12	A0A3B6AX75	Serine/threonine-protein kinase OS=Triticum aestivum OX=4565 PE=4 SV=1	2W_2	2	655.846	1.7747	0.057347	1	37.995	4221700
1046	AAEPTVPWVANR	12	A0A3B6AX75	Serine/threonine-protein kinase OS=Triticum aestivum OX=4565 PE=4 SV=1	0W_1	2	655.846	3.1818	NaN	0		2425600
1047	AAEPTVPWVANR	12	A0A3B6AX75	Serine/threonine-protein kinase OS=Triticum aestivum OX=4565 PE=4 SV=1	2W_1	2	655.846	2.1077	NaN	0		2282800
1048	AAEPTVPWVANR	12	A0A3B6AX75	Serine/threonine-protein kinase OS=Triticum aestivum OX=4565 PE=4 SV=1	0W_2	2	655.846	5.4568	NaN	0		1874000
1049	AAEPTVPWVANR	12	A0A3B6AX75	Serine/threonine-protein kinase OS=Triticum aestivum OX=4565 PE=4 SV=1	0W_3	2	655.846	0.91228	NaN	0		1601900
1050	AAEPTVPWVANR	12	A0A3B6AX75	Serine/threonine-protein kinase OS=Triticum aestivum OX=4565 PE=4 SV=1	2W_3	2	655.846	2.5412	NaN	0		2903900
1051	AAEQVAKPATLPPYPEMILAAIAALNDK	28	A0A3B6KMS8	H15 domain-containing protein OS=Triticum aestivum OX=4565 PE=3 SV=1	2W_1	3	974.86	-0.51378	8.4435e-08	1	56.854	10056000
1052	AAEQVAKPATLPPYPEMILAAIAALNDK	28	A0A3B6KMS8	H15 domain-containing protein OS=Triticum aestivum OX=4565 PE=3 SV=1	2W_3	3	974.86	-0.40318	NaN	0		7058400
1053	AAEQVAKPATLPPYPEMILAAIAALNDK	28	A0A3B6KMS8	H15 domain-containing protein OS=Triticum aestivum OX=4565 PE=3 SV=1	2W_1	3	988.863	0.12703	5.3932e-10	1	75.103	12229000
1054	AAEQVAKPATLPPYPEMILAAIAALNDK	28	A0A3B6KMS8	H15 domain-containing protein OS=Triticum aestivum OX=4565 PE=3 SV=1	2W_3	3	988.863	-0.29607	6.9304e-08	1	62.052	10128000
1055	AAEQVAKPATLPPYPEMILAAIAALNDK	28	A0A3B6KMS8	H15 domain-containing protein OS=Triticum aestivum OX=4565 PE=3 SV=1	2W_2	3	988.863	-0.41286	NaN	0		8600900
1056	AAESIADGDIVNVQIR	16	A0A3B6RMW2	Replication factor C subunit 1 OS=Triticum aestivum OX=4565 PE=3 SV=1	0W_1	2	835.939	0.19912	3.6246e-05	1	86.497	5157900
1057	AAESIADGDIVNVQIR	16	A0A3B6RMW2	Replication factor C subunit 1 OS=Triticum aestivum OX=4565 PE=3 SV=1	2W_1	2	835.939	-0.18117	1.1218e-13	1	120.92	64649000
1058	AAESIADGDIVNVQIR	16	A0A3B6RMW2	Replication factor C subunit 1 OS=Triticum aestivum OX=4565 PE=3 SV=1	2W_1	3	557.628		2.8739e-18	1	98.943	0
1059	AAESIADGDIVNVQIR	16	A0A3B6RMW2	Replication factor C subunit 1 OS=Triticum aestivum OX=4565 PE=3 SV=1	0W_2	2	835.939	-0.0031395	0.00018302	1	58.885	4156200
1060	AAESIADGDIVNVQIR	16	A0A3B6RMW2	Replication factor C subunit 1 OS=Triticum aestivum OX=4565 PE=3 SV=1	2W_2	2	835.939	-0.1232	4.7335e-20	1	132.08	69995000
1061	AAESIADGDIVNVQIR	16	A0A3B6RMW2	Replication factor C subunit 1 OS=Triticum aestivum OX=4565 PE=3 SV=1	0W_3	2	835.939	-0.58886	0.00018302	1	58.885	3496600
1062	AAESIADGDIVNVQIR	16	A0A3B6RMW2	Replication factor C subunit 1 OS=Triticum aestivum OX=4565 PE=3 SV=1	2W_3	2	835.939	-0.071911	4.0406e-20	1	133.48	98210000
1063	AAETLATMR	9	A0A3B6RLQ5	Embryo yellow protein (Fragment)(predicted) OS=Triticum aestivum OX=4565 PE=4 SV=1	0W_2	2	482.25	-1.7542	0.009517	1	65.224	5090000
1064	AAETLATMR	9	A0A3B6RLQ5	Embryo yellow protein (Fragment)(predicted) OS=Triticum aestivum OX=4565 PE=4 SV=1	2W_2	2	482.25	0.87731	0.001384	1	102.62	7896600
1065	AAETLATMR	9	A0A3B6RLQ5	Embryo yellow protein (Fragment)(predicted) OS=Triticum aestivum OX=4565 PE=4 SV=1	0W_3	2	482.25	-0.82645	0.0059266	1	71.451	6049800
1066	AAETLATMR	9	A0A3B6RLQ5	Embryo yellow protein (Fragment)(predicted) OS=Triticum aestivum OX=4565 PE=4 SV=1	2W_3	2	482.25	0.027896	0.0038346	1	78.098	7954900
1067	AAETLATMR	9	A0A3B6RLQ5	Embryo yellow protein (Fragment)(predicted) OS=Triticum aestivum OX=4565 PE=4 SV=1	0W_1	2	482.25	-0.92501	NaN	0		6009400
1068	AAETLATMR	9	A0A3B6RLQ5	Embryo yellow protein (Fragment)(predicted) OS=Triticum aestivum OX=4565 PE=4 SV=1	2W_1	2	482.25	0.3609	NaN	0		7571000
1069	AAEVAGQVNSWVEK	14	A0A3B6IPZ0	SERPIN domain-containing protein OS=Triticum aestivum OX=4565 PE=3 SV=1	0W_1	2	744.378	2.6369	0.00094383	1	61.409	5380900
1070	AAEVAGQVNSWVEK	14	A0A3B6IPZ0	SERPIN domain-containing protein OS=Triticum aestivum OX=4565 PE=3 SV=1	2W_1	2	744.378	2.8622	0.00033772	1	67.326	17494000
1071	AAEVAGQVNSWVEK	14	A0A3B6IPZ0	SERPIN domain-containing protein OS=Triticum aestivum OX=4565 PE=3 SV=1	2W_2	2	744.378	2.9129	0.00013816	1	91.812	16527000
1072	AAEVAGQVNSWVEK	14	A0A3B6IPZ0	SERPIN domain-containing protein OS=Triticum aestivum OX=4565 PE=3 SV=1	2W_3	2	744.378	2.5599	1.3906e-05	1	101.3	19825000
1073	AAEVAGQVNSWVEK	14	A0A3B6IPZ0	SERPIN domain-containing protein OS=Triticum aestivum OX=4565 PE=3 SV=1	0W_3	2	744.378	3.0099	NaN	0		8063300
1074	AAEVSEFFATR	11	A0A3B6JDI3	Aminopeptidase OS=Triticum aestivum OX=4565 PE=3 SV=1	0W_1	2	614.304	-0.84213	1.1021e-05	1	101.39	13488000
1075	AAEVSEFFATR	11	A0A3B6JDI3	Aminopeptidase OS=Triticum aestivum OX=4565 PE=3 SV=1	0W_2	2	614.304	-1.682	0.0011623	1	81.625	11528000
1076	AAEVSEFFATR	11	A0A3B6JDI3	Aminopeptidase OS=Triticum aestivum OX=4565 PE=3 SV=1	2W_2	2	614.304	-2.0962	0.00035458	1	91.313	26555000
1077	AAEVSEFFATR	11	A0A3B6JDI3	Aminopeptidase OS=Triticum aestivum OX=4565 PE=3 SV=1	0W_3	2	614.304	-1.6317	0.0035169	1	65.179	14192000
1078	AAEVSEFFATR	11	A0A3B6JDI3	Aminopeptidase OS=Triticum aestivum OX=4565 PE=3 SV=1	2W_1	2	614.304	-1.0762	NaN	0		27667000
1079	AAEVSEFFATR	11	A0A3B6JDI3	Aminopeptidase OS=Triticum aestivum OX=4565 PE=3 SV=1	2W_3	2	614.304	-1.1557	NaN	0		25972000
1080	AAEVTTQVNSWVEK	14	Q41593	Serpin-Z1A OS=Triticum aestivum OX=4565 GN=WZCI PE=1 SV=1	2W_1	2	781.396	0.97121	9.0302e-05	1	94.717	22468000
1081	AAEVTTQVNSWVEK	14	Q41593	Serpin-Z1A OS=Triticum aestivum OX=4565 GN=WZCI PE=1 SV=1	2W_2	2	781.396	1.3661	1.3906e-05	1	101.3	21539000
1082	AAEVTTQVNSWVEK	14	Q41593	Serpin-Z1A OS=Triticum aestivum OX=4565 GN=WZCI PE=1 SV=1	2W_3	2	781.396	1.2612	2.5508e-08	1	111.12	21382000
1083	AAEVTTQVNSWVEK	14	Q41593	Serpin-Z1A OS=Triticum aestivum OX=4565 GN=WZCI PE=1 SV=1	0W_1	2	781.396	1.8077	NaN	0		4747700
1084	AAEVTTQVNSWVEK	14	Q41593	Serpin-Z1A OS=Triticum aestivum OX=4565 GN=WZCI PE=1 SV=1	0W_2	2	781.396	1.8431	NaN	0		5773200
1085	AAEVTTQVNSWVEK	14	Q41593	Serpin-Z1A OS=Triticum aestivum OX=4565 GN=WZCI PE=1 SV=1	0W_3	2	781.396	1.236	NaN	0		6049100
1086	AAEVVSTVVQNNPK	14	A0A3B6N1I5	TOG domain-containing protein OS=Triticum aestivum OX=4565 PE=4 SV=1	0W_1	2	728.394	2.2479	0.0002778	1	70.089	2453600
1087	AAEVVSTVVQNNPK	14	A0A3B6N1I5	TOG domain-containing protein OS=Triticum aestivum OX=4565 PE=4 SV=1	0W_2	2	728.394	2.627	0.0039215	1	50.897	2850500
1088	AAEVVSTVVQNNPK	14	A0A3B6N1I5	TOG domain-containing protein OS=Triticum aestivum OX=4565 PE=4 SV=1	2W_2	2	728.394	-0.16554	0.00056775	1	65.043	2732600
1089	AAEVVSTVVQNNPK	14	A0A3B6N1I5	TOG domain-containing protein OS=Triticum aestivum OX=4565 PE=4 SV=1	0W_3	2	728.394	2.0119	0.015226	1	41.996	3174400
1090	AAEVVSTVVQNNPK	14	A0A3B6N1I5	TOG domain-containing protein OS=Triticum aestivum OX=4565 PE=4 SV=1	2W_3	2	728.394	0.66447	0.0039215	1	50.897	3614800
1091	AAEYMEMPVR	10	A0A3B6DCV6	J domain-containing protein OS=Triticum aestivum OX=4565 PE=4 SV=1	2W_1	2	598.776	-1.8582	0.00095295	1	88.495	13278000
1092	AAEYMEMPVR	10	A0A3B6DCV6	J domain-containing protein OS=Triticum aestivum OX=4565 PE=4 SV=1	0W_2	2	598.776	-1.466	0.00021725	1	98.048	16016000
1093	AAEYMEMPVR	10	A0A3B6DCV6	J domain-containing protein OS=Triticum aestivum OX=4565 PE=4 SV=1	2W_2	2	598.776	-2.1311	0.00021725	1	98.048	10092000
1094	AAEYMEMPVR	10	A0A3B6DCV6	J domain-containing protein OS=Triticum aestivum OX=4565 PE=4 SV=1	0W_3	2	598.776	-2.0835	0.0011414	1	87.258	14227000
1095	AAEYMEMPVR	10	A0A3B6DCV6	J domain-containing protein OS=Triticum aestivum OX=4565 PE=4 SV=1	2W_3	2	598.776	-2.0817	0.0026129	1	77.662	13522000
1096	AAEYMEMPVR	10	A0A3B6DCV6	J domain-containing protein OS=Triticum aestivum OX=4565 PE=4 SV=1	0W_1	2	598.776	-1.1494	NaN	0		13986000
1097	AAEYMEMPVRR	11	A0A3B6DCV6	J domain-containing protein OS=Triticum aestivum OX=4565 PE=4 SV=1	0W_3	3	451.553	-0.47879	0.057592	1	35.652	3005300
1098	AAEYMEMPVRR	11	A0A3B6DCV6	J domain-containing protein OS=Triticum aestivum OX=4565 PE=4 SV=1	0W_1	3	451.553	0.097844	NaN	0		2178200
1099	AAEYMEMPVRR	11	A0A3B6DCV6	J domain-containing protein OS=Triticum aestivum OX=4565 PE=4 SV=1	2W_1	3	451.553	-0.64425	NaN	0		3268000
1100	AAEYMEMPVRR	11	A0A3B6DCV6	J domain-containing protein OS=Triticum aestivum OX=4565 PE=4 SV=1	0W_2	3	451.553	0.25137	NaN	0		2934100
1101	AAEYMEMPVRR	11	A0A3B6DCV6	J domain-containing protein OS=Triticum aestivum OX=4565 PE=4 SV=1	2W_2	3	451.553	0.050735	NaN	0		3230300
1102	AAEYMEMPVRR	11	A0A3B6DCV6	J domain-containing protein OS=Triticum aestivum OX=4565 PE=4 SV=1	2W_3	3	451.553	-0.19323	NaN	0		5086500
1103	AAFDVQYGLFK	11	A0A3B5YUR3	HECT domain-containing protein OS=Triticum aestivum OX=4565 PE=4 SV=1	2W_1	2	629.827	-1.2837	0.0020965	1	72.2	19567000
1104	AAFDVQYGLFK	11	A0A3B5YUR3	HECT domain-containing protein OS=Triticum aestivum OX=4565 PE=4 SV=1	2W_2	2	629.827	-0.69294	0.0010834	1	82.417	18466000
1105	AAFDVQYGLFK	11	A0A3B5YUR3	HECT domain-containing protein OS=Triticum aestivum OX=4565 PE=4 SV=1	2W_3	2	629.827	-1.2861	0.0010834	1	82.417	21180000
1106	AAFDVQYGLFK	11	A0A3B5YUR3	HECT domain-containing protein OS=Triticum aestivum OX=4565 PE=4 SV=1	0W_1	2	629.827	-0.45921	NaN	0		3796800
1107	AAFDVQYGLFK	11	A0A3B5YUR3	HECT domain-containing protein OS=Triticum aestivum OX=4565 PE=4 SV=1	0W_2	2	629.827	0.5406	NaN	0		4557900
1108	AAFDVQYGLFK	11	A0A3B5YUR3	HECT domain-containing protein OS=Triticum aestivum OX=4565 PE=4 SV=1	0W_3	2	629.827	0.7692	NaN	0		3535800
1109	AAFENIR	7	A0A3B6B6J6	H0112G12.10 protein(predicted) OS=Triticum aestivum OX=4565 PE=4 SV=1	0W_3	2	410.719	-0.071261	0.055141	1	81.297	231030000
1110	AAFENIR	7	A0A3B6B6J6	H0112G12.10 protein(predicted) OS=Triticum aestivum OX=4565 PE=4 SV=1	2W_3	2	410.719	0.028352	0.027313	1	110.61	192590000
1111	AAFENIR	7	A0A3B6B6J6	H0112G12.10 protein(predicted) OS=Triticum aestivum OX=4565 PE=4 SV=1	0W_1	2	410.719	-0.18846	NaN	0		223150000
1112	AAFENIR	7	A0A3B6B6J6	H0112G12.10 protein(predicted) OS=Triticum aestivum OX=4565 PE=4 SV=1	2W_1	2	410.719	0.10042	NaN	0		186950000
1113	AAFENIR	7	A0A3B6B6J6	H0112G12.10 protein(predicted) OS=Triticum aestivum OX=4565 PE=4 SV=1	0W_2	2	410.719	-0.13461	NaN	0		171490000
1114	AAFENIR	7	A0A3B6B6J6	H0112G12.10 protein(predicted) OS=Triticum aestivum OX=4565 PE=4 SV=1	2W_2	2	410.719	0.15912	NaN	0		201870000
1115	AAFLASLGVDR	11	A0A3B6LN46	PKS_ER domain-containing protein OS=Triticum aestivum OX=4565 PE=4 SV=1	0W_1	2	560.311	0.64088	0.0013227	1	80.014	15863000
1116	AAFLASLGVDR	11	A0A3B6LN46	PKS_ER domain-containing protein OS=Triticum aestivum OX=4565 PE=4 SV=1	2W_1	2	560.311	0.084896	0.0013227	1	80.014	53539000
1117	AAFLASLGVDR	11	A0A3B6LN46	PKS_ER domain-containing protein OS=Triticum aestivum OX=4565 PE=4 SV=1	0W_2	2	560.311	0.36441	0.00035458	1	91.313	17972000
1118	AAFLASLGVDR	11	A0A3B6LN46	PKS_ER domain-containing protein OS=Triticum aestivum OX=4565 PE=4 SV=1	2W_2	2	560.311	-0.51242	0.0018236	1	74.962	64815000
1119	AAFLASLGVDR	11	A0A3B6LN46	PKS_ER domain-containing protein OS=Triticum aestivum OX=4565 PE=4 SV=1	0W_3	2	560.311	-0.098776	0.00035458	1	91.313	19914000
1120	AAFLASLGVDR	11	A0A3B6LN46	PKS_ER domain-containing protein OS=Triticum aestivum OX=4565 PE=4 SV=1	2W_3	2	560.311	-0.13788	1.1021e-05	1	101.39	64212000
1121	AAFLASLGVDR	11	A0A3B6LN46	PKS_ER domain-containing protein OS=Triticum aestivum OX=4565 PE=4 SV=1	0W_3	2	560.311	-0.76405	NaN	0		2268700
1122	AAFLPDGSEVILSGR	15	A0A3B6MZF2	WD_REPEATS_REGION domain-containing protein OS=Triticum aestivum OX=4565 PE=4 SV=1	0W_1	2	766.409	0.15707	9.3801e-05	1	75.316	122490000
1123	AAFLPDGSEVILSGR	15	A0A3B6MZF2	WD_REPEATS_REGION domain-containing protein OS=Triticum aestivum OX=4565 PE=4 SV=1	0W_1	3	511.275	0.13643	0.00068938	1	46.318	4802500
1124	AAFLPDGSEVILSGR	15	A0A3B6MZF2	WD_REPEATS_REGION domain-containing protein OS=Triticum aestivum OX=4565 PE=4 SV=1	2W_1	2	766.409	-0.059578	0.00014873	1	89.624	268060000
1125	AAFLPDGSEVILSGR	15	A0A3B6MZF2	WD_REPEATS_REGION domain-containing protein OS=Triticum aestivum OX=4565 PE=4 SV=1	2W_1	3	511.275	-0.0054076	2.2637e-05	1	73.722	14025000
1126	AAFLPDGSEVILSGR	15	A0A3B6MZF2	WD_REPEATS_REGION domain-containing protein OS=Triticum aestivum OX=4565 PE=4 SV=1	2W_2	2	766.409	-0.15031	8.4429e-05	1	80.632	282840000
1127	AAFLPDGSEVILSGR	15	A0A3B6MZF2	WD_REPEATS_REGION domain-containing protein OS=Triticum aestivum OX=4565 PE=4 SV=1	2W_2	3	511.275	0.48517	0.00028938	1	53.946	7409300
1128	AAFLPDGSEVILSGR	15	A0A3B6MZF2	WD_REPEATS_REGION domain-containing protein OS=Triticum aestivum OX=4565 PE=4 SV=1	0W_3	3	511.275	-0.073618	0.018932	1	28.64	2542300
1129	AAFLPDGSEVILSGR	15	A0A3B6MZF2	WD_REPEATS_REGION domain-containing protein OS=Triticum aestivum OX=4565 PE=4 SV=1	2W_3	2	766.409	0.073472	1.5544e-06	1	108.58	270150000
1130	AAFLPDGSEVILSGR	15	A0A3B6MZF2	WD_REPEATS_REGION domain-containing protein OS=Triticum aestivum OX=4565 PE=4 SV=1	0W_2	2	766.409	-0.059336	NaN	0		116650000
1131	AAFLPDGSEVILSGR	15	A0A3B6MZF2	WD_REPEATS_REGION domain-containing protein OS=Triticum aestivum OX=4565 PE=4 SV=1	0W_2	3	511.275	-0.74036	NaN	0		3125000
1132	AAFLPDGSEVILSGR	15	A0A3B6MZF2	WD_REPEATS_REGION domain-containing protein OS=Triticum aestivum OX=4565 PE=4 SV=1	0W_3	2	766.409	-0.21385	NaN	0		136430000
1133	AAFLPDGSEVILSGR	15	A0A3B6MZF2	WD_REPEATS_REGION domain-containing protein OS=Triticum aestivum OX=4565 PE=4 SV=1	2W_3	3	511.275	0.091788	NaN	0		6138300
1134	AAFMEGIEIADDKGWFVTPDISR	23	A0A3B6PTT6	OSIGBa0147O06.4 protein(predicted) OS=Triticum aestivum OX=4565 PE=4 SV=1	2W_1	3	856.753	0.67662	5.7277e-21	1	108.96	52921000
1135	AAFMEGIEIADDKGWFVTPDISR	23	A0A3B6PTT6	OSIGBa0147O06.4 protein(predicted) OS=Triticum aestivum OX=4565 PE=4 SV=1	2W_2	3	856.753	1.3847	8.2494e-26	1	113.42	77368000
1136	AAFMEGIEIADDKGWFVTPDISR	23	A0A3B6PTT6	OSIGBa0147O06.4 protein(predicted) OS=Triticum aestivum OX=4565 PE=4 SV=1	2W_3	3	856.753	1.0303	3.0165e-20	1	105.51	37120000
1137	AAFMEGIEIADDKGWFVTPDISR	23	A0A3B6PTT6	OSIGBa0147O06.4 protein(predicted) OS=Triticum aestivum OX=4565 PE=4 SV=1	2W_3	3	856.753	1.1548	NaN	0		1028400
1138	AAFVFFNSR	9	A0A3B6DD06	Putative membrane protein(predicted) OS=Triticum aestivum OX=4565 PE=4 SV=1	0W_1	2	529.775	1.225	0.010085	1	64.711	4230000
1139	AAFVFFNSR	9	A0A3B6DD06	Putative membrane protein(predicted) OS=Triticum aestivum OX=4565 PE=4 SV=1	0W_2	2	529.775	0.84291	0.005556	1	72.607	4912000
1140	AAFVFFNSR	9	A0A3B6DD06	Putative membrane protein(predicted) OS=Triticum aestivum OX=4565 PE=4 SV=1	2W_1	2	529.775	0.67633	NaN	0		8641300
1141	AAFVFFNSR	9	A0A3B6DD06	Putative membrane protein(predicted) OS=Triticum aestivum OX=4565 PE=4 SV=1	2W_2	2	529.775	0.24319	NaN	0		10926000
1142	AAFVFFNSR	9	A0A3B6DD06	Putative membrane protein(predicted) OS=Triticum aestivum OX=4565 PE=4 SV=1	0W_3	2	529.775	1.1128	NaN	0		5145300
1143	AAFVFFNSR	9	A0A3B6DD06	Putative membrane protein(predicted) OS=Triticum aestivum OX=4565 PE=4 SV=1	2W_3	2	529.775	0.51633	NaN	0		10780000
1144	AAFVPSSDSAFDTSYFTSR	19	A0A3B6HW70	Putative serine/threonine protein kinase IREH1(predicted) OS=Triticum aestivum OX=4565 PE=4 SV=1	0W_1	2	1028.47	-0.0022561	0.029559	1	29.603	4079600
1145	AAFVPSSDSAFDTSYFTSR	19	A0A3B6HW70	Putative serine/threonine protein kinase IREH1(predicted) OS=Triticum aestivum OX=4565 PE=4 SV=1	2W_1	2	1028.47	0.31695	3.4767e-05	1	71.376	10407000
1146	AAFVPSSDSAFDTSYFTSR	19	A0A3B6HW70	Putative serine/threonine protein kinase IREH1(predicted) OS=Triticum aestivum OX=4565 PE=4 SV=1	2W_2	2	1028.47	0.38216	0.00058554	1	58.693	10274000
1147	AAFVPSSDSAFDTSYFTSR	19	A0A3B6HW70	Putative serine/threonine protein kinase IREH1(predicted) OS=Triticum aestivum OX=4565 PE=4 SV=1	2W_3	2	1028.47	0.69981	2.9533e-05	1	72.359	12046000
1148	AAFVPSSDSAFDTSYFTSR	19	A0A3B6HW70	Putative serine/threonine protein kinase IREH1(predicted) OS=Triticum aestivum OX=4565 PE=4 SV=1	0W_2	2	1028.47	-0.33161	NaN	0		3738100
1149	AAFVPSSDSAFDTSYFTSR	19	A0A3B6HW70	Putative serine/threonine protein kinase IREH1(predicted) OS=Triticum aestivum OX=4565 PE=4 SV=1	0W_3	2	1028.47	0.52315	NaN	0		2543300
1150	AAFVSMPPSSQQYIK	15	A0A3B6CHL2	Importin N-terminal domain-containing protein OS=Triticum aestivum OX=4565 PE=4 SV=1	0W_2	2	835.416	0.56101	0.00086703	1	51.009	11652000
1151	AAFVSMPPSSQQYIK	15	A0A3B6CHL2	Importin N-terminal domain-containing protein OS=Triticum aestivum OX=4565 PE=4 SV=1	0W_1	2	835.416	0.81802	NaN	0		8147200
1152	AAFVSMPPSSQQYIK	15	A0A3B6CHL2	Importin N-terminal domain-containing protein OS=Triticum aestivum OX=4565 PE=4 SV=1	2W_2	2	835.416	0.044155	NaN	0		6621900
1153	AAFVSMPPSSQQYIK	15	A0A3B6CHL2	Importin N-terminal domain-containing protein OS=Triticum aestivum OX=4565 PE=4 SV=1	0W_3	2	835.416	1.0146	NaN	0		10598000
1154	AAFVSMPPSSQQYIK	15	A0A3B6CHL2	Importin N-terminal domain-containing protein OS=Triticum aestivum OX=4565 PE=4 SV=1	2W_3	2	835.416	-0.99341	NaN	0		3846300
1155	AAGAAPVAAEPGTCSFPMAR	20	A0A3B6HY69	CBFD_NFYB_HMF domain-containing protein OS=Triticum aestivum OX=4565 PE=4 SV=1	0W_1	2	966.459	0.39213	0.020923	1	29.603	6391400
1156	AAGAAPVAAEPGTCSFPMAR	20	A0A3B6HY69	CBFD_NFYB_HMF domain-containing protein OS=Triticum aestivum OX=4565 PE=4 SV=1	0W_2	2	966.459	-0.40605	0.0024329	1	42.716	7937200
1157	AAGAAPVAAEPGTCSFPMAR	20	A0A3B6HY69	CBFD_NFYB_HMF domain-containing protein OS=Triticum aestivum OX=4565 PE=4 SV=1	2W_2	2	966.459	-0.51008	0.0048931	1	35.133	4736700
1158	AAGAAPVAAEPGTCSFPMAR	20	A0A3B6HY69	CBFD_NFYB_HMF domain-containing protein OS=Triticum aestivum OX=4565 PE=4 SV=1	0W_3	2	966.459	-0.027954	0.003247	1	39.387	5218300
1159	AAGAAPVAAEPGTCSFPMAR	20	A0A3B6HY69	CBFD_NFYB_HMF domain-containing protein OS=Triticum aestivum OX=4565 PE=4 SV=1	2W_1	2	966.459	-0.2811	NaN	0		4440600
1160	AAGAGGLTVFCPEDK	15	Q06I99	Fasciclin-like protein FLA7 OS=Triticum aestivum OX=4565 PE=2 SV=1	0W_1	2	746.859	-1.0973	0.0042537	1	45.614	16198000
1161	AAGAGGLTVFCPEDK	15	Q06I99	Fasciclin-like protein FLA7 OS=Triticum aestivum OX=4565 PE=2 SV=1	2W_1	2	746.859	-0.61644	0.011631	1	40.983	26422000
1162	AAGAGGLTVFCPEDK	15	Q06I99	Fasciclin-like protein FLA7 OS=Triticum aestivum OX=4565 PE=2 SV=1	0W_2	2	746.859	-1.4498	0.00010149	2	74.789	22619000
1163	AAGAGGLTVFCPEDK	15	Q06I99	Fasciclin-like protein FLA7 OS=Triticum aestivum OX=4565 PE=2 SV=1	2W_2	2	746.859	-0.72747	0.0064239	1	44.252	26253000
1164	AAGAGGLTVFCPEDK	15	Q06I99	Fasciclin-like protein FLA7 OS=Triticum aestivum OX=4565 PE=2 SV=1	0W_3	2	746.859	-0.97397	0.00060868	1	59.709	19294000
1165	AAGAGGLTVFCPEDK	15	Q06I99	Fasciclin-like protein FLA7 OS=Triticum aestivum OX=4565 PE=2 SV=1	2W_3	2	746.859	-0.67846	0.00032795	1	65.038	30972000
1166	AAGAPLTLR	9	W5D6S5	S-formylglutathione hydrolase OS=Triticum aestivum OX=4565 GN=TRAES_3BF047500040CFD_c1 PE=3 SV=1	2W_1	2	435.264	0.22477	0.020308	1	56.258	15692000
1167	AAGAPLTLR	9	W5D6S5	S-formylglutathione hydrolase OS=Triticum aestivum OX=4565 GN=TRAES_3BF047500040CFD_c1 PE=3 SV=1	0W_2	2	435.264	0.10874	0.0041408	1	78.149	14209000
1168	AAGAPLTLR	9	W5D6S5	S-formylglutathione hydrolase OS=Triticum aestivum OX=4565 GN=TRAES_3BF047500040CFD_c1 PE=3 SV=1	2W_2	2	435.264	0.24112	0.024454	1	55.064	14787000
1169	AAGAPLTLR	9	W5D6S5	S-formylglutathione hydrolase OS=Triticum aestivum OX=4565 GN=TRAES_3BF047500040CFD_c1 PE=3 SV=1	0W_1	2	435.264	-0.30056	NaN	0		12004000
1170	AAGAPLTLR	9	W5D6S5	S-formylglutathione hydrolase OS=Triticum aestivum OX=4565 GN=TRAES_3BF047500040CFD_c1 PE=3 SV=1	0W_3	2	435.264	-0.63623	NaN	0		11905000
1171	AAGAPLTLR	9	W5D6S5	S-formylglutathione hydrolase OS=Triticum aestivum OX=4565 GN=TRAES_3BF047500040CFD_c1 PE=3 SV=1	2W_3	2	435.264	0.10497	NaN	0		17256000
1172	AAGASWIQFDEPTLVK	16	A0A3B6HXB3	5-methyltetrahydropteroyltriglutamate--homocysteine methyltransferase(predicted) OS=Triticum aestivum OX=4565 PE=3 SV=1	2W_1	2	866.949	0.2782	3.6375e-05	1	86.548	53287000
1173	AAGASWIQFDEPTLVK	16	A0A3B6HXB3	5-methyltetrahydropteroyltriglutamate--homocysteine methyltransferase(predicted) OS=Triticum aestivum OX=4565 PE=3 SV=1	0W_2	2	866.949	0.54916	3.1649e-05	1	72.898	17909000
1174	AAGASWIQFDEPTLVK	16	A0A3B6HXB3	5-methyltetrahydropteroyltriglutamate--homocysteine methyltransferase(predicted) OS=Triticum aestivum OX=4565 PE=3 SV=1	2W_3	2	866.949	0.30762	3.5874e-09	1	111.64	53407000
1175	AAGASWIQFDEPTLVK	16	A0A3B6HXB3	5-methyltetrahydropteroyltriglutamate--homocysteine methyltransferase(predicted) OS=Triticum aestivum OX=4565 PE=3 SV=1	0W_1	2	866.949	0.9524	NaN	0		17964000
1176	AAGASWIQFDEPTLVK	16	A0A3B6HXB3	5-methyltetrahydropteroyltriglutamate--homocysteine methyltransferase(predicted) OS=Triticum aestivum OX=4565 PE=3 SV=1	2W_2	2	866.949	0.025126	NaN	0		55175000
1177	AAGASWIQFDEPTLVK	16	A0A3B6HXB3	5-methyltetrahydropteroyltriglutamate--homocysteine methyltransferase(predicted) OS=Triticum aestivum OX=4565 PE=3 SV=1	0W_3	2	866.949	1.6164	NaN	0		13883000
1178	AAGATPVAAEPGTCSFPMAR	20	A0A3B6LY30	CBFD_NFYB_HMF domain-containing protein OS=Triticum aestivum OX=4565 PE=4 SV=1	0W_1	2	981.464	0.49483	0.0062953	1	34.649	11565000
1179	AAGATPVAAEPGTCSFPMAR	20	A0A3B6LY30	CBFD_NFYB_HMF domain-containing protein OS=Triticum aestivum OX=4565 PE=4 SV=1	2W_1	2	981.464	0.79497	0.0017896	1	45.347	7712000
1180	AAGATPVAAEPGTCSFPMAR	20	A0A3B6LY30	CBFD_NFYB_HMF domain-containing protein OS=Triticum aestivum OX=4565 PE=4 SV=1	0W_2	2	981.464	0.82213	0.00028298	1	65.423	11534000
1181	AAGATPVAAEPGTCSFPMAR	20	A0A3B6LY30	CBFD_NFYB_HMF domain-containing protein OS=Triticum aestivum OX=4565 PE=4 SV=1	0W_3	2	981.464	0.58146	0.0020609	1	44.238	10550000
1182	AAGATPVAAEPGTCSFPMAR	20	A0A3B6LY30	CBFD_NFYB_HMF domain-containing protein OS=Triticum aestivum OX=4565 PE=4 SV=1	2W_2	2	981.464	0.56668	NaN	0		7456800
1183	AAGATPVAAEPGTCSFPMAR	20	A0A3B6LY30	CBFD_NFYB_HMF domain-containing protein OS=Triticum aestivum OX=4565 PE=4 SV=1	2W_3	2	981.464	0.35627	NaN	0		6898100
1184	AAGEVLALQK	10	A0A3B6MTB1	Glucose-6-phosphate isomerase OS=Triticum aestivum OX=4565 PE=3 SV=1	2W_1	2	500.295	0.53425	0.019691	1	54.066	9016900
1185	AAGEVLALQK	10	A0A3B6MTB1	Glucose-6-phosphate isomerase OS=Triticum aestivum OX=4565 PE=3 SV=1	0W_2	2	500.295	1.3349	0.019691	1	54.066	4447600
1186	AAGEVLALQK	10	A0A3B6MTB1	Glucose-6-phosphate isomerase OS=Triticum aestivum OX=4565 PE=3 SV=1	0W_1	2	500.295	1.2887	NaN	0		4098000
1187	AAGFQALIQYTDAPTASAAR	20	A0A3B6IQ94	RRM domain-containing protein OS=Triticum aestivum OX=4565 PE=4 SV=1	2W_1	2	1012.02	0.0065775	9.6681e-08	1	83.423	16742000
1188	AAGFQALIQYTDAPTASAAR	20	A0A3B6IQ94	RRM domain-containing protein OS=Triticum aestivum OX=4565 PE=4 SV=1	2W_2	2	1012.02	-0.0037947	1.8423e-19	1	126.84	19514000
1189	AAGFQALIQYTDAPTASAAR	20	A0A3B6IQ94	RRM domain-containing protein OS=Triticum aestivum OX=4565 PE=4 SV=1	2W_3	2	1012.02	-0.19733	4.5377e-26	1	136.26	20397000
1190	AAGGAGMVLANTAASGEELVADSHLLPAVAVGK	33	A0A3B6THA1	Subtilisin-like protease SBT1.8(predicted) OS=Triticum aestivum OX=4565 PE=3 SV=1	2W_1	3	1016.53	0.12369	7.0045e-05	1	29.955	19884000
1191	AAGGAGMVLANTAASGEELVADSHLLPAVAVGK	33	A0A3B6THA1	Subtilisin-like protease SBT1.8(predicted) OS=Triticum aestivum OX=4565 PE=3 SV=1	2W_2	3	1016.53	0.052372	1.7261e-08	1	43.903	23815000
1192	AAGGAGMVLANTAASGEELVADSHLLPAVAVGK	33	A0A3B6THA1	Subtilisin-like protease SBT1.8(predicted) OS=Triticum aestivum OX=4565 PE=3 SV=1	2W_3	3	1016.53	0.34091	3.4718e-20	1	73.936	32029000
1193	AAGGAGMVLANTAASGEELVADSHLLPAVAVGK	33	A0A3B6THA1	Subtilisin-like protease SBT1.8(predicted) OS=Triticum aestivum OX=4565 PE=3 SV=1	0W_1	3	1016.53	-0.84223	NaN	0		8193000
1194	AAGGGAAVTGYGR	13	A0A3B6MKQ6	Galectin domain-containing protein OS=Triticum aestivum OX=4565 PE=4 SV=1	0W_2	2	554.281	-3.6657	0.035229	1	38.445	1878400
1195	AAGGGAAVTGYGR	13	A0A3B6MKQ6	Galectin domain-containing protein OS=Triticum aestivum OX=4565 PE=4 SV=1	2W_2	2	554.281	-2.6113	0.008794	1	47.062	1392000
1196	AAGGGAAVTGYGR	13	A0A3B6MKQ6	Galectin domain-containing protein OS=Triticum aestivum OX=4565 PE=4 SV=1	0W_3	2	554.281	-3.8238	0.030853	1	39.73	1863600
1197	AAGGGAAVTGYGR	13	A0A3B6MKQ6	Galectin domain-containing protein OS=Triticum aestivum OX=4565 PE=4 SV=1	0W_1	2	554.281	-4.0852	NaN	0		1748500
1198	AAGIDYECPALIGSVQPSAK	20	B8K1U9	Putative RNA-binding protein OS=Triticum aestivum OX=4565 GN=RBP PE=2 SV=1	0W_1	2	1024.01	0.03314	0.0014438	1	50.87	60028000
1199	AAGIDYECPALIGSVQPSAK	20	B8K1U9	Putative RNA-binding protein OS=Triticum aestivum OX=4565 GN=RBP PE=2 SV=1	2W_1	2	1024.01	-0.026241	7.3717e-08	1	84.66	76951000
1200	AAGIDYECPALIGSVQPSAK	20	B8K1U9	Putative RNA-binding protein OS=Triticum aestivum OX=4565 GN=RBP PE=2 SV=1	0W_2	2	1024.01	0.10777	0.0023235	1	43.164	54570000
1201	AAGIDYECPALIGSVQPSAK	20	B8K1U9	Putative RNA-binding protein OS=Triticum aestivum OX=4565 GN=RBP PE=2 SV=1	2W_2	2	1024.01	-0.072975	2.1484e-09	1	89.011	73880000
1202	AAGIDYECPALIGSVQPSAK	20	B8K1U9	Putative RNA-binding protein OS=Triticum aestivum OX=4565 GN=RBP PE=2 SV=1	0W_3	2	1024.01	0.062994	2.2246e-05	1	75.215	53322000
1203	AAGIDYECPALIGSVQPSAK	20	B8K1U9	Putative RNA-binding protein OS=Triticum aestivum OX=4565 GN=RBP PE=2 SV=1	2W_3	2	1024.01	-0.099787	4.6579e-11	1	102.98	76273000
1204	AAGIEGGFFK	10	A0A3B6QF91	Phenylalanine ammonia-lyase OS=Triticum aestivum OX=4565 PE=3 SV=1	2W_1	2	498.761	-0.81776	0.0093036	1	61.161	30908000
1205	AAGIEGGFFK	10	A0A3B6QF91	Phenylalanine ammonia-lyase OS=Triticum aestivum OX=4565 PE=3 SV=1	2W_2	2	498.761	-1.3969	0.02373	1	52.579	28093000
1206	AAGIEGGFFK	10	A0A3B6QF91	Phenylalanine ammonia-lyase OS=Triticum aestivum OX=4565 PE=3 SV=1	2W_3	2	498.761	-0.98525	0.010256	1	59.908	30705000
1207	AAGIEGGFFK	10	A0A3B6QF91	Phenylalanine ammonia-lyase OS=Triticum aestivum OX=4565 PE=3 SV=1	0W_1	2	498.761	-2.952	NaN	0		21946000
1208	AAGIEGGFFK	10	A0A3B6QF91	Phenylalanine ammonia-lyase OS=Triticum aestivum OX=4565 PE=3 SV=1	0W_2	2	498.761	-5.3683	NaN	0		18160000
1209	AAGIEGGFFK	10	A0A3B6QF91	Phenylalanine ammonia-lyase OS=Triticum aestivum OX=4565 PE=3 SV=1	0W_3	2	498.761	-5.096	NaN	0		23163000
1210	AAGLQFASK	9	A0A3B6I1X3	Pyr_redox_2 domain-containing protein OS=Triticum aestivum OX=4565 PE=4 SV=1	2W_3	2	446.748	0.055423	0.052003	1	50.034	10568000
1211	AAGLQFASK	9	A0A3B6I1X3	Pyr_redox_2 domain-containing protein OS=Triticum aestivum OX=4565 PE=4 SV=1	0W_1	2	446.748	0.0382	NaN	0		7947600
1212	AAGLQFASK	9	A0A3B6I1X3	Pyr_redox_2 domain-containing protein OS=Triticum aestivum OX=4565 PE=4 SV=1	0W_2	2	446.748	0.35333	NaN	0		9407100
1213	AAGLQFASK	9	A0A3B6I1X3	Pyr_redox_2 domain-containing protein OS=Triticum aestivum OX=4565 PE=4 SV=1	2W_2	2	446.748	0.76522	NaN	0		9786300
1214	AAGLQFASK	9	A0A3B6I1X3	Pyr_redox_2 domain-containing protein OS=Triticum aestivum OX=4565 PE=4 SV=1	0W_3	2	446.748	0.85258	NaN	0		8435500
1215	AAGLQVFGQPASTDVAR	17	A0A3B6KT48	Glutathione S-transferase 6, chloroplastic(predicted) OS=Triticum aestivum OX=4565 PE=3 SV=1	2W_1	2	865.447	0.96043	0.00049172	1	47.548	5183000
1216	AAGLQVFGQPASTDVAR	17	A0A3B6KT48	Glutathione S-transferase 6, chloroplastic(predicted) OS=Triticum aestivum OX=4565 PE=3 SV=1	2W_2	2	865.447	1.5464	0.0021159	1	41.695	5195200
1217	AAGLQVFGQPASTDVAR	17	A0A3B6KT48	Glutathione S-transferase 6, chloroplastic(predicted) OS=Triticum aestivum OX=4565 PE=3 SV=1	0W_1	2	865.447	0.37397	NaN	0		3134300
1218	AAGLQVFGQPASTDVAR	17	A0A3B6KT48	Glutathione S-transferase 6, chloroplastic(predicted) OS=Triticum aestivum OX=4565 PE=3 SV=1	2W_3	2	865.447	0.77659	NaN	0		5818900
1219	AAGLTVVQQAK	11	A0A3B6RJM8	Alpha-L-arabinofuranosidase B(predicted) OS=Triticum aestivum OX=4565 PE=4 SV=1	2W_1	2	543.319	-2.6477	0.0096825	1	55.353	18471000
1220	AAGLTVVQQAK	11	A0A3B6RJM8	Alpha-L-arabinofuranosidase B(predicted) OS=Triticum aestivum OX=4565 PE=4 SV=1	2W_2	2	543.319	-1.4557	0.0064799	1	58.592	19923000
1221	AAGLTVVQQAK	11	A0A3B6RJM8	Alpha-L-arabinofuranosidase B(predicted) OS=Triticum aestivum OX=4565 PE=4 SV=1	0W_3	2	543.319	-1.1329	0.011793	1	54.198	13319000
1222	AAGLTVVQQAK	11	A0A3B6RJM8	Alpha-L-arabinofuranosidase B(predicted) OS=Triticum aestivum OX=4565 PE=4 SV=1	2W_3	2	543.319		0.0074931	1	56.548	0
1223	AAGLTVVQQAK	11	A0A3B6RJM8	Alpha-L-arabinofuranosidase B(predicted) OS=Triticum aestivum OX=4565 PE=4 SV=1	0W_1	2	543.319	-4.6467	NaN	0		15346000
1224	AAGLTVVQQAK	11	A0A3B6RJM8	Alpha-L-arabinofuranosidase B(predicted) OS=Triticum aestivum OX=4565 PE=4 SV=1	0W_3	2	543.319	-1.3916	NaN	0		2199900
1225	AAGPHSALVG	10	A0A3B6JFM9	Hydrolase_4 domain-containing protein OS=Triticum aestivum OX=4565 PE=4 SV=1	0W_1	2	440.238	0.50564	0.034008	1	48.794	6727600
1226	AAGPHSALVG	10	A0A3B6JFM9	Hydrolase_4 domain-containing protein OS=Triticum aestivum OX=4565 PE=4 SV=1	2W_1	2	440.238	0.47641	NaN	0		6160000
1227	AAGPHSALVG	10	A0A3B6JFM9	Hydrolase_4 domain-containing protein OS=Triticum aestivum OX=4565 PE=4 SV=1	0W_2	2	440.238	0.51685	NaN	0		5807400
1228	AAGPHSALVG	10	A0A3B6JFM9	Hydrolase_4 domain-containing protein OS=Triticum aestivum OX=4565 PE=4 SV=1	2W_2	2	440.238	0.31911	NaN	0		6440200
1229	AAGPHSALVG	10	A0A3B6JFM9	Hydrolase_4 domain-containing protein OS=Triticum aestivum OX=4565 PE=4 SV=1	0W_3	2	440.238	0.90573	NaN	0		6226500
1230	AAGPHSALVG	10	A0A3B6JFM9	Hydrolase_4 domain-containing protein OS=Triticum aestivum OX=4565 PE=4 SV=1	2W_3	2	440.238	0.40851	NaN	0		6877500
1231	AAGQTALQQVGSVIK	15	A0A3B6ILK9	Putative translational activator(predicted) OS=Triticum aestivum OX=4565 PE=4 SV=1	2W_3	2	735.917		0.0056338	1	46.68	0
1232	AAGSHGLFEIR	11	A0A3B6EH20	Protein transport protein SEC23 OS=Triticum aestivum OX=4565 PE=3 SV=1	0W_1	3	386.54	-0.068764	0.0017423	1	55.721	28813000
1233	AAGSHGLFEIR	11	A0A3B6EH20	Protein transport protein SEC23 OS=Triticum aestivum OX=4565 PE=3 SV=1	2W_1	3	386.54	0.6706	0.0025033	1	53.567	26294000
1234	AAGSHGLFEIR	11	A0A3B6EH20	Protein transport protein SEC23 OS=Triticum aestivum OX=4565 PE=3 SV=1	0W_2	3	386.54	0.21672	0.0011085	1	60.255	22651000
1235	AAGSHGLFEIR	11	A0A3B6EH20	Protein transport protein SEC23 OS=Triticum aestivum OX=4565 PE=3 SV=1	2W_2	3	386.54	0.56896	0.0026991	1	53.013	23052000
1236	AAGSHGLFEIR	11	A0A3B6EH20	Protein transport protein SEC23 OS=Triticum aestivum OX=4565 PE=3 SV=1	0W_3	3	386.54	0.8065	0.0011446	1	59.84	25990000
1237	AAGSHGLFEIR	11	A0A3B6EH20	Protein transport protein SEC23 OS=Triticum aestivum OX=4565 PE=3 SV=1	2W_3	3	386.54	0.39098	0.00565	1	45.653	20060000
1238	AAGVTAHYYEDEAAPTGTCAVCVVGGER	28	A0A3B6NQW1	PfkB domain-containing protein OS=Triticum aestivum OX=4565 PE=4 SV=1	2W_1	3	971.104	0.22605	4.1982e-13	1	79.382	35963000
1239	AAGVTAHYYEDEAAPTGTCAVCVVGGER	28	A0A3B6NQW1	PfkB domain-containing protein OS=Triticum aestivum OX=4565 PE=4 SV=1	2W_2	3	971.104	-0.33369	3.2997e-09	1	66.545	35220000
1240	AAGVTAHYYEDEAAPTGTCAVCVVGGER	28	A0A3B6NQW1	PfkB domain-containing protein OS=Triticum aestivum OX=4565 PE=4 SV=1	2W_3	3	971.104	0.63893	3.7505e-13	1	80.355	33771000
1241	AAGVVVPESCLAGAR	15	A0A3B5ZZR8	Putative polygalacturonase(predicted) OS=Triticum aestivum OX=4565 PE=3 SV=1	2W_1	2	728.882	-2.7865	0.0010144	1	55.724	14218000
1242	AAGVVVPESCLAGAR	15	A0A3B5ZZR8	Putative polygalacturonase(predicted) OS=Triticum aestivum OX=4565 PE=3 SV=1	0W_2	2	728.882	-2.6872	0.031276	1	34.432	7855400
1243	AAGVVVPESCLAGAR	15	A0A3B5ZZR8	Putative polygalacturonase(predicted) OS=Triticum aestivum OX=4565 PE=3 SV=1	2W_2	2	728.882	-2.4455	0.0012384	1	54.898	15226000
1244	AAGVVVPESCLAGAR	15	A0A3B5ZZR8	Putative polygalacturonase(predicted) OS=Triticum aestivum OX=4565 PE=3 SV=1	0W_3	2	728.882	-3.7519	0.0018885	1	52.5	7383600
1245	AAGVVVPESCLAGAR	15	A0A3B5ZZR8	Putative polygalacturonase(predicted) OS=Triticum aestivum OX=4565 PE=3 SV=1	2W_3	2	728.882	-2.4697	0.00072849	1	57.434	13805000
1246	AAGVVVPESCLAGAR	15	A0A3B5ZZR8	Putative polygalacturonase(predicted) OS=Triticum aestivum OX=4565 PE=3 SV=1	0W_1	2	728.882	-3.062	NaN	0		7035400
1247	AAGYHEHAMFVAK	13	A0A3B6C8Y0	Vacuolar protein sorting-associated protein 11 homolog OS=Triticum aestivum OX=4565 PE=3 SV=1	0W_1	3	477.899	-0.56358	0.0069085	1	38.3	3714300
1248	AAGYHEHAMFVAK	13	A0A3B6C8Y0	Vacuolar protein sorting-associated protein 11 homolog OS=Triticum aestivum OX=4565 PE=3 SV=1	2W_1	3	477.899	-0.14608	0.0089811	1	35.317	5125200
1249	AAGYHEHAMFVAK	13	A0A3B6C8Y0	Vacuolar protein sorting-associated protein 11 homolog OS=Triticum aestivum OX=4565 PE=3 SV=1	0W_2	3	477.899	-0.80055	0.018329	1	32.263	3940800
1250	AAGYHEHAMFVAK	13	A0A3B6C8Y0	Vacuolar protein sorting-associated protein 11 homolog OS=Triticum aestivum OX=4565 PE=3 SV=1	2W_2	3	477.899	-0.28162	0.0012955	1	50.116	5067800
1251	AAGYHEHAMFVAK	13	A0A3B6C8Y0	Vacuolar protein sorting-associated protein 11 homolog OS=Triticum aestivum OX=4565 PE=3 SV=1	0W_3	3	477.899	-0.78745	6.5062e-05	1	71.153	4642500
1252	AAGYHEHAMFVAK	13	A0A3B6C8Y0	Vacuolar protein sorting-associated protein 11 homolog OS=Triticum aestivum OX=4565 PE=3 SV=1	2W_3	3	477.899	-0.5709	0.00057102	1	55.578	5049400
1253	AAGYVCDNTLK	11	A0A3B6E9I3	PMEI domain-containing protein OS=Triticum aestivum OX=4565 PE=4 SV=1	2W_1	2	606.29	-2.778	0.0089491	1	55.754	41407000
1254	AAGYVCDNTLK	11	A0A3B6E9I3	PMEI domain-containing protein OS=Triticum aestivum OX=4565 PE=4 SV=1	2W_3	2	606.29	-2.3487	0.0088641	1	55.801	22999000
1255	AAGYVCDNTLK	11	A0A3B6E9I3	PMEI domain-containing protein OS=Triticum aestivum OX=4565 PE=4 SV=1	0W_1	2	606.29	-3.4948	NaN	0		11012000
1256	AAGYVCDNTLK	11	A0A3B6E9I3	PMEI domain-containing protein OS=Triticum aestivum OX=4565 PE=4 SV=1	0W_2	2	606.29	-2.8947	NaN	0		20028000
1257	AAGYVCDNTLK	11	A0A3B6E9I3	PMEI domain-containing protein OS=Triticum aestivum OX=4565 PE=4 SV=1	2W_2	2	606.29	-2.5029	NaN	0		19843000
1258	AAGYVCDNTLK	11	A0A3B6E9I3	PMEI domain-containing protein OS=Triticum aestivum OX=4565 PE=4 SV=1	0W_3	2	606.29	-2.7686	NaN	0		10915000
1259	AAGYVCDNTLK	11	A0A3B6E9I3	PMEI domain-containing protein OS=Triticum aestivum OX=4565 PE=4 SV=1	2W_3	2	606.29	-0.31361	NaN	0		1409200
1260	AAGYVCDNTLKR	12	A0A3B6E9I3	PMEI domain-containing protein OS=Triticum aestivum OX=4565 PE=4 SV=1	0W_1	3	456.563	-0.24757	8.0392e-05	1	83.045	9303100
1261	AAGYVCDNTLKR	12	A0A3B6E9I3	PMEI domain-containing protein OS=Triticum aestivum OX=4565 PE=4 SV=1	2W_1	3	456.563	-0.35526	8.0392e-05	1	83.045	21937000
1262	AAGYVCDNTLKR	12	A0A3B6E9I3	PMEI domain-containing protein OS=Triticum aestivum OX=4565 PE=4 SV=1	0W_2	3	456.563	-0.71161	3.4153e-05	1	89.805	13189000
1263	AAGYVCDNTLKR	12	A0A3B6E9I3	PMEI domain-containing protein OS=Triticum aestivum OX=4565 PE=4 SV=1	2W_2	3	456.563	0.093359	0.00015531	1	72.531	22196000
1264	AAGYVCDNTLKR	12	A0A3B6E9I3	PMEI domain-containing protein OS=Triticum aestivum OX=4565 PE=4 SV=1	0W_3	3	456.563	-0.54099	2.3433e-05	1	92.866	11177000
1265	AAGYVCDNTLKR	12	A0A3B6E9I3	PMEI domain-containing protein OS=Triticum aestivum OX=4565 PE=4 SV=1	2W_3	3	456.563	-0.49916	8.1376e-07	1	103.91	26915000
1266	AAGYVCDNTLKR	12	A0A3B6E9I3	PMEI domain-containing protein OS=Triticum aestivum OX=4565 PE=4 SV=1	2W_3	2	684.34	0.01558	0.054708	1	50.484	9268500
1267	AAGYVCDNTLKR	12	A0A3B6E9I3	PMEI domain-containing protein OS=Triticum aestivum OX=4565 PE=4 SV=1	0W_1	2	684.34	0.52138	NaN	0		2506500
1268	AAGYVCDNTLKR	12	A0A3B6E9I3	PMEI domain-containing protein OS=Triticum aestivum OX=4565 PE=4 SV=1	2W_1	2	684.34	0.038992	NaN	0		6808600
1269	AAGYVCDNTLKR	12	A0A3B6E9I3	PMEI domain-containing protein OS=Triticum aestivum OX=4565 PE=4 SV=1	0W_2	2	684.34	0.097353	NaN	0		4448800
1270	AAGYVCDNTLKR	12	A0A3B6E9I3	PMEI domain-containing protein OS=Triticum aestivum OX=4565 PE=4 SV=1	2W_2	2	684.34	0.35517	NaN	0		7980000
1271	AAGYVCDNTLKR	12	A0A3B6E9I3	PMEI domain-containing protein OS=Triticum aestivum OX=4565 PE=4 SV=1	0W_3	2	684.34	0.048792	NaN	0		2880800
1272	AAHLVDSTNQVGHFQK	16	A0A3B6U0B3	Plasma membrane ATPase OS=Triticum aestivum OX=4565 PE=3 SV=1	0W_1	3	584.632	-0.89033	0.00027985	1	50.102	16218000
1273	AAHLVDSTNQVGHFQK	16	A0A3B6U0B3	Plasma membrane ATPase OS=Triticum aestivum OX=4565 PE=3 SV=1	2W_1	3	584.632	-0.51594	4.3261e-06	1	75.589	25526000
1274	AAHLVDSTNQVGHFQK	16	A0A3B6U0B3	Plasma membrane ATPase OS=Triticum aestivum OX=4565 PE=3 SV=1	0W_2	3	584.632	-0.49636	0.00039153	1	47.037	19901000
1275	AAHLVDSTNQVGHFQK	16	A0A3B6U0B3	Plasma membrane ATPase OS=Triticum aestivum OX=4565 PE=3 SV=1	2W_2	3	584.632	-0.52537	3.0544e-06	1	78.401	32165000
1276	AAHLVDSTNQVGHFQK	16	A0A3B6U0B3	Plasma membrane ATPase OS=Triticum aestivum OX=4565 PE=3 SV=1	0W_3	3	584.632	0.19207	0.00010507	1	54.898	27009000
1277	AAHLVDSTNQVGHFQK	16	A0A3B6U0B3	Plasma membrane ATPase OS=Triticum aestivum OX=4565 PE=3 SV=1	2W_3	3	584.632	0.67565	3.4289e-05	1	59.248	28633000
1278	AAHMLGQPEVLDFFAK	16	Q8W0Q1	Putative aldehyde dehydrogenase WIS1 OS=Triticum aestivum OX=4565 GN=wis1 PE=2 SV=1	0W_1	3	597.303	-0.20826	1.2823e-05	1	66.246	5046400
1279	AAHMLGQPEVLDFFAK	16	Q8W0Q1	Putative aldehyde dehydrogenase WIS1 OS=Triticum aestivum OX=4565 GN=wis1 PE=2 SV=1	0W_1	3	597.303	-0.14089	4.8131e-06	1	74.789	3656100
1280	AAHMLGQPEVLDFFAK	16	Q8W0Q1	Putative aldehyde dehydrogenase WIS1 OS=Triticum aestivum OX=4565 GN=wis1 PE=2 SV=1	2W_1	3	597.303	-0.67592	7.2266e-06	1	87.083	8819000
1281	AAHMLGQPEVLDFFAK	16	Q8W0Q1	Putative aldehyde dehydrogenase WIS1 OS=Triticum aestivum OX=4565 GN=wis1 PE=2 SV=1	0W_2	3	597.303	-0.65612	1.2823e-05	1	66.246	5394800
1282	AAHMLGQPEVLDFFAK	16	Q8W0Q1	Putative aldehyde dehydrogenase WIS1 OS=Triticum aestivum OX=4565 GN=wis1 PE=2 SV=1	0W_2	3	597.303	-0.011043	4.8131e-06	1	74.789	2930100
1283	AAHMLGQPEVLDFFAK	16	Q8W0Q1	Putative aldehyde dehydrogenase WIS1 OS=Triticum aestivum OX=4565 GN=wis1 PE=2 SV=1	2W_2	3	597.303	-0.87694	5.5715e-07	1	100.11	9345600
1284	AAHMLGQPEVLDFFAK	16	Q8W0Q1	Putative aldehyde dehydrogenase WIS1 OS=Triticum aestivum OX=4565 GN=wis1 PE=2 SV=1	0W_3	3	597.303	-0.51748	1.2823e-05	1	66.246	3194100
1285	AAHMLGQPEVLDFFAK	16	Q8W0Q1	Putative aldehyde dehydrogenase WIS1 OS=Triticum aestivum OX=4565 GN=wis1 PE=2 SV=1	2W_3	3	597.303	-0.95145	4.8131e-06	1	74.789	8402700
1286	AAHMLGQPEVLDFFAK	16	Q8W0Q1	Putative aldehyde dehydrogenase WIS1 OS=Triticum aestivum OX=4565 GN=wis1 PE=2 SV=1	0W_3	3	597.303	-0.24877	NaN	0		5395500
1287	AAHMLGQPEVLDFFAK	16	Q8W0Q1	Putative aldehyde dehydrogenase WIS1 OS=Triticum aestivum OX=4565 GN=wis1 PE=2 SV=1	2W_3	3	597.303	-1.1516	NaN	0		3782500
1288	AAHMSAGGK	9	A0A1D5Y7B6	Formate dehydrogenase, mitochondrial OS=Triticum aestivum OX=4565 PE=3 SV=1	0W_1	2	436.208	-0.0086306	0.0019958	1	74.173	12603000
1289	AAHMSAGGK	9	A0A1D5Y7B6	Formate dehydrogenase, mitochondrial OS=Triticum aestivum OX=4565 PE=3 SV=1	2W_1	2	436.208	-0.10825	0.00063772	1	96.948	20561000
1290	AAHMSAGGK	9	A0A1D5Y7B6	Formate dehydrogenase, mitochondrial OS=Triticum aestivum OX=4565 PE=3 SV=1	0W_2	2	436.208	0.13651	0.0019958	1	74.173	13671000
1291	AAHMSAGGK	9	A0A1D5Y7B6	Formate dehydrogenase, mitochondrial OS=Triticum aestivum OX=4565 PE=3 SV=1	2W_2	2	436.208	-0.020682	0.0011379	1	84.615	24823000
1292	AAHMSAGGK	9	A0A1D5Y7B6	Formate dehydrogenase, mitochondrial OS=Triticum aestivum OX=4565 PE=3 SV=1	0W_3	2	436.208	0.14038	0.0019013	1	74.92	16700000
1293	AAHMSAGGK	9	A0A1D5Y7B6	Formate dehydrogenase, mitochondrial OS=Triticum aestivum OX=4565 PE=3 SV=1	2W_3	2	436.208	-0.083797	0.0005386	1	104.01	24429000
1294	AAHMSAGGK	9	A0A1D5Y7B6	Formate dehydrogenase, mitochondrial OS=Triticum aestivum OX=4565 PE=3 SV=1	2W_2	2	444.206	-0.26987	0.013663	1	46.39	15565000
1295	AAHMSAGGK	9	A0A1D5Y7B6	Formate dehydrogenase, mitochondrial OS=Triticum aestivum OX=4565 PE=3 SV=1	0W_1	2	444.206	0.30442	NaN	0		3818100
1296	AAHMSAGGK	9	A0A1D5Y7B6	Formate dehydrogenase, mitochondrial OS=Triticum aestivum OX=4565 PE=3 SV=1	2W_1	2	444.206	-0.22119	NaN	0		12439000
1297	AAHMSAGGK	9	A0A1D5Y7B6	Formate dehydrogenase, mitochondrial OS=Triticum aestivum OX=4565 PE=3 SV=1	0W_2	2	444.206	-0.2081	NaN	0		4619900
1298	AAHMSAGGK	9	A0A1D5Y7B6	Formate dehydrogenase, mitochondrial OS=Triticum aestivum OX=4565 PE=3 SV=1	0W_3	2	444.206	-0.47661	NaN	0		4609800
1299	AAHMSAGGK	9	A0A1D5Y7B6	Formate dehydrogenase, mitochondrial OS=Triticum aestivum OX=4565 PE=3 SV=1	2W_3	2	444.206	-0.74671	NaN	0		15915000
1300	AAHSAWR	7	A0A3B6JRM0	FKS1_dom1 domain-containing protein OS=Triticum aestivum OX=4565 PE=4 SV=1	0W_1	2	399.704	-0.17468	0.03881	1	94.262	2946400
1301	AAHSAWR	7	A0A3B6JRM0	FKS1_dom1 domain-containing protein OS=Triticum aestivum OX=4565 PE=4 SV=1	0W_2	2	399.704	0.082844	0.047106	1	86.838	3040400
1302	AAHSAWR	7	A0A3B6JRM0	FKS1_dom1 domain-containing protein OS=Triticum aestivum OX=4565 PE=4 SV=1	2W_1	2	399.704	0.58255	NaN	0		3224000
1303	AAHSAWR	7	A0A3B6JRM0	FKS1_dom1 domain-containing protein OS=Triticum aestivum OX=4565 PE=4 SV=1	2W_2	2	399.704	0.47877	NaN	0		4283400
1304	AAHSAWR	7	A0A3B6JRM0	FKS1_dom1 domain-containing protein OS=Triticum aestivum OX=4565 PE=4 SV=1	0W_3	2	399.704	0.21247	NaN	0		4378700
1305	AAHSAWR	7	A0A3B6JRM0	FKS1_dom1 domain-containing protein OS=Triticum aestivum OX=4565 PE=4 SV=1	2W_3	2	399.704	0.5986	NaN	0		3754900
1306	AAHVDPLVVGR	11	A0A3B6SL72	OsMFT1(predicted) OS=Triticum aestivum OX=4565 PE=4 SV=1	0W_3	2	588.33	-0.84364	0.029994	1	40.496	14090000
1307	AAIAAIQNCEDLPR	14	A0A3B6I2H3	FKS1_dom1 domain-containing protein OS=Triticum aestivum OX=4565 PE=4 SV=1	0W_1	2	771.391	0.13887	0.00011625	1	78.814	52491000
1308	AAIAAIQNCEDLPR	14	A0A3B6I2H3	FKS1_dom1 domain-containing protein OS=Triticum aestivum OX=4565 PE=4 SV=1	2W_1	2	771.391	0.26583	4.1318e-05	1	97.69	95126000
1309	AAIAAIQNCEDLPR	14	A0A3B6I2H3	FKS1_dom1 domain-containing protein OS=Triticum aestivum OX=4565 PE=4 SV=1	0W_2	2	771.391	-0.1141	1.3879e-05	1	101.32	51695000
1310	AAIAAIQNCEDLPR	14	A0A3B6I2H3	FKS1_dom1 domain-containing protein OS=Triticum aestivum OX=4565 PE=4 SV=1	2W_2	2	771.391	-0.22157	4.1318e-05	1	97.69	85923000
1311	AAIAAIQNCEDLPR	14	A0A3B6I2H3	FKS1_dom1 domain-containing protein OS=Triticum aestivum OX=4565 PE=4 SV=1	0W_3	2	771.391	0.31996	9.4896e-13	1	120.84	56040000
1312	AAIAAIQNCEDLPR	14	A0A3B6I2H3	FKS1_dom1 domain-containing protein OS=Triticum aestivum OX=4565 PE=4 SV=1	2W_3	2	771.391	-0.041118	3.5077e-06	1	107.65	86822000
1313	AAIAEIEGYIR	11	A0A3B6KIH0	(Protein-PII) uridylyltransferase(predicted) OS=Triticum aestivum OX=4565 PE=4 SV=1	2W_1	2	603.33	0.57921	0.0017639	1	75.566	11223000
1314	AAIAEIEGYIR	11	A0A3B6KIH0	(Protein-PII) uridylyltransferase(predicted) OS=Triticum aestivum OX=4565 PE=4 SV=1	2W_2	2	603.33	0.51052	0.00022183	1	94.363	24852000
1315	AAIAEIEGYIR	11	A0A3B6KIH0	(Protein-PII) uridylyltransferase(predicted) OS=Triticum aestivum OX=4565 PE=4 SV=1	2W_3	2	603.33	0.33844	7.0567e-06	1	104.43	11958000
1316	AAIAEIEGYIR	11	A0A3B6KIH0	(Protein-PII) uridylyltransferase(predicted) OS=Triticum aestivum OX=4565 PE=4 SV=1	0W_1	2	603.33	1.043	NaN	0		1386300
1317	AAIAEIEGYIR	11	A0A3B6KIH0	(Protein-PII) uridylyltransferase(predicted) OS=Triticum aestivum OX=4565 PE=4 SV=1	0W_2	2	603.33	1.3882	NaN	0		1455000
1318	AAIAEIEGYIR	11	A0A3B6KIH0	(Protein-PII) uridylyltransferase(predicted) OS=Triticum aestivum OX=4565 PE=4 SV=1	0W_3	2	603.33	0.60763	NaN	0		1496500
1319	AAIAETFNHTDSEFLK	16	A0A3B6PK93	PPM-type phosphatase domain-containing protein OS=Triticum aestivum OX=4565 PE=3 SV=1	0W_1	3	598.628	0.20814	9.1973e-06	1	68.283	17138000
1320	AAIAETFNHTDSEFLK	16	A0A3B6PK93	PPM-type phosphatase domain-containing protein OS=Triticum aestivum OX=4565 PE=3 SV=1	2W_1	3	598.628	0.53685	0.0001082	1	54.812	40165000
1321	AAIAETFNHTDSEFLK	16	A0A3B6PK93	PPM-type phosphatase domain-containing protein OS=Triticum aestivum OX=4565 PE=3 SV=1	2W_2	3	598.628	0.65854	0.0003696	1	47.639	76772000
1322	AAIAETFNHTDSEFLK	16	A0A3B6PK93	PPM-type phosphatase domain-containing protein OS=Triticum aestivum OX=4565 PE=3 SV=1	0W_3	3	598.628	0.76409	5.1881e-06	1	74.296	17919000
1323	AAIAETFNHTDSEFLK	16	A0A3B6PK93	PPM-type phosphatase domain-containing protein OS=Triticum aestivum OX=4565 PE=3 SV=1	2W_3	3	598.628	0.36455	0.00085007	1	44.252	50399000
1324	AAIAETFNHTDSEFLK	16	A0A3B6PK93	PPM-type phosphatase domain-containing protein OS=Triticum aestivum OX=4565 PE=3 SV=1	0W_2	3	598.628	0.18543	NaN	0		16840000
1325	AAIAGFILGR	10	A0A3B5Z5Y9	H15 domain-containing protein OS=Triticum aestivum OX=4565 PE=4 SV=1	0W_1	2	494.801	0.65314	0.0077425	1	63.216	6782800
1326	AAIAGFILGR	10	A0A3B5Z5Y9	H15 domain-containing protein OS=Triticum aestivum OX=4565 PE=4 SV=1	2W_1	2	494.801	0.4229	0.0066503	1	64.654	11571000
1327	AAIAGFILGR	10	A0A3B5Z5Y9	H15 domain-containing protein OS=Triticum aestivum OX=4565 PE=4 SV=1	0W_2	2	494.801	0.69732	0.0066503	1	64.654	5451400
1328	AAIAGFILGR	10	A0A3B5Z5Y9	H15 domain-containing protein OS=Triticum aestivum OX=4565 PE=4 SV=1	2W_2	2	494.801	0.59507	0.0034913	1	73.233	12149000
1329	AAIAGFILGR	10	A0A3B5Z5Y9	H15 domain-containing protein OS=Triticum aestivum OX=4565 PE=4 SV=1	0W_3	2	494.801	0.47447	0.0083146	1	62.463	5063500
1330	AAIAGFILGR	10	A0A3B5Z5Y9	H15 domain-containing protein OS=Triticum aestivum OX=4565 PE=4 SV=1	2W_3	2	494.801	0.61005	0.0034913	1	73.233	12686000
1331	AAIAVQGCLK	10	A0A3B6PH49	DNA-directed RNA polymerase subunit OS=Triticum aestivum OX=4565 PE=3 SV=1	2W_1	2	515.789	-1.1922	0.00041312	1	95.502	23500000
1332	AAIAVQGCLK	10	A0A3B6PH49	DNA-directed RNA polymerase subunit OS=Triticum aestivum OX=4565 PE=3 SV=1	0W_2	2	515.789	-0.13541	0.0032647	1	74.376	21911000
1333	AAIAVQGCLK	10	A0A3B6PH49	DNA-directed RNA polymerase subunit OS=Triticum aestivum OX=4565 PE=3 SV=1	2W_2	2	515.789	-1.2425	0.0015441	1	84.615	33378000
1334	AAIAVQGCLK	10	A0A3B6PH49	DNA-directed RNA polymerase subunit OS=Triticum aestivum OX=4565 PE=3 SV=1	0W_3	2	515.789	-0.014613	0.0035518	1	72.928	24220000
1335	AAIAVQGCLK	10	A0A3B6PH49	DNA-directed RNA polymerase subunit OS=Triticum aestivum OX=4565 PE=3 SV=1	2W_3	2	515.789	-0.54469	0.0016456	1	83.948	27659000
1336	AAIAVQGCLK	10	A0A3B6PH49	DNA-directed RNA polymerase subunit OS=Triticum aestivum OX=4565 PE=3 SV=1	0W_1	2	515.789	-0.98145	NaN	0		27580000
1337	AAIAVQGCLK	10	A0A3B6PH49	DNA-directed RNA polymerase subunit OS=Triticum aestivum OX=4565 PE=3 SV=1	2W_3	2	515.789	-1.7945	NaN	0		2626700
1338	AAIAVQGCLK	10	A0A3B6PH49	DNA-directed RNA polymerase subunit OS=Triticum aestivum OX=4565 PE=3 SV=1	2W_3	2	515.789	-4.4289	NaN	0		849840
1339	AAICGIQDTQGGK	13	B2ZGJ6	Cytosolic acetyl-CoA carboxylase OS=Triticum aestivum OX=4565 GN=Acc-2 PE=4 SV=1	0W_1	2	659.825	-0.017792	0.0061637	1	50.897	8238500
1340	AAICGIQDTQGGK	13	B2ZGJ6	Cytosolic acetyl-CoA carboxylase OS=Triticum aestivum OX=4565 GN=Acc-2 PE=4 SV=1	2W_1	2	659.825	-0.046858	0.00010766	1	89.189	12161000
1341	AAICGIQDTQGGK	13	B2ZGJ6	Cytosolic acetyl-CoA carboxylase OS=Triticum aestivum OX=4565 GN=Acc-2 PE=4 SV=1	0W_2	2	659.825	0.35637	0.0014748	1	61.11	7656400
1342	AAICGIQDTQGGK	13	B2ZGJ6	Cytosolic acetyl-CoA carboxylase OS=Triticum aestivum OX=4565 GN=Acc-2 PE=4 SV=1	2W_2	2	659.825	0.0062651	0.00027025	1	73.881	12013000
1343	AAICGIQDTQGGK	13	B2ZGJ6	Cytosolic acetyl-CoA carboxylase OS=Triticum aestivum OX=4565 GN=Acc-2 PE=4 SV=1	0W_3	2	659.825	0.81412	0.001795	1	59.227	6806100
1344	AAICGIQDTQGGK	13	B2ZGJ6	Cytosolic acetyl-CoA carboxylase OS=Triticum aestivum OX=4565 GN=Acc-2 PE=4 SV=1	2W_3	2	659.825	0.16501	0.0027324	1	55.899	10154000
1345	AAIDVVCNPLGK	12	A0A3B6QDF5	ADP,ATP carrier protein OS=Triticum aestivum OX=4565 PE=3 SV=1	0W_1	2	628.837	-2.384	0.00073529	1	73.9	34654000
1346	AAIDVVCNPLGK	12	A0A3B6QDF5	ADP,ATP carrier protein OS=Triticum aestivum OX=4565 PE=3 SV=1	0W_2	2	628.837	-0.67577	0.0017057	1	64.224	28501000
1347	AAIDVVCNPLGK	12	A0A3B6QDF5	ADP,ATP carrier protein OS=Triticum aestivum OX=4565 PE=3 SV=1	0W_3	2	628.837	-0.55151	0.00071159	1	74.611	33691000
1348	AAIDVVCNPLGK	12	A0A3B6QDF5	ADP,ATP carrier protein OS=Triticum aestivum OX=4565 PE=3 SV=1	2W_1	2	628.837	-2.4689	NaN	0		23076000
1349	AAIDVVCNPLGK	12	A0A3B6QDF5	ADP,ATP carrier protein OS=Triticum aestivum OX=4565 PE=3 SV=1	2W_2	2	628.837	-2.4171	NaN	0		23244000
1350	AAIFEHGGEVWR	12	A0A3B6LVF7	Putative NRT1/PTR-like transporter(predicted) OS=Triticum aestivum OX=4565 PE=4 SV=1	2W_1	3	457.898	-0.22822	0.0012569	1	54.005	4712300
1351	AAIFEHGGEVWR	12	A0A3B6LVF7	Putative NRT1/PTR-like transporter(predicted) OS=Triticum aestivum OX=4565 PE=4 SV=1	2W_3	3	457.898	-0.066146	0.008575	1	40.475	5510800
1352	AAIFEHGGEVWR	12	A0A3B6LVF7	Putative NRT1/PTR-like transporter(predicted) OS=Triticum aestivum OX=4565 PE=4 SV=1	0W_1	3	457.898	-1.1007	NaN	0		3252300
1353	AAIFEHGGEVWR	12	A0A3B6LVF7	Putative NRT1/PTR-like transporter(predicted) OS=Triticum aestivum OX=4565 PE=4 SV=1	0W_2	3	457.898	-0.26385	NaN	0		4116500
1354	AAIFEHGGEVWR	12	A0A3B6LVF7	Putative NRT1/PTR-like transporter(predicted) OS=Triticum aestivum OX=4565 PE=4 SV=1	2W_2	3	457.898	0.73781	NaN	0		5225000
1355	AAIFEHGGEVWR	12	A0A3B6LVF7	Putative NRT1/PTR-like transporter(predicted) OS=Triticum aestivum OX=4565 PE=4 SV=1	0W_3	3	457.898	-0.23902	NaN	0		3350900
1356	AAIFGHAVNPLGK	13	W5ABI1	Mitochondrial 37S ribosomal protein S27(predicted) OS=Triticum aestivum OX=4565 PE=4 SV=1	0W_1	3	432.247	-0.90089	0.0012955	1	50.116	7824800
1357	AAIFGHAVNPLGK	13	W5ABI1	Mitochondrial 37S ribosomal protein S27(predicted) OS=Triticum aestivum OX=4565 PE=4 SV=1	2W_1	3	432.247	-0.95329	0.0016144	1	47.712	17579000
1358	AAIFGHAVNPLGK	13	W5ABI1	Mitochondrial 37S ribosomal protein S27(predicted) OS=Triticum aestivum OX=4565 PE=4 SV=1	0W_2	3	432.247	-0.65281	0.0017248	1	46.88	7998700
1359	AAIFGHAVNPLGK	13	W5ABI1	Mitochondrial 37S ribosomal protein S27(predicted) OS=Triticum aestivum OX=4565 PE=4 SV=1	2W_2	3	432.247	-0.52679	0.00061308	1	55.261	14145000
1360	AAIFGHAVNPLGK	13	W5ABI1	Mitochondrial 37S ribosomal protein S27(predicted) OS=Triticum aestivum OX=4565 PE=4 SV=1	0W_3	3	432.247	-0.67791	0.0059664	1	39.73	8890400
1361	AAIFGHAVNPLGK	13	W5ABI1	Mitochondrial 37S ribosomal protein S27(predicted) OS=Triticum aestivum OX=4565 PE=4 SV=1	2W_3	3	432.247	-0.8581	NaN	0		21798000
1362	AAIFSDTR	8	A0A3B6MRH3	AMP-binding domain-containing protein OS=Triticum aestivum OX=4565 PE=4 SV=1	0W_1	2	440.73	-0.62585	0.01561	1	84.498	9113200
1363	AAIFSDTR	8	A0A3B6MRH3	AMP-binding domain-containing protein OS=Triticum aestivum OX=4565 PE=4 SV=1	2W_1	2	440.73	-0.48562	0.011905	1	95.909	14484000
1364	AAIFSDTR	8	A0A3B6MRH3	AMP-binding domain-containing protein OS=Triticum aestivum OX=4565 PE=4 SV=1	0W_2	2	440.73	-0.69942	0.01425	1	87.181	7220800
1365	AAIFSDTR	8	A0A3B6MRH3	AMP-binding domain-containing protein OS=Triticum aestivum OX=4565 PE=4 SV=1	2W_2	2	440.73	-0.56439	0.018034	1	79.713	16685000
1366	AAIFSDTR	8	A0A3B6MRH3	AMP-binding domain-containing protein OS=Triticum aestivum OX=4565 PE=4 SV=1	0W_3	2	440.73	-0.66167	0.01561	1	84.498	9052300
1367	AAIFSDTR	8	A0A3B6MRH3	AMP-binding domain-containing protein OS=Triticum aestivum OX=4565 PE=4 SV=1	2W_3	2	440.73	-0.50656	0.011329	1	98.458	16081000
1368	AAIGAAEPVPALVELLGSGSPR	22	A0A3B6LHN3	RING-type E3 ubiquitin transferase OS=Triticum aestivum OX=4565 PE=4 SV=1	2W_2	3	692.388	-1.3341	0.00024898	1	42.348	4296000
1369	AAIGAAEPVPALVELLGSGSPR	22	A0A3B6LHN3	RING-type E3 ubiquitin transferase OS=Triticum aestivum OX=4565 PE=4 SV=1	0W_1	3	692.388	-0.39229	NaN	0		1236600
1370	AAIGAAEPVPALVELLGSGSPR	22	A0A3B6LHN3	RING-type E3 ubiquitin transferase OS=Triticum aestivum OX=4565 PE=4 SV=1	2W_1	3	692.388	-1.5322	NaN	0		4080200
1371	AAIGAAEPVPALVELLGSGSPR	22	A0A3B6LHN3	RING-type E3 ubiquitin transferase OS=Triticum aestivum OX=4565 PE=4 SV=1	0W_2	3	692.388	-0.65421	NaN	0		1402900
1372	AAIGAAEPVPALVELLGSGSPR	22	A0A3B6LHN3	RING-type E3 ubiquitin transferase OS=Triticum aestivum OX=4565 PE=4 SV=1	0W_3	3	692.388	-0.45665	NaN	0		1192200
1373	AAIGAAEPVPALVELLGSGSPR	22	A0A3B6LHN3	RING-type E3 ubiquitin transferase OS=Triticum aestivum OX=4565 PE=4 SV=1	2W_3	3	692.388	-0.91676	NaN	0		4234600
1374	AAIINSQTLDEVTR	14	W5FQA8	U2 small nuclear ribonucleoprotein A(predicted) OS=Triticum aestivum OX=4565 PE=4 SV=1	0W_1	2	765.91	0.69412	6.065e-13	1	124.51	50215000
1375	AAIINSQTLDEVTR	14	W5FQA8	U2 small nuclear ribonucleoprotein A(predicted) OS=Triticum aestivum OX=4565 PE=4 SV=1	2W_1	2	765.91	0.64689	8.1651e-06	1	104.81	58648000
1376	AAIINSQTLDEVTR	14	W5FQA8	U2 small nuclear ribonucleoprotein A(predicted) OS=Triticum aestivum OX=4565 PE=4 SV=1	0W_2	2	765.91	1.0508	1.4505e-08	1	115.12	48243000
1377	AAIINSQTLDEVTR	14	W5FQA8	U2 small nuclear ribonucleoprotein A(predicted) OS=Triticum aestivum OX=4565 PE=4 SV=1	2W_2	2	765.91	0.84286	2.9363e-06	1	107.99	52285000
1378	AAIINSQTLDEVTR	14	W5FQA8	U2 small nuclear ribonucleoprotein A(predicted) OS=Triticum aestivum OX=4565 PE=4 SV=1	0W_3	2	765.91	1.2984	3.0844e-13	1	127.71	46053000
1379	AAIINSQTLDEVTR	14	W5FQA8	U2 small nuclear ribonucleoprotein A(predicted) OS=Triticum aestivum OX=4565 PE=4 SV=1	2W_3	2	765.91	0.62178	0.00032214	1	68.044	65871000
1380	AAILDGDVAAFLPSK	15	A0A3B6QBS5	Transmembrane protein 120B(predicted) OS=Triticum aestivum OX=4565 PE=4 SV=1	2W_1	2	744.409	-0.35094	0.00080015	1	56.514	17052000
1381	AAILDGDVAAFLPSK	15	A0A3B6QBS5	Transmembrane protein 120B(predicted) OS=Triticum aestivum OX=4565 PE=4 SV=1	2W_2	2	744.409	-0.56383	0.00044265	1	62.861	33272000
1382	AAILDGDVAAFLPSK	15	A0A3B6QBS5	Transmembrane protein 120B(predicted) OS=Triticum aestivum OX=4565 PE=4 SV=1	2W_3	2	744.409	-0.11335	0.00080015	1	56.514	17044000
1383	AAILQTDAFLTNAR	14	A0A3B6QB20	Protein arginine N-methyltransferase OS=Triticum aestivum OX=4565 PE=3 SV=1	2W_1	2	752.91	0.38834	0.0028793	1	53.3	10013000
1384	AAILQTDAFLTNAR	14	A0A3B6QB20	Protein arginine N-methyltransferase OS=Triticum aestivum OX=4565 PE=3 SV=1	0W_2	2	752.91	0.27605	0.00094383	1	61.409	3032200
1385	AAILQTDAFLTNAR	14	A0A3B6QB20	Protein arginine N-methyltransferase OS=Triticum aestivum OX=4565 PE=3 SV=1	2W_2	2	752.91	-0.039618	0.0028793	1	53.3	9201100
1386	AAILQTDAFLTNAR	14	A0A3B6QB20	Protein arginine N-methyltransferase OS=Triticum aestivum OX=4565 PE=3 SV=1	0W_3	2	752.91	0.053686	0.020662	1	39.629	4106300
1387	AAINASVR	8	A0A3B6MUW2	Pyruvate dehydrogenase E1 component subunit beta OS=Triticum aestivum OX=4565 PE=4 SV=1	0W_1	2	401.233	-0.51189	0.011773	1	96.492	12856000
1388	AAINASVR	8	A0A3B6MUW2	Pyruvate dehydrogenase E1 component subunit beta OS=Triticum aestivum OX=4565 PE=4 SV=1	2W_1	2	401.233	-0.1829	0.018155	1	79.474	16237000
1389	AAINASVR	8	A0A3B6MUW2	Pyruvate dehydrogenase E1 component subunit beta OS=Triticum aestivum OX=4565 PE=4 SV=1	0W_2	2	401.233	-0.76916	0.011314	1	98.523	19041000
1390	AAINASVR	8	A0A3B6MUW2	Pyruvate dehydrogenase E1 component subunit beta OS=Triticum aestivum OX=4565 PE=4 SV=1	0W_3	2	401.233	-0.49402	0.017778	1	80.219	13290000
1391	AAINASVR	8	A0A3B6MUW2	Pyruvate dehydrogenase E1 component subunit beta OS=Triticum aestivum OX=4565 PE=4 SV=1	2W_3	2	401.233	-0.38974	0.0141	1	87.476	18168000
1392	AAINASVR	8	A0A3B6MUW2	Pyruvate dehydrogenase E1 component subunit beta OS=Triticum aestivum OX=4565 PE=4 SV=1	0W_2	2	401.233	1.1881	NaN	0		709790
1393	AAINASVR	8	A0A3B6MUW2	Pyruvate dehydrogenase E1 component subunit beta OS=Triticum aestivum OX=4565 PE=4 SV=1	2W_2	2	401.233	-0.2993	NaN	0		15810000
1394	AAINASVR	8	A0A3B6MUW2	Pyruvate dehydrogenase E1 component subunit beta OS=Triticum aestivum OX=4565 PE=4 SV=1	2W_3	2	401.233	1.1207	NaN	0		1080400
1395	AAIRPMMDALVR	12	A0A3B6B2L7	H0311C03.6 protein(predicted) OS=Triticum aestivum OX=4565 PE=4 SV=1	0W_2	3	448.581	1.8241	0.026634	1	36.938	10015000
1396	AAIRPMMDALVR	12	A0A3B6B2L7	H0311C03.6 protein(predicted) OS=Triticum aestivum OX=4565 PE=4 SV=1	0W_3	3	448.581	1.8805	0.012514	1	43.297	11776000
1397	AAISIAASK	9	Q95H50	50S ribosomal protein L16, chloroplastic OS=Triticum aestivum OX=4565 GN=rpl16 PE=3 SV=1	0W_3	2	416.25	1.5014	0.026274	1	54.539	9841800
1398	AAISIAASK	9	Q95H50	50S ribosomal protein L16, chloroplastic OS=Triticum aestivum OX=4565 GN=rpl16 PE=3 SV=1	0W_2	2	416.25	1.4984	NaN	0		7566600
1399	AAISIAASK	9	Q95H50	50S ribosomal protein L16, chloroplastic OS=Triticum aestivum OX=4565 GN=rpl16 PE=3 SV=1	2W_2	2	416.25	2.5923	NaN	0		695860
1400	AAISIAASK	9	Q95H50	50S ribosomal protein L16, chloroplastic OS=Triticum aestivum OX=4565 GN=rpl16 PE=3 SV=1	2W_3	2	416.25	2.3587	NaN	0		898100
1401	AAISSLQYHR	10	A0A3B6JRM0	FKS1_dom1 domain-containing protein OS=Triticum aestivum OX=4565 PE=4 SV=1	0W_1	3	382.54	0.29693	0.00041424	1	80.688	16029000
1402	AAISSLQYHR	10	A0A3B6JRM0	FKS1_dom1 domain-containing protein OS=Triticum aestivum OX=4565 PE=4 SV=1	0W_2	3	382.54	0.17573	0.00074354	1	71.451	14086000
1403	AAISSLQYHR	10	A0A3B6JRM0	FKS1_dom1 domain-containing protein OS=Triticum aestivum OX=4565 PE=4 SV=1	0W_3	3	382.54	-0.1422	0.00014555	1	91.087	12818000
1404	AAISSLQYHR	10	A0A3B6JRM0	FKS1_dom1 domain-containing protein OS=Triticum aestivum OX=4565 PE=4 SV=1	2W_1	3	382.54	0.022514	NaN	0		15710000
1405	AAISTSLR	8	A0A3B6NLG3	DNA polymerase V(predicted) OS=Triticum aestivum OX=4565 PE=4 SV=1	0W_1	2	409.74	-0.23195	0.033655	1	65.246	13900000
1406	AAISTSLR	8	A0A3B6NLG3	DNA polymerase V(predicted) OS=Triticum aestivum OX=4565 PE=4 SV=1	0W_2	2	409.74	-0.058275	0.027239	1	69.825	19618000
1407	AAISTSLR	8	A0A3B6NLG3	DNA polymerase V(predicted) OS=Triticum aestivum OX=4565 PE=4 SV=1	0W_3	2	409.74	-0.89859	0.016264	1	83.206	14316000
1408	AAISTSLR	8	A0A3B6NLG3	DNA polymerase V(predicted) OS=Triticum aestivum OX=4565 PE=4 SV=1	2W_2	2	409.74	-0.25345	NaN	0		16366000
1409	AAISTSLR	8	A0A3B6NLG3	DNA polymerase V(predicted) OS=Triticum aestivum OX=4565 PE=4 SV=1	2W_3	2	409.74	-0.3105	NaN	0		19361000
1410	AAIVSLLFPAEDFK	14	A0A3B6IZY4	Proliferating cell nuclear antigen OS=Triticum aestivum OX=4565 PE=3 SV=1	2W_2	2	760.922	0.71639	0.042996	1	34.432	2876800
1411	AAIVSLLFPAEDFK	14	A0A3B6IZY4	Proliferating cell nuclear antigen OS=Triticum aestivum OX=4565 PE=3 SV=1	0W_1	2	760.922	-0.61774	NaN	0		527140
1412	AAIVSLLFPAEDFK	14	A0A3B6IZY4	Proliferating cell nuclear antigen OS=Triticum aestivum OX=4565 PE=3 SV=1	2W_1	2	760.922	-1.3404	NaN	0		2606400
1413	AAIVSLLFPAEDFK	14	A0A3B6IZY4	Proliferating cell nuclear antigen OS=Triticum aestivum OX=4565 PE=3 SV=1	0W_2	2	760.922	-0.84921	NaN	0		530960
1414	AAIVSLLFPAEDFK	14	A0A3B6IZY4	Proliferating cell nuclear antigen OS=Triticum aestivum OX=4565 PE=3 SV=1	0W_3	2	760.922	0.21632	NaN	0		572180
1415	AAIVSLLFPAEDFK	14	A0A3B6IZY4	Proliferating cell nuclear antigen OS=Triticum aestivum OX=4565 PE=3 SV=1	2W_3	2	760.922	-0.13467	NaN	0		2981600
1416	AAKPPQYGYNTDTLVGR	17	A0A3B6NKJ4	J domain-containing protein OS=Triticum aestivum OX=4565 PE=4 SV=1	0W_1	3	617.651	0.80178	6.5605e-05	1	57.595	10858000
1417	AAKPPQYGYNTDTLVGR	17	A0A3B6NKJ4	J domain-containing protein OS=Triticum aestivum OX=4565 PE=4 SV=1	2W_1	3	617.651	0.97633	1.064e-05	1	66.809	19817000
1418	AAKPPQYGYNTDTLVGR	17	A0A3B6NKJ4	J domain-containing protein OS=Triticum aestivum OX=4565 PE=4 SV=1	0W_2	3	617.651	1.0324	6.9668e-06	1	68.845	9395400
1419	AAKPPQYGYNTDTLVGR	17	A0A3B6NKJ4	J domain-containing protein OS=Triticum aestivum OX=4565 PE=4 SV=1	2W_2	3	617.651	0.87024	9.7449e-07	1	95.677	19504000
1420	AAKPPQYGYNTDTLVGR	17	A0A3B6NKJ4	J domain-containing protein OS=Triticum aestivum OX=4565 PE=4 SV=1	0W_3	3	617.651	1.4645	0.00032896	1	51.495	11232000
1421	AAKPPQYGYNTDTLVGR	17	A0A3B6NKJ4	J domain-containing protein OS=Triticum aestivum OX=4565 PE=4 SV=1	2W_3	3	617.651	0.82043	7.6052e-11	1	114.27	24551000
1422	AAKPPQYGYNTDTLVGR	17	A0A3B6NKJ4	J domain-containing protein OS=Triticum aestivum OX=4565 PE=4 SV=1	2W_3	3	617.651	-1.0909	NaN	0		3175400
1423	AAKPSVAGVLESIPGVK	17	A0A3B5ZNF7	KOB1(predicted) OS=Triticum aestivum OX=4565 PE=4 SV=1	0W_1	3	541.654	-0.36432	0.022528	1	29.973	6426400
1424	AAKPSVAGVLESIPGVK	17	A0A3B5ZNF7	KOB1(predicted) OS=Triticum aestivum OX=4565 PE=4 SV=1	0W_2	3	541.654	-0.58484	0.0026575	1	40.693	9779300
1425	AAKPSVAGVLESIPGVK	17	A0A3B5ZNF7	KOB1(predicted) OS=Triticum aestivum OX=4565 PE=4 SV=1	0W_3	3	541.654	-0.90174	0.018755	1	31.115	7188800
1426	AAKPSVAGVLESIPGVK	17	A0A3B5ZNF7	KOB1(predicted) OS=Triticum aestivum OX=4565 PE=4 SV=1	2W_1	3	541.654	0.25382	NaN	0		3603700
1427	AAKPSVAGVLESIPGVK	17	A0A3B5ZNF7	KOB1(predicted) OS=Triticum aestivum OX=4565 PE=4 SV=1	2W_2	3	541.654	-0.4614	NaN	0		3876000
1428	AAKPSVAGVLESIPGVK	17	A0A3B5ZNF7	KOB1(predicted) OS=Triticum aestivum OX=4565 PE=4 SV=1	2W_3	3	541.654	-0.1888	NaN	0		2754400
1429	AALAAASDPYR	11	A0A3B6TIE7	Dethiobiotin synthetase (Fragment)(predicted) OS=Triticum aestivum OX=4565 PE=4 SV=1	2W_1	2	553.285	-0.50053	0.0023415	1	69.721	9069700
1430	AALAAASDPYR	11	A0A3B6TIE7	Dethiobiotin synthetase (Fragment)(predicted) OS=Triticum aestivum OX=4565 PE=4 SV=1	0W_2	2	553.285	0.53115	0.026135	1	44.847	6565700
1431	AALAAASDPYR	11	A0A3B6TIE7	Dethiobiotin synthetase (Fragment)(predicted) OS=Triticum aestivum OX=4565 PE=4 SV=1	2W_2	2	553.285	-0.12362	0.0013581	1	79.659	8831500
1432	AALAAASDPYR	11	A0A3B6TIE7	Dethiobiotin synthetase (Fragment)(predicted) OS=Triticum aestivum OX=4565 PE=4 SV=1	0W_3	2	553.285	-0.014437	0.020943	1	49.189	6821000
1433	AALAAASDPYR	11	A0A3B6TIE7	Dethiobiotin synthetase (Fragment)(predicted) OS=Triticum aestivum OX=4565 PE=4 SV=1	2W_3	2	553.285	-0.23996	0.0010834	1	82.417	8278900
1434	AALAAASDPYR	11	A0A3B6TIE7	Dethiobiotin synthetase (Fragment)(predicted) OS=Triticum aestivum OX=4565 PE=4 SV=1	0W_1	2	553.285	-0.39693	NaN	0		6146300
1435	AALAAASDPYR	11	A0A3B6TIE7	Dethiobiotin synthetase (Fragment)(predicted) OS=Triticum aestivum OX=4565 PE=4 SV=1	0W_3	2	553.285	5.2375	NaN	0		1208600
1436	AALAFDPRPPQFVPLESGAYK	21	A0A3B6RCU8	Expressed protein(predicted) OS=Triticum aestivum OX=4565 PE=4 SV=1	0W_1	3	758.735	-0.54535	0.011132	1	24.679	27085000
1437	AALAFDPRPPQFVPLESGAYK	21	A0A3B6RCU8	Expressed protein(predicted) OS=Triticum aestivum OX=4565 PE=4 SV=1	2W_1	3	758.735	-6.3285	NaN	0		3123500
1438	AALAHGFRPYDAVAEPGQTPADAN	24	A0A3B6QMY8	Protein WAX2(predicted) OS=Triticum aestivum OX=4565 PE=3 SV=1	0W_1	3	813.728	-0.20698	0.0029135	1	28.299	5866100
1439	AALAHGFRPYDAVAEPGQTPADAN	24	A0A3B6QMY8	Protein WAX2(predicted) OS=Triticum aestivum OX=4565 PE=3 SV=1	2W_1	3	813.728	0.84147	0.0014575	1	32.146	7459200
1440	AALAHGFRPYDAVAEPGQTPADAN	24	A0A3B6QMY8	Protein WAX2(predicted) OS=Triticum aestivum OX=4565 PE=3 SV=1	0W_2	3	813.728	0.066696	0.0026261	1	29.058	5925100
1441	AALAHGFRPYDAVAEPGQTPADAN	24	A0A3B6QMY8	Protein WAX2(predicted) OS=Triticum aestivum OX=4565 PE=3 SV=1	2W_2	3	813.728	0.44213	0.0020438	1	30.597	9419000
1442	AALAHGFRPYDAVAEPGQTPADAN	24	A0A3B6QMY8	Protein WAX2(predicted) OS=Triticum aestivum OX=4565 PE=3 SV=1	0W_3	3	813.728	-0.15212	0.012714	1	23.869	5539700
1443	AALAHGFRPYDAVAEPGQTPADAN	24	A0A3B6QMY8	Protein WAX2(predicted) OS=Triticum aestivum OX=4565 PE=3 SV=1	2W_3	3	813.728	0.1967	0.00013654	1	43.841	7722600
1444	AALAHGFRPYDAVAEPGQTPADAN	24	A0A3B6QMY8	Protein WAX2(predicted) OS=Triticum aestivum OX=4565 PE=3 SV=1	0W_1	3	813.728	1.0261	NaN	0		3834500
1445	AALCCGGPAR	10	A0A3B6B1P0	Amine oxidase OS=Triticum aestivum OX=4565 PE=3 SV=1	2W_1	2	516.739	1.3704	0.0034913	1	73.233	2856200
1446	AALCCGGPAR	10	A0A3B6B1P0	Amine oxidase OS=Triticum aestivum OX=4565 PE=3 SV=1	0W_2	2	516.739	-0.59253	0.017204	1	54.982	1771900
1447	AALCCGGPAR	10	A0A3B6B1P0	Amine oxidase OS=Triticum aestivum OX=4565 PE=3 SV=1	2W_2	2	516.739	0.3108	0.0029228	1	76.1	4040900
1448	AALCCGGPAR	10	A0A3B6B1P0	Amine oxidase OS=Triticum aestivum OX=4565 PE=3 SV=1	0W_3	2	516.739	-0.4189	0.016981	1	55.064	1834600
1449	AALCCGGPAR	10	A0A3B6B1P0	Amine oxidase OS=Triticum aestivum OX=4565 PE=3 SV=1	2W_3	2	516.739	0.52315	0.0025114	1	78.264	4011900
1450	AALCCGGPAR	10	A0A3B6B1P0	Amine oxidase OS=Triticum aestivum OX=4565 PE=3 SV=1	0W_1	2	516.739	-0.75697	NaN	0		1612800
1451	AALCLLR	7	A0A3B6J0Q3	AP-2 complex subunit alpha OS=Triticum aestivum OX=4565 PE=3 SV=1	0W_1	2	408.742	0.51305	0.031408	1	102.98	8219500
1452	AALCLLR	7	A0A3B6J0Q3	AP-2 complex subunit alpha OS=Triticum aestivum OX=4565 PE=3 SV=1	2W_1	2	408.742	0.62689	0.044453	1	88.734	10868000
1453	AALCLLR	7	A0A3B6J0Q3	AP-2 complex subunit alpha OS=Triticum aestivum OX=4565 PE=3 SV=1	0W_2	2	408.742	0.30582	0.044453	1	88.734	7957800
1454	AALCLLR	7	A0A3B6J0Q3	AP-2 complex subunit alpha OS=Triticum aestivum OX=4565 PE=3 SV=1	2W_2	2	408.742	1.0462	0.031408	1	102.98	11293000
1455	AALCLLR	7	A0A3B6J0Q3	AP-2 complex subunit alpha OS=Triticum aestivum OX=4565 PE=3 SV=1	0W_3	2	408.742	0.077427	0.050701	1	84.359	7086100
1456	AALCLLR	7	A0A3B6J0Q3	AP-2 complex subunit alpha OS=Triticum aestivum OX=4565 PE=3 SV=1	2W_3	2	408.742	0.59563	0.044453	1	88.734	13659000
1457	AALCYYCR	8	A0A077S547	PLATZ transcription factor (Fragment)(predicted) OS=Triticum aestivum OX=4565 GN=TRAES_3BF035900190CFD_c1 PE=4 SV=1	2W_1	2	538.736	-0.65767	0.032846	1	65.676	14790000
1458	AALCYYCR	8	A0A077S547	PLATZ transcription factor (Fragment)(predicted) OS=Triticum aestivum OX=4565 GN=TRAES_3BF035900190CFD_c1 PE=4 SV=1	2W_2	2	538.736	0.066807	0.025727	1	71.296	19165000
1459	AALCYYCR	8	A0A077S547	PLATZ transcription factor (Fragment)(predicted) OS=Triticum aestivum OX=4565 GN=TRAES_3BF035900190CFD_c1 PE=4 SV=1	0W_1	2	538.736	3.3108	NaN	0		417060
1460	AALCYYCR	8	A0A077S547	PLATZ transcription factor (Fragment)(predicted) OS=Triticum aestivum OX=4565 GN=TRAES_3BF035900190CFD_c1 PE=4 SV=1	2W_3	2	538.736	-0.21789	NaN	0		16153000
1461	AALDVESYGTGSQVK	15	W5FNF0	RNA polymerase II subunit A C-terminal domain phosphatase SSU72(predicted) OS=Triticum aestivum OX=4565 PE=4 SV=1	0W_1	2	762.881	0.38763	0.00051911	1	61.409	5968500
1462	AALDVESYGTGSQVK	15	W5FNF0	RNA polymerase II subunit A C-terminal domain phosphatase SSU72(predicted) OS=Triticum aestivum OX=4565 PE=4 SV=1	2W_1	2	762.881	0.084748	0.00018213	1	69.261	6862700
1463	AALDVESYGTGSQVK	15	W5FNF0	RNA polymerase II subunit A C-terminal domain phosphatase SSU72(predicted) OS=Triticum aestivum OX=4565 PE=4 SV=1	0W_2	2	762.881	0.075303	0.014531	1	39.163	4847900
1464	AALDVESYGTGSQVK	15	W5FNF0	RNA polymerase II subunit A C-terminal domain phosphatase SSU72(predicted) OS=Triticum aestivum OX=4565 PE=4 SV=1	2W_2	2	762.881	-0.27923	0.00018213	1	69.261	5939600
1465	AALDVESYGTGSQVK	15	W5FNF0	RNA polymerase II subunit A C-terminal domain phosphatase SSU72(predicted) OS=Triticum aestivum OX=4565 PE=4 SV=1	0W_3	2	762.881	0.56226	0.00056438	1	60.55	6348500
1466	AALDVESYGTGSQVK	15	W5FNF0	RNA polymerase II subunit A C-terminal domain phosphatase SSU72(predicted) OS=Triticum aestivum OX=4565 PE=4 SV=1	2W_3	2	762.881	-0.75469	0.00056438	1	60.55	8057700
1467	AALEAACPGTVSCADILALAAR	22	A0A3B6AZZ5	Peroxidase OS=Triticum aestivum OX=4565 PE=3 SV=1	0W_1	3	734.373	-0.63856	0.037772	1	17.43	2628900
1468	AALEAACPGTVSCADILALAAR	22	A0A3B6AZZ5	Peroxidase OS=Triticum aestivum OX=4565 PE=3 SV=1	2W_1	3	734.373	0.55361	0.00014424	1	53.359	9267100
1469	AALEAACPGTVSCADILALAAR	22	A0A3B6AZZ5	Peroxidase OS=Triticum aestivum OX=4565 PE=3 SV=1	0W_2	3	734.373	-0.85758	0.0018209	1	30.652	2393100
1470	AALEAACPGTVSCADILALAAR	22	A0A3B6AZZ5	Peroxidase OS=Triticum aestivum OX=4565 PE=3 SV=1	2W_2	3	734.373	0.53935	0.00024898	1	42.348	9834700
1471	AALEAACPGTVSCADILALAAR	22	A0A3B6AZZ5	Peroxidase OS=Triticum aestivum OX=4565 PE=3 SV=1	2W_3	3	734.373	0.63733	8.2879e-05	1	60.561	7106600
1472	AALEAACPGTVSCADILALAAR	22	A0A3B6AZZ5	Peroxidase OS=Triticum aestivum OX=4565 PE=3 SV=1	0W_3	3	734.373	0.60593	NaN	0		1545400
1473	AALEMLR	7	A0A3B6PFH4	Carboxypeptidase OS=Triticum aestivum OX=4565 PE=3 SV=1	0W_1	2	402.226	-0.68522	0.0354	1	97.602	7697100
1474	AALEMLR	7	A0A3B6PFH4	Carboxypeptidase OS=Triticum aestivum OX=4565 PE=3 SV=1	2W_1	2	402.226	-0.85581	0.03282	1	100.74	7516100
1475	AALEMLR	7	A0A3B6PFH4	Carboxypeptidase OS=Triticum aestivum OX=4565 PE=3 SV=1	0W_2	2	402.226	-0.66476	0.045379	1	88.029	7059300
1476	AALEMLR	7	A0A3B6PFH4	Carboxypeptidase OS=Triticum aestivum OX=4565 PE=3 SV=1	2W_2	2	402.226	-0.66909	0.050868	1	84.244	8649800
1477	AALEMLR	7	A0A3B6PFH4	Carboxypeptidase OS=Triticum aestivum OX=4565 PE=3 SV=1	2W_3	2	402.226	-0.28042	0.027313	1	110.61	9538300
1478	AALEMLR	7	A0A3B6PFH4	Carboxypeptidase OS=Triticum aestivum OX=4565 PE=3 SV=1	0W_3	2	402.226	-0.70303	NaN	0		7040400
1479	AALEPFATLDPAALASLPASTPLTVR	26	A0A3B5XSX8	CNH domain-containing protein OS=Triticum aestivum OX=4565 PE=4 SV=1	0W_1	3	865.146	-0.14594	0.032143	1	17.472	10753000
1480	AALEPFATLDPAALASLPASTPLTVR	26	A0A3B5XSX8	CNH domain-containing protein OS=Triticum aestivum OX=4565 PE=4 SV=1	2W_1	3	865.146	1.4923	0.00042551	1	30.597	36371000
1481	AALEPFATLDPAALASLPASTPLTVR	26	A0A3B5XSX8	CNH domain-containing protein OS=Triticum aestivum OX=4565 PE=4 SV=1	0W_2	3	865.146	-0.021922	0.053453	1	13.022	9965100
1482	AALEPFATLDPAALASLPASTPLTVR	26	A0A3B5XSX8	CNH domain-containing protein OS=Triticum aestivum OX=4565 PE=4 SV=1	2W_2	3	865.146	1.3607	2.3514e-17	1	91.733	41806000
1483	AALEPFATLDPAALASLPASTPLTVR	26	A0A3B5XSX8	CNH domain-containing protein OS=Triticum aestivum OX=4565 PE=4 SV=1	0W_3	3	865.146	1.2828	7.3487e-06	1	38.357	14939000
1484	AALEPFATLDPAALASLPASTPLTVR	26	A0A3B5XSX8	CNH domain-containing protein OS=Triticum aestivum OX=4565 PE=4 SV=1	2W_3	3	865.146	1.0744	5.6809e-07	1	48.773	27417000
1485	AALFFVR	7	A0A3B6JL75	Transmembrane 9 superfamily member OS=Triticum aestivum OX=4565 PE=3 SV=1	2W_2	2	412.245	-1.0917	0.05848	1	78.994	4245500
1486	AALFFVR	7	A0A3B6JL75	Transmembrane 9 superfamily member OS=Triticum aestivum OX=4565 PE=3 SV=1	0W_3	2	412.245	-1.0127	NaN	0		2413500
1487	AALFFVR	7	A0A3B6JL75	Transmembrane 9 superfamily member OS=Triticum aestivum OX=4565 PE=3 SV=1	2W_3	2	412.245	-1.0829	NaN	0		3065700
1488	AALFTHNDGR	10	A0A3B6MWR5	Protein ELC(predicted) OS=Triticum aestivum OX=4565 PE=4 SV=1	2W_1	3	367.853	0.13544	0.00088723	1	67.704	4974600
1489	AALFTHNDGR	10	A0A3B6MWR5	Protein ELC(predicted) OS=Triticum aestivum OX=4565 PE=4 SV=1	2W_2	3	367.853	0.28618	0.0021609	1	58.699	4323500
1490	AALFTHNDGR	10	A0A3B6MWR5	Protein ELC(predicted) OS=Triticum aestivum OX=4565 PE=4 SV=1	0W_3	3	367.853	0.28535	0.058185	1	28.088	1757300
1491	AALFTHNDGR	10	A0A3B6MWR5	Protein ELC(predicted) OS=Triticum aestivum OX=4565 PE=4 SV=1	2W_3	3	367.853	0.30186	0.0058412	1	50.194	5002300
1492	AALFTHNDGR	10	A0A3B6MWR5	Protein ELC(predicted) OS=Triticum aestivum OX=4565 PE=4 SV=1	0W_1	3	367.853	0.91579	NaN	0		1519200
1493	AALFTHNDGR	10	A0A3B6MWR5	Protein ELC(predicted) OS=Triticum aestivum OX=4565 PE=4 SV=1	0W_2	3	367.853	0.53367	NaN	0		1411800
1494	AALFYDNSLSGEDIYDPFLR	20	A0A3B6AVC7	V-type proton ATPase subunit H OS=Triticum aestivum OX=4565 PE=3 SV=1	2W_1	2	1153.55	0.26579	7.0682e-05	1	69.361	23559000
1495	AALFYDNSLSGEDIYDPFLR	20	A0A3B6AVC7	V-type proton ATPase subunit H OS=Triticum aestivum OX=4565 PE=3 SV=1	2W_2	2	1153.55	0.075842	6.811e-06	1	77.08	26011000
1496	AALFYDNSLSGEDIYDPFLR	20	A0A3B6AVC7	V-type proton ATPase subunit H OS=Triticum aestivum OX=4565 PE=3 SV=1	2W_3	2	1153.55	0.17586	7.0682e-05	1	69.361	15971000
1497	AALGEFVEAIDDLTK	15	A0A3B6C870	Tetratricopeptide repeat protein 13(predicted) OS=Triticum aestivum OX=4565 PE=4 SV=1	2W_1	3	531.279	0.079768	0.0005389	1	49.188	4379300
1498	AALGEFVEAIDDLTK	15	A0A3B6C870	Tetratricopeptide repeat protein 13(predicted) OS=Triticum aestivum OX=4565 PE=4 SV=1	2W_2	3	531.279	-0.35632	0.00015403	1	56.527	2544200
1499	AALGEFVEAIDDLTK	15	A0A3B6C870	Tetratricopeptide repeat protein 13(predicted) OS=Triticum aestivum OX=4565 PE=4 SV=1	2W_3	3	531.279	-0.41124	0.00011771	1	59.709	3541600
1500	AALHDPDGILGDWIVTAGR	19	A0A3B5ZR99	Protein kinase domain-containing protein OS=Triticum aestivum OX=4565 PE=3 SV=1	0W_1	3	659.678	0.72103	8.7346e-06	1	69.422	7618600
1501	AALHDPDGILGDWIVTAGR	19	A0A3B5ZR99	Protein kinase domain-containing protein OS=Triticum aestivum OX=4565 PE=3 SV=1	2W_2	3	659.678	-0.59171	0.0010167	1	35.625	7331400
1502	AALHDPDGILGDWIVTAGR	19	A0A3B5ZR99	Protein kinase domain-containing protein OS=Triticum aestivum OX=4565 PE=3 SV=1	0W_3	3	659.678	0.56957	0.0001674	1	52.814	6259400
1503	AALHDPDGILGDWIVTAGR	19	A0A3B5ZR99	Protein kinase domain-containing protein OS=Triticum aestivum OX=4565 PE=3 SV=1	2W_1	3	659.678	-0.53551	NaN	0		11010000
1504	AALHDPDGILGDWIVTAGR	19	A0A3B5ZR99	Protein kinase domain-containing protein OS=Triticum aestivum OX=4565 PE=3 SV=1	0W_2	3	659.678	-0.19166	NaN	0		7582000
1505	AALHDPDGILGDWIVTAGR	19	A0A3B5ZR99	Protein kinase domain-containing protein OS=Triticum aestivum OX=4565 PE=3 SV=1	2W_3	3	659.678	0.0027886	NaN	0		8428700
1506	AALLGCLYNR	10	A0A3B6KAG5	Utp12 domain-containing protein OS=Triticum aestivum OX=4565 PE=4 SV=1	0W_1	2	575.806	-0.5893	0.00041312	1	95.502	31768000
1507	AALLGCLYNR	10	A0A3B6KAG5	Utp12 domain-containing protein OS=Triticum aestivum OX=4565 PE=4 SV=1	2W_1	2	575.806	-1.6166	0.0066503	1	64.654	24708000
1508	AALLGCLYNR	10	A0A3B6KAG5	Utp12 domain-containing protein OS=Triticum aestivum OX=4565 PE=4 SV=1	0W_2	2	575.806	-0.49841	0.0032647	1	74.376	37565000
1509	AALLGCLYNR	10	A0A3B6KAG5	Utp12 domain-containing protein OS=Triticum aestivum OX=4565 PE=4 SV=1	2W_2	2	575.806	-1.3442	0.0077425	1	63.216	25000000
1510	AALLGCLYNR	10	A0A3B6KAG5	Utp12 domain-containing protein OS=Triticum aestivum OX=4565 PE=4 SV=1	0W_3	2	575.806	-1.0292	0.0016456	1	83.948	37383000
1511	AALLGCLYNR	10	A0A3B6KAG5	Utp12 domain-containing protein OS=Triticum aestivum OX=4565 PE=4 SV=1	2W_3	2	575.806	-1.387	0.0034913	1	73.233	26416000
1512	AALLVGPQSNAPQVPR	16	A0A2X0TRX7	MI domain-containing protein OS=Triticum aestivum OX=4565 GN=CAMPLR22A2D_LOCUS1992 PE=4 SV=1	0W_1	2	809.457	-0.37149	0.00018302	1	58.885	8271600
1513	AALLVGPQSNAPQVPR	16	A0A2X0TRX7	MI domain-containing protein OS=Triticum aestivum OX=4565 GN=CAMPLR22A2D_LOCUS1992 PE=4 SV=1	2W_1	2	809.457	-0.1199	0.00039961	1	55.66	11859000
1514	AALLVGPQSNAPQVPR	16	A0A2X0TRX7	MI domain-containing protein OS=Triticum aestivum OX=4565 GN=CAMPLR22A2D_LOCUS1992 PE=4 SV=1	0W_2	2	809.457	-0.29867	8.0693e-05	1	65.374	7485000
1515	AALLVGPQSNAPQVPR	16	A0A2X0TRX7	MI domain-containing protein OS=Triticum aestivum OX=4565 GN=CAMPLR22A2D_LOCUS1992 PE=4 SV=1	2W_2	2	809.457	-0.83295	5.0862e-05	1	67.326	11869000
1516	AALLVGPQSNAPQVPR	16	A0A2X0TRX7	MI domain-containing protein OS=Triticum aestivum OX=4565 GN=CAMPLR22A2D_LOCUS1992 PE=4 SV=1	0W_3	2	809.457	-0.227	0.011742	1	38.376	8735400
1517	AALLVGPQSNAPQVPR	16	A0A2X0TRX7	MI domain-containing protein OS=Triticum aestivum OX=4565 GN=CAMPLR22A2D_LOCUS1992 PE=4 SV=1	2W_3	2	809.457	-0.57963	2.8421e-05	1	73.834	10325000
1518	AALNDFDRFK	10	A0A3B6DGT8	Ribosomal_L14e domain-containing protein OS=Triticum aestivum OX=4565 PE=4 SV=1	2W_2	3	399.54	0.029015	0.00085322	1	81.525	6286200
1519	AALNDFDRFK	10	A0A3B6DGT8	Ribosomal_L14e domain-containing protein OS=Triticum aestivum OX=4565 PE=4 SV=1	0W_1	3	399.54	-0.10893	NaN	0		3539000
1520	AALNDFDRFK	10	A0A3B6DGT8	Ribosomal_L14e domain-containing protein OS=Triticum aestivum OX=4565 PE=4 SV=1	2W_1	3	399.54	-0.23558	NaN	0		8496100
1521	AALNDFDRFK	10	A0A3B6DGT8	Ribosomal_L14e domain-containing protein OS=Triticum aestivum OX=4565 PE=4 SV=1	0W_2	3	399.54	-0.055581	NaN	0		2718100
1522	AALNDFDRFK	10	A0A3B6DGT8	Ribosomal_L14e domain-containing protein OS=Triticum aestivum OX=4565 PE=4 SV=1	0W_3	3	399.54	-0.23551	NaN	0		3198500
1523	AALNDFDRFK	10	A0A3B6DGT8	Ribosomal_L14e domain-containing protein OS=Triticum aestivum OX=4565 PE=4 SV=1	2W_3	3	399.54	-0.087689	NaN	0		8256600
1524	AALNLASYGGSHALK	15	A0A3B6PLA1	Myb-like domain-containing protein OS=Triticum aestivum OX=4565 PE=4 SV=1	2W_1	3	491.6	-0.31005	0.0028618	1	38.995	13859000
1525	AALNLASYGGSHALK	15	A0A3B6PLA1	Myb-like domain-containing protein OS=Triticum aestivum OX=4565 PE=4 SV=1	2W_1	3	491.6	1.2461	0.0025497	1	40.008	44767000
1526	AALNLASYGGSHALK	15	A0A3B6PLA1	Myb-like domain-containing protein OS=Triticum aestivum OX=4565 PE=4 SV=1	2W_2	3	491.6	-0.94363	0.00062707	1	47.506	12503000
1527	AALNLASYGGSHALK	15	A0A3B6PLA1	Myb-like domain-containing protein OS=Triticum aestivum OX=4565 PE=4 SV=1	2W_2	3	491.6	0.85899	0.053983	1	20.093	45326000
1528	AALNLASYGGSHALK	15	A0A3B6PLA1	Myb-like domain-containing protein OS=Triticum aestivum OX=4565 PE=4 SV=1	2W_2	2	736.896	2.3054	0.0053506	1	44.925	10761000
1529	AALNLASYGGSHALK	15	A0A3B6PLA1	Myb-like domain-containing protein OS=Triticum aestivum OX=4565 PE=4 SV=1	0W_3	3	491.6	-1.0919	0.0038737	1	35.711	18071000
1530	AALNLASYGGSHALK	15	A0A3B6PLA1	Myb-like domain-containing protein OS=Triticum aestivum OX=4565 PE=4 SV=1	2W_3	3	491.6	-0.11051	0.026355	1	25.303	13372000
1531	AALNLASYGGSHALK	15	A0A3B6PLA1	Myb-like domain-containing protein OS=Triticum aestivum OX=4565 PE=4 SV=1	2W_3	3	491.6	1.2725	0.0032394	1	37.77	39969000
1532	AALNLASYGGSHALK	15	A0A3B6PLA1	Myb-like domain-containing protein OS=Triticum aestivum OX=4565 PE=4 SV=1	2W_3	2	736.896	2.5252	0.00045165	1	62.69	8968600
1533	AALNLASYGGSHALK	15	A0A3B6PLA1	Myb-like domain-containing protein OS=Triticum aestivum OX=4565 PE=4 SV=1	0W_1	3	491.6	-0.83835	NaN	0		14297000
1534	AALNLASYGGSHALK	15	A0A3B6PLA1	Myb-like domain-containing protein OS=Triticum aestivum OX=4565 PE=4 SV=1	0W_1	2	736.896	2.8062	NaN	0		5737300
1535	AALNLASYGGSHALK	15	A0A3B6PLA1	Myb-like domain-containing protein OS=Triticum aestivum OX=4565 PE=4 SV=1	2W_1	2	736.896	2.5263	NaN	0		9556500
1536	AALNLASYGGSHALK	15	A0A3B6PLA1	Myb-like domain-containing protein OS=Triticum aestivum OX=4565 PE=4 SV=1	0W_2	3	491.6	-0.85354	NaN	0		16317000
1537	AALNLASYGGSHALK	15	A0A3B6PLA1	Myb-like domain-containing protein OS=Triticum aestivum OX=4565 PE=4 SV=1	0W_2	2	736.896	3.0047	NaN	0		4893600
1538	AALNLASYGGSHALK	15	A0A3B6PLA1	Myb-like domain-containing protein OS=Triticum aestivum OX=4565 PE=4 SV=1	0W_3	2	736.896	2.635	NaN	0		4909400
1539	AALNLGGTMLGFYPVR	16	A0A3B6EGL7	CID11(predicted) OS=Triticum aestivum OX=4565 PE=4 SV=1	0W_1	2	848.448	-1.3423	4.2943e-05	1	63.29	9685000
1540	AALNLGGTMLGFYPVR	16	A0A3B6EGL7	CID11(predicted) OS=Triticum aestivum OX=4565 PE=4 SV=1	0W_2	2	848.448	-0.86524	3.1444e-05	1	65.219	6811600
1541	AALNLGGTMLGFYPVR	16	A0A3B6EGL7	CID11(predicted) OS=Triticum aestivum OX=4565 PE=4 SV=1	0W_3	2	848.448	-0.98746	1.1968e-05	1	72.898	6599300
1542	AALNLGGTMLGFYPVR	16	A0A3B6EGL7	CID11(predicted) OS=Triticum aestivum OX=4565 PE=4 SV=1	2W_3	2	848.448	-2.0269	8.277e-07	1	102.5	21153000
1543	AALNLGGTMLGFYPVR	16	A0A3B6EGL7	CID11(predicted) OS=Triticum aestivum OX=4565 PE=4 SV=1	2W_1	2	848.448	-1.7831	NaN	0		19916000
1544	AALNLGGTMLGFYPVR	16	A0A3B6EGL7	CID11(predicted) OS=Triticum aestivum OX=4565 PE=4 SV=1	2W_2	2	848.448	-1.724	NaN	0		18141000
1545	AALNLSGTVLGYYPVR	16	A0A3B6SI08	RRM domain-containing protein OS=Triticum aestivum OX=4565 PE=4 SV=1	0W_1	2	847.467	0.45744	2.1308e-07	1	109.07	24612000
1546	AALNLSGTVLGYYPVR	16	A0A3B6SI08	RRM domain-containing protein OS=Triticum aestivum OX=4565 PE=4 SV=1	0W_1	3	565.314	0.86688	0.0021209	1	38.995	4563400
1547	AALNLSGTVLGYYPVR	16	A0A3B6SI08	RRM domain-containing protein OS=Triticum aestivum OX=4565 PE=4 SV=1	2W_1	2	847.467	0.50095	1.3564e-29	1	152	95601000
1548	AALNLSGTVLGYYPVR	16	A0A3B6SI08	RRM domain-containing protein OS=Triticum aestivum OX=4565 PE=4 SV=1	2W_1	3	565.314	0.56183	0.019766	1	26.548	16650000
1549	AALNLSGTVLGYYPVR	16	A0A3B6SI08	RRM domain-containing protein OS=Triticum aestivum OX=4565 PE=4 SV=1	0W_2	2	847.467	0.7867	2.3877e-20	1	136.83	37606000
1550	AALNLSGTVLGYYPVR	16	A0A3B6SI08	RRM domain-containing protein OS=Triticum aestivum OX=4565 PE=4 SV=1	2W_2	2	847.467	0.99301	1.2334e-32	1	159	104100000
1551	AALNLSGTVLGYYPVR	16	A0A3B6SI08	RRM domain-containing protein OS=Triticum aestivum OX=4565 PE=4 SV=1	0W_3	2	847.467	0.64271	7.7433e-10	1	118.51	26035000
1552	AALNLSGTVLGYYPVR	16	A0A3B6SI08	RRM domain-containing protein OS=Triticum aestivum OX=4565 PE=4 SV=1	2W_3	2	847.467	0.95906	3.112e-14	2	128.22	90070000
1553	AALNLSGTVLGYYPVR	16	A0A3B6SI08	RRM domain-containing protein OS=Triticum aestivum OX=4565 PE=4 SV=1	0W_2	3	565.314	0.87517	NaN	0		4782800
1554	AALNLSGTVLGYYPVR	16	A0A3B6SI08	RRM domain-containing protein OS=Triticum aestivum OX=4565 PE=4 SV=1	2W_2	3	565.314	0.61365	NaN	0		17712000
1555	AALNLSGTVLGYYPVR	16	A0A3B6SI08	RRM domain-containing protein OS=Triticum aestivum OX=4565 PE=4 SV=1	0W_3	3	565.314	1.2104	NaN	0		3428000
1556	AALNLSGTVLGYYPVR	16	A0A3B6SI08	RRM domain-containing protein OS=Triticum aestivum OX=4565 PE=4 SV=1	2W_3	3	565.314	0.96755	NaN	0		13598000
1557	AALNSGIGWR	10	A0A3B6MZF9	Leuk-A4-hydro_C domain-containing protein OS=Triticum aestivum OX=4565 PE=4 SV=1	0W_1	2	522.783	2.5496	0.024551	1	51.436	9290500
1558	AALNSGIGWR	10	A0A3B6MZF9	Leuk-A4-hydro_C domain-containing protein OS=Triticum aestivum OX=4565 PE=4 SV=1	0W_2	2	522.783	1.9983	NaN	0		10033000
1559	AALNSGIGWR	10	A0A3B6MZF9	Leuk-A4-hydro_C domain-containing protein OS=Triticum aestivum OX=4565 PE=4 SV=1	0W_3	2	522.783	0.11275	NaN	0		7405400
1560	AALNSGIGWR	10	A0A3B6MZF9	Leuk-A4-hydro_C domain-containing protein OS=Triticum aestivum OX=4565 PE=4 SV=1	2W_3	2	522.783	2.5777	NaN	0		3113500
1561	AALPHALCGHDVLGAAK	17	A0A3B6AX49	DEAD-box ATP-dependent RNA helicase 32(predicted) OS=Triticum aestivum OX=4565 PE=3 SV=1	0W_1	3	567.635	0.11648	2.3018e-06	1	71.781	36220000
1562	AALPHALCGHDVLGAAK	17	A0A3B6AX49	DEAD-box ATP-dependent RNA helicase 32(predicted) OS=Triticum aestivum OX=4565 PE=3 SV=1	0W_2	3	567.635	0.082034	0.0002563	1	46.873	32401000
1563	AALPHALCGHDVLGAAK	17	A0A3B6AX49	DEAD-box ATP-dependent RNA helicase 32(predicted) OS=Triticum aestivum OX=4565 PE=3 SV=1	0W_3	3	567.635	0.41581	1.1273e-05	1	64.454	31476000
1564	AALPHALCGHDVLGAAK	17	A0A3B6AX49	DEAD-box ATP-dependent RNA helicase 32(predicted) OS=Triticum aestivum OX=4565 PE=3 SV=1	2W_1	3	567.635	-0.29971	NaN	0		17652000
1565	AALPHALCGHDVLGAAK	17	A0A3B6AX49	DEAD-box ATP-dependent RNA helicase 32(predicted) OS=Triticum aestivum OX=4565 PE=3 SV=1	2W_2	3	567.635	-0.23396	NaN	0		19909000
1566	AALPHALCGHDVLGAAK	17	A0A3B6AX49	DEAD-box ATP-dependent RNA helicase 32(predicted) OS=Triticum aestivum OX=4565 PE=3 SV=1	2W_3	3	567.635	0.054959	NaN	0		20815000
1567	AALPVGTVSGAPK	13	A0A3B6IV17	Anthranilate synthase alpha 1 subunit(predicted) OS=Triticum aestivum OX=4565 PE=4 SV=1	0W_1	2	584.34	0.14008	0.0079933	1	48.229	9454600
1568	AALQEAYSTPILPLDILAERPPVK	24	A0A3B6GQS5	Translocon-associated protein subunit beta(predicted) OS=Triticum aestivum OX=4565 PE=4 SV=1	0W_1	4	652.12	0.18194	0.013243	1	22.257	4569700
1569	AALQEAYSTPILPLDILAERPPVK	24	A0A3B6GQS5	Translocon-associated protein subunit beta(predicted) OS=Triticum aestivum OX=4565 PE=4 SV=1	2W_1	3	869.158	0.46043	0.00019337	1	39.21	120500000
1570	AALQEAYSTPILPLDILAERPPVK	24	A0A3B6GQS5	Translocon-associated protein subunit beta(predicted) OS=Triticum aestivum OX=4565 PE=4 SV=1	2W_1	4	652.12	0.8943	5.0987e-05	1	46.065	14555000
1571	AALQEAYSTPILPLDILAERPPVK	24	A0A3B6GQS5	Translocon-associated protein subunit beta(predicted) OS=Triticum aestivum OX=4565 PE=4 SV=1	2W_2	3	869.158	0.084669	0.00018262	1	40.086	114800000
1572	AALQEAYSTPILPLDILAERPPVK	24	A0A3B6GQS5	Translocon-associated protein subunit beta(predicted) OS=Triticum aestivum OX=4565 PE=4 SV=1	2W_2	4	652.12	0.70788	0.00099108	1	30.36	13234000
1573	AALQEAYSTPILPLDILAERPPVK	24	A0A3B6GQS5	Translocon-associated protein subunit beta(predicted) OS=Triticum aestivum OX=4565 PE=4 SV=1	0W_3	3	869.158	-0.066091	0.0013054	1	32.548	47836000
1574	AALQEAYSTPILPLDILAERPPVK	24	A0A3B6GQS5	Translocon-associated protein subunit beta(predicted) OS=Triticum aestivum OX=4565 PE=4 SV=1	0W_3	4	652.12	0.088224	0.033821	1	17.734	4327800
1575	AALQEAYSTPILPLDILAERPPVK	24	A0A3B6GQS5	Translocon-associated protein subunit beta(predicted) OS=Triticum aestivum OX=4565 PE=4 SV=1	2W_3	3	869.158	-0.04833	0.00022943	1	36.271	124280000
1576	AALQEAYSTPILPLDILAERPPVK	24	A0A3B6GQS5	Translocon-associated protein subunit beta(predicted) OS=Triticum aestivum OX=4565 PE=4 SV=1	2W_3	4	652.12	0.37374	0.0010798	1	29.855	14166000
1577	AALQEAYSTPILPLDILAERPPVK	24	A0A3B6GQS5	Translocon-associated protein subunit beta(predicted) OS=Triticum aestivum OX=4565 PE=4 SV=1	0W_1	3	869.158	-0.35379	NaN	0		51064000
1578	AALQEAYSTPILPLDILAERPPVK	24	A0A3B6GQS5	Translocon-associated protein subunit beta(predicted) OS=Triticum aestivum OX=4565 PE=4 SV=1	0W_2	3	869.158	-0.28416	NaN	0		42045000
1579	AALQEAYSTPILPLDILAERPPVK	24	A0A3B6GQS5	Translocon-associated protein subunit beta(predicted) OS=Triticum aestivum OX=4565 PE=4 SV=1	0W_2	4	652.12	-0.10208	NaN	0		3698800
1580	AALQEAYSTPIPPLDILAERPPVK	24	A0A3B6FHR7	Translocon-associated protein subunit beta(predicted) OS=Triticum aestivum OX=4565 PE=4 SV=1	2W_1	3	863.814	0.022588	1.6091e-06	1	69.071	51298000
1581	AALQEAYSTPIPPLDILAERPPVK	24	A0A3B6FHR7	Translocon-associated protein subunit beta(predicted) OS=Triticum aestivum OX=4565 PE=4 SV=1	2W_2	3	863.814	-0.2018	1.3767e-06	1	70.345	43905000
1582	AALQEAYSTPIPPLDILAERPPVK	24	A0A3B6FHR7	Translocon-associated protein subunit beta(predicted) OS=Triticum aestivum OX=4565 PE=4 SV=1	2W_3	3	863.814	-0.052433	8.6342e-05	1	50.271	59490000
1583	AALQEAYSTPIPPLDILAERPPVK	24	A0A3B6FHR7	Translocon-associated protein subunit beta(predicted) OS=Triticum aestivum OX=4565 PE=4 SV=1	0W_1	3	863.814	-0.10822	NaN	0		2195600
1584	AALQEAYSTPIPPLDILAERPPVK	24	A0A3B6FHR7	Translocon-associated protein subunit beta(predicted) OS=Triticum aestivum OX=4565 PE=4 SV=1	0W_2	3	863.814	-0.2854	NaN	0		1294200
1585	AALQEAYSTPIPPLDILAERPPVK	24	A0A3B6FHR7	Translocon-associated protein subunit beta(predicted) OS=Triticum aestivum OX=4565 PE=4 SV=1	0W_3	3	863.814	-0.2411	NaN	0		1989800
1586	AALQFIHGLK	10	A0A3B6KD85	Calcium-transporting ATPase OS=Triticum aestivum OX=4565 PE=3 SV=1	0W_1	3	366.554	-0.24598	0.057681	1	28.204	1866500
1587	AALQFIHGLK	10	A0A3B6KD85	Calcium-transporting ATPase OS=Triticum aestivum OX=4565 PE=3 SV=1	2W_1	3	366.554	-0.41146	0.020663	1	38.754	1843500
1588	AALQFIHGLK	10	A0A3B6KD85	Calcium-transporting ATPase OS=Triticum aestivum OX=4565 PE=3 SV=1	0W_2	3	366.554	-0.76076	0.024722	1	36.424	3274100
1589	AALQFIHGLK	10	A0A3B6KD85	Calcium-transporting ATPase OS=Triticum aestivum OX=4565 PE=3 SV=1	2W_2	3	366.554	-0.62952	0.0080435	1	46.001	2540400
1590	AALQFIHGLK	10	A0A3B6KD85	Calcium-transporting ATPase OS=Triticum aestivum OX=4565 PE=3 SV=1	0W_3	3	366.554	-0.56155	0.050859	1	29.774	1759400
1591	AALQFIHGLK	10	A0A3B6KD85	Calcium-transporting ATPase OS=Triticum aestivum OX=4565 PE=3 SV=1	2W_3	3	366.554	-0.20165	NaN	0		3891600
1592	AALQWAADNLLR	12	A0A3B5ZR06	Usp domain-containing protein OS=Triticum aestivum OX=4565 PE=4 SV=1	0W_1	2	671.367	0.82226	3.1908e-06	1	105.2	39602000
1593	AALQWAADNLLR	12	A0A3B5ZR06	Usp domain-containing protein OS=Triticum aestivum OX=4565 PE=4 SV=1	2W_1	2	671.367	0.47081	0.00044745	1	81.92	73740000
1594	AALQWAADNLLR	12	A0A3B5ZR06	Usp domain-containing protein OS=Triticum aestivum OX=4565 PE=4 SV=1	0W_2	2	671.367	1.3947	0.00056324	1	78.903	45090000
1595	AALQWAADNLLR	12	A0A3B5ZR06	Usp domain-containing protein OS=Triticum aestivum OX=4565 PE=4 SV=1	2W_2	2	671.367	0.21762	2.3702e-12	1	131.12	71480000
1596	AALQWAADNLLR	12	A0A3B5ZR06	Usp domain-containing protein OS=Triticum aestivum OX=4565 PE=4 SV=1	0W_3	2	671.367	0.55685	0.00020111	1	88.338	69881000
1597	AALQWAADNLLR	12	A0A3B5ZR06	Usp domain-containing protein OS=Triticum aestivum OX=4565 PE=4 SV=1	2W_3	2	671.367	0.60584	2.6465e-12	1	127.87	81389000
1598	AALSDDYFIK	10	A0A3B6KQ76	Citrate synthase OS=Triticum aestivum OX=4565 PE=3 SV=1	2W_1	2	571.79	1.2829	0.035394	1	48.284	6269400
1599	AALSDDYFIK	10	A0A3B6KQ76	Citrate synthase OS=Triticum aestivum OX=4565 PE=3 SV=1	2W_2	2	571.79	1.1043	0.035394	1	48.284	6693500
1600	AALSDDYFIK	10	A0A3B6KQ76	Citrate synthase OS=Triticum aestivum OX=4565 PE=3 SV=1	2W_3	2	571.79	1.1258	0.035394	1	48.284	6636600
1601	AALSDDYFIK	10	A0A3B6KQ76	Citrate synthase OS=Triticum aestivum OX=4565 PE=3 SV=1	0W_1	2	571.79	-0.064854	NaN	0		5391500
1602	AALSDDYFIK	10	A0A3B6KQ76	Citrate synthase OS=Triticum aestivum OX=4565 PE=3 SV=1	0W_2	2	571.79	0.12633	NaN	0		5934400
1603	AALSDDYFIK	10	A0A3B6KQ76	Citrate synthase OS=Triticum aestivum OX=4565 PE=3 SV=1	0W_3	2	571.79	0.020393	NaN	0		5889300
1604	AALSDEYFIK	10	A0A3B6MYE4	Citrate synthase OS=Triticum aestivum OX=4565 PE=3 SV=1	0W_1	2	578.798	-0.18985	0.012061	1	57.532	17432000
1605	AALSDEYFIK	10	A0A3B6MYE4	Citrate synthase OS=Triticum aestivum OX=4565 PE=3 SV=1	0W_2	2	578.798	-1.3867	0.011869	1	57.785	18571000
1606	AALSDEYFIK	10	A0A3B6MYE4	Citrate synthase OS=Triticum aestivum OX=4565 PE=3 SV=1	2W_2	2	578.798	-0.12851	0.033501	1	48.981	24355000
1607	AALSDEYFIK	10	A0A3B6MYE4	Citrate synthase OS=Triticum aestivum OX=4565 PE=3 SV=1	0W_3	2	578.798	-1.2156	0.033501	1	48.981	15983000
1608	AALSDEYFIK	10	A0A3B6MYE4	Citrate synthase OS=Triticum aestivum OX=4565 PE=3 SV=1	2W_1	2	578.798	-1.1811	NaN	0		21674000
1609	AALSDEYFIK	10	A0A3B6MYE4	Citrate synthase OS=Triticum aestivum OX=4565 PE=3 SV=1	2W_3	2	578.798	-0.86886	NaN	0		21289000
1610	AALSETLR	8	A0A3B6CB18	Cytochrome P450 86A22(predicted) OS=Triticum aestivum OX=4565 PE=3 SV=1	0W_1	2	430.745	0.56737	0.013296	1	89.752	46117000
1611	AALSETLR	8	A0A3B6CB18	Cytochrome P450 86A22(predicted) OS=Triticum aestivum OX=4565 PE=3 SV=1	2W_1	2	430.745	-0.44259	0.011773	1	96.492	60765000
1612	AALSETLR	8	A0A3B6CB18	Cytochrome P450 86A22(predicted) OS=Triticum aestivum OX=4565 PE=3 SV=1	0W_2	2	430.745	0.85069	0.023721	1	73.248	31234000
1613	AALSETLR	8	A0A3B6CB18	Cytochrome P450 86A22(predicted) OS=Triticum aestivum OX=4565 PE=3 SV=1	2W_2	2	430.745	0.32389	0.013989	1	87.696	49106000
1614	AALSETLR	8	A0A3B6CB18	Cytochrome P450 86A22(predicted) OS=Triticum aestivum OX=4565 PE=3 SV=1	0W_3	2	430.745	0.58893	0.012466	1	93.429	40394000
1615	AALSETLR	8	A0A3B6CB18	Cytochrome P450 86A22(predicted) OS=Triticum aestivum OX=4565 PE=3 SV=1	2W_3	2	430.745	0.019781	0.012466	1	93.429	66465000
1616	AALSRPDSLSDATAR	15	A0A3B6JIE9	PRA1 family protein OS=Triticum aestivum OX=4565 PE=3 SV=1	2W_1	3	510.934	1.4171	9.9001e-05	1	66.826	8283700
1617	AALSRPDSLSDATAR	15	A0A3B6JIE9	PRA1 family protein OS=Triticum aestivum OX=4565 PE=3 SV=1	2W_2	3	510.934	0.78546	3.0217e-05	1	79.346	9319600
1618	AALSRPDSLSDATAR	15	A0A3B6JIE9	PRA1 family protein OS=Triticum aestivum OX=4565 PE=3 SV=1	2W_3	3	510.934	1.4914	2.7388e-05	1	78.69	10692000
1619	AALSRPDSLSDATAR	15	A0A3B6JIE9	PRA1 family protein OS=Triticum aestivum OX=4565 PE=3 SV=1	0W_1	3	510.934	0.4318	NaN	0		5989200
1620	AALSRPDSLSDATAR	15	A0A3B6JIE9	PRA1 family protein OS=Triticum aestivum OX=4565 PE=3 SV=1	0W_2	3	510.934	0.5279	NaN	0		5078200
1621	AALSRPDSLSDATAR	15	A0A3B6JIE9	PRA1 family protein OS=Triticum aestivum OX=4565 PE=3 SV=1	0W_3	3	510.934	0.4458	NaN	0		6059100
1622	AALVELFTR	9	A0A3B6KIF0	TLC domain-containing protein OS=Triticum aestivum OX=4565 PE=4 SV=1	0W_1	2	531.303	0.32807	0.019214	1	48.091	784680
1623	AALVELFTR	9	A0A3B6KIF0	TLC domain-containing protein OS=Triticum aestivum OX=4565 PE=4 SV=1	2W_2	2	531.303	0.59003	0.0073938	1	56.916	1766000
1624	AALVELFTR	9	A0A3B6KIF0	TLC domain-containing protein OS=Triticum aestivum OX=4565 PE=4 SV=1	2W_3	2	531.303	0.6773	0.0012905	1	81.972	2365100
1625	AALVELFTR	9	A0A3B6KIF0	TLC domain-containing protein OS=Triticum aestivum OX=4565 PE=4 SV=1	2W_1	2	531.303	0.62344	NaN	0		1926000
1626	AALVELFTR	9	A0A3B6KIF0	TLC domain-containing protein OS=Triticum aestivum OX=4565 PE=4 SV=1	0W_2	2	531.303	0.77938	NaN	0		1736400
1627	AALVELFTR	9	A0A3B6KIF0	TLC domain-containing protein OS=Triticum aestivum OX=4565 PE=4 SV=1	0W_3	2	531.303	1.3789	NaN	0		784800
1628	AALVETSMGVVR	12	A0A3B6UB31	ABCF1 (Fragment)(predicted) OS=Triticum aestivum OX=4565 PE=4 SV=1	2W_1	2	637.842	1.2039	9.6894e-05	1	87.184	5254700
1629	AALVETSMGVVR	12	A0A3B6UB31	ABCF1 (Fragment)(predicted) OS=Triticum aestivum OX=4565 PE=4 SV=1	2W_2	2	637.842	1.6049	0.0003762	1	67.385	5762600
1630	AALVETSMGVVR	12	A0A3B6UB31	ABCF1 (Fragment)(predicted) OS=Triticum aestivum OX=4565 PE=4 SV=1	2W_3	2	637.842	1.8873	0.0003762	1	67.385	5520000
1631	AALVEYQVQK	10	A0A341TM85	Uncharacterized protein OS=Triticum aestivum OX=4565 PE=4 SV=1	2W_1	2	574.819	0.53784	0.0002544	1	97.565	15897000
1632	AALVEYQVQK	10	A0A341TM85	Uncharacterized protein OS=Triticum aestivum OX=4565 PE=4 SV=1	0W_2	2	574.819	1.4056	0.014402	1	56.013	11095000
1633	AALVEYQVQK	10	A0A341TM85	Uncharacterized protein OS=Triticum aestivum OX=4565 PE=4 SV=1	2W_2	2	574.819	0.45233	0.026584	1	51.528	17670000
1634	AALVEYQVQK	10	A0A341TM85	Uncharacterized protein OS=Triticum aestivum OX=4565 PE=4 SV=1	0W_3	2	574.819	0.46812	0.0021319	1	80.755	12042000
1635	AALVEYQVQK	10	A0A341TM85	Uncharacterized protein OS=Triticum aestivum OX=4565 PE=4 SV=1	0W_1	2	574.819	0.31464	NaN	0		9968100
1636	AALVEYQVQK	10	A0A341TM85	Uncharacterized protein OS=Triticum aestivum OX=4565 PE=4 SV=1	2W_3	2	574.819	0.85831	NaN	0		16660000
1637	AALVGLYQDGSMLTFEGEK	19	A0A3B6REZ0	NTF2 domain-containing protein OS=Triticum aestivum OX=4565 PE=4 SV=1	2W_1	2	1015	1.7508	5.2944e-08	1	85.087	19955000
1638	AALVGLYQDGSMLTFEGEK	19	A0A3B6REZ0	NTF2 domain-containing protein OS=Triticum aestivum OX=4565 PE=4 SV=1	2W_2	2	1015	1.5213	7.2797e-09	1	88.565	15328000
1639	AALVGLYQDGSMLTFEGEK	19	A0A3B6REZ0	NTF2 domain-containing protein OS=Triticum aestivum OX=4565 PE=4 SV=1	2W_3	2	1015	1.826	2.857e-09	1	95.205	17660000
1640	AALVGLYQDGSMLTFEGEK	19	A0A3B6REZ0	NTF2 domain-containing protein OS=Triticum aestivum OX=4565 PE=4 SV=1	0W_1	2	1015	-1.2022	NaN	0		1571300
1641	AALVGLYQDGSMLTFEGEK	19	A0A3B6REZ0	NTF2 domain-containing protein OS=Triticum aestivum OX=4565 PE=4 SV=1	0W_2	2	1015	1.699	NaN	0		1254300
1642	AALVLSPFGK	10	A0A3B6N1J1	Putative B3 domain-containing protein(predicted) OS=Triticum aestivum OX=4565 PE=4 SV=1	2W_1	2	501.803	-0.10674	0.0026129	1	77.662	11821000
1643	AALVLSPFGK	10	A0A3B6N1J1	Putative B3 domain-containing protein(predicted) OS=Triticum aestivum OX=4565 PE=4 SV=1	2W_2	2	501.803	-0.56548	0.0026129	1	77.662	15095000
1644	AALVLSPFGK	10	A0A3B6N1J1	Putative B3 domain-containing protein(predicted) OS=Triticum aestivum OX=4565 PE=4 SV=1	2W_3	2	501.803	-0.31692	0.00095295	1	88.495	14244000
1645	AALVLSPFGK	10	A0A3B6N1J1	Putative B3 domain-containing protein(predicted) OS=Triticum aestivum OX=4565 PE=4 SV=1	0W_2	2	501.803	-0.3742	NaN	0		12590000
1646	AALVLSPFGK	10	A0A3B6N1J1	Putative B3 domain-containing protein(predicted) OS=Triticum aestivum OX=4565 PE=4 SV=1	0W_3	2	501.803	-0.48784	NaN	0		11147000
1647	AALVSLGLGDAVK	13	A0A3B6SJ31	Glucan endo-1,3-beta-glucosidase 13(predicted) OS=Triticum aestivum OX=4565 PE=3 SV=1	0W_1	2	607.361	0.59791	0.060254	1	34.444	2870900
1648	AALVSLGLGDAVK	13	A0A3B6SJ31	Glucan endo-1,3-beta-glucosidase 13(predicted) OS=Triticum aestivum OX=4565 PE=3 SV=1	0W_3	2	607.361	0.23575	0.025755	1	41.227	4671900
1649	AALVSLGLGDAVK	13	A0A3B6SJ31	Glucan endo-1,3-beta-glucosidase 13(predicted) OS=Triticum aestivum OX=4565 PE=3 SV=1	2W_1	2	607.361	0.30791	NaN	0		9180600
1650	AALVSLGLGDAVK	13	A0A3B6SJ31	Glucan endo-1,3-beta-glucosidase 13(predicted) OS=Triticum aestivum OX=4565 PE=3 SV=1	0W_2	2	607.361	-0.028355	NaN	0		3855800
1651	AALVSLGLGDAVK	13	A0A3B6SJ31	Glucan endo-1,3-beta-glucosidase 13(predicted) OS=Triticum aestivum OX=4565 PE=3 SV=1	2W_2	2	607.361	0.44066	NaN	0		9497200
1652	AALVSLGLGDAVK	13	A0A3B6SJ31	Glucan endo-1,3-beta-glucosidase 13(predicted) OS=Triticum aestivum OX=4565 PE=3 SV=1	2W_3	2	607.361	0.41822	NaN	0		12002000
1653	AAMLSVMEHGEK	12	A0A3B6IVW3	Nup133 nucleoporin family protein, expressed(predicted) OS=Triticum aestivum OX=4565 PE=4 SV=1	2W_2	3	434.878	0.068842	0.010055	1	39.016	3823300
1654	AAMLSVMEHGEK	12	A0A3B6IVW3	Nup133 nucleoporin family protein, expressed(predicted) OS=Triticum aestivum OX=4565 PE=4 SV=1	2W_3	3	434.878	1.4233	NaN	0		2391600
1655	AAMNSVEWNPK	11	A0A3B6KFT1	WD_REPEATS_REGION domain-containing protein OS=Triticum aestivum OX=4565 PE=4 SV=1	0W_1	2	631.795	-0.070418	0.0048951	1	53.567	6099000
1656	AAMNSVEWNPK	11	A0A3B6KFT1	WD_REPEATS_REGION domain-containing protein OS=Triticum aestivum OX=4565 PE=4 SV=1	0W_2	2	631.795	-0.65511	0.0017914	1	62.466	5279800
1657	AAMNSVEWNPK	11	A0A3B6KFT1	WD_REPEATS_REGION domain-containing protein OS=Triticum aestivum OX=4565 PE=4 SV=1	0W_3	2	631.795	-0.27969	0.00082939	1	71.221	5851300
1658	AAMNSVEWNPK	11	A0A3B6KFT1	WD_REPEATS_REGION domain-containing protein OS=Triticum aestivum OX=4565 PE=4 SV=1	2W_1	2	631.795	0.0018067	NaN	0		17336000
1659	AAMNSVEWNPK	11	A0A3B6KFT1	WD_REPEATS_REGION domain-containing protein OS=Triticum aestivum OX=4565 PE=4 SV=1	2W_2	2	631.795	-0.58521	NaN	0		6050200
1660	AAMNSVEWNPK	11	A0A3B6KFT1	WD_REPEATS_REGION domain-containing protein OS=Triticum aestivum OX=4565 PE=4 SV=1	2W_3	2	631.795	-0.14381	NaN	0		10121000
1661	AAMNSVEWNPK	11	A0A3B6KFT1	WD_REPEATS_REGION domain-containing protein OS=Triticum aestivum OX=4565 PE=4 SV=1	2W_1	2	623.798		0.010676	1	53.567	0
1662	AAMNSVEWNPK	11	A0A3B6KFT1	WD_REPEATS_REGION domain-containing protein OS=Triticum aestivum OX=4565 PE=4 SV=1	0W_3	2	623.798		0.023921	1	44.847	0
1663	AAMNSVEWNPK	11	A0A3B6KFT1	WD_REPEATS_REGION domain-containing protein OS=Triticum aestivum OX=4565 PE=4 SV=1	2W_3	2	623.798		0.009606	1	54.486	0
1664	AAMQFVVSPGK	11	A0A3B6RIB4	Lipase_GDSL domain-containing protein OS=Triticum aestivum OX=4565 PE=4 SV=1	0W_1	2	575.8	-0.41818	0.00056318	1	78.342	107460000
1665	AAMQFVVSPGK	11	A0A3B6RIB4	Lipase_GDSL domain-containing protein OS=Triticum aestivum OX=4565 PE=4 SV=1	2W_1	2	575.8	-0.81415	0.00093648	1	68.355	200240000
1666	AAMQFVVSPGK	11	A0A3B6RIB4	Lipase_GDSL domain-containing protein OS=Triticum aestivum OX=4565 PE=4 SV=1	0W_2	2	575.8	-0.28962	0.0094634	1	46.955	41105000
1667	AAMQFVVSPGK	11	A0A3B6RIB4	Lipase_GDSL domain-containing protein OS=Triticum aestivum OX=4565 PE=4 SV=1	0W_2	2	575.8	-0.41014	0.00056318	1	78.342	83506000
1668	AAMQFVVSPGK	11	A0A3B6RIB4	Lipase_GDSL domain-containing protein OS=Triticum aestivum OX=4565 PE=4 SV=1	2W_2	2	575.8	0.0083978	1.3762e-06	1	107.06	280360000
1669	AAMQFVVSPGK	11	A0A3B6RIB4	Lipase_GDSL domain-containing protein OS=Triticum aestivum OX=4565 PE=4 SV=1	0W_3	2	575.8	-0.49844	0.00056318	1	78.342	105030000
1670	AAMQFVVSPGK	11	A0A3B6RIB4	Lipase_GDSL domain-containing protein OS=Triticum aestivum OX=4565 PE=4 SV=1	2W_3	2	575.8	0.20439	0.00063842	1	76.332	224770000
1671	AAMQFVVSPGK	11	A0A3B6RIB4	Lipase_GDSL domain-containing protein OS=Triticum aestivum OX=4565 PE=4 SV=1	0W_1	2	575.8	-0.62589	NaN	0		52703000
1672	AAMQFVVSPGK	11	A0A3B6RIB4	Lipase_GDSL domain-containing protein OS=Triticum aestivum OX=4565 PE=4 SV=1	2W_1	2	575.8	-0.40693	NaN	0		118770000
1673	AAMQFVVSPGK	11	A0A3B6RIB4	Lipase_GDSL domain-containing protein OS=Triticum aestivum OX=4565 PE=4 SV=1	2W_2	2	575.8	0.07982	NaN	0		142080000
1674	AAMQFVVSPGK	11	A0A3B6RIB4	Lipase_GDSL domain-containing protein OS=Triticum aestivum OX=4565 PE=4 SV=1	0W_3	2	575.8	-0.71454	NaN	0		53237000
1675	AAMQFVVSPGK	11	A0A3B6RIB4	Lipase_GDSL domain-containing protein OS=Triticum aestivum OX=4565 PE=4 SV=1	2W_3	2	575.8	-0.34349	NaN	0		123990000
1676	AAMQFVVSPGK	11	A0A3B6RIB4	Lipase_GDSL domain-containing protein OS=Triticum aestivum OX=4565 PE=4 SV=1	0W_1	2	567.802	-0.44818	0.001616	1	77.062	486710000
1677	AAMQFVVSPGK	11	A0A3B6RIB4	Lipase_GDSL domain-containing protein OS=Triticum aestivum OX=4565 PE=4 SV=1	2W_1	2	567.802	-0.55249	0.00074516	1	85.813	716720000
1678	AAMQFVVSPGK	11	A0A3B6RIB4	Lipase_GDSL domain-containing protein OS=Triticum aestivum OX=4565 PE=4 SV=1	0W_2	2	567.802	-0.39437	0.0017389	1	75.819	452500000
1679	AAMQFVVSPGK	11	A0A3B6RIB4	Lipase_GDSL domain-containing protein OS=Triticum aestivum OX=4565 PE=4 SV=1	2W_2	2	567.802	-0.63092	3.6392e-06	1	107.06	727960000
1680	AAMQFVVSPGK	11	A0A3B6RIB4	Lipase_GDSL domain-containing protein OS=Triticum aestivum OX=4565 PE=4 SV=1	0W_3	2	567.802	-0.49049	0.00060855	1	87.184	488410000
1681	AAMQFVVSPGK	11	A0A3B6RIB4	Lipase_GDSL domain-containing protein OS=Triticum aestivum OX=4565 PE=4 SV=1	2W_3	2	567.802	-0.28586	0.00041609	1	89.9	716370000
1682	AAMSGAGGGATPQR	14	A0A3B6ED36	DNA-damage-repair/toleration protein DRT111, chloroplastic(predicted) OS=Triticum aestivum OX=4565 PE=4 SV=1	2W_1	2	616.296	-0.083047	0.016087	1	41.621	1857000
1683	AAMSGAGGGATPQR	14	A0A3B6ED36	DNA-damage-repair/toleration protein DRT111, chloroplastic(predicted) OS=Triticum aestivum OX=4565 PE=4 SV=1	2W_2	2	616.296	-0.35836	0.0028458	1	53.377	1868400
1684	AAMSGAGGGATPQR	14	A0A3B6ED36	DNA-damage-repair/toleration protein DRT111, chloroplastic(predicted) OS=Triticum aestivum OX=4565 PE=4 SV=1	2W_3	2	616.296	-0.60278	0.008398	1	44.968	1790200
1685	AAMSGAGGGATPQR	14	A0A3B6ED36	DNA-damage-repair/toleration protein DRT111, chloroplastic(predicted) OS=Triticum aestivum OX=4565 PE=4 SV=1	0W_1	2	616.296	-0.69564	NaN	0		1142300
1686	AAMSGAGGGATPQR	14	A0A3B6ED36	DNA-damage-repair/toleration protein DRT111, chloroplastic(predicted) OS=Triticum aestivum OX=4565 PE=4 SV=1	0W_2	2	616.296	-1.0282	NaN	0		1142800
1687	AAMSGAGGGATPQR	14	A0A3B6ED36	DNA-damage-repair/toleration protein DRT111, chloroplastic(predicted) OS=Triticum aestivum OX=4565 PE=4 SV=1	0W_3	2	616.296	-0.038958	NaN	0		1194200
1688	AANKAPDAFYALR	13	A0A3B5XVF6	Aminotran_1_2 domain-containing protein OS=Triticum aestivum OX=4565 PE=4 SV=1	0W_1	3	469.917	0.3859	6.1834e-05	1	82.774	10268000
1689	AANKAPDAFYALR	13	A0A3B5XVF6	Aminotran_1_2 domain-containing protein OS=Triticum aestivum OX=4565 PE=4 SV=1	2W_1	3	469.917	-0.21613	6.1834e-05	1	82.774	13137000
1690	AANKAPDAFYALR	13	A0A3B5XVF6	Aminotran_1_2 domain-containing protein OS=Triticum aestivum OX=4565 PE=4 SV=1	0W_2	3	469.917	-0.0386	4.4625e-05	1	89.43	9415100
1691	AANKAPDAFYALR	13	A0A3B5XVF6	Aminotran_1_2 domain-containing protein OS=Triticum aestivum OX=4565 PE=4 SV=1	2W_2	3	469.917	0.17825	5.4848e-09	1	116.13	10824000
1692	AANKAPDAFYALR	13	A0A3B5XVF6	Aminotran_1_2 domain-containing protein OS=Triticum aestivum OX=4565 PE=4 SV=1	0W_3	3	469.917	0.044652	6.5127e-05	1	81.377	10020000
1693	AANKAPDAFYALR	13	A0A3B5XVF6	Aminotran_1_2 domain-containing protein OS=Triticum aestivum OX=4565 PE=4 SV=1	2W_3	3	469.917	0.18952	5.8085e-05	1	84.365	14087000
1694	AANRFPTPLEVSDKDDVSVGR	21	A0A3B6MWX3	Semialdhyde_dh domain-containing protein OS=Triticum aestivum OX=4565 PE=3 SV=1	2W_3	3	758.389	0.27479	0.0012757	1	45.423	4248000
1695	AANRFPTPLEVSDKDDVSVGR	21	A0A3B6MWX3	Semialdhyde_dh domain-containing protein OS=Triticum aestivum OX=4565 PE=3 SV=1	2W_1	3	758.389	0.54108	NaN	0		3231600
1696	AANRFPTPLEVSDKDDVSVGR	21	A0A3B6MWX3	Semialdhyde_dh domain-containing protein OS=Triticum aestivum OX=4565 PE=3 SV=1	2W_2	3	758.389	0.44893	NaN	0		3940600
1697	AANSGSVDLTPAAR	14	A0A1D5UT08	SWIB domain-containing protein OS=Triticum aestivum OX=4565 GN=CAMPLR22A2D_LOCUS2802 PE=4 SV=1	2W_1	2	665.341	-2.6441	0.023487	1	38.399	25791000
1698	AANSGSVDLTPAAR	14	A0A1D5UT08	SWIB domain-containing protein OS=Triticum aestivum OX=4565 GN=CAMPLR22A2D_LOCUS2802 PE=4 SV=1	0W_3	2	665.341	-3.1315	0.0021864	1	54.898	29068000
1699	AANSGSVDLTPAAR	14	A0A1D5UT08	SWIB domain-containing protein OS=Triticum aestivum OX=4565 GN=CAMPLR22A2D_LOCUS2802 PE=4 SV=1	2W_3	2	665.341	-2.4469	0.0021864	1	54.898	27302000
1700	AANSGSVDLTPAAR	14	A0A1D5UT08	SWIB domain-containing protein OS=Triticum aestivum OX=4565 GN=CAMPLR22A2D_LOCUS2802 PE=4 SV=1	0W_1	2	665.341	-2.3892	NaN	0		28559000
1701	AANSGSVDLTPAAR	14	A0A1D5UT08	SWIB domain-containing protein OS=Triticum aestivum OX=4565 GN=CAMPLR22A2D_LOCUS2802 PE=4 SV=1	0W_2	2	665.341	-1.0043	NaN	0		22223000
1702	AANSGSVDLTPAAR	14	A0A1D5UT08	SWIB domain-containing protein OS=Triticum aestivum OX=4565 GN=CAMPLR22A2D_LOCUS2802 PE=4 SV=1	2W_2	2	665.341	-2.1602	NaN	0		27592000
1703	AANTNDTEGIALHQLAK	17	A0A3B6QJ37	TPR_REGION domain-containing protein OS=Triticum aestivum OX=4565 PE=4 SV=1	2W_1	3	589.639	0.71182	0.0012933	1	40.242	7974800
1704	AANTNDTEGIALHQLAK	17	A0A3B6QJ37	TPR_REGION domain-containing protein OS=Triticum aestivum OX=4565 PE=4 SV=1	2W_2	3	589.639	0.34324	0.0010362	1	41.695	8525100
1705	AANTNDTEGIALHQLAK	17	A0A3B6QJ37	TPR_REGION domain-containing protein OS=Triticum aestivum OX=4565 PE=4 SV=1	2W_3	3	589.639	0.046421	7.4109e-05	1	54.812	7752500
1706	AANTNDTEGIALHQLAK	17	A0A3B6QJ37	TPR_REGION domain-containing protein OS=Triticum aestivum OX=4565 PE=4 SV=1	0W_1	3	589.639	0.03289	NaN	0		5617700
1707	AANTNDTEGIALHQLAK	17	A0A3B6QJ37	TPR_REGION domain-containing protein OS=Triticum aestivum OX=4565 PE=4 SV=1	0W_2	3	589.639	0.57779	NaN	0		4734100
1708	AANTNDTEGIALHQLAK	17	A0A3B6QJ37	TPR_REGION domain-containing protein OS=Triticum aestivum OX=4565 PE=4 SV=1	0W_3	3	589.639	0.32397	NaN	0		3530900
1709	AANVGDPDALFLALK	15	A0A3B6NLG3	DNA polymerase V(predicted) OS=Triticum aestivum OX=4565 PE=4 SV=1	2W_1	2	757.914	0.49326	0.0033697	1	47.037	147470000
1710	AANVGDPDALFLALK	15	A0A3B6NLG3	DNA polymerase V(predicted) OS=Triticum aestivum OX=4565 PE=4 SV=1	2W_2	2	757.914	0.61667	0.044697	1	33.265	154510000
1711	AANVGDPDALFLALK	15	A0A3B6NLG3	DNA polymerase V(predicted) OS=Triticum aestivum OX=4565 PE=4 SV=1	2W_3	2	757.914	0.56057	0.0013727	1	54.402	108620000
1712	AANVLAAANTAAEVAMR	17	A0A3B5ZWI7	Peptidase_M24 domain-containing protein OS=Triticum aestivum OX=4565 PE=4 SV=1	0W_1	3	553.954	-1.2698	0.00016398	1	50.827	7119400
1713	AANVLAAANTAAEVAMR	17	A0A3B5ZWI7	Peptidase_M24 domain-containing protein OS=Triticum aestivum OX=4565 PE=4 SV=1	2W_1	3	553.954	-0.49412	6.3525e-07	1	77.324	19675000
1714	AANVLAAANTAAEVAMR	17	A0A3B5ZWI7	Peptidase_M24 domain-containing protein OS=Triticum aestivum OX=4565 PE=4 SV=1	0W_2	3	553.954	-0.4913	0.0011327	1	41.088	9175600
1715	AANVLAAANTAAEVAMR	17	A0A3B5ZWI7	Peptidase_M24 domain-containing protein OS=Triticum aestivum OX=4565 PE=4 SV=1	0W_2	2	830.428	-0.51803	0.0021331	1	41.386	5482700
1716	AANVLAAANTAAEVAMR	17	A0A3B5ZWI7	Peptidase_M24 domain-containing protein OS=Triticum aestivum OX=4565 PE=4 SV=1	0W_2	3	553.954	-1.0618	0.00021168	1	48.729	8541900
1717	AANVLAAANTAAEVAMR	17	A0A3B5ZWI7	Peptidase_M24 domain-containing protein OS=Triticum aestivum OX=4565 PE=4 SV=1	0W_2	2	830.428	0.88093	2.6051e-06	1	75.018	6106200
1718	AANVLAAANTAAEVAMR	17	A0A3B5ZWI7	Peptidase_M24 domain-containing protein OS=Triticum aestivum OX=4565 PE=4 SV=1	2W_2	2	830.428	-0.03235	0.00033563	1	49.425	9847500
1719	AANVLAAANTAAEVAMR	17	A0A3B5ZWI7	Peptidase_M24 domain-containing protein OS=Triticum aestivum OX=4565 PE=4 SV=1	2W_2	2	830.428	1.2504	0.0022362	1	41.088	5418700
1720	AANVLAAANTAAEVAMR	17	A0A3B5ZWI7	Peptidase_M24 domain-containing protein OS=Triticum aestivum OX=4565 PE=4 SV=1	0W_3	3	553.954	-0.30667	1.8304e-06	1	73.296	7564300
1721	AANVLAAANTAAEVAMR	17	A0A3B5ZWI7	Peptidase_M24 domain-containing protein OS=Triticum aestivum OX=4565 PE=4 SV=1	0W_3	2	830.428	-0.838	6.3781e-06	1	68.576	6140000
1722	AANVLAAANTAAEVAMR	17	A0A3B5ZWI7	Peptidase_M24 domain-containing protein OS=Triticum aestivum OX=4565 PE=4 SV=1	0W_3	2	830.428	0.90368	0.00023242	1	52.862	5380600
1723	AANVLAAANTAAEVAMR	17	A0A3B5ZWI7	Peptidase_M24 domain-containing protein OS=Triticum aestivum OX=4565 PE=4 SV=1	2W_3	3	553.954	-0.64858	1.6709e-06	1	73.833	15968000
1724	AANVLAAANTAAEVAMR	17	A0A3B5ZWI7	Peptidase_M24 domain-containing protein OS=Triticum aestivum OX=4565 PE=4 SV=1	0W_1	2	830.428	0.19864	NaN	0		4577000
1725	AANVLAAANTAAEVAMR	17	A0A3B5ZWI7	Peptidase_M24 domain-containing protein OS=Triticum aestivum OX=4565 PE=4 SV=1	2W_1	2	830.428	0.057751	NaN	0		10683000
1726	AANVLAAANTAAEVAMR	17	A0A3B5ZWI7	Peptidase_M24 domain-containing protein OS=Triticum aestivum OX=4565 PE=4 SV=1	2W_1	2	830.428	0.2211	NaN	0		3318000
1727	AANVLAAANTAAEVAMR	17	A0A3B5ZWI7	Peptidase_M24 domain-containing protein OS=Triticum aestivum OX=4565 PE=4 SV=1	2W_1	3	553.954	-1.8477	NaN	0		7576400
1728	AANVLAAANTAAEVAMR	17	A0A3B5ZWI7	Peptidase_M24 domain-containing protein OS=Triticum aestivum OX=4565 PE=4 SV=1	2W_2	3	553.954	-1.6611	NaN	0		6441300
1729	AANVLAAANTAAEVAMR	17	A0A3B5ZWI7	Peptidase_M24 domain-containing protein OS=Triticum aestivum OX=4565 PE=4 SV=1	0W_3	3	553.954	-1.0828	NaN	0		6821300
1730	AANVLAAANTAAEVAMR	17	A0A3B5ZWI7	Peptidase_M24 domain-containing protein OS=Triticum aestivum OX=4565 PE=4 SV=1	2W_3	2	830.428	1.3106	NaN	0		5371500
1731	AANVLAAANTAAEVAMR	17	A0A3B5ZWI7	Peptidase_M24 domain-containing protein OS=Triticum aestivum OX=4565 PE=4 SV=1	2W_3	3	553.954	-2.8033	NaN	0		10742000
1732	AANVLAAANTAAEVAMR	17	A0A3B5ZWI7	Peptidase_M24 domain-containing protein OS=Triticum aestivum OX=4565 PE=4 SV=1	0W_1	3	548.623	-0.2218	5.7005e-11	1	110.35	9481100
1733	AANVLAAANTAAEVAMR	17	A0A3B5ZWI7	Peptidase_M24 domain-containing protein OS=Triticum aestivum OX=4565 PE=4 SV=1	2W_1	3	548.623	-0.65983	0.031921	1	22.368	5094900
1734	AANVLAAANTAAEVAMR	17	A0A3B5ZWI7	Peptidase_M24 domain-containing protein OS=Triticum aestivum OX=4565 PE=4 SV=1	0W_2	3	548.623	-0.3486	2.4297e-06	1	71.354	6123300
1735	AANVLAAANTAAEVAMR	17	A0A3B5ZWI7	Peptidase_M24 domain-containing protein OS=Triticum aestivum OX=4565 PE=4 SV=1	0W_3	3	548.623	-0.57894	8.3345e-31	1	147.12	6783100
1736	AANVLAAANTAAEVAMR	17	A0A3B5ZWI7	Peptidase_M24 domain-containing protein OS=Triticum aestivum OX=4565 PE=4 SV=1	2W_3	3	548.623	-1.1942	3.5404e-06	1	67.646	6555400
1737	AANVLAAANTAAEVAMR	17	A0A3B5ZWI7	Peptidase_M24 domain-containing protein OS=Triticum aestivum OX=4565 PE=4 SV=1	2W_2	3	548.623	-1.3131	NaN	0		6832400
1738	AANVMVDCAWDYINR	15	A0A3B6D6T0	Acyl-CoA dehydrogenase family member 10(predicted) OS=Triticum aestivum OX=4565 PE=4 SV=1	0W_1	2	899.406	0.37436	0.00014873	1	89.624	21227000
1739	AANVMVDCAWDYINR	15	A0A3B6D6T0	Acyl-CoA dehydrogenase family member 10(predicted) OS=Triticum aestivum OX=4565 PE=4 SV=1	2W_1	2	899.406	-0.2619	1.1909e-19	1	136.6	30792000
1740	AANVMVDCAWDYINR	15	A0A3B6D6T0	Acyl-CoA dehydrogenase family member 10(predicted) OS=Triticum aestivum OX=4565 PE=4 SV=1	0W_2	2	899.406	-0.32633	NaN	0		20517000
1741	AANVMVDCAWDYINR	15	A0A3B6D6T0	Acyl-CoA dehydrogenase family member 10(predicted) OS=Triticum aestivum OX=4565 PE=4 SV=1	2W_2	2	899.406	-0.32332	NaN	0		24990000
1742	AANVMVDCAWDYINR	15	A0A3B6D6T0	Acyl-CoA dehydrogenase family member 10(predicted) OS=Triticum aestivum OX=4565 PE=4 SV=1	0W_3	2	899.406	0.19939	NaN	0		18256000
1743	AANVMVDCAWDYINR	15	A0A3B6D6T0	Acyl-CoA dehydrogenase family member 10(predicted) OS=Triticum aestivum OX=4565 PE=4 SV=1	2W_3	2	899.406	-0.16884	NaN	0		31238000
1744	AANVMVDCAWDYINR	15	A0A3B6D6T0	Acyl-CoA dehydrogenase family member 10(predicted) OS=Triticum aestivum OX=4565 PE=4 SV=1	2W_1	2	907.403	-1.2375	9.9957e-05	1	66.246	6125900
1745	AANVMVDCAWDYINR	15	A0A3B6D6T0	Acyl-CoA dehydrogenase family member 10(predicted) OS=Triticum aestivum OX=4565 PE=4 SV=1	2W_2	2	907.403	-1.1375	0.00024658	1	58.885	5779400
1746	AANVMVDCAWDYINR	15	A0A3B6D6T0	Acyl-CoA dehydrogenase family member 10(predicted) OS=Triticum aestivum OX=4565 PE=4 SV=1	2W_3	2	907.403	-0.84124	0.0024292	1	44.252	5999800
1747	AANVMVDCAWDYINR	15	A0A3B6D6T0	Acyl-CoA dehydrogenase family member 10(predicted) OS=Triticum aestivum OX=4565 PE=4 SV=1	0W_1	2	907.403	1.2672	NaN	0		3117700
1748	AANYGGVMLWDR	12	A0A3B6LPM5	Glyco_hydro_18 domain-containing protein OS=Triticum aestivum OX=4565 PE=4 SV=1	0W_1	2	676.824	0.15377	0.00058546	1	78.324	50558000
1749	AANYGGVMLWDR	12	A0A3B6LPM5	Glyco_hydro_18 domain-containing protein OS=Triticum aestivum OX=4565 PE=4 SV=1	2W_1	2	676.824	0.12213	0.00058546	1	78.324	47040000
1750	AANYGGVMLWDR	12	A0A3B6LPM5	Glyco_hydro_18 domain-containing protein OS=Triticum aestivum OX=4565 PE=4 SV=1	0W_2	2	676.824	0.075444	0.0061237	1	54.343	60875000
1751	AANYGGVMLWDR	12	A0A3B6LPM5	Glyco_hydro_18 domain-containing protein OS=Triticum aestivum OX=4565 PE=4 SV=1	2W_2	2	676.824	-0.089665	0.00093228	1	67.997	53178000
1752	AANYGGVMLWDR	12	A0A3B6LPM5	Glyco_hydro_18 domain-containing protein OS=Triticum aestivum OX=4565 PE=4 SV=1	2W_3	2	676.824	0.10454	7.2917e-05	1	95.417	62931000
1753	AANYGGVMLWDR	12	A0A3B6LPM5	Glyco_hydro_18 domain-containing protein OS=Triticum aestivum OX=4565 PE=4 SV=1	0W_3	2	676.824	0.10649	NaN	0		48961000
1754	AANYGGVMLWDR	12	A0A3B6LPM5	Glyco_hydro_18 domain-containing protein OS=Triticum aestivum OX=4565 PE=4 SV=1	2W_2	2	684.822	-1.3176	0.00093629	1	61.11	25052000
1755	AANYGGVMLWDR	12	A0A3B6LPM5	Glyco_hydro_18 domain-containing protein OS=Triticum aestivum OX=4565 PE=4 SV=1	2W_3	2	684.822	-1.5607	0.0043628	1	49.483	26704000
1756	AANYGGVMLWDR	12	A0A3B6LPM5	Glyco_hydro_18 domain-containing protein OS=Triticum aestivum OX=4565 PE=4 SV=1	0W_1	2	684.822	-0.84632	NaN	0		11373000
1757	AANYGGVMLWDR	12	A0A3B6LPM5	Glyco_hydro_18 domain-containing protein OS=Triticum aestivum OX=4565 PE=4 SV=1	2W_1	2	684.822	-0.76906	NaN	0		23046000
1758	AANYGGVMLWDR	12	A0A3B6LPM5	Glyco_hydro_18 domain-containing protein OS=Triticum aestivum OX=4565 PE=4 SV=1	2W_3	2	684.822	-4.6362	NaN	0		1375900
1759	AAPAAAAYPAVTR	13	A0A3B6D4A1	Pyruvate dehydrogenase E1 component subunit alpha OS=Triticum aestivum OX=4565 PE=4 SV=1	0W_1	2	615.335		0.004437	1	62.088	0
1760	AAPAAAAYPAVTR	13	A0A3B6D4A1	Pyruvate dehydrogenase E1 component subunit alpha OS=Triticum aestivum OX=4565 PE=4 SV=1	2W_1	2	615.335	-0.2725	0.00021707	1	76.073	13412000
1761	AAPAAAAYPAVTR	13	A0A3B6D4A1	Pyruvate dehydrogenase E1 component subunit alpha OS=Triticum aestivum OX=4565 PE=4 SV=1	0W_2	2	615.335		0.00077518	1	69.03	0
1762	AAPAAAAYPAVTR	13	A0A3B6D4A1	Pyruvate dehydrogenase E1 component subunit alpha OS=Triticum aestivum OX=4565 PE=4 SV=1	2W_2	2	615.335	-0.082143	0.00026913	1	73.927	14123000
1763	AAPAAAAYPAVTR	13	A0A3B6D4A1	Pyruvate dehydrogenase E1 component subunit alpha OS=Triticum aestivum OX=4565 PE=4 SV=1	0W_3	2	615.335	0.12434	0.00057682	1	66.393	7971500
1764	AAPAAAAYPAVTR	13	A0A3B6D4A1	Pyruvate dehydrogenase E1 component subunit alpha OS=Triticum aestivum OX=4565 PE=4 SV=1	2W_3	2	615.335	-0.051244	0.00016652	1	79.089	11748000
1765	AAPAAAAYPAVTR	13	A0A3B6D4A1	Pyruvate dehydrogenase E1 component subunit alpha OS=Triticum aestivum OX=4565 PE=4 SV=1	2W_3	2	615.335	4.6611	NaN	0		2872400
1766	AAPAAGGAAVAPAPSVK	17	A0A3B6SHI4	Aha1_N domain-containing protein OS=Triticum aestivum OX=4565 PE=4 SV=1	0W_1	2	703.394	-0.43622	3.7234e-05	1	65.949	12760000
1767	AAPAAGGAAVAPAPSVK	17	A0A3B6SHI4	Aha1_N domain-containing protein OS=Triticum aestivum OX=4565 PE=4 SV=1	2W_1	2	703.394	-0.35491	0.012155	1	38.777	9908800
1768	AAPAAGGAAVAPAPSVK	17	A0A3B6SHI4	Aha1_N domain-containing protein OS=Triticum aestivum OX=4565 PE=4 SV=1	0W_2	2	703.394	-0.52268	2.488e-05	1	66.826	10204000
1769	AAPAAGGAAVAPAPSVK	17	A0A3B6SHI4	Aha1_N domain-containing protein OS=Triticum aestivum OX=4565 PE=4 SV=1	2W_2	2	703.394	-0.28596	2.8393e-05	1	66.577	11711000
1770	AAPAAGGAAVAPAPSVK	17	A0A3B6SHI4	Aha1_N domain-containing protein OS=Triticum aestivum OX=4565 PE=4 SV=1	0W_3	2	703.394	0.3321	6.9047e-05	1	63.691	11781000
1771	AAPAAGGAAVAPAPSVK	17	A0A3B6SHI4	Aha1_N domain-containing protein OS=Triticum aestivum OX=4565 PE=4 SV=1	2W_3	2	703.394	0.15345	1.2051e-05	1	71.685	12350000
1772	AAPAHPTYAEMVAEAIAALK	20	A0A3B6KRY8	H15 domain-containing protein OS=Triticum aestivum OX=4565 PE=3 SV=1	0W_1	3	681.019	0.038383	0.00029014	1	49.036	54718000
1773	AAPAHPTYAEMVAEAIAALK	20	A0A3B6KRY8	H15 domain-containing protein OS=Triticum aestivum OX=4565 PE=3 SV=1	0W_1	3	681.019	0.16075	0.00030895	1	46.494	35383000
1774	AAPAHPTYAEMVAEAIAALK	20	A0A3B6KRY8	H15 domain-containing protein OS=Triticum aestivum OX=4565 PE=3 SV=1	0W_1	3	681.019	-0.24188	0.00026683	1	52.185	249560000
1775	AAPAHPTYAEMVAEAIAALK	20	A0A3B6KRY8	H15 domain-containing protein OS=Triticum aestivum OX=4565 PE=3 SV=1	2W_1	3	681.019	-0.14537	0.00029502	1	48.376	153710000
1776	AAPAHPTYAEMVAEAIAALK	20	A0A3B6KRY8	H15 domain-containing protein OS=Triticum aestivum OX=4565 PE=3 SV=1	2W_1	2	1021.02	-0.14586	2.727e-05	1	69.188	11741000
1777	AAPAHPTYAEMVAEAIAALK	20	A0A3B6KRY8	H15 domain-containing protein OS=Triticum aestivum OX=4565 PE=3 SV=1	0W_2	3	681.019	0.39258	0.00014936	1	60.764	41672000
1778	AAPAHPTYAEMVAEAIAALK	20	A0A3B6KRY8	H15 domain-containing protein OS=Triticum aestivum OX=4565 PE=3 SV=1	0W_2	3	681.019	0.011835	0.00025745	1	53.453	255450000
1779	AAPAHPTYAEMVAEAIAALK	20	A0A3B6KRY8	H15 domain-containing protein OS=Triticum aestivum OX=4565 PE=3 SV=1	2W_2	3	681.019	-0.29114	0.000369	1	44.788	45673000
1780	AAPAHPTYAEMVAEAIAALK	20	A0A3B6KRY8	H15 domain-containing protein OS=Triticum aestivum OX=4565 PE=3 SV=1	2W_2	3	681.019	-0.24973	0.00011208	1	62.589	147300000
1781	AAPAHPTYAEMVAEAIAALK	20	A0A3B6KRY8	H15 domain-containing protein OS=Triticum aestivum OX=4565 PE=3 SV=1	2W_2	2	1021.02	-0.20353	0.0002815	1	61.096	13253000
1782	AAPAHPTYAEMVAEAIAALK	20	A0A3B6KRY8	H15 domain-containing protein OS=Triticum aestivum OX=4565 PE=3 SV=1	0W_3	3	681.019	0.30611	0.00025745	1	53.453	56342000
1783	AAPAHPTYAEMVAEAIAALK	20	A0A3B6KRY8	H15 domain-containing protein OS=Triticum aestivum OX=4565 PE=3 SV=1	0W_3	3	681.019	-0.19608	0.00011208	1	62.589	225420000
1784	AAPAHPTYAEMVAEAIAALK	20	A0A3B6KRY8	H15 domain-containing protein OS=Triticum aestivum OX=4565 PE=3 SV=1	2W_3	3	681.019	-0.29978	0.0001778	1	59.372	47716000
1785	AAPAHPTYAEMVAEAIAALK	20	A0A3B6KRY8	H15 domain-containing protein OS=Triticum aestivum OX=4565 PE=3 SV=1	2W_3	2	1021.02	-0.33423	2.4934e-05	1	69.935	13499000
1786	AAPAHPTYAEMVAEAIAALK	20	A0A3B6KRY8	H15 domain-containing protein OS=Triticum aestivum OX=4565 PE=3 SV=1	2W_3	3	681.019	-0.27383	0.0001637	1	60.062	160800000
1787	AAPAHPTYAEMVAEAIAALK	20	A0A3B6KRY8	H15 domain-containing protein OS=Triticum aestivum OX=4565 PE=3 SV=1	0W_1	2	1021.02	-0.22695	NaN	0		2012300
1788	AAPAHPTYAEMVAEAIAALK	20	A0A3B6KRY8	H15 domain-containing protein OS=Triticum aestivum OX=4565 PE=3 SV=1	2W_1	2	1021.02	0.39825	NaN	0		2334600
1789	AAPAHPTYAEMVAEAIAALK	20	A0A3B6KRY8	H15 domain-containing protein OS=Triticum aestivum OX=4565 PE=3 SV=1	0W_2	2	1021.02	-0.020991	NaN	0		3208400
1790	AAPAHPTYAEMVAEAIAALK	20	A0A3B6KRY8	H15 domain-containing protein OS=Triticum aestivum OX=4565 PE=3 SV=1	0W_2	2	1021.02	0.15751	NaN	0		2419100
1791	AAPAHPTYAEMVAEAIAALK	20	A0A3B6KRY8	H15 domain-containing protein OS=Triticum aestivum OX=4565 PE=3 SV=1	0W_2	2	1021.02	-0.013389	NaN	0		12075000
1792	AAPAHPTYAEMVAEAIAALK	20	A0A3B6KRY8	H15 domain-containing protein OS=Triticum aestivum OX=4565 PE=3 SV=1	0W_1	3	675.687	-0.2443	3.9687e-05	2	66.152	1133700000
1793	AAPAHPTYAEMVAEAIAALK	20	A0A3B6KRY8	H15 domain-containing protein OS=Triticum aestivum OX=4565 PE=3 SV=1	0W_1	2	1013.03	0.0092295	0.00040536	1	64.275	58515000
1794	AAPAHPTYAEMVAEAIAALK	20	A0A3B6KRY8	H15 domain-containing protein OS=Triticum aestivum OX=4565 PE=3 SV=1	0W_1	4	507.017	0.51183	0.0011345	1	34.174	20369000
1795	AAPAHPTYAEMVAEAIAALK	20	A0A3B6KRY8	H15 domain-containing protein OS=Triticum aestivum OX=4565 PE=3 SV=1	2W_1	3	675.687	1.139	0.012186	1	23.658	3625200
1796	AAPAHPTYAEMVAEAIAALK	20	A0A3B6KRY8	H15 domain-containing protein OS=Triticum aestivum OX=4565 PE=3 SV=1	2W_1	3	675.687	0.0051812	9.1105e-06	2	72.21	1221000000
1797	AAPAHPTYAEMVAEAIAALK	20	A0A3B6KRY8	H15 domain-containing protein OS=Triticum aestivum OX=4565 PE=3 SV=1	2W_1	2	1013.03	0.29071	5.3812e-11	1	101.92	80728000
1798	AAPAHPTYAEMVAEAIAALK	20	A0A3B6KRY8	H15 domain-containing protein OS=Triticum aestivum OX=4565 PE=3 SV=1	2W_1	4	507.017	0.35007	0.00020719	1	51.971	17386000
1799	AAPAHPTYAEMVAEAIAALK	20	A0A3B6KRY8	H15 domain-containing protein OS=Triticum aestivum OX=4565 PE=3 SV=1	0W_2	3	675.687	-0.12805	0.035966	1	18.936	3160000
1800	AAPAHPTYAEMVAEAIAALK	20	A0A3B6KRY8	H15 domain-containing protein OS=Triticum aestivum OX=4565 PE=3 SV=1	0W_2	3	675.687	-0.34905	0.0001508	2	60.764	959050000
1801	AAPAHPTYAEMVAEAIAALK	20	A0A3B6KRY8	H15 domain-containing protein OS=Triticum aestivum OX=4565 PE=3 SV=1	0W_2	4	507.017	0.58825	0.01329	1	22.626	18429000
1802	AAPAHPTYAEMVAEAIAALK	20	A0A3B6KRY8	H15 domain-containing protein OS=Triticum aestivum OX=4565 PE=3 SV=1	0W_2	3	675.687	-0.28735	0.03105	1	19.912	3393800
1803	AAPAHPTYAEMVAEAIAALK	20	A0A3B6KRY8	H15 domain-containing protein OS=Triticum aestivum OX=4565 PE=3 SV=1	2W_2	3	675.687	-0.51388	3.9687e-05	2	66.152	1166300000
1804	AAPAHPTYAEMVAEAIAALK	20	A0A3B6KRY8	H15 domain-containing protein OS=Triticum aestivum OX=4565 PE=3 SV=1	2W_2	2	1013.03	-0.022385	1.4919e-07	1	80.596	95185000
1805	AAPAHPTYAEMVAEAIAALK	20	A0A3B6KRY8	H15 domain-containing protein OS=Triticum aestivum OX=4565 PE=3 SV=1	2W_2	4	507.017	0.068969	0.00023847	1	46.494	15852000
1806	AAPAHPTYAEMVAEAIAALK	20	A0A3B6KRY8	H15 domain-containing protein OS=Triticum aestivum OX=4565 PE=3 SV=1	0W_3	3	675.687	-0.34905	0.057688	1	14.623	2693300
1807	AAPAHPTYAEMVAEAIAALK	20	A0A3B6KRY8	H15 domain-containing protein OS=Triticum aestivum OX=4565 PE=3 SV=1	0W_3	3	675.687	-0.25449	0.0001795	2	59.372	1104400000
1808	AAPAHPTYAEMVAEAIAALK	20	A0A3B6KRY8	H15 domain-containing protein OS=Triticum aestivum OX=4565 PE=3 SV=1	0W_3	4	507.017	0.58485	0.00053564	1	37.85	16856000
1809	AAPAHPTYAEMVAEAIAALK	20	A0A3B6KRY8	H15 domain-containing protein OS=Triticum aestivum OX=4565 PE=3 SV=1	2W_3	3	675.687	1.3824	0.0040462	1	29.603	3228400
1810	AAPAHPTYAEMVAEAIAALK	20	A0A3B6KRY8	H15 domain-containing protein OS=Triticum aestivum OX=4565 PE=3 SV=1	2W_3	3	675.687	-0.19349	3.5668e-06	2	75.674	1085400000
1811	AAPAHPTYAEMVAEAIAALK	20	A0A3B6KRY8	H15 domain-containing protein OS=Triticum aestivum OX=4565 PE=3 SV=1	2W_3	2	1013.03	0.15273	9.2653e-10	1	94.973	78611000
1812	AAPAHPTYAEMVAEAIAALK	20	A0A3B6KRY8	H15 domain-containing protein OS=Triticum aestivum OX=4565 PE=3 SV=1	2W_3	4	507.017	0.1531	0.00020719	1	51.971	18732000
1813	AAPAHPTYAEMVAEAIAALK	20	A0A3B6KRY8	H15 domain-containing protein OS=Triticum aestivum OX=4565 PE=3 SV=1	0W_1	3	675.687	-0.42888	NaN	0		4345900
1814	AAPAHPTYAEMVAEAIAALK	20	A0A3B6KRY8	H15 domain-containing protein OS=Triticum aestivum OX=4565 PE=3 SV=1	0W_1	3	675.687	-0.45074	NaN	0		1121100
1815	AAPAHPTYAEMVAEAIAALK	20	A0A3B6KRY8	H15 domain-containing protein OS=Triticum aestivum OX=4565 PE=3 SV=1	0W_2	2	1013.03	0.095077	NaN	0		37268000
1816	AAPAHPTYAEMVAEAIAALK	20	A0A3B6KRY8	H15 domain-containing protein OS=Triticum aestivum OX=4565 PE=3 SV=1	2W_2	3	675.687	0.49095	NaN	0		3233300
1817	AAPAHPTYAEMVAEAIAALK	20	A0A3B6KRY8	H15 domain-containing protein OS=Triticum aestivum OX=4565 PE=3 SV=1	2W_2	3	675.687	-0.21143	NaN	0		689090
1818	AAPAHPTYAEMVAEAIAALK	20	A0A3B6KRY8	H15 domain-containing protein OS=Triticum aestivum OX=4565 PE=3 SV=1	2W_2	3	675.687	-1.5174	NaN	0		2464300
1819	AAPAHPTYAEMVAEAIAALK	20	A0A3B6KRY8	H15 domain-containing protein OS=Triticum aestivum OX=4565 PE=3 SV=1	0W_3	2	1013.03	-0.0037948	NaN	0		49704000
1820	AAPAHPTYAEMVAEAIAALK	20	A0A3B6KRY8	H15 domain-containing protein OS=Triticum aestivum OX=4565 PE=3 SV=1	0W_3	3	675.687	-0.48217	NaN	0		731410
1821	AAPAHPTYAEMVSEAITALK	20	A0A3B6KR72	H15 domain-containing protein OS=Triticum aestivum OX=4565 PE=3 SV=1	0W_1	2	1044.03	0.45069	0.00047928	1	55.437	12923000
1822	AAPAHPTYAEMVSEAITALK	20	A0A3B6KR72	H15 domain-containing protein OS=Triticum aestivum OX=4565 PE=3 SV=1	0W_1	3	696.354	0.44183	0.000369	1	44.788	199310000
1823	AAPAHPTYAEMVSEAITALK	20	A0A3B6KR72	H15 domain-containing protein OS=Triticum aestivum OX=4565 PE=3 SV=1	0W_1	3	696.354	0.78949	0.00027592	1	50.957	507870000
1824	AAPAHPTYAEMVSEAITALK	20	A0A3B6KR72	H15 domain-containing protein OS=Triticum aestivum OX=4565 PE=3 SV=1	2W_1	3	696.354	0.061039	0.00028472	1	49.768	96766000
1825	AAPAHPTYAEMVSEAITALK	20	A0A3B6KR72	H15 domain-containing protein OS=Triticum aestivum OX=4565 PE=3 SV=1	2W_1	3	696.354	0.14998	0.00025671	1	53.554	80023000
1826	AAPAHPTYAEMVSEAITALK	20	A0A3B6KR72	H15 domain-containing protein OS=Triticum aestivum OX=4565 PE=3 SV=1	0W_2	3	696.354	0.14155	0.00027592	1	50.957	184560000
1827	AAPAHPTYAEMVSEAITALK	20	A0A3B6KR72	H15 domain-containing protein OS=Triticum aestivum OX=4565 PE=3 SV=1	0W_2	3	696.354	0.96764	0.00054866	1	40.952	425970000
1828	AAPAHPTYAEMVSEAITALK	20	A0A3B6KR72	H15 domain-containing protein OS=Triticum aestivum OX=4565 PE=3 SV=1	2W_2	3	696.354	0.080118	0.00026179	1	52.866	84531000
1829	AAPAHPTYAEMVSEAITALK	20	A0A3B6KR72	H15 domain-containing protein OS=Triticum aestivum OX=4565 PE=3 SV=1	2W_2	3	696.354	-0.051735	0.00027172	1	51.524	86644000
1830	AAPAHPTYAEMVSEAITALK	20	A0A3B6KR72	H15 domain-containing protein OS=Triticum aestivum OX=4565 PE=3 SV=1	0W_3	3	696.354	0.3805	0.00021877	1	57.366	198930000
1831	AAPAHPTYAEMVSEAITALK	20	A0A3B6KR72	H15 domain-containing protein OS=Triticum aestivum OX=4565 PE=3 SV=1	0W_3	3	696.354	0.95728	0.00054866	1	40.952	260100000
1832	AAPAHPTYAEMVSEAITALK	20	A0A3B6KR72	H15 domain-containing protein OS=Triticum aestivum OX=4565 PE=3 SV=1	2W_3	3	696.354	0.051638	0.00030919	1	46.461	80490000
1833	AAPAHPTYAEMVSEAITALK	20	A0A3B6KR72	H15 domain-containing protein OS=Triticum aestivum OX=4565 PE=3 SV=1	2W_3	3	696.354	0.15552	0.00027172	1	51.524	93849000
1834	AAPAHPTYAEMVSEAITALK	20	A0A3B6KR72	H15 domain-containing protein OS=Triticum aestivum OX=4565 PE=3 SV=1	0W_2	2	1044.03	0.39221	NaN	0		12615000
1835	AAPAHPTYAEMVSEAITALK	20	A0A3B6KR72	H15 domain-containing protein OS=Triticum aestivum OX=4565 PE=3 SV=1	2W_2	2	1044.03	2.2964	NaN	0		9553500
1836	AAPAHPTYAEMVSEAITALK	20	A0A3B6KR72	H15 domain-containing protein OS=Triticum aestivum OX=4565 PE=3 SV=1	0W_3	3	696.354	-0.064898	NaN	0		1285300
1837	AAPAHPTYAEMVSEAITALK	20	A0A3B6KR72	H15 domain-containing protein OS=Triticum aestivum OX=4565 PE=3 SV=1	0W_1	3	691.022	0.17698	0.00055392	1	40.952	48523000
1838	AAPAHPTYAEMVSEAITALK	20	A0A3B6KR72	H15 domain-containing protein OS=Triticum aestivum OX=4565 PE=3 SV=1	2W_1	3	691.022	-0.40115	0.00024498	1	55.453	136970000
1839	AAPAHPTYAEMVSEAITALK	20	A0A3B6KR72	H15 domain-containing protein OS=Triticum aestivum OX=4565 PE=3 SV=1	0W_2	3	691.022	0.14873	0.0042879	2	29.172	49893000
1840	AAPAHPTYAEMVSEAITALK	20	A0A3B6KR72	H15 domain-containing protein OS=Triticum aestivum OX=4565 PE=3 SV=1	0W_2	3	691.022	-0.93511	0.042301	1	17.678	2924000
1841	AAPAHPTYAEMVSEAITALK	20	A0A3B6KR72	H15 domain-containing protein OS=Triticum aestivum OX=4565 PE=3 SV=1	2W_2	3	691.022	-0.10265	0.00028304	2	50.358	119070000
1842	AAPAHPTYAEMVSEAITALK	20	A0A3B6KR72	H15 domain-containing protein OS=Triticum aestivum OX=4565 PE=3 SV=1	0W_3	3	691.022	0.31441	0.00065199	2	38.878	51548000
1843	AAPAHPTYAEMVSEAITALK	20	A0A3B6KR72	H15 domain-containing protein OS=Triticum aestivum OX=4565 PE=3 SV=1	0W_3	3	691.022	1.0342	0.00065199	1	38.878	3995700
1844	AAPAHPTYAEMVSEAITALK	20	A0A3B6KR72	H15 domain-containing protein OS=Triticum aestivum OX=4565 PE=3 SV=1	2W_3	3	691.022	-0.047995	1.2723e-08	2	85.087	121240000
1845	AAPAHPTYAEMVSEAITALK	20	A0A3B6KR72	H15 domain-containing protein OS=Triticum aestivum OX=4565 PE=3 SV=1	2W_3	2	1036.03	-2.2393	0.043497	1	24.407	5923100
1846	AAPAVAAAPSAR	12	A0A1D6CXJ5	T-complex protein 1 subunit delta OS=Triticum aestivum OX=4565 PE=3 SV=1	2W_1	2	526.796	-0.025477	0.0034495	1	57.175	4947800
1847	AAPAVITR	8	A0A3B6JIZ2	Enolase-like protein(predicted) OS=Triticum aestivum OX=4565 PE=3 SV=1	0W_1	2	399.745		0.031511	1	58.981	0
1848	AAPAVITR	8	A0A3B6JIZ2	Enolase-like protein(predicted) OS=Triticum aestivum OX=4565 PE=3 SV=1	2W_1	2	399.745	1.1111	0.01561	1	84.498	4315100
1849	AAPAVITR	8	A0A3B6JIZ2	Enolase-like protein(predicted) OS=Triticum aestivum OX=4565 PE=3 SV=1	2W_3	2	399.745	1.4411	0.045449	1	58.981	6875600
1850	AAPGDVLFFHYSGHGTLVPPR	21	A0A3B6MPN0	MC2D protein(predicted) OS=Triticum aestivum OX=4565 PE=4 SV=1	2W_1	4	560.292	0.13326	0.00041211	1	37.4	10682000
1851	AAPGDVLFFHYSGHGTLVPPR	21	A0A3B6MPN0	MC2D protein(predicted) OS=Triticum aestivum OX=4565 PE=4 SV=1	2W_2	4	560.292	-0.01841	0.00033504	1	40.952	8484500
1852	AAPGDVLFFHYSGHGTLVPPR	21	A0A3B6MPN0	MC2D protein(predicted) OS=Triticum aestivum OX=4565 PE=4 SV=1	2W_3	4	560.292	0.67426	0.0013717	1	32.353	10671000
1853	AAPGDVLFFHYSGHGTLVPPR	21	A0A3B6MPN0	MC2D protein(predicted) OS=Triticum aestivum OX=4565 PE=4 SV=1	0W_2	4	560.292	-0.21013	NaN	0		3406800
1854	AAPGGGAGADRPMVTFAR	18	A0A3B6R7N3	Putative cellulose synthase-like protein D2(predicted) OS=Triticum aestivum OX=4565 PE=3 SV=1	0W_1	3	567.955	0.79439	0.014846	1	30.489	7109100
1855	AAPGGGAGADRPMVTFAR	18	A0A3B6R7N3	Putative cellulose synthase-like protein D2(predicted) OS=Triticum aestivum OX=4565 PE=3 SV=1	2W_2	3	567.955	-0.20128	0.00022447	1	52.172	5684600
1856	AAPGGGAGADRPMVTFAR	18	A0A3B6R7N3	Putative cellulose synthase-like protein D2(predicted) OS=Triticum aestivum OX=4565 PE=3 SV=1	0W_3	3	567.955	-0.10991	0.0027209	1	36.637	7432000
1857	AAPGGGAGADRPMVTFAR	18	A0A3B6R7N3	Putative cellulose synthase-like protein D2(predicted) OS=Triticum aestivum OX=4565 PE=3 SV=1	2W_1	3	567.955	-0.16944	NaN	0		6705900
1858	AAPGGGAGADRPMVTFAR	18	A0A3B6R7N3	Putative cellulose synthase-like protein D2(predicted) OS=Triticum aestivum OX=4565 PE=3 SV=1	0W_2	3	567.955	0.38374	NaN	0		7368300
1859	AAPGGGAGADRPMVTFAR	18	A0A3B6R7N3	Putative cellulose synthase-like protein D2(predicted) OS=Triticum aestivum OX=4565 PE=3 SV=1	2W_3	3	567.955	0.040529	NaN	0		7458700
1860	AAPGGGGATDAGPEDSFFEMVTLQPGGVYTK	31	A0A3B6JIU6	Bac_surface_Ag domain-containing protein OS=Triticum aestivum OX=4565 PE=4 SV=1	2W_1	3	1009.81	-0.65997	6.0737e-12	1	58.168	47825000
1861	AAPGGGGATDAGPEDSFFEMVTLQPGGVYTK	31	A0A3B6JIU6	Bac_surface_Ag domain-containing protein OS=Triticum aestivum OX=4565 PE=4 SV=1	2W_2	3	1009.81	-0.88827	6.432e-12	1	57.629	40072000
1862	AAPGGGGATDAGPEDSFFEMVTLQPGGVYTK	31	A0A3B6JIU6	Bac_surface_Ag domain-containing protein OS=Triticum aestivum OX=4565 PE=4 SV=1	2W_3	3	1009.81	-1.1378	7.5096e-12	1	56.573	32359000
1863	AAPGLLGRPTGGVGGR	16	A0A3B6HRL5	DEAD-box ATP-dependent RNA helicase 52C(predicted) OS=Triticum aestivum OX=4565 PE=4 SV=1	0W_1	3	479.276	-0.089273	0.00065336	1	49.595	8410100
1864	AAPGLLGRPTGGVGGR	16	A0A3B6HRL5	DEAD-box ATP-dependent RNA helicase 52C(predicted) OS=Triticum aestivum OX=4565 PE=4 SV=1	2W_1	3	479.276	0.62718	4.5475e-05	1	63.682	10194000
1865	AAPGLLGRPTGGVGGR	16	A0A3B6HRL5	DEAD-box ATP-dependent RNA helicase 52C(predicted) OS=Triticum aestivum OX=4565 PE=4 SV=1	0W_2	3	479.276	0.2661	0.00010111	1	56.514	10250000
1866	AAPGLLGRPTGGVGGR	16	A0A3B6HRL5	DEAD-box ATP-dependent RNA helicase 52C(predicted) OS=Triticum aestivum OX=4565 PE=4 SV=1	2W_2	3	479.276	0.69501	9.0757e-06	1	80.632	11971000
1867	AAPGLLGRPTGGVGGR	16	A0A3B6HRL5	DEAD-box ATP-dependent RNA helicase 52C(predicted) OS=Triticum aestivum OX=4565 PE=4 SV=1	0W_3	3	479.276	0.16652	9.0757e-06	1	80.632	8861000
1868	AAPGLLGRPTGGVGGR	16	A0A3B6HRL5	DEAD-box ATP-dependent RNA helicase 52C(predicted) OS=Triticum aestivum OX=4565 PE=4 SV=1	2W_3	3	479.276	0.575	9.0757e-06	1	80.632	10892000
1869	AAPGLLGRPTSGVGGR	16	A0A3B6JH99	DEAD-box ATP-dependent RNA helicase 52C(predicted) OS=Triticum aestivum OX=4565 PE=4 SV=1	0W_1	3	489.279	-0.19185	1.6058e-05	1	71.08	18675000
1870	AAPGLLGRPTSGVGGR	16	A0A3B6JH99	DEAD-box ATP-dependent RNA helicase 52C(predicted) OS=Triticum aestivum OX=4565 PE=4 SV=1	2W_1	3	489.279	0.48009	0.0002211	1	55.011	22430000
1871	AAPGLLGRPTSGVGGR	16	A0A3B6JH99	DEAD-box ATP-dependent RNA helicase 52C(predicted) OS=Triticum aestivum OX=4565 PE=4 SV=1	2W_2	3	489.279	0.43779	4.9621e-05	1	63.062	21385000
1872	AAPGLLGRPTSGVGGR	16	A0A3B6JH99	DEAD-box ATP-dependent RNA helicase 52C(predicted) OS=Triticum aestivum OX=4565 PE=4 SV=1	0W_3	3	489.279	0.24807	0.0083725	1	34.928	20804000
1873	AAPGLLGRPTSGVGGR	16	A0A3B6JH99	DEAD-box ATP-dependent RNA helicase 52C(predicted) OS=Triticum aestivum OX=4565 PE=4 SV=1	2W_3	3	489.279	0.61979	5.0961e-05	1	62.861	23452000
1874	AAPGLLGRPTSGVGGR	16	A0A3B6JH99	DEAD-box ATP-dependent RNA helicase 52C(predicted) OS=Triticum aestivum OX=4565 PE=4 SV=1	0W_2	3	489.279	0.23751	NaN	0		21001000
1875	AAPGQMPVYGR	11	A0A3B5Y1E8	Expressed protein(predicted) OS=Triticum aestivum OX=4565 PE=4 SV=1	2W_1	2	581.787	-0.70758	0.0012381	1	65.719	10810000
1876	AAPGQMPVYGR	11	A0A3B5Y1E8	Expressed protein(predicted) OS=Triticum aestivum OX=4565 PE=4 SV=1	2W_1	2	581.787	-1.0797	0.0080519	1	48.998	8831300
1877	AAPGQMPVYGR	11	A0A3B5Y1E8	Expressed protein(predicted) OS=Triticum aestivum OX=4565 PE=4 SV=1	2W_2	2	581.787	-0.6175	0.0011809	1	66.056	10436000
1878	AAPGQMPVYGR	11	A0A3B5Y1E8	Expressed protein(predicted) OS=Triticum aestivum OX=4565 PE=4 SV=1	2W_2	2	581.787	-0.95241	0.0025877	1	57.785	8961600
1879	AAPGQMPVYGR	11	A0A3B5Y1E8	Expressed protein(predicted) OS=Triticum aestivum OX=4565 PE=4 SV=1	2W_3	2	581.787	-0.51117	0.0085452	1	48.284	11197000
1880	AAPGQMPVYGR	11	A0A3B5Y1E8	Expressed protein(predicted) OS=Triticum aestivum OX=4565 PE=4 SV=1	2W_3	2	581.787	-0.46949	0.017459	1	43.297	6599600
1881	AAPGQMPVYGR	11	A0A3B5Y1E8	Expressed protein(predicted) OS=Triticum aestivum OX=4565 PE=4 SV=1	0W_1	2	581.787	-0.92357	NaN	0		3570700
1882	AAPGQMPVYGR	11	A0A3B5Y1E8	Expressed protein(predicted) OS=Triticum aestivum OX=4565 PE=4 SV=1	0W_2	2	581.787	-0.35297	NaN	0		2678400
1883	AAPGQMPVYGR	11	A0A3B5Y1E8	Expressed protein(predicted) OS=Triticum aestivum OX=4565 PE=4 SV=1	2W_2	2	581.787	-0.31009	NaN	0		3322700
1884	AAPGQMPVYGR	11	A0A3B5Y1E8	Expressed protein(predicted) OS=Triticum aestivum OX=4565 PE=4 SV=1	0W_3	2	581.787	-0.52884	NaN	0		2531500
1885	AAPGQMPVYGR	11	A0A3B5Y1E8	Expressed protein(predicted) OS=Triticum aestivum OX=4565 PE=4 SV=1	2W_1	2	573.79	-0.43411	0.01289	1	53.597	22931000
1886	AAPGQMPVYGR	11	A0A3B5Y1E8	Expressed protein(predicted) OS=Triticum aestivum OX=4565 PE=4 SV=1	2W_2	2	573.79	-0.38204	0.016242	1	51.762	22667000
1887	AAPGQMPVYGR	11	A0A3B5Y1E8	Expressed protein(predicted) OS=Triticum aestivum OX=4565 PE=4 SV=1	0W_3	2	573.79	-0.68001	0.0016932	1	76.282	32860000
1888	AAPGQMPVYGR	11	A0A3B5Y1E8	Expressed protein(predicted) OS=Triticum aestivum OX=4565 PE=4 SV=1	2W_3	2	573.79	-0.73984	0.0081304	1	56.202	23118000
1889	AAPGQMPVYGR	11	A0A3B5Y1E8	Expressed protein(predicted) OS=Triticum aestivum OX=4565 PE=4 SV=1	0W_1	2	573.79	-1.0649	NaN	0		22456000
1890	AAPGQMPVYGR	11	A0A3B5Y1E8	Expressed protein(predicted) OS=Triticum aestivum OX=4565 PE=4 SV=1	0W_2	2	573.79	-1.2	NaN	0		18708000
1891	AAPKDPNTPKR	11	A0A3B6KGS2	H15 domain-containing protein OS=Triticum aestivum OX=4565 PE=4 SV=1	0W_1	3	398.891	0.41156	0.029086	1	44.612	3241500
1892	AAPKDPNTPKR	11	A0A3B6KGS2	H15 domain-containing protein OS=Triticum aestivum OX=4565 PE=4 SV=1	0W_2	3	398.891	0.81484	0.014284	1	50.786	3586500
1893	AAPKDPNTPKR	11	A0A3B6KGS2	H15 domain-containing protein OS=Triticum aestivum OX=4565 PE=4 SV=1	0W_3	3	398.891	0.88801	0.0022579	1	66.663	5452100
1894	AAPKDPNTPKR	11	A0A3B6KGS2	H15 domain-containing protein OS=Triticum aestivum OX=4565 PE=4 SV=1	2W_1	3	398.891	-0.22287	NaN	0		2427200
1895	AAPKDPNTPKR	11	A0A3B6KGS2	H15 domain-containing protein OS=Triticum aestivum OX=4565 PE=4 SV=1	2W_2	3	398.891	0.07223	NaN	0		2379000
1896	AAPKDPNTPKR	11	A0A3B6KGS2	H15 domain-containing protein OS=Triticum aestivum OX=4565 PE=4 SV=1	2W_3	3	398.891	-0.16775	NaN	0		1749400
1897	AAPLPMSPLESLASSAVR	18	A0A1D5UPJ6	Pyruvate kinase OS=Triticum aestivum OX=4565 GN=CAMPLR22A2D_LOCUS5537 PE=3 SV=1	0W_1	2	906.98	2.2818	0.00022321	1	51.089	10844000
1898	AAPLPMSPLESLASSAVR	18	A0A1D5UPJ6	Pyruvate kinase OS=Triticum aestivum OX=4565 GN=CAMPLR22A2D_LOCUS5537 PE=3 SV=1	0W_1	2	906.98	0.12731	0.0010839	1	42.633	21741000
1899	AAPLPMSPLESLASSAVR	18	A0A1D5UPJ6	Pyruvate kinase OS=Triticum aestivum OX=4565 GN=CAMPLR22A2D_LOCUS5537 PE=3 SV=1	2W_1	2	906.98	2.1453	1.007e-05	1	68.243	31406000
1900	AAPLPMSPLESLASSAVR	18	A0A1D5UPJ6	Pyruvate kinase OS=Triticum aestivum OX=4565 GN=CAMPLR22A2D_LOCUS5537 PE=3 SV=1	2W_1	2	906.98	-0.12225	0.00015985	1	54.103	29351000
1901	AAPLPMSPLESLASSAVR	18	A0A1D5UPJ6	Pyruvate kinase OS=Triticum aestivum OX=4565 GN=CAMPLR22A2D_LOCUS5537 PE=3 SV=1	2W_2	2	906.98	2.4742	9.8977e-06	1	68.41	25479000
1902	AAPLPMSPLESLASSAVR	18	A0A1D5UPJ6	Pyruvate kinase OS=Triticum aestivum OX=4565 GN=CAMPLR22A2D_LOCUS5537 PE=3 SV=1	2W_2	2	906.98	-0.30069	3.8749e-07	1	85.563	28904000
1903	AAPLPMSPLESLASSAVR	18	A0A1D5UPJ6	Pyruvate kinase OS=Triticum aestivum OX=4565 GN=CAMPLR22A2D_LOCUS5537 PE=3 SV=1	0W_3	2	906.98	0.03402	0.00015985	1	54.103	26379000
1904	AAPLPMSPLESLASSAVR	18	A0A1D5UPJ6	Pyruvate kinase OS=Triticum aestivum OX=4565 GN=CAMPLR22A2D_LOCUS5537 PE=3 SV=1	2W_3	2	906.98	2.1789	0.00014595	1	54.764	25298000
1905	AAPLPMSPLESLASSAVR	18	A0A1D5UPJ6	Pyruvate kinase OS=Triticum aestivum OX=4565 GN=CAMPLR22A2D_LOCUS5537 PE=3 SV=1	2W_3	2	906.98	-0.25579	1.7443e-06	1	76.378	28080000
1906	AAPLPMSPLESLASSAVR	18	A0A1D5UPJ6	Pyruvate kinase OS=Triticum aestivum OX=4565 GN=CAMPLR22A2D_LOCUS5537 PE=3 SV=1	0W_2	2	906.98	2.9972	NaN	0		8321700
1907	AAPLPMSPLESLASSAVR	18	A0A1D5UPJ6	Pyruvate kinase OS=Triticum aestivum OX=4565 GN=CAMPLR22A2D_LOCUS5537 PE=3 SV=1	0W_1	2	898.982	0.19996	0.013975	1	34.174	162260000
1908	AAPLPMSPLESLASSAVR	18	A0A1D5UPJ6	Pyruvate kinase OS=Triticum aestivum OX=4565 GN=CAMPLR22A2D_LOCUS5537 PE=3 SV=1	0W_1	3	599.657	-0.40394	0.00014425	1	48.288	47392000
1909	AAPLPMSPLESLASSAVR	18	A0A1D5UPJ6	Pyruvate kinase OS=Triticum aestivum OX=4565 GN=CAMPLR22A2D_LOCUS5537 PE=3 SV=1	2W_1	2	898.982	-0.58265	0.00052932	1	52.185	186250000
1910	AAPLPMSPLESLASSAVR	18	A0A1D5UPJ6	Pyruvate kinase OS=Triticum aestivum OX=4565 GN=CAMPLR22A2D_LOCUS5537 PE=3 SV=1	2W_1	3	599.657	-0.72503	0.0081046	1	38.418	37284000
1911	AAPLPMSPLESLASSAVR	18	A0A1D5UPJ6	Pyruvate kinase OS=Triticum aestivum OX=4565 GN=CAMPLR22A2D_LOCUS5537 PE=3 SV=1	0W_2	3	599.657	-0.25412	0.00035258	1	44.391	44959000
1912	AAPLPMSPLESLASSAVR	18	A0A1D5UPJ6	Pyruvate kinase OS=Triticum aestivum OX=4565 GN=CAMPLR22A2D_LOCUS5537 PE=3 SV=1	0W_2	2	898.982	-0.14645	0.00074591	1	48.288	151150000
1913	AAPLPMSPLESLASSAVR	18	A0A1D5UPJ6	Pyruvate kinase OS=Triticum aestivum OX=4565 GN=CAMPLR22A2D_LOCUS5537 PE=3 SV=1	2W_2	2	898.982	-0.38476	0.00013881	1	62.658	166760000
1914	AAPLPMSPLESLASSAVR	18	A0A1D5UPJ6	Pyruvate kinase OS=Triticum aestivum OX=4565 GN=CAMPLR22A2D_LOCUS5537 PE=3 SV=1	0W_3	2	898.982	-0.29306	0.003531	1	41.513	146250000
1915	AAPLPMSPLESLASSAVR	18	A0A1D5UPJ6	Pyruvate kinase OS=Triticum aestivum OX=4565 GN=CAMPLR22A2D_LOCUS5537 PE=3 SV=1	0W_3	3	599.657	-1.1386	0.00010652	1	51.798	39742000
1916	AAPLPMSPLESLASSAVR	18	A0A1D5UPJ6	Pyruvate kinase OS=Triticum aestivum OX=4565 GN=CAMPLR22A2D_LOCUS5537 PE=3 SV=1	2W_3	2	898.982	-0.80485	9.0668e-06	1	74.732	206450000
1917	AAPLPMSPLESLASSAVR	18	A0A1D5UPJ6	Pyruvate kinase OS=Triticum aestivum OX=4565 GN=CAMPLR22A2D_LOCUS5537 PE=3 SV=1	2W_2	3	599.657	0.033113	NaN	0		51854000
1918	AAPLPMSPLESLASSAVR	18	A0A1D5UPJ6	Pyruvate kinase OS=Triticum aestivum OX=4565 GN=CAMPLR22A2D_LOCUS5537 PE=3 SV=1	2W_3	3	599.657	-0.3987	NaN	0		40744000
1919	AAPLPMSPLESLASSAVR	18	A0A1D5UPJ6	Pyruvate kinase OS=Triticum aestivum OX=4565 GN=CAMPLR22A2D_LOCUS5537 PE=3 SV=1	2W_3	2	898.982	-0.71448	NaN	0		2715300
1920	AAPPAPAPDTTVR	13	A0A3B6TLM8	Reticulon-like protein OS=Triticum aestivum OX=4565 PE=4 SV=1	2W_1	2	632.338	-0.016074	0.022042	1	42.317	22413000
1921	AAPPAPAPDTTVR	13	A0A3B6TLM8	Reticulon-like protein OS=Triticum aestivum OX=4565 PE=4 SV=1	2W_2	2	632.338	-0.019286	0.042563	1	36.292	20810000
1922	AAPPAPAPDTTVR	13	A0A3B6TLM8	Reticulon-like protein OS=Triticum aestivum OX=4565 PE=4 SV=1	0W_3	2	632.338	-0.084129	0.017123	1	43.761	13613000
1923	AAPPAPAPDTTVR	13	A0A3B6TLM8	Reticulon-like protein OS=Triticum aestivum OX=4565 PE=4 SV=1	2W_3	2	632.338	0.066733	0.0055951	1	51.726	19926000
1924	AAPPAPAPDTTVR	13	A0A3B6TLM8	Reticulon-like protein OS=Triticum aestivum OX=4565 PE=4 SV=1	0W_1	2	632.338	0.38087	NaN	0		14191000
1925	AAPPAPAPDTTVR	13	A0A3B6TLM8	Reticulon-like protein OS=Triticum aestivum OX=4565 PE=4 SV=1	0W_2	2	632.338	0.10539	NaN	0		15266000
1926	AAPPPVLTLAVEK	13	A0A3B6TIT0	FHA domain-containing protein OS=Triticum aestivum OX=4565 PE=4 SV=1	0W_1	2	674.398	1.6474	0.0022094	1	51.726	4869600
1927	AAPPPVLTLAVEK	13	A0A3B6TIT0	FHA domain-containing protein OS=Triticum aestivum OX=4565 PE=4 SV=1	2W_2	2	674.398	1.2267	0.010554	1	40.941	8370700
1928	AAPPPVLTLAVEK	13	A0A3B6TIT0	FHA domain-containing protein OS=Triticum aestivum OX=4565 PE=4 SV=1	2W_1	2	674.398	0.97145	NaN	0		8161700
1929	AAPPPVLTLAVEK	13	A0A3B6TIT0	FHA domain-containing protein OS=Triticum aestivum OX=4565 PE=4 SV=1	0W_2	2	674.398	2.5029	NaN	0		8160900
1930	AAPPPVLTLAVEK	13	A0A3B6TIT0	FHA domain-containing protein OS=Triticum aestivum OX=4565 PE=4 SV=1	0W_3	2	674.398	1.6176	NaN	0		8064700
1931	AAPPPVLTLAVEK	13	A0A3B6TIT0	FHA domain-containing protein OS=Triticum aestivum OX=4565 PE=4 SV=1	2W_3	2	674.398	1.16	NaN	0		10811000
1932	AAPPSQASLLLQK	13	W4ZSH7	UBIQUITIN_CONJUGAT_2 domain-containing protein OS=Triticum aestivum OX=4565 PE=3 SV=1	0W_1	2	683.39	-0.89503	0.0072411	1	43.405	10660000
1933	AAPPSQASLLLQK	13	W4ZSH7	UBIQUITIN_CONJUGAT_2 domain-containing protein OS=Triticum aestivum OX=4565 PE=3 SV=1	2W_3	2	683.39		0.0018705	1	52.576	0
1934	AAPQQQPTGANIR	13	A0A3B5Y3H0	Metacaspase 3(predicted) OS=Triticum aestivum OX=4565 PE=4 SV=1	0W_1	2	676.357	-0.12912	0.0013086	1	62.088	43227000
1935	AAPQQQPTGANIR	13	A0A3B5Y3H0	Metacaspase 3(predicted) OS=Triticum aestivum OX=4565 PE=4 SV=1	2W_1	2	676.357	0.19926	1.2755e-05	1	99.732	81595000
1936	AAPQQQPTGANIR	13	A0A3B5Y3H0	Metacaspase 3(predicted) OS=Triticum aestivum OX=4565 PE=4 SV=1	0W_2	2	676.357	0.076037	0.0094135	1	46.159	32933000
1937	AAPQQQPTGANIR	13	A0A3B5Y3H0	Metacaspase 3(predicted) OS=Triticum aestivum OX=4565 PE=4 SV=1	2W_2	2	676.357	0.033149	0.00013053	1	85.554	76066000
1938	AAPQQQPTGANIR	13	A0A3B5Y3H0	Metacaspase 3(predicted) OS=Triticum aestivum OX=4565 PE=4 SV=1	0W_3	2	676.357	-0.22739	0.002523	1	56.205	39269000
1939	AAPQQQPTGANIR	13	A0A3B5Y3H0	Metacaspase 3(predicted) OS=Triticum aestivum OX=4565 PE=4 SV=1	2W_3	2	676.357	0.25687	2.5708e-08	1	111.94	73635000
1940	AAPSVQALDQK	11	A0A3B6AZ86	Exocyst complex component SEC5 OS=Triticum aestivum OX=4565 PE=3 SV=1	0W_1	2	564.306	0.52116	0.0066688	1	58.172	15261000
1941	AAPSVQALDQK	11	A0A3B6AZ86	Exocyst complex component SEC5 OS=Triticum aestivum OX=4565 PE=3 SV=1	2W_1	2	564.306	-0.12749	0.0018663	1	74.53	26955000
1942	AAPSVQALDQK	11	A0A3B6AZ86	Exocyst complex component SEC5 OS=Triticum aestivum OX=4565 PE=3 SV=1	0W_3	2	564.306	0.54387	0.0066688	1	58.172	14480000
1943	AAPSVQALDQK	11	A0A3B6AZ86	Exocyst complex component SEC5 OS=Triticum aestivum OX=4565 PE=3 SV=1	2W_2	2	564.306	-0.148	NaN	0		24766000
1944	AAPSVQALDQK	11	A0A3B6AZ86	Exocyst complex component SEC5 OS=Triticum aestivum OX=4565 PE=3 SV=1	2W_3	2	564.306	0.018969	NaN	0		23583000
1945	AAPTLTHMALVELER	15	A0A3B6C1T3	Deacetylase sirtuin-type domain-containing protein OS=Triticum aestivum OX=4565 PE=4 SV=1	0W_1	3	551.299	0.35705	0.0037758	1	36.029	2337400
1946	AAPTLTHMALVELER	15	A0A3B6C1T3	Deacetylase sirtuin-type domain-containing protein OS=Triticum aestivum OX=4565 PE=4 SV=1	0W_2	3	551.299	0.037709	0.013485	1	31.089	2393600
1947	AAPTLTHMALVELER	15	A0A3B6C1T3	Deacetylase sirtuin-type domain-containing protein OS=Triticum aestivum OX=4565 PE=4 SV=1	0W_3	3	551.299	-1.8538	NaN	0		140890
1948	AAPVIIVPGK	10	A0A3B6QJX9	Usp domain-containing protein OS=Triticum aestivum OX=4565 PE=4 SV=1	2W_3	2	482.813	0.44097	0.056701	1	44.318	8195200
1949	AAPVIIVPGK	10	A0A3B6QJX9	Usp domain-containing protein OS=Triticum aestivum OX=4565 PE=4 SV=1	0W_1	2	482.813	-0.3466	NaN	0		2168800
1950	AAPVIIVPGK	10	A0A3B6QJX9	Usp domain-containing protein OS=Triticum aestivum OX=4565 PE=4 SV=1	2W_1	2	482.813	0.17196	NaN	0		6266800
1951	AAPVIIVPGK	10	A0A3B6QJX9	Usp domain-containing protein OS=Triticum aestivum OX=4565 PE=4 SV=1	0W_2	2	482.813	-0.60354	NaN	0		2275700
1952	AAPVIIVPGK	10	A0A3B6QJX9	Usp domain-containing protein OS=Triticum aestivum OX=4565 PE=4 SV=1	2W_2	2	482.813	-0.34348	NaN	0		7494100
1953	AAPVIIVPGK	10	A0A3B6QJX9	Usp domain-containing protein OS=Triticum aestivum OX=4565 PE=4 SV=1	0W_3	2	482.813	-0.49452	NaN	0		2441300
1954	AAPVIIVPGK	10	A0A3B6QJX9	Usp domain-containing protein OS=Triticum aestivum OX=4565 PE=4 SV=1	2W_3	2	482.813	0.41025	NaN	0		7655600
1955	AAPVTVYGPAISPAVAR	17	A0A3B6KTD4	Glutathione S-transferase, N-terminal domain containing protein, expressed(predicted) OS=Triticum aestivum OX=4565 PE=3 SV=1	2W_1	2	841.467	1.7816	0.00052245	1	46.892	5950300
1956	AAPVTVYGPAISPAVAR	17	A0A3B6KTD4	Glutathione S-transferase, N-terminal domain containing protein, expressed(predicted) OS=Triticum aestivum OX=4565 PE=3 SV=1	2W_3	2	841.467	1.8496	0.00052245	1	46.892	5477800
1957	AAPVTVYGPAISPAVAR	17	A0A3B6KTD4	Glutathione S-transferase, N-terminal domain containing protein, expressed(predicted) OS=Triticum aestivum OX=4565 PE=3 SV=1	0W_2	2	841.467	1.4444	NaN	0		2798700
1958	AAPVVDAEYLR	11	A0A3B6TRE9	PEROXIDASE_4 domain-containing protein OS=Triticum aestivum OX=4565 PE=3 SV=1	0W_1	2	623.327	0.26471	0.00097086	1	68.536	107640000
1959	AAPVVDAEYLR	11	A0A3B6TRE9	PEROXIDASE_4 domain-containing protein OS=Triticum aestivum OX=4565 PE=3 SV=1	2W_1	2	623.327	0.47265	0.00018673	1	88.596	161500000
1960	AAPVVDAEYLR	11	A0A3B6TRE9	PEROXIDASE_4 domain-containing protein OS=Triticum aestivum OX=4565 PE=3 SV=1	0W_2	2	623.327	0.59649	0.0024511	1	59.198	82557000
1961	AAPVVDAEYLR	11	A0A3B6TRE9	PEROXIDASE_4 domain-containing protein OS=Triticum aestivum OX=4565 PE=3 SV=1	2W_2	2	623.327	0.96171	0.00097086	1	68.536	154650000
1962	AAPVVDAEYLR	11	A0A3B6TRE9	PEROXIDASE_4 domain-containing protein OS=Triticum aestivum OX=4565 PE=3 SV=1	0W_3	2	623.327	0.68669	5.4386e-06	1	99.283	104270000
1963	AAPVVDAEYLR	11	A0A3B6TRE9	PEROXIDASE_4 domain-containing protein OS=Triticum aestivum OX=4565 PE=3 SV=1	2W_3	2	623.327	0.7651	NaN	0		173180000
1964	AAPYQPPK	8	A0A3B6ISA1	RRM domain-containing protein OS=Triticum aestivum OX=4565 PE=4 SV=1	2W_1	2	436.237	-1.3387	0.054626	1	55.676	29987000
1965	AAPYQPPK	8	A0A3B6ISA1	RRM domain-containing protein OS=Triticum aestivum OX=4565 PE=4 SV=1	0W_2	2	436.237	0.1826	0.041701	1	60.972	17110000
1966	AAPYQPPK	8	A0A3B6ISA1	RRM domain-containing protein OS=Triticum aestivum OX=4565 PE=4 SV=1	2W_2	2	436.237	0.22578	0.05026	1	56.547	26484000
1967	AAPYQPPK	8	A0A3B6ISA1	RRM domain-containing protein OS=Triticum aestivum OX=4565 PE=4 SV=1	2W_3	2	436.237	0.27549	0.05026	1	56.547	28935000
1968	AAPYQPPK	8	A0A3B6ISA1	RRM domain-containing protein OS=Triticum aestivum OX=4565 PE=4 SV=1	0W_3	2	436.237	0.56212	NaN	0		23075000
1969	AAPYQPPKAPESAWQHDMYSDASAR	25	A0A3B6ISA1	RRM domain-containing protein OS=Triticum aestivum OX=4565 PE=4 SV=1	0W_1	4	694.321	-1.8794	0.0007973	1	29.539	18870000
1970	AAPYQPPKAPESAWQHDMYSDASAR	25	A0A3B6ISA1	RRM domain-containing protein OS=Triticum aestivum OX=4565 PE=4 SV=1	0W_2	4	694.321	-1.2485	0.037364	1	16.712	27384000
1971	AAPYQPPKAPESAWQHDMYSDASAR	25	A0A3B6ISA1	RRM domain-containing protein OS=Triticum aestivum OX=4565 PE=4 SV=1	2W_2	4	694.321	-1.2791	0.009231	1	22.988	21802000
1972	AAPYQPPKAPESAWQHDMYSDASAR	25	A0A3B6ISA1	RRM domain-containing protein OS=Triticum aestivum OX=4565 PE=4 SV=1	0W_3	4	694.321	-1.3116	0.00027192	1	33.649	19112000
1973	AAPYQPPKAPESAWQHDMYSDASAR	25	A0A3B6ISA1	RRM domain-containing protein OS=Triticum aestivum OX=4565 PE=4 SV=1	2W_3	4	694.321	-1.5548	2.1345e-05	1	46.399	19410000
1974	AAPYQPPKAPESAWQHDMYSDASAR	25	A0A3B6ISA1	RRM domain-containing protein OS=Triticum aestivum OX=4565 PE=4 SV=1	2W_1	4	694.321	-0.67901	NaN	0		19815000
1975	AAQAQAGHVPYR	12	A0A3B6JKV4	PUM-HD domain-containing protein OS=Triticum aestivum OX=4565 PE=4 SV=1	2W_1	3	423.555	-2.3826	0.011916	1	37.18	5056300
1976	AAQAQAGHVPYR	12	A0A3B6JKV4	PUM-HD domain-containing protein OS=Triticum aestivum OX=4565 PE=4 SV=1	2W_2	3	423.555	-0.18442	0.0016356	1	52.247	4858500
1977	AAQAQAGHVPYR	12	A0A3B6JKV4	PUM-HD domain-containing protein OS=Triticum aestivum OX=4565 PE=4 SV=1	2W_2	2	634.828	1.0641	0.008458	1	52.247	1503300
1978	AAQAQAGHVPYR	12	A0A3B6JKV4	PUM-HD domain-containing protein OS=Triticum aestivum OX=4565 PE=4 SV=1	2W_3	3	423.555	-2.3806	0.0016356	1	52.247	6825100
1979	AAQAQAGHVPYR	12	A0A3B6JKV4	PUM-HD domain-containing protein OS=Triticum aestivum OX=4565 PE=4 SV=1	0W_1	2	634.828	0.46477	NaN	0		574980
1980	AAQAQAGHVPYR	12	A0A3B6JKV4	PUM-HD domain-containing protein OS=Triticum aestivum OX=4565 PE=4 SV=1	0W_1	3	423.555	0.21497	NaN	0		2416600
1981	AAQAQAGHVPYR	12	A0A3B6JKV4	PUM-HD domain-containing protein OS=Triticum aestivum OX=4565 PE=4 SV=1	2W_1	2	634.828	1.1884	NaN	0		1928300
1982	AAQAQAGHVPYR	12	A0A3B6JKV4	PUM-HD domain-containing protein OS=Triticum aestivum OX=4565 PE=4 SV=1	0W_2	2	634.828	1.4558	NaN	0		748990
1983	AAQAQAGHVPYR	12	A0A3B6JKV4	PUM-HD domain-containing protein OS=Triticum aestivum OX=4565 PE=4 SV=1	0W_2	3	423.555	0.31958	NaN	0		2224200
1984	AAQAQAGHVPYR	12	A0A3B6JKV4	PUM-HD domain-containing protein OS=Triticum aestivum OX=4565 PE=4 SV=1	0W_3	2	634.828	1.0043	NaN	0		624790
1985	AAQAQAGHVPYR	12	A0A3B6JKV4	PUM-HD domain-containing protein OS=Triticum aestivum OX=4565 PE=4 SV=1	0W_3	3	423.555	0.015844	NaN	0		2248300
1986	AAQAQAGHVPYR	12	A0A3B6JKV4	PUM-HD domain-containing protein OS=Triticum aestivum OX=4565 PE=4 SV=1	2W_3	2	634.828	0.94277	NaN	0		2641900
1987	AAQAQAGHVPYR	12	A0A3B6JKV4	PUM-HD domain-containing protein OS=Triticum aestivum OX=4565 PE=4 SV=1	2W_3	3	423.555	0.094964	NaN	0		1063000
1988	AAQAQAGYVPYR	12	A0A3B6IW57	PUM-HD domain-containing protein OS=Triticum aestivum OX=4565 PE=4 SV=1	0W_1	2	647.831	-0.26999	0.0073839	1	53.211	3390000
1989	AAQAQAGYVPYR	12	A0A3B6IW57	PUM-HD domain-containing protein OS=Triticum aestivum OX=4565 PE=4 SV=1	0W_2	2	647.831	-0.45338	0.008458	1	52.247	3358200
1990	AAQAQAGYVPYR	12	A0A3B6IW57	PUM-HD domain-containing protein OS=Triticum aestivum OX=4565 PE=4 SV=1	0W_3	2	647.831	-0.30853	0.00087477	1	69.721	3537200
1991	AAQAQAGYVPYR	12	A0A3B6IW57	PUM-HD domain-containing protein OS=Triticum aestivum OX=4565 PE=4 SV=1	2W_3	2	647.831		7.2954e-08	1	87.568	0
1992	AAQDIALADLAPTHPIR	17	Q9FXQ9	TaWIN1 OS=Triticum aestivum OX=4565 GN=TaWIN1 PE=2 SV=1	0W_1	3	591.66	-0.02984	7.3936e-07	1	81.594	27979000
1993	AAQDIALADLAPTHPIR	17	Q9FXQ9	TaWIN1 OS=Triticum aestivum OX=4565 GN=TaWIN1 PE=2 SV=1	2W_1	3	591.66	0.36872	2.257e-05	1	60.307	53712000
1994	AAQDIALADLAPTHPIR	17	Q9FXQ9	TaWIN1 OS=Triticum aestivum OX=4565 GN=TaWIN1 PE=2 SV=1	0W_2	3	591.66	-0.22683	2.8001e-06	1	70.117	31544000
1995	AAQDIALADLAPTHPIR	17	Q9FXQ9	TaWIN1 OS=Triticum aestivum OX=4565 GN=TaWIN1 PE=2 SV=1	2W_2	3	591.66	0.063047	2.8415e-06	1	69.979	50028000
1996	AAQDIALADLAPTHPIR	17	Q9FXQ9	TaWIN1 OS=Triticum aestivum OX=4565 GN=TaWIN1 PE=2 SV=1	0W_3	3	591.66	-0.022145	1.2249e-06	1	75.376	27143000
1997	AAQDIALADLAPTHPIR	17	Q9FXQ9	TaWIN1 OS=Triticum aestivum OX=4565 GN=TaWIN1 PE=2 SV=1	2W_3	3	591.66	-0.15405	2.3154e-05	1	60.093	48477000
[truncated: 191,028 more rows]

## Sheet: Table S2
Table S2. The list of unique proteins identified from extracted nucleus of wheat developing grains.
Protein accession	Protein description	Gene name	Sequence coverage [%]	Mol. weight [kDa]	MS/MS Counts	Peptides	Unique peptides	0W/2W Ratio	0W/2W P value
A0A060AJU9	Defensin OS=Triticum aestivum OX=4565 GN=PDF27 PE=2 SV=1	PDF27	22	9.0945	18	2	1	3.224	0.00028045
A0A060APV2	Defensin OS=Triticum aestivum OX=4565 GN=PDF20 PE=2 SV=1	PDF20	19.2	8.3478	18	2	2	1.456	0.0059952
A0A068B052	FVE OS=Triticum aestivum OX=4565 GN=FVE PE=4 SV=1	FVE	40.4	50.283	6	12	1	0.227	2.1571e-05
A0A077RET6	probable pectin methylesterase CGR2(predicted) OS=Triticum aestivum OX=4565 GN=TRAES_3BF037800010CFD_c1 PE=4 SV=1	TRAES_3BF037800010CFD_c1	28.8	28.143	4	5	1	0.959	0.6446
A0A077RFH6	Rapid alkalinization factor 1(predicted) OS=Triticum aestivum OX=4565 GN=TRAES_3BF096400010CFD_c1 PE=4 SV=1	TRAES_3BF096400010CFD_c1	20.3	13.419	9	2	1	1.447	0.33902
A0A077RNW0	G patch domain-containing protein 4(predicted) OS=Triticum aestivum OX=4565 GN=TRAES_3BF171500090CFD_c1 PE=4 SV=1	TRAES_3BF171500090CFD_c1	14.7	24.905	7	2	2	0.991	0.90402
A0A077RPD6	Nuclease S1(predicted) OS=Triticum aestivum OX=4565 GN=TRAES_3BF033900070CFD_c1 PE=4 SV=1	TRAES_3BF033900070CFD_c1	30.2	33.753	51	9	1	0.981	0.77024
A0A077RPE6	Alpha-glucosidase(predicted) OS=Triticum aestivum OX=4565 GN=TRAES_3BF091400360CFD_c1 PE=3 SV=1	TRAES_3BF091400360CFD_c1	15.2	103.89	13	14	3	2.529	0.0788
A0A077RPZ7	AA_TRNA_LIGASE_II domain-containing protein OS=Triticum aestivum OX=4565 GN=TRAES_3BF175400030CFD_c1 PE=3 SV=1	TRAES_3BF175400030CFD_c1	19.8	80.769	44	14	4	0.733	0.0087207
A0A077RQ33	Sphingosine-1-phosphate lyase(predicted) OS=Triticum aestivum OX=4565 GN=TRAES_3BF058200030CFD_c1 PE=3 SV=1	TRAES_3BF058200030CFD_c1	10.4	57.507	17	4	1	1.281	0.094077
A0A077RQB4	DEAD-box ATP-dependent RNA helicase 40(predicted) OS=Triticum aestivum OX=4565 GN=TRAES_3BF091200140CFD_c1 PE=4 SV=1	TRAES_3BF091200140CFD_c1	14.1	144.21	55	15	1	0.884	0.112101
A0A077RR00	KH domain-containing protein OS=Triticum aestivum OX=4565 GN=TRAES_3BF049800180CFD_c1 PE=4 SV=1	TRAES_3BF049800180CFD_c1	47.6	24.759	43	7	1	0.833	0.0157562
A0A077RR09	Furry(predicted) OS=Triticum aestivum OX=4565 GN=TRAES_3BF002700080CFD_c1 PE=4 SV=1	TRAES_3BF002700080CFD_c1	24.2	14.929	6	3	1	0.646	0.0127198
A0A077RR83	Peptide-N4-(N-acetyl-beta-glucosaminyl)asparagine amidase A(predicted) OS=Triticum aestivum OX=4565 GN=TRAES_3BF098600070CFD_c1 PE=4 SV=1	TRAES_3BF098600070CFD_c1	6.8	63.516	6	4	1	1.443	0.0196975
A0A077RS03	Phosphomethylpyrimidine synthase(predicted) OS=Triticum aestivum OX=4565 GN=TRAES_3BF010400470CFD_c1 PE=4 SV=1	TRAES_3BF010400470CFD_c1	6.9	43.552	10	2	2	1.409	0.00011638
A0A077RSB4	Coatomer subunit beta OS=Triticum aestivum OX=4565 GN=TRAES_3BF035100020CFD_c1 PE=4 SV=1	TRAES_3BF035100020CFD_c1	31.3	105.37	60	24	0	0.972	0.338
A0A077RSJ4	SIT4 phosphatase-associated family protein(predicted) OS=Triticum aestivum OX=4565 GN=TRAES_3BF021900050CFD_c1 PE=4 SV=1	TRAES_3BF021900050CFD_c1	4.7	87.5	7	4	4	1.055	0.2961
A0A077RSL8	Zinc finger CCCH domain-containing protein 8(predicted) OS=Triticum aestivum OX=4565 GN=TRAES_3BF093800020CFD_c1 PE=4 SV=1	TRAES_3BF093800020CFD_c1	16.9	54.814	4	5	0	1.25	0.0674
A0A077RTW4	Serine/threonine-protein phosphatase OS=Triticum aestivum OX=4565 GN=TRAES_3BF011700090CFD_c1 PE=3 SV=1	TRAES_3BF011700090CFD_c1	19.1	34.748	30	5	5	1.003	0.99828
A0A077RU79	Myosin-like protein(predicted) OS=Triticum aestivum OX=4565 GN=TRAES_3BF168600020CFD_c1 PE=4 SV=1	TRAES_3BF168600020CFD_c1	28.1	30.474	3	7	1	0.096
A0A077RU82	H0311C03.6 protein(predicted) OS=Triticum aestivum OX=4565 GN=TRAES_3BF022400010CFD_c1 PE=4 SV=1	TRAES_3BF022400010CFD_c1	10.4	80.559	7	8	1	1.034	0.73484
A0A077RUD3	Chorismate mutase OS=Triticum aestivum OX=4565 GN=TRAES_3BF003100010CFD_c1 PE=4 SV=1	TRAES_3BF003100010CFD_c1	10.7	35.246	8	3	3	0.486	0.176081
A0A077RVD7	OB-fold nucleic acid binding domain containing protein(predicted) OS=Triticum aestivum OX=4565 GN=TRAES_3BF062500090CFD_c1 PE=4 SV=1	TRAES_3BF062500090CFD_c1	16.6	15.415	8	2	2	0.769	0.02468
A0A077RVG0	PMEI domain-containing protein OS=Triticum aestivum OX=4565 GN=TRAES_3BF008500070CFD_c1 PE=4 SV=1	TRAES_3BF008500070CFD_c1	31.4	19.748	28	5	4	1.5	0.00026242
A0A077RVL4	Peptidase A1 domain-containing protein OS=Triticum aestivum OX=4565 GN=TRAES_3BF056800110CFD_c1 PE=3 SV=1	TRAES_3BF056800110CFD_c1	9.7	51.853	16	4	4	0.961	0.88498
A0A077RW06	Osmotin-like protein(predicted) OS=Triticum aestivum OX=4565 GN=TRAES_3BF112700030CFD_c1 PE=4 SV=1	TRAES_3BF112700030CFD_c1	41.6	25.873	56	8	6	0.785	0.00057559
A0A077RX05	DNA repair protein recA-like protein 3, mitochondrial(predicted) OS=Triticum aestivum OX=4565 GN=TRAES_3BF091800110CFD_c1 PE=3 SV=1	TRAES_3BF091800110CFD_c1	18.6	46.716	21	7	6	1.596	0.00033822
A0A077RX59	Translation machinery-associated protein 22 OS=Triticum aestivum OX=4565 GN=TRAES_3BF278300030CFD_c1 PE=3 SV=1	TRAES_3BF278300030CFD_c1	8.5	21.349	6	2	2	1.511	0.063519
A0A077RX76	Putative acyl transferase 3(predicted) OS=Triticum aestivum OX=4565 GN=TRAES_3BF096800100CFD_c1 PE=4 SV=1	TRAES_3BF096800100CFD_c1	27.2	46.415	53	10	1	0.934	0.103743
A0A077RX99	Secretion-regulating guanine nucleotide exchange factor(predicted) OS=Triticum aestivum OX=4565 GN=TRAES_3BF053800060CFD_c1 PE=4 SV=1	TRAES_3BF053800060CFD_c1	8.8	37.534	5	2	2	0.474	0.003221
A0A077RXS4	AAA domain-containing protein OS=Triticum aestivum OX=4565 GN=TRAES_3BF045700010CFD_c1 PE=3 SV=1	TRAES_3BF045700010CFD_c1	37.6	48.253	68	13	12	0.57	0.0166184
A0A077RY88	Metacaspase-1(predicted) OS=Triticum aestivum OX=4565 GN=TRAES_3BF053500090CFD_c1 PE=4 SV=1	TRAES_3BF053500090CFD_c1	33.4	39.47	4	9	1	1.627	0.036899
A0A077RYD6	Eukaryotic translation initiation factor 3 subunit L OS=Triticum aestivum OX=4565 GN=TRAES_3BF049800050CFD_c1 PE=3 SV=1	TRAES_3BF049800050CFD_c1	31.4	60.946	3	11	1	0.203	0.000162543
A0A077RYM5	Magnesium transporter OS=Triticum aestivum OX=4565 GN=TRAES_3BF079700080CFD_c1 PE=3 SV=1	TRAES_3BF079700080CFD_c1	5.1	49.127	1	2	1
A0A077RYX7	AA_TRNA_LIGASE_II domain-containing protein OS=Triticum aestivum OX=4565 GN=TRAES_3BF077200030CFD_c1 PE=3 SV=1	TRAES_3BF077200030CFD_c1	35.2	57.477	33	11	2	0.809	0.0022815
A0A077RZ13	GTP-binding protein SAR1A-like(predicted) OS=Triticum aestivum OX=4565 GN=TRAES_3BF077600090CFD_c1 PE=3 SV=1	TRAES_3BF077600090CFD_c1	65.3	21.941	39	8	6	0.787	0.046964
A0A077RZI5	PUR ALPHA-1(predicted) OS=Triticum aestivum OX=4565 GN=TRAES_3BF074200070CFD_c1 PE=4 SV=1	TRAES_3BF074200070CFD_c1	20.9	32.895	25	5	5	0.987	0.67184
A0A077RZK7	BHLH domain-containing protein OS=Triticum aestivum OX=4565 GN=TRAES_3BF001100060CFD_c1 PE=4 SV=1	TRAES_3BF001100060CFD_c1	6.6	39.422	8	2	2	0.998	0.97764
A0A077RZR5	FKS1_dom1 domain-containing protein OS=Triticum aestivum OX=4565 GN=TRAES_3BF046100040CFD_c1 PE=4 SV=1	TRAES_3BF046100040CFD_c1	7.5	207.05	3	11	1	0.296	0.000101852
A0A077RZT0	J domain-containing protein OS=Triticum aestivum OX=4565 GN=TRAES_3BF029300040CFD_c1 PE=4 SV=1	TRAES_3BF029300040CFD_c1	3.4	42.493	2	1	1	2.174	0.6812
A0A077S134	Non-specific serine/threonine protein kinase OS=Triticum aestivum OX=4565 GN=TRAES_3BF015700030CFD_c1 PE=4 SV=1	TRAES_3BF015700030CFD_c1	9.4	58.436	2	4	2	1.194	0.2245
A0A077S148	OBG-type G domain-containing protein OS=Triticum aestivum OX=4565 GN=TRAES_3BF042100040CFD_c1 PE=4 SV=1	TRAES_3BF042100040CFD_c1	30.8	44.521	39	9	9	0.825	0.100864
A0A077S1K0	UBIQUITIN_CONJUGAT_2 domain-containing protein OS=Triticum aestivum OX=4565 GN=TRAES_3BF112600010CFD_c1 PE=3 SV=1	TRAES_3BF112600010CFD_c1	29.6	18.989	11	3	1	2.003	0.029002
A0A077S3V2	Aspartate aminotransferase OS=Triticum aestivum OX=4565 GN=TRAES_3BF023000050CFD_c1 PE=4 SV=1	TRAES_3BF023000050CFD_c1	39	49.518	17	15	2	0.975	0.677
A0A077S4G0	S5 DRBM domain-containing protein OS=Triticum aestivum OX=4565 GN=TRAES_3BF004400020CFD_c1 PE=3 SV=1	TRAES_3BF004400020CFD_c1	34.2	30.355	38	10	0	1.203	0.25036
A0A077S547	PLATZ transcription factor (Fragment)(predicted) OS=Triticum aestivum OX=4565 GN=TRAES_3BF035900190CFD_c1 PE=4 SV=1	TRAES_3BF035900190CFD_c1	14.9	24.344	4	4	2	0.591	0.0041246
A0A077S712	U3 small nucleolar RNA-associated protein 11 OS=Triticum aestivum OX=4565 GN=TRAES_3BF027700160CFD_c1 PE=3 SV=1	TRAES_3BF027700160CFD_c1	29.1	27.493	36	6	1	0.817	0.029656
A0A077S7L9	Regulator of Vps4 activity in the MVB pathway protein(predicted) OS=Triticum aestivum OX=4565 GN=TRAES_3BF018900040CFD_c1 PE=4 SV=1	TRAES_3BF018900040CFD_c1	4.1	56.272	9	2	2	1.802	0.31544
A0A077S827	Putative ADP-ribosylation factor GTPase-activating protein AGD11(predicted) OS=Triticum aestivum OX=4565 GN=TRAES_3BF139100020CFD_c1 PE=4 SV=1	TRAES_3BF139100020CFD_c1	2.7	51.692	2	1	1
A0A080YTT7	Dehydration-responsive family protein-like(predicted) OS=Triticum aestivum OX=4565 GN=TRAES_3BF163900010CFD_c1 PE=4 SV=1	TRAES_3BF163900010CFD_c1	9.4	71.039	4	6	1	1.422	0.079864
A0A096UNF8	30S ribosomal protein S9(predicted) OS=Triticum aestivum OX=4565 GN=CAMPLR22A2D_LOCUS1179 PE=3 SV=1	CAMPLR22A2D_LOCUS1179	21.9	48.442	38	8	1	0.953	0.34284
A0A096URP1	Chlorophyll a-b binding protein, chloroplastic OS=Triticum aestivum OX=4565 PE=3 SV=1	---	32.2	30.785	34	6	6	1.014	0.8349
A0A096USR9	RNA helicase OS=Triticum aestivum OX=4565 GN=DEAD1-B PE=2 SV=1	DEAD1-B	52.8	67.058	9	24	1	0.59	0.00128315
A0A096UTL6	Caleosin OS=Triticum aestivum OX=4565 GN=Clo6 PE=2 SV=1	Clo6	9.8	22.801	5	2	1	1.537	0.149804
A0A0C4BIR6	Ribosomal_L16 domain-containing protein OS=Triticum aestivum OX=4565 PE=4 SV=1	---	38.8	24.731	62	8	6	0.882	0.20078
A0A0C4BIT2	Epimerase domain-containing protein OS=Triticum aestivum OX=4565 PE=4 SV=1	---	16.1	42.809	6	6	1	0.658	0.0163777
A0A0C4BIW4	40S ribosomal protein S14(predicted) OS=Triticum aestivum OX=4565 GN=CAMPLR22A2D_LOCUS2947 PE=3 SV=1	CAMPLR22A2D_LOCUS2947	71.5	16.319	78	10	5	0.69	0.032002
A0A0C4BJ32	cDNA clone:J033074L14, full insert sequence(predicted) OS=Triticum aestivum OX=4565 GN=CAMPLR22A2D_LOCUS1560 PE=4 SV=1	CAMPLR22A2D_LOCUS1560	10.1	19.343	6	2	2	1.375	0.041202
A0A0C4BJE5	Serine hydroxymethyltransferase OS=Triticum aestivum OX=4565 PE=3 SV=1	---	25.5	56.122	46	10	10	1.65	0.00041662
A0A0C4BK41	AAA domain-containing protein OS=Triticum aestivum OX=4565 PE=3 SV=1	---	43.9	47.638	73	16	5	0.924	0.46048
A0A0C4BK99	60S ribosomal protein L35a-3(predicted) OS=Triticum aestivum OX=4565 PE=3 SV=1	---	46.4	12.681	40	5	0	1.237	0.29732
A0A0C4BKI1	60S ribosomal protein L35a-1(predicted) OS=Triticum aestivum OX=4565 PE=3 SV=1	---	33.9	12.72	16	3	2	1.019	0.80528
A0A0E3Z7G8	Alpha-gliadin (Fragment) OS=Triticum aestivum OX=4565 GN=Gli-2 PE=4 SV=1	Gli-2	5.3	32.666	12	1	1	2.728	2.144e-05
A0A0F7J1N5	Hyperosmolality-gated Ca2+ permeable channel OS=Triticum aestivum OX=4565 GN=TaOSCA1.4 PE=2 SV=1	TaOSCA1.4	9.5	93.234	1	6	0	4.284	0.00162054
A0A0H2UIK3	MpV17 transgene-like(predicted) OS=Triticum aestivum OX=4565 PE=3 SV=1	---	10.6	25.014	3	1	1
A0A0K1YXN8	Non-specific serine/threonine protein kinase OS=Triticum aestivum OX=4565 PE=2 SV=1	---	15.8	56.961	19	7	2	1.046	0.100478
A0A0R6UPC9	CslF6 OS=Triticum aestivum OX=4565 PE=2 SV=1	---	23.5	105.02	79	18	2	1.447	4.3285e-05
A0A172Q4F7	Nicotianamine synthase OS=Triticum aestivum OX=4565 GN=NAS9-D PE=4 SV=1	NAS9-D	15.3	36.038	27	6	6	0.672	0.096782
A0A172Q4G1	Nicotianamine synthase OS=Triticum aestivum OX=4565 GN=NAS6-B PE=4 SV=1	NAS6-B	20.3	35.455	13	4	4
A0A172Q4G4	Nicotianamine synthase OS=Triticum aestivum OX=4565 GN=NAS1-A PE=4 SV=1	NAS1-A	5	30.078	4	1	1	0.245	0.00046425
A0A1B5GFV1	Caleosin OS=Triticum aestivum OX=4565 GN=Clo6 PE=2 SV=1	Clo6	18	22.643	11	4	3	1.509	0.0125963
A0A1B5GFV6	Caleosin OS=Triticum aestivum OX=4565 GN=Clo10 PE=2 SV=1	Clo10	14	27.423	13	3	0	0.459	0.0147174
A0A1D5RS51	Chlorophyll a-b binding protein, chloroplastic OS=Triticum aestivum OX=4565 PE=3 SV=1	---	29.7	28.198	4	6	0
A0A1D5RU47	Nucleosome assembly protein 1-like 1(predicted) OS=Triticum aestivum OX=4565 PE=3 SV=1	---	13.1	41.748	22	5	4	1.239	0.103937
A0A1D5RWZ6	Nicotianamine aminotransferase 2 OS=Triticum aestivum OX=4565 GN=NAAT2-A PE=4 SV=1	NAAT2-A	6.5	51.269	5	2	2	1.286	0.48836
A0A1D5S2C7	Uncharacterized protein OS=Triticum aestivum OX=4565 GN=CAMPLR22A2D_LOCUS5505 PE=4 SV=1	CAMPLR22A2D_LOCUS5505	5	32.41	10	1	1	2.172	0.000159915
A0A1D5SB94	Ras-related protein Rab7(predicted) OS=Triticum aestivum OX=4565 PE=4 SV=1	---	50.5	22.927	34	9	1	0.714	0.00067642
A0A1D5SG47	Ras-related protein RABE1c(predicted) OS=Triticum aestivum OX=4565 PE=4 SV=1	---	18.7	23.673	18	4	1	0.675	0.20386
A0A1D5SGL2	Flavodoxin-like domain-containing protein OS=Triticum aestivum OX=4565 PE=4 SV=1	---	33.3	21.782	14	4	4	0.597	0.00032322
A0A1D5SLF7	Nucleic acid-binding OB-fold-like protein(predicted) OS=Triticum aestivum OX=4565 PE=4 SV=1	---	50.4	14.015	70	5	1	0.749	0.0048972
A0A1D5SLI4	40S ribosomal protein S4 OS=Triticum aestivum OX=4565 PE=3 SV=1	---	62.6	29.95	191	18	18	1.006	0.96286
A0A1D5SRA5	Coatomer subunit gamma OS=Triticum aestivum OX=4565 PE=3 SV=1	---	30.5	98.72	3	20	1	0.053	1.6545e-06
A0A1D5SS06	MHD domain-containing protein OS=Triticum aestivum OX=4565 PE=3 SV=1	---	14.8	43.578	30	5	5	0.861	0.32264
A0A1D5SSE6	Guanosine nucleotide diphosphate dissociation inhibitor OS=Triticum aestivum OX=4565 PE=3 SV=1	---	21.6	46.699	19	8	0	1.218	0.0022552
A0A1D5TC50	Casein kinase II subunit beta OS=Triticum aestivum OX=4565 PE=3 SV=1	---	12.3	27.837	9	2	2	0.53	0.22604
A0A1D5THS1	60S ribosomal protein L34(predicted) OS=Triticum aestivum OX=4565 GN=CAMPLR22A2D_LOCUS3258 PE=4 SV=1	CAMPLR22A2D_LOCUS3258	30.3	13.845	23	3	1	1.388	0.000136223
A0A1D5TKM2	Eukaryotic translation initiation factor 5A OS=Triticum aestivum OX=4565 GN=CAMPLR22A2D_LOCUS1713 PE=3 SV=1	CAMPLR22A2D_LOCUS1713	18.1	17.344	12	2	1	1.923	0.0281
A0A1D5TPB6	Ribosomal protein L19 OS=Triticum aestivum OX=4565 PE=3 SV=1	---	28.7	24.26	41	5	1	0.801	0.22314
A0A1D5TTT2	Glyceraldehyde-3-phosphate dehydrogenase OS=Triticum aestivum OX=4565 PE=3 SV=1	---	28.7	42.699	38	9	1	0.64	0.050479
A0A1D5U586	wound-induced basic protein(predicted) OS=Triticum aestivum OX=4565 PE=4 SV=1	---	22.9	5.6053	3	1	1	0.763	0.164416
A0A1D5U807	Ribosomal protein L19 OS=Triticum aestivum OX=4565 PE=3 SV=1	---	28.4	24.453	6	5	1	1.078	0.7821
A0A1D5UDU1	PlsC domain-containing protein OS=Triticum aestivum OX=4565 PE=4 SV=1	---	8.6	31.25	11	2	2	1.134	0.91576
A0A1D5UH21	PUM-HD domain-containing protein OS=Triticum aestivum OX=4565 GN=CAMPLR22A2D_LOCUS4288 PE=4 SV=1	CAMPLR22A2D_LOCUS4288	2.1	62.948	1	1	1	0.931	0.6883
A0A1D5UH45	Aldose 1-epimerase OS=Triticum aestivum OX=4565 GN=CAMPLR22A2D_LOCUS3238 PE=3 SV=1	CAMPLR22A2D_LOCUS3238	19.4	39.756	24	4	2	0.811	0.29768
A0A1D5UHB3	SWI/SNF complex subunit SWI3A(predicted) OS=Triticum aestivum OX=4565 GN=CAMPLR22A2D_LOCUS3386 PE=4 SV=1	CAMPLR22A2D_LOCUS3386	7.7	61.162	14	4	4	1.97	0.039298
A0A1D5UHY0	RNAC1 transcription factor OS=Triticum aestivum OX=4565 GN=CAMPLR22A2D_LOCUS3267 PE=2 SV=1	CAMPLR22A2D_LOCUS3267	4.8	38.075	1	1	1	1.54	0.0160839
A0A1D5UIJ5	Aldedh domain-containing protein OS=Triticum aestivum OX=4565 GN=CAMPLR22A2D_LOCUS3288 PE=3 SV=1	CAMPLR22A2D_LOCUS3288	14	54.602	6	5	0	0.582	0.0053232
A0A1D5UK41	Calcium-dependent protein kinase(predicted) OS=Triticum aestivum OX=4565 GN=CAMPLR22A2D_LOCUS4557 PE=4 SV=1	CAMPLR22A2D_LOCUS4557	3.1	61.393	1	1	1	0.903	0.101244
A0A1D5UKJ3	Phosphate carrier protein, mitochondrial(predicted) OS=Triticum aestivum OX=4565 GN=CAMPLR22A2D_LOCUS3168 PE=3 SV=1	CAMPLR22A2D_LOCUS3168	16	38.725	3	5	1
A0A1D5UKN6	LEA_2 domain-containing protein OS=Triticum aestivum OX=4565 GN=CAMPLR22A2D_LOCUS3034 PE=4 SV=1	CAMPLR22A2D_LOCUS3034	8.1	35.308	7	2	2	1.506	0.075123
A0A1D5ULT3	H15 domain-containing protein OS=Triticum aestivum OX=4565 GN=CAMPLR22A2D_LOCUS3974 PE=3 SV=1	CAMPLR22A2D_LOCUS3974	32.1	19.332	79	7	2	2.234	0.00080215
A0A1D5UM77	Nuclear pore complex protein NUP88(predicted) OS=Triticum aestivum OX=4565 GN=CAMPLR22A2D_LOCUS4302 PE=4 SV=1	CAMPLR22A2D_LOCUS4302	6.4	92.949	16	4	4	1.168	0.69398
A0A1D5UNI3	Cell wall invertase(predicted) OS=Triticum aestivum OX=4565 GN=CAMPLR22A2D_LOCUS2946 PE=3 SV=1	CAMPLR22A2D_LOCUS2946	33.4	69.307	6	18	1	1.302	0.0107754
A0A1D5UNY7	Vacuolar processing enzyme 2c(predicted) OS=Triticum aestivum OX=4565 GN=CAMPLR22A2D_LOCUS3843 PE=4 SV=1	CAMPLR22A2D_LOCUS3843	17.4	53.856	24	7	4	1.605	0.0130016
A0A1D5UPJ6	Pyruvate kinase OS=Triticum aestivum OX=4565 GN=CAMPLR22A2D_LOCUS5537 PE=3 SV=1	CAMPLR22A2D_LOCUS5537	33.3	55.431	89	14	2	1.541	0.027698
A0A1D5UQF7	Aquaporin(predicted) OS=Triticum aestivum OX=4565 GN=CAMPLR22A2D_LOCUS3784 PE=3 SV=1	CAMPLR22A2D_LOCUS3784	12.1	30.42	1	3	1	1.603	0.0063619
A0A1D5UQZ5	Ribosomal_L23eN domain-containing protein OS=Triticum aestivum OX=4565 GN=CAMPLR22A2D_LOCUS3567 PE=3 SV=1	CAMPLR22A2D_LOCUS3567	41.4	16.881	65	10	10	0.968	0.73658
A0A1D5URK7	VPE1(predicted) OS=Triticum aestivum OX=4565 GN=CAMPLR22A2D_LOCUS3841 PE=4 SV=1	CAMPLR22A2D_LOCUS3841	8.1	54.553	9	4	1	1.312	0.0132031
A0A1D5URR5	Oxidored_FMN domain-containing protein OS=Triticum aestivum OX=4565 GN=CAMPLR22A2D_LOCUS3112 PE=4 SV=1	CAMPLR22A2D_LOCUS3112	19.7	41.102	26	6	2	0.777	0.00024075
A0A1D5US01	Uncharacterized protein OS=Triticum aestivum OX=4565 GN=CAMPLR22A2D_LOCUS5817 PE=4 SV=1	CAMPLR22A2D_LOCUS5817	12.1	10.969	3	1	1	0.241	0.0038385
A0A1D5USE2	Cytochrome P450 86A22(predicted) OS=Triticum aestivum OX=4565 GN=CAMPLR22A2D_LOCUS4075 PE=3 SV=1	CAMPLR22A2D_LOCUS4075	31.2	58.696	7	12	1	1.34	0.04668
A0A1D5UT08	SWIB domain-containing protein OS=Triticum aestivum OX=4565 GN=CAMPLR22A2D_LOCUS2802 PE=4 SV=1	CAMPLR22A2D_LOCUS2802	14.5	57.425	22	6	6	1.274	0.160199
A0A1D5UV66	RuBisCO large subunit-binding protein subunit alpha, chloroplastic(predicted) OS=Triticum aestivum OX=4565 GN=CAMPLR22A2D_LOCUS410 PE=3 SV=1	CAMPLR22A2D_LOCUS410	4.3	61.367	6	2	2	1.638	0.33692
A0A1D5UWN7	Phospho-2-dehydro-3-deoxyheptonate aldolase OS=Triticum aestivum OX=4565 GN=CAMPLR22A2D_LOCUS1520 PE=3 SV=1	CAMPLR22A2D_LOCUS1520	39.1	58.683	77	17	4	1.566	0.029265
A0A1D5UXG3	Protein kinase domain-containing protein OS=Triticum aestivum OX=4565 GN=CAMPLR22A2D_LOCUS2215 PE=3 SV=1	CAMPLR22A2D_LOCUS2215	1.6	134.04	7	2	2	1.08	0.52774
A0A1D5UXN7	Amine oxidase OS=Triticum aestivum OX=4565 GN=CAMPLR22A2D_LOCUS627 PE=3 SV=1	CAMPLR22A2D_LOCUS627	7.5	81.117	6	3	1	1.599	0.00024354
A0A1D5UYI9	Protein kinase domain-containing protein OS=Triticum aestivum OX=4565 GN=CAMPLR22A2D_LOCUS914 PE=4 SV=1	CAMPLR22A2D_LOCUS914	4.9	69.333	2	2	2	1.82	0.020485
A0A1D5UZA1	PKS_KS domain-containing protein OS=Triticum aestivum OX=4565 GN=CAMPLR22A2D_LOCUS1581 PE=3 SV=1	CAMPLR22A2D_LOCUS1581	3.9	52.828	5	2	1	1.255	0.00067726
A0A1D5UZW7	Elongation factor 1-alpha OS=Triticum aestivum OX=4565 PE=3 SV=1	---	55	49.127	76	21	5	1.543	0.099501
A0A1D5V0W9	Str_synth domain-containing protein OS=Triticum aestivum OX=4565 GN=CAMPLR22A2D_LOCUS1601 PE=4 SV=1	CAMPLR22A2D_LOCUS1601	3.8	38.965	3	1	1	0.474	0.0099978
A0A1D5V110	FAS1 domain-containing protein OS=Triticum aestivum OX=4565 GN=CAMPLR22A2D_LOCUS1540 PE=4 SV=1	CAMPLR22A2D_LOCUS1540	6.1	36.614	6	2	2	1.33	0.00073962
A0A1D5V1G5	Chlorophyll a-b binding protein, chloroplastic OS=Triticum aestivum OX=4565 GN=CAMPLR22A2D_LOCUS1931 PE=3 SV=1	CAMPLR22A2D_LOCUS1931	16.1	31.102	32	5	3	0.725	0.0105425
A0A1D5V1M6	Neprosin domain-containing protein OS=Triticum aestivum OX=4565 GN=CAMPLR22A2D_LOCUS1224 PE=4 SV=1	CAMPLR22A2D_LOCUS1224	23.9	34.689	19	4	4	0.598	0.176497
A0A1D5V2P4	Putative glycosyltransferase STELLO1(predicted) OS=Triticum aestivum OX=4565 GN=CAMPLR22A2D_LOCUS1201 PE=4 SV=1	CAMPLR22A2D_LOCUS1201	12.1	82.054	21	7	7	0.829	0.0463
A0A1D5V2S8	Dirigent protein OS=Triticum aestivum OX=4565 GN=CAMPLR22A2D_LOCUS1575 PE=3 SV=1	CAMPLR22A2D_LOCUS1575	12	19.692	12	2	2	1.384	0.023698
A0A1D5V2W7	Dihydrolipoamide acetyltransferase component of pyruvate dehydrogenase complex OS=Triticum aestivum OX=4565 GN=CAMPLR22A2D_LOCUS610 PE=3 SV=1	CAMPLR22A2D_LOCUS610	23.4	55.185	54	9	1	0.821	0.062757
A0A1D5V307	AHM2 (Fragment)(predicted) OS=Triticum aestivum OX=4565 GN=CAMPLR22A2D_LOCUS624 PE=4 SV=1	CAMPLR22A2D_LOCUS624	6.6	67.874	5	3	1	1.043	0.8338
A0A1D5V3A3	PMEI domain-containing protein OS=Triticum aestivum OX=4565 GN=CAMPLR22A2D_LOCUS306 PE=4 SV=1	CAMPLR22A2D_LOCUS306	24.4	21.776	3	5	1
A0A1D5VD11	Fructose-bisphosphate aldolase OS=Triticum aestivum OX=4565 GN=FBA11 PE=3 SV=1	FBA11	42.5	38.908	11	11	1	0.9	0.038699
A0A1D5VE13	Fructose-bisphosphate aldolase OS=Triticum aestivum OX=4565 GN=FBA10 PE=3 SV=1	FBA10	49.7	38.81	27	12	0	0.913	0.062318
A0A1D5VIV1	Argonaute 4 OS=Triticum aestivum OX=4565 GN=AGO4 PE=2 SV=1	AGO4	25.3	101.9	3	19	1
A0A1D5VQ90	Secretory carrier-associated membrane protein OS=Triticum aestivum OX=4565 PE=3 SV=1	---	4.2	32.214	5	1	1	1.23
A0A1D5W6Q2	60S ribosomal protein L38(predicted) OS=Triticum aestivum OX=4565 PE=3 SV=1	---	53.6	8.0965	39	3	3	0.577	0.00040155
A0A1D5W7I4	Ribosomal protein OS=Triticum aestivum OX=4565 PE=3 SV=1	---	22.7	24.633	14	6	3	0.74	0.0155794
A0A1D5W7M9	Ras-related protein RIC1(predicted) OS=Triticum aestivum OX=4565 PE=4 SV=1	---	27.6	22.503	11	4	1	0.222	0.00045507
A0A1D5W9E8	Oxidored_q6 domain-containing protein OS=Triticum aestivum OX=4565 PE=3 SV=1	---	24.8	22.059	36	6	6	1.067	0.34164
A0A1D5WIS4	Fructose-bisphosphate aldolase OS=Triticum aestivum OX=4565 GN=FBA15 PE=3 SV=1	FBA15	49.7	38.782	70	12	2	1.898	0.00044034
A0A1D5WJD9	3'-5' exonuclease domain-containing protein OS=Triticum aestivum OX=4565 PE=4 SV=1	---	6.7	28.471	2	1	1	1.099	0.63858
A0A1D5WMF1	Fructose-bisphosphate aldolase OS=Triticum aestivum OX=4565 GN=FBA14 PE=3 SV=1	FBA14	51.7	38.796	2	12	1	1.203	0.134776
A0A1D5WVM8	Carboxypeptidase OS=Triticum aestivum OX=4565 GN=GS5 PE=2 SV=1	GS5	12.3	54.275	12	4	4	0.986	0.96582
A0A1D5X2E0	Protein transport protein Sec61 subunit beta OS=Triticum aestivum OX=4565 PE=3 SV=1	---	50.5	11.031	11	3	3	0.258	0.21164
A0A1D5X5C6	Actin-3(predicted) OS=Triticum aestivum OX=4565 PE=3 SV=1	---	51.7	41.62	7	13	0	0.057	0.00020065
A0A1D5XDB6	Elongation factor 1-alpha OS=Triticum aestivum OX=4565 PE=3 SV=1	---	60.4	49.14	464	24	1	1.17	0.079759
A0A1D5XT96	ATP-citrate synthase(predicted) OS=Triticum aestivum OX=4565 PE=4 SV=1	---	20.2	45.177	27	5	3	1.026	0.674
A0A1D5Y7B6	Formate dehydrogenase, mitochondrial OS=Triticum aestivum OX=4565 PE=3 SV=1	---	32.1	39.531	6	11	1	0.85	0.172422
A0A1D5YA13	H/ACA ribonucleoprotein complex subunit OS=Triticum aestivum OX=4565 PE=3 SV=1	---	27.2	17.191	16	3	3	0.342	0.00029895
A0A1D5YA18	Cytochrome c oxidase assembly protein ctaG(predicted) OS=Triticum aestivum OX=4565 PE=3 SV=1	---	5.6	25.9	5	1	1	1.608	0.0150017
A0A1D5YJJ4	acidPPc domain-containing protein OS=Triticum aestivum OX=4565 PE=4 SV=1	---	3.7	32.741	2	1	1	1.325	0.056297
A0A1D5YKH2	Histone H2A OS=Triticum aestivum OX=4565 PE=3 SV=1	---	29.2	14.487	73	4	3	2.551	3.6873e-05
A0A1D5YNP5	Small nuclear ribonucleoprotein Sm D3 OS=Triticum aestivum OX=4565 PE=3 SV=1	---	25.2	14.506	28	3	3	1.064	0.62942
A0A1D5YVB5	Cytochrome c oxidase subunit 5C OS=Triticum aestivum OX=4565 PE=3 SV=1	---	12.7	7.0262	2	1	1	7.01
A0A1D5YYZ5	Putidaredoxin(predicted) OS=Triticum aestivum OX=4565 PE=4 SV=1	---	28.8	17.175	22	5	5	0.938	0.088225
A0A1D5Z340	Ribosomal_L7Ae domain-containing protein OS=Triticum aestivum OX=4565 PE=4 SV=1	---	42.5	29.409	115	15	2	1.404	0.0066752
A0A1D5ZBB4	Putative vesicle-associated membrane protein 726(predicted) OS=Triticum aestivum OX=4565 PE=3 SV=1	---	15.8	24.965	18	3	3	0.774	0.3099
A0A1D5ZLT8	ADF-H domain-containing protein OS=Triticum aestivum OX=4565 PE=3 SV=1	---	11.6	16.084	3	1	1
A0A1D5ZPS0	GXM1 OS=Triticum aestivum OX=4565 GN=GXM1 PE=2 SV=1	GXM1	12.4	31.972	1	3	1	0.944
A0A1D5ZQU3	AP complex subunit sigma OS=Triticum aestivum OX=4565 PE=3 SV=1	---	8.1	18.648	6	1	1	1.329	0.21596
A0A1D6B0F9	Protein LURP1(predicted) OS=Triticum aestivum OX=4565 PE=4 SV=1	---	14.2	22.38	15	3	3	1.058	0.2676
A0A1D6B1J8	NDR1/HIN1-like protein 10(predicted) OS=Triticum aestivum OX=4565 PE=4 SV=1	---	5	23.57	3	1	1	0.301	9.734e-05
A0A1D6B308	S-adenosylmethionine synthase OS=Triticum aestivum OX=4565 PE=3 SV=1	---	42.6	42.765	1	12	1
A0A1D6BC85	Ribosomal protein L37 OS=Triticum aestivum OX=4565 PE=3 SV=1	---	9.7	10.737	6	2	2	3.71	0.061662
A0A1D6BGN0	MADS-box transcription factor 29(predicted) OS=Triticum aestivum OX=4565 PE=4 SV=1	---	19	28.256	34	5	5	1.108	0.027558
A0A1D6BIN9	Protein mago nashi-like protein(predicted) OS=Triticum aestivum OX=4565 PE=4 SV=1	---	33.7	18.615	39	7	7	0.754	0.0037633
A0A1D6BJ11	Cinnamyl alcohol dehydrogenase 12 OS=Triticum aestivum OX=4565 GN=CAD12 PE=2 SV=1	CAD12	24.5	39.437	37	7	5	1.003	0.9744
A0A1D6BQY9	Tubulin beta chain OS=Triticum aestivum OX=4565 PE=3 SV=1	---	53.8	50.21	211	20	3	0.887	0.042065
A0A1D6BYQ7	AAA domain-containing protein OS=Triticum aestivum OX=4565 PE=3 SV=1	---	38	47.652	10	14	3	1.492	0.00117969
A0A1D6BZ35	Brix domain-containing protein OS=Triticum aestivum OX=4565 PE=4 SV=1	---	31.7	41.66	52	9	9	1.325	0.026962
A0A1D6CGH8	Histone H3 OS=Triticum aestivum OX=4565 PE=3 SV=1	---	60.3	15.302	277	11	1	1.84	0.00189843
A0A1D6CJP6	Histone H3 OS=Triticum aestivum OX=4565 PE=3 SV=1	---	57.4	15.27	8	9	0	1.525	0.0030807
A0A1D6CQ74	NADH dehydrogenase [ubiquinone] 1 beta subcomplex subunit 9(predicted) OS=Triticum aestivum OX=4565 PE=3 SV=1	---	33.3	13.369	12	3	3	0.619	0.153183
A0A1D6CTY7	Succinate dehydrogenase subunit 6, mitochondrial(predicted) OS=Triticum aestivum OX=4565 PE=4 SV=1	---	12.1	15.727	4	2	2	1.122	0.4025
A0A1D6CXF2	Proteasome subunit alpha type OS=Triticum aestivum OX=4565 PE=3 SV=1	---	31.7	27.335	27	7	7	1.13	0.136302
A0A1D6CXJ5	T-complex protein 1 subunit delta OS=Triticum aestivum OX=4565 PE=3 SV=1	---	29.2	57.466	46	14	14	0.936	0.26104
A0A1D6D1Q3	Pyrophosphate--fructose 6-phosphate 1-phosphotransferase subunit beta OS=Triticum aestivum OX=4565 GN=PFP-BETA PE=3 SV=1	PFP-BETA	45	60.557	109	20	1	0.828	0.01246
A0A1D6D9Q7	DEAD-box ATP-dependent RNA helicase 53(predicted) OS=Triticum aestivum OX=4565 GN=CAMPLR22A2D_LOCUS2504 PE=4 SV=1	CAMPLR22A2D_LOCUS2504	20.4	67.325	61	10	0	1.1	0.096144
A0A1D6DJ20	Actin(predicted) OS=Triticum aestivum OX=4565 PE=3 SV=1	---	52.8	41.792	21	13	0	1.252	0.497
A0A1D6RD10	Tubulin alpha chain OS=Triticum aestivum OX=4565 PE=3 SV=1	---	52.3	47.237	351	20	0	0.747	7.5407e-05
A0A1D6RH06	CULLIN_2 domain-containing protein OS=Triticum aestivum OX=4565 PE=3 SV=1	---	19.5	86.116	35	12	8	0.99	0.88602
A0A1D6RPC5	U3 small nucleolar RNA-associated protein 6-like protein(predicted) OS=Triticum aestivum OX=4565 GN=CAMPLR22A2D_LOCUS2610 PE=4 SV=1	CAMPLR22A2D_LOCUS2610	14	78.05	18	10	4	0.845	0.030885
A0A1D6RPT8	E3 ubiquitin-protein ligase SHPRH(predicted) OS=Triticum aestivum OX=4565 GN=CAMPLR22A2D_LOCUS918 PE=4 SV=1	CAMPLR22A2D_LOCUS918	2.8	186.09	8	4	4	0.606	0.0034776
A0A1D6RPZ0	S1 motif domain-containing protein OS=Triticum aestivum OX=4565 GN=CAMPLR22A2D_LOCUS735 PE=4 SV=1	CAMPLR22A2D_LOCUS735	17.7	37.88	42	8	4	0.956	0.45228
A0A1D6S518	UTP--glucose-1-phosphate uridylyltransferase OS=Triticum aestivum OX=4565 PE=3 SV=1	---	46.3	51.664	4	18	1	1.314	0.00056396
A0A1D6SCP9	Sucrose synthase OS=Triticum aestivum OX=4565 PE=3 SV=1	---	24.5	92.634	1	23	1	0.257	0.0102414
A0A1D6SDJ6	Expressed protein(predicted) OS=Triticum aestivum OX=4565 PE=4 SV=1	---	41.7	39.794	58	12	10	1.199	0.0068576
A0A1D6SDQ8	Zinc finger and BTB domain-containing protein 11 isoform 1(predicted) OS=Triticum aestivum OX=4565 PE=4 SV=1	---	11.2	16.615	1	1	1	0.522	0.002763
A0A1K0JNG6	Alpha-gliadin OS=Triticum aestivum OX=4565 GN=Gli-D2-15 PE=4 SV=1	Gli-D2-15	7.5	35.47	18	1	1	0.873	0.187762
A0A2P1E8S5	Fructose-bisphosphate aldolase OS=Triticum aestivum OX=4565 GN=FBA16 PE=3 SV=1	FBA16	42.5	38.878	11	11	1	1.44	0.024475
A0A2U8JD37	Delta gliadin-D1 OS=Triticum aestivum OX=4565 GN=Gli-1 PE=4 SV=1	Gli-1	23.8	37.662	21	4	4	1.218	0.118997
A0A2X0S4F1	Chloroplast-localized Ptr ToxA-binding protein1(predicted) OS=Triticum aestivum OX=4565 GN=CAMPLR22A2D_LOCUS1932 PE=3 SV=1	CAMPLR22A2D_LOCUS1932	19.6	32.322	12	4	4	1.221	0.44526
A0A2X0S855	Polyadenylate-binding protein OS=Triticum aestivum OX=4565 GN=CAMPLR22A2D_LOCUS3604 PE=3 SV=1	CAMPLR22A2D_LOCUS3604	30.7	72.421	80	16	16	1.285	0.0182795
A0A2X0SD55	Dolichyl-diphosphooligosaccharide--protein glycosyltransferase subunit STT3B(predicted) OS=Triticum aestivum OX=4565 GN=CAMPLR22A2D_LOCUS5508 PE=4 SV=1	CAMPLR22A2D_LOCUS5508	10.5	81.123	6	7	1	0.617	0.0052176
A0A2X0SLI3	40S ribosomal protein S6 OS=Triticum aestivum OX=4565 GN=CAMPLR22A2D_LOCUS1521 PE=3 SV=1	CAMPLR22A2D_LOCUS1521	26	28.422	22	8	3	1.116	0.44412
A0A2X0SLS2	Oleosin OS=Triticum aestivum OX=4565 GN=CAMPLR22A2D_LOCUS4168 PE=3 SV=1	CAMPLR22A2D_LOCUS4168	14.4	16.321	7	3	1	1.684	0.174637
A0A2X0TL33	E3 ubiquitin-protein ligase TRIM33(predicted) OS=Triticum aestivum OX=4565 GN=CAMPLR22A2D_LOCUS2308 PE=4 SV=1	CAMPLR22A2D_LOCUS2308	2.7	163.56	5	3	3	1.769	0.043161
A0A2X0TRX7	MI domain-containing protein OS=Triticum aestivum OX=4565 GN=CAMPLR22A2D_LOCUS1992 PE=4 SV=1	CAMPLR22A2D_LOCUS1992	5.4	203.29	27	7	7	1.146	0.127477
A0A2X0TSA2	SAM_MT_TRM5_TYW2 domain-containing protein OS=Triticum aestivum OX=4565 GN=CAMPLR22A2D_LOCUS2143 PE=4 SV=1	CAMPLR22A2D_LOCUS2143	5.3	119.21	18	5	5	0.923	0.33798
A0A341P0J7	Ribosomal_L18e/L15P domain-containing protein OS=Triticum aestivum OX=4565 PE=4 SV=1	---	41.2	21.161	6	8	0	0.287	0.0072601
A0A341P3K0	Importin N-terminal domain-containing protein OS=Triticum aestivum OX=4565 PE=4 SV=1	---	19.6	95.665	38	11	9	0.435	0.008682
A0A341PC84	PHB domain-containing protein OS=Triticum aestivum OX=4565 PE=4 SV=1	---	28.2	27.37	26	5	4	0.786	0.38894
A0A341PIP8	2-oxoglutarate/malate translocator(predicted) OS=Triticum aestivum OX=4565 PE=3 SV=1	---	37.1	32.359	56	10	7	1.361	0.023441
A0A341Q2H7	PsbP domain-containing protein OS=Triticum aestivum OX=4565 PE=4 SV=1	---	23.4	22.444	26	5	5	1.307	0.076282
A0A341Q321	Glyco_transf_28 domain-containing protein OS=Triticum aestivum OX=4565 PE=4 SV=1	---	4.2	41.958	5	1	1	0.693	0.00141738
A0A341Q3A7	FMN hydroxy acid dehydrogenase domain-containing protein OS=Triticum aestivum OX=4565 PE=3 SV=1	---	9.4	37.238	3	3	1	1.125	0.37876
A0A341QMC1	ATP synthase subunit(predicted) OS=Triticum aestivum OX=4565 PE=3 SV=1	---	21.2	39.751	31	6	6	0.837	0.056679
A0A341R0L4	MPN domain-containing protein OS=Triticum aestivum OX=4565 PE=4 SV=1	---	10.7	34.427	8	3	3	1.132	0.56826
A0A341RG58	UMP-CMP kinase OS=Triticum aestivum OX=4565 PE=3 SV=1	---	36.5	18.532	10	5	5	0.866	0.39546
A0A341RNA0	14_3_3 domain-containing protein OS=Triticum aestivum OX=4565 PE=3 SV=1	---	26.3	21.94	11	5	1	0.969	0.2219
A0A341SFG0	Protein kinase domain-containing protein OS=Triticum aestivum OX=4565 PE=4 SV=1	---	25.1	44.895	1	7	1	0.727	0.128803
A0A341TM85	Uncharacterized protein OS=Triticum aestivum OX=4565 PE=4 SV=1	---	9.2	55.417	15	4	4	1.16	0.096937
A0A341U4I1	Protein transport protein SEC23 OS=Triticum aestivum OX=4565 PE=3 SV=1	---	19.2	79.241	61	11	11	0.83	0.0091157
A0A341U9I2	30S ribosomal protein S2, chloroplastic(predicted) OS=Triticum aestivum OX=4565 PE=3 SV=1	---	12.1	23.358	3	2	2	2.761	0.0022027
A0A341UGW3	W2 domain-containing protein OS=Triticum aestivum OX=4565 PE=4 SV=1	---	27.7	46.551	2	10	1	0.911	0.2015
A0A341UK78	Glucose-6-phosphate 1-dehydrogenase(predicted) OS=Triticum aestivum OX=4565 PE=4 SV=1	---	6.7	33.337	8	2	2	1.02	0.57074
A0A341UMH5	Plug_translocon domain-containing protein OS=Triticum aestivum OX=4565 PE=3 SV=1	---	5.4	48.946	6	2	1	0.8	0.135559
A0A341WZG6	Small nuclear ribonucleoprotein Sm D1 OS=Triticum aestivum OX=4565 PE=3 SV=1	---	22.4	11.81	18	3	2	0.809	0.017282
A0A341XET4	H/ACA ribonucleoprotein complex subunit 3-like protein(predicted) OS=Triticum aestivum OX=4565 PE=4 SV=1	---	60.9	7.5376	34	5	5	0.997	0.9165
A0A341XG20	Protein kinase domain-containing protein OS=Triticum aestivum OX=4565 PE=3 SV=1	---	8	49.586	5	3	3	1.226	0.0020242
A0A341XPQ3	RACB protein(predicted) OS=Triticum aestivum OX=4565 PE=4 SV=1	---	22.5	18.887	4	2	2	0.609	0.0076573
A0A341XZK6	60S ribosomal protein L27 OS=Triticum aestivum OX=4565 PE=3 SV=1	---	31.4	15.578	6	4	2	0.051
A0A341YEF9	Histone H2B OS=Triticum aestivum OX=4565 PE=3 SV=1	---	93.9	7.2423	37	10	2	0.501	0.0020037
A0A341YEW4	Chlorophyll a-b binding protein, chloroplastic OS=Triticum aestivum OX=4565 PE=3 SV=1	---	21.2	26.464	10	4	4	0.636	0.00072405
A0A341YHS5	Serine/threonine-protein phosphatase OS=Triticum aestivum OX=4565 PE=3 SV=1	---	19	36.097	8	5	5	0.774	0.29144
A0A341YJJ6	Peptidase A1 domain-containing protein OS=Triticum aestivum OX=4565 PE=3 SV=1	---	10.7	50.138	10	4	4	0.613	0.168625
A0A341ZA80	Clathrin light chain OS=Triticum aestivum OX=4565 PE=4 SV=1	---	26.4	22.314	36	5	5	0.784	0.053763
A0A341ZCF5	Histone H2B OS=Triticum aestivum OX=4565 PE=3 SV=1	---	55.4	15.995	6	11	1	130.326	4.7609e-07
A0A341ZEZ4	Alpha-amylase/subtilisin inhibitor(predicted) OS=Triticum aestivum OX=4565 PE=4 SV=1	---	20.9	25.717	14	4	3	0.873	0.084658
A0A3B5XSU1	Nucleic acid-binding OB-fold-like protein(predicted) OS=Triticum aestivum OX=4565 PE=4 SV=1	---	50.4	14.017	15	5	1	0.5	0.00023675
A0A3B5XSX8	CNH domain-containing protein OS=Triticum aestivum OX=4565 PE=4 SV=1	---	11.4	103.7	22	7	2	0.609	0.0033578
A0A3B5XT84	E3 ubiquitin-protein ligase UHRF2(predicted) OS=Triticum aestivum OX=4565 PE=4 SV=1	---	13.8	85.533	43	10	10	1.678	0.00056069
A0A3B5XT89	Neprosin domain-containing protein OS=Triticum aestivum OX=4565 PE=4 SV=1	---	5.9	28.908	2	1	1
A0A3B5XT95	Ras-related protein RABD1(predicted) OS=Triticum aestivum OX=4565 PE=4 SV=1	---	10.2	22.905	7	2	1	0.755	0.0025153
A0A3B5XT99	AAI domain-containing protein OS=Triticum aestivum OX=4565 PE=4 SV=1	---	13.2	36.606	32	3	3	0.722	0.099999
A0A3B5XTA4	AAI domain-containing protein OS=Triticum aestivum OX=4565 PE=4 SV=1	---	33	22.215	49	3	1	1.265	0.075258
A0A3B5XTS0	DUF383 domain-containing protein OS=Triticum aestivum OX=4565 PE=4 SV=1	---	4	35.051	6	1	1	1.132	0.21214
A0A3B5XU12	RING-type domain-containing protein OS=Triticum aestivum OX=4565 PE=4 SV=1	---	3.2	42.116	3	1	1	0.599	0.2381
A0A3B5XU15	Amino acid selective channel protein(predicted) OS=Triticum aestivum OX=4565 PE=4 SV=1	---	52.1	15.034	37	7	2	0.942	0.51764
A0A3B5XU88	HMG box-containing protein 4(predicted) OS=Triticum aestivum OX=4565 PE=4 SV=1	---	7.5	16.774	5	1	1	1.199	0.097544
A0A3B5XUH5	Nuclear pore complex protein OS=Triticum aestivum OX=4565 PE=3 SV=1	---	7.9	118.85	37	8	8	1.281	0.100735
A0A3B5XUK4	Expressed protein(predicted) OS=Triticum aestivum OX=4565 PE=4 SV=1	---	7.1	125.05	21	6	6	0.622	0.00065587
A0A3B5XUP0	Endosperm transfer cell specific PR60(predicted) OS=Triticum aestivum OX=4565 PE=4 SV=1	---	23.4	11.979	5	2	2	0.558	0.0138564
A0A3B5XUU0	Isovaleryl-CoA dehydrogenase, mitochondrial(predicted) OS=Triticum aestivum OX=4565 PE=3 SV=1	---	7.6	30.199	3	2	2	1.18	0.83246
A0A3B5XUU3	Transcription termination factor MTEF18, mitochondrial(predicted) OS=Triticum aestivum OX=4565 PE=4 SV=1	---	1.8	63.661	1	1	1	0.742	0.109942
A0A3B5XUX2	Phosphoinositide phospholipase C OS=Triticum aestivum OX=4565 PE=4 SV=1	---	24.2	65.384	48	12	12	1.142	0.207
A0A3B5XUY5	J domain-containing protein OS=Triticum aestivum OX=4565 PE=4 SV=1	---	19.2	36.276	9	4	4	0.733	0.21646
A0A3B5XV05	Acetylornithine aminotransferase, mitochondrial(predicted) OS=Triticum aestivum OX=4565 PE=3 SV=1	---	21.2	48.194	3	8	1
A0A3B5XV10	Endoglucanase OS=Triticum aestivum OX=4565 PE=3 SV=1	---	32.2	53.343	24	13	4	0.813	0.187282
A0A3B5XV32	12S seed storage globulin 1(predicted) OS=Triticum aestivum OX=4565 PE=4 SV=1	---	45.3	63.866	68	21	5	0.367	0.0089445
A0A3B5XV46	DUF724 domain-containing protein 2(predicted) OS=Triticum aestivum OX=4565 PE=4 SV=1	---	19.4	49.669	11	7	2	0.465	0.030979
A0A3B5XV61	Nitrogen regulatory protein P-II(predicted) OS=Triticum aestivum OX=4565 PE=3 SV=1	---	7.3	16.206	4	1	1	0.438	0.00024173
A0A3B5XV85	Endoglucanase OS=Triticum aestivum OX=4565 PE=3 SV=1	---	31.2	53.768	16	13	2	0.537	0.00116064
A0A3B5XVA7	Zinc ion binding(predicted) OS=Triticum aestivum OX=4565 PE=4 SV=1	---	4.4	93.103	11	3	3	1.576	0.04622
A0A3B5XVC8	RNA polymerase II-associated protein 3(predicted) OS=Triticum aestivum OX=4565 PE=4 SV=1	---	3.7	41.839	3	1	1	1.048	0.8694
A0A3B5XVE0	RING-type domain-containing protein OS=Triticum aestivum OX=4565 PE=4 SV=1	---	7.5	95.052	30	6	6	1.238	0.066975
A0A3B5XVF6	Aminotran_1_2 domain-containing protein OS=Triticum aestivum OX=4565 PE=4 SV=1	---	50.2	52.805	132	21	1	0.842	0.022582
A0A3B5XVH9	Peroxidase OS=Triticum aestivum OX=4565 PE=3 SV=1	---	17.7	35.022	2	3	1
A0A3B5XVN6	Carboxypeptidase OS=Triticum aestivum OX=4565 PE=3 SV=1	---	22.2	52.677	62	9	3	0.596	0.00189541
A0A3B5XVQ5	Transcription regulatory protein SNF2(predicted) OS=Triticum aestivum OX=4565 PE=4 SV=1	---	5.6	104.27	12	4	4	0.965	0.91196
A0A3B5XVS1	PWWP domain-containing protein OS=Triticum aestivum OX=4565 PE=4 SV=1	---	2.1	117.59	4	2	2	1.201	0.0088361
A0A3B5XVT0	Kinesin-like protein OS=Triticum aestivum OX=4565 PE=3 SV=1	---	10	82.255	22	7	4	1.013	0.84634
A0A3B5XVY1	Starch synthase III(predicted) OS=Triticum aestivum OX=4565 PE=3 SV=1	---	13.9	183.06	6	20	1	0.243	2.777e-06
A0A3B5XVY7	Dihydrolipoyl dehydrogenase OS=Triticum aestivum OX=4565 PE=3 SV=1	---	18.8	59.149	36	8	8	1.292	0.06256
A0A3B5XW08	AIG1-type G domain-containing protein OS=Triticum aestivum OX=4565 PE=4 SV=1	---	20.4	127.39	159	22	2	1.094	0.13088
A0A3B5XW30	Alpha-galactosidase OS=Triticum aestivum OX=4565 PE=3 SV=1	---	29.6	43.995	50	10	3	0.664	0.00044087
A0A3B5XW36	rRNA biogenesis protein rrp5(predicted) OS=Triticum aestivum OX=4565 PE=4 SV=1	---	27.3	202.11	11	40	2	0.807	0.076262
A0A3B5XWJ4	SUN domain-containing protein OS=Triticum aestivum OX=4565 PE=4 SV=1	---	17.3	52.162	11	6	1	0.577	0.025804
A0A3B5XWL8	Leucine-rich repeat extensin-like protein 4(predicted) OS=Triticum aestivum OX=4565 PE=4 SV=1	---	24.2	44.898	6	7	1	0.971	0.75344
A0A3B5XWM2	Heat shock 70 kDa protein 4L(predicted) OS=Triticum aestivum OX=4565 PE=3 SV=1	---	21.9	61.733	11	10	1	1.136	0.0030393
A0A3B5XWN5	RNA_pol_L_2 domain-containing protein OS=Triticum aestivum OX=4565 PE=4 SV=1	---	39.5	13.93	40	5	1	1.486	0.111541
A0A3B5XWR5	Embryo-specific protein ATS3A(predicted) OS=Triticum aestivum OX=4565 PE=4 SV=1	---	20.8	18.465	14	3	1	0.404	0.00024119
A0A3B5XWZ1	Heat shock 70 kDa protein 4L(predicted) OS=Triticum aestivum OX=4565 PE=3 SV=1	---	18.4	90.595	3	11	1	0.696	0.0070039
A0A3B5XWZ9	Lipase_3 domain-containing protein OS=Triticum aestivum OX=4565 PE=4 SV=1	---	36.1	52.01	145	15	2	1.066	0.55394
A0A3B5XX09	RPOLD domain-containing protein OS=Triticum aestivum OX=4565 PE=4 SV=1	---	16.7	26.962	5	3	3	4.372	0.093699
A0A3B5XX28	Ras-related protein RABA4a(predicted) OS=Triticum aestivum OX=4565 PE=4 SV=1	---	8.9	23.546	2	2	2	1.158	0.59794
A0A3B5XX75	alpha-1,2-Mannosidase OS=Triticum aestivum OX=4565 PE=3 SV=1	---	15	68.483	18	7	7	0.917	0.37094
A0A3B5XX99	CYTB_NTER domain-containing protein OS=Triticum aestivum OX=4565 PE=4 SV=1	---	8.4	15.944	6	1	1	1.079	0.75312
A0A3B5XXE3	Mutant TFIIF-alpha, putative, expressed(predicted) OS=Triticum aestivum OX=4565 PE=4 SV=1	---	5.4	54.981	5	2	2	0.896	0.42528
A0A3B5XXE5	Lipase_GDSL domain-containing protein OS=Triticum aestivum OX=4565 PE=4 SV=1	---	12.1	45.875	13	5	1	0.705	0.1388
A0A3B5XXG8	EMC1_C domain-containing protein OS=Triticum aestivum OX=4565 PE=4 SV=1	---	12.7	99.953	10	10	2	1.221	0.0024969
A0A3B5XXG9	Arginyl-tRNA synthetase(predicted) OS=Triticum aestivum OX=4565 PE=3 SV=1	---	8.7	65.371	19	4	4	0.972	0.4628
A0A3B5XXH8	myosin-9 isoform X1(predicted) OS=Triticum aestivum OX=4565 PE=4 SV=1	---	4.2	74.328	1	2	2	0.355	0.0096801
A0A3B5XXL3	Gln-synt_C domain-containing protein OS=Triticum aestivum OX=4565 PE=3 SV=1	---	4.9	93.264	9	5	5	0.708	0.135437
A0A3B5XXM3	Tobamovirus multiplication protein 2A(predicted) OS=Triticum aestivum OX=4565 PE=3 SV=1	---	6.4	29.305	5	1	1	1.231	0.128544
A0A3B5XXP5	Endonuclease/exonuclease/phosphatase family protein, putative, expressed(predicted) OS=Triticum aestivum OX=4565 PE=4 SV=1	---	18.7	65.019	25	7	7	0.903	0.30834
A0A3B5XXS0	Prolyl 4-hydroxylase 2(predicted) OS=Triticum aestivum OX=4565 PE=4 SV=1	---	36.5	32.662	59	7	7	0.898	0.019935
A0A3B5XXT8	Cellulose synthase OS=Triticum aestivum OX=4565 PE=3 SV=1	---	4.5	118.18	6	4	0	1.809	0.0026765
A0A3B5XXY2	3-ketoacyl-CoA thiolase 2, peroxisomal(predicted) OS=Triticum aestivum OX=4565 PE=3 SV=1	---	30.1	47.75	48	9	1	0.748	0.033001
A0A3B5XY02	Exportin-4(predicted) OS=Triticum aestivum OX=4565 PE=4 SV=1	---	5.1	81.481	8	3	3	1.71	0.20426
A0A3B5XY16	WD_REPEATS_REGION domain-containing protein OS=Triticum aestivum OX=4565 PE=4 SV=1	---	24.1	63.026	43	11	1	1.177	0.0169574
A0A3B5XY18	Malate dehydrogenase OS=Triticum aestivum OX=4565 PE=3 SV=1	---	27.4	35.074	70	6	6	0.704	0.0189366
A0A3B5XY50	28S ribosomal protein S29, mitochondrial(predicted) OS=Triticum aestivum OX=4565 PE=4 SV=1	---	11.1	52.061	14	5	1	0.778	0.172502
A0A3B5XY59	Coatomer subunit gamma OS=Triticum aestivum OX=4565 PE=3 SV=1	---	28.5	98.704	78	20	1	0.795	0.068904
A0A3B5XY77	UBIQUITIN_CONJUGAT_2 domain-containing protein OS=Triticum aestivum OX=4565 PE=4 SV=1	---	9.3	51.777	14	3	3	0.93	0.65794
A0A3B5XYD9	Double-stranded RNA-binding protein 6(predicted) OS=Triticum aestivum OX=4565 PE=4 SV=1	---	8.8	53.906	11	4	4	1.69	0.18348
A0A3B5XYH1	Myosin-J heavy chain(predicted) OS=Triticum aestivum OX=4565 PE=3 SV=1	---	6.4	142.56	16	6	5	1.183	0.089483
A0A3B5XYL5	TPR_REGION domain-containing protein OS=Triticum aestivum OX=4565 PE=4 SV=1	---	16	93.672	10	12	2	1.094	0.48062
A0A3B5XYM5	KH domain-containing protein(predicted) OS=Triticum aestivum OX=4565 PE=4 SV=1	---	35.9	88.115	17	22	2	0.575	0.067945
A0A3B5XYT5	UBIQUITIN_CONJUGAT_2 domain-containing protein OS=Triticum aestivum OX=4565 PE=3 SV=1	---	23.6	16.673	11	3	3	1.019	0.5572
A0A3B5XYV1	Expressed protein(predicted) OS=Triticum aestivum OX=4565 PE=4 SV=1	---	6.7	126.14	10	6	6	1.83	0.0193027
A0A3B5XYV9	Fe2OG dioxygenase domain-containing protein OS=Triticum aestivum OX=4565 PE=4 SV=1	---	53	32.836	8	10	1	1.487	0.113544
A0A3B5XZ02	DUF538 family protein(predicted) OS=Triticum aestivum OX=4565 PE=4 SV=1	---	22	17.893	12	3	3	1.241	0.084383
A0A3B5XZ09	Cytochrome b5 heme-binding domain-containing protein OS=Triticum aestivum OX=4565 PE=3 SV=1	---	13.4	20.53	8	2	1	0.789	0.26122
A0A3B5XZC2	UBX domain-containing protein OS=Triticum aestivum OX=4565 PE=4 SV=1	---	12.4	50.852	13	5	1	0.955	0.5716
A0A3B5XZD1	Xanthine dehydrogenase(predicted) OS=Triticum aestivum OX=4565 PE=4 SV=1	---	3.1	149.3	2	3	3	0.85	0.49488
A0A3B5XZJ4	Ribosome quality control complex subunit 2(predicted) OS=Triticum aestivum OX=4565 PE=4 SV=1	---	4	28.19	1	1	1
A0A3B5XZJ7	Chloroplast inner envelope protein, putative, expressed(predicted) OS=Triticum aestivum OX=4565 PE=4 SV=1	---	17.6	112.48	51	16	16	0.93	0.3389
A0A3B5XZK0	Putative methyltransferase PMT21(predicted) OS=Triticum aestivum OX=4565 PE=4 SV=1	---	30.3	69.871	1	16	1	1.485	0.0117202
A0A3B5XZM9	J domain-containing protein OS=Triticum aestivum OX=4565 PE=4 SV=1	---	15.8	281.32	3	33	1	0.701	0.0100757
A0A3B5XZQ9	NADPH-protochlorophyllide oxidoreductase OS=Triticum aestivum OX=4565 PE=3 SV=1	---	10.9	42.234	1	3	1	1.596	0.0037215
A0A3B5XZV5	Homeobox-leucine zipper protein ROC3(predicted) OS=Triticum aestivum OX=4565 PE=4 SV=1	---	1.1	94.078	4	1	1	1.472	0.162979
A0A3B5XZY3	MFS domain-containing protein OS=Triticum aestivum OX=4565 PE=3 SV=1	---	12.2	77.701	26	6	6	0.949	0.57732
A0A3B5Y023	Pyruvate kinase OS=Triticum aestivum OX=4565 PE=3 SV=1	---	6.9	51.186	9	3	2	0.71	0.00151831
A0A3B5Y042	Vps54_N domain-containing protein OS=Triticum aestivum OX=4565 PE=4 SV=1	---	1.7	88.322	3	1	1	0.35	0.0021163
A0A3B5Y048	Protein kinase domain-containing protein OS=Triticum aestivum OX=4565 PE=4 SV=1	---	8.5	66.551	7	3	3	0.648	0.0044381
A0A3B5Y056	AIG1-type G domain-containing protein OS=Triticum aestivum OX=4565 PE=4 SV=1	---	11	115.77	10	10	2	1.385	0.040124
A0A3B5Y078	Protein kinase domain-containing protein OS=Triticum aestivum OX=4565 PE=4 SV=1	---	9.2	48.54	11	3	1	1.272	0.0169202
A0A3B5Y088	DDB1-and CUL4-associated factor 8(predicted) OS=Triticum aestivum OX=4565 PE=4 SV=1	---	2.4	50.588	6	1	1	0.687	0.0042376
A0A3B5Y095	Glycogenin-1(predicted) OS=Triticum aestivum OX=4565 PE=4 SV=1	---	3.7	55.702	10	2	1	1.1	0.52396
A0A3B5Y0E0	Putative vacuolar protein sorting-associated protein 13A(predicted) OS=Triticum aestivum OX=4565 PE=4 SV=1	---	13.8	469.02	132	44	0	0.722	0.0028568
A0A3B5Y0J4	Transcriptional regulator, putative, expressed(predicted) OS=Triticum aestivum OX=4565 PE=4 SV=1	---	8.9	264.79	6	19	0	1.005	0.98294
A0A3B5Y0L1	Nucleolar 16(predicted) OS=Triticum aestivum OX=4565 PE=4 SV=1	---	24.7	21.168	14	3	3	0.643	0.0020399
A0A3B5Y0M7	Peptide transporter PTR2(predicted) OS=Triticum aestivum OX=4565 PE=4 SV=1	---	2.1	56.152	6	1	1	1.6	0.031639
A0A3B5Y129	NAD kinase 1(predicted) OS=Triticum aestivum OX=4565 PE=3 SV=1	---	4.6	57.647	2	2	2	0.948	0.49568
A0A3B5Y145	Protein BONZAI 3(predicted) OS=Triticum aestivum OX=4565 PE=4 SV=1	---	15.6	62.811	27	8	4	0.993	0.84566
A0A3B5Y154	NAD(P)-bd_dom domain-containing protein OS=Triticum aestivum OX=4565 PE=4 SV=1	---	27.3	48.119	57	10	6	0.877	0.47492
A0A3B5Y1B6	BTB domain-containing protein OS=Triticum aestivum OX=4565 PE=4 SV=1	---	3	66.026	2	1	1
A0A3B5Y1D3	TPM_phosphatase domain-containing protein OS=Triticum aestivum OX=4565 PE=4 SV=1	---	17.3	30.006	24	6	6	1.329	0.0037445
A0A3B5Y1E8	Expressed protein(predicted) OS=Triticum aestivum OX=4565 PE=4 SV=1	---	27.2	35.183	39	7	3	1.104	0.106383
A0A3B5Y1F9	Pyruvate, phosphate dikinase OS=Triticum aestivum OX=4565 PE=3 SV=1	---	37.6	101.86	30	26	0	1.307	0.0075992
A0A3B5Y1G3	E3 ubiquitin-protein ligase KEG(predicted) OS=Triticum aestivum OX=4565 PE=4 SV=1	---	17	174.15	2	20	1	0.709	0.00151866
A0A3B5Y1N4	Beta-hexosaminidase OS=Triticum aestivum OX=4565 PE=3 SV=1	---	15.6	58.401	14	7	7	0.509	0.049901
A0A3B5Y1P6	Aamy domain-containing protein OS=Triticum aestivum OX=4565 PE=4 SV=1	---	20.6	85.711	6	12	3	0.664	0.20068
A0A3B5Y1R0	Letm1 RBD domain-containing protein OS=Triticum aestivum OX=4565 PE=4 SV=1	---	2.3	54.381	2	1	1	1.557	0.028904
A0A3B5Y1V7	Acyl carrier protein OS=Triticum aestivum OX=4565 PE=3 SV=1	---	10.2	13.789	10	1	1	0.939	0.022703
A0A3B5Y1W9	Pyruvate, phosphate dikinase OS=Triticum aestivum OX=4565 PE=3 SV=1	---	40.2	95.656	259	26	2	0.893	0.00142346
A0A3B5Y1Z2	Phosphoribosylanthranilate transferase, mRNA(predicted) OS=Triticum aestivum OX=4565 PE=4 SV=1	---	29	90.858	6	17	1	0.738	0.01066
A0A3B5Y209	DUF1682 family protein(predicted) OS=Triticum aestivum OX=4565 PE=4 SV=1	---	21.1	53.073	45	10	2	0.716	0.017184
A0A3B5Y268	Guanosine nucleotide diphosphate dissociation inhibitor OS=Triticum aestivum OX=4565 PE=3 SV=1	---	33.6	49.816	41	11	6	0.952	0.52738
A0A3B5Y288	MADS-box transcription factor 21(predicted) OS=Triticum aestivum OX=4565 PE=4 SV=1	---	18.9	20.336	17	3	3	1.168	0.151219
A0A3B5Y2A0	Glycosyltransferase(predicted) OS=Triticum aestivum OX=4565 PE=4 SV=1	---	3.3	50.692	1	1	1	1.78	0.030784
A0A3B5Y2A7	60S acidic ribosomal protein P2B(predicted) OS=Triticum aestivum OX=4565 PE=3 SV=1	---	40.7	11.505	44	5	3	0.927	0.3116
A0A3B5Y2B7	Patellin-1(predicted) OS=Triticum aestivum OX=4565 PE=4 SV=1	---	11.7	64.89	19	5	5	0.594	0.00026395
A0A3B5Y2C4	Protein STIP1-like protein(predicted) OS=Triticum aestivum OX=4565 PE=4 SV=1	---	3	36.108	0	1	1	0.968	0.53384
A0A3B5Y2C9	Usp domain-containing protein OS=Triticum aestivum OX=4565 PE=4 SV=1	---	50.6	18.142	61	8	7	1.537	0.0036769
A0A3B5Y2M8	Protein BUD31-2-like protein(predicted) OS=Triticum aestivum OX=4565 PE=4 SV=1	---	37.9	22.698	60	7	4	1.249	0.0081591
A0A3B5Y2N6	Protein transport protein SEC24(predicted) OS=Triticum aestivum OX=4565 PE=4 SV=1	---	14.7	81.617	25	7	1	0.491	0.00035845
A0A3B5Y2N7	CUE domain-containing protein OS=Triticum aestivum OX=4565 PE=4 SV=1	---	15.8	80.92	44	10	1	0.535	0.00159562
A0A3B5Y2P7	AAA domain-containing protein OS=Triticum aestivum OX=4565 PE=3 SV=1	---	10.3	57.712	11	4	2	0.929	0.7466
A0A3B5Y2R4	Arginyl-tRNA--protein transferase OS=Triticum aestivum OX=4565 PE=3 SV=1	---	13.1	65.384	9	6	1	1.602	0.023122
A0A3B5Y2W1	CSP1(predicted) OS=Triticum aestivum OX=4565 PE=4 SV=1	---	23.5	17.219	6	2	1	0.039	0.0010191
A0A3B5Y328	Serine/threonine-protein kinase ATM(predicted) OS=Triticum aestivum OX=4565 PE=4 SV=1	---	2.4	98.763	4	2	2	2.456	0.0022405
A0A3B5Y343	Protein kinase domain-containing protein OS=Triticum aestivum OX=4565 PE=4 SV=1	---	3	64.028	7	2	2	1.635	0.027656
A0A3B5Y3H0	Metacaspase 3(predicted) OS=Triticum aestivum OX=4565 PE=4 SV=1	---	20.8	45.509	35	7	1	1.11	0.034141
A0A3B5Y3M0	KH domain-containing protein OS=Triticum aestivum OX=4565 PE=4 SV=1	---	21	33.225	3	5	0	0.826	0.41694
A0A3B5Y3U4	Protein RNA-directed DNA methylation 3(predicted) OS=Triticum aestivum OX=4565 PE=4 SV=1	---	9.8	164.73	45	12	0	0.969	0.64896
A0A3B5Y3W2	Transcription elongation factor spt6 OS=Triticum aestivum OX=4565 PE=3 SV=1	---	18.3	183.09	6	26	2	1.914	0.131542
A0A3B5Y3Z2	Coilin_N domain-containing protein OS=Triticum aestivum OX=4565 PE=4 SV=1	---	7.9	79.583	10	4	4	0.682	0.0090843
A0A3B5Y441	Expansin OS=Triticum aestivum OX=4565 PE=3 SV=1	---	19.1	22.121	4	3	2	1.622	0.32118
A0A3B5Y442	FCP1 homology domain-containing protein OS=Triticum aestivum OX=4565 PE=4 SV=1	---	3.6	40.781	1	1	1	1.451	0.28948
A0A3B5Y470	Usp domain-containing protein OS=Triticum aestivum OX=4565 PE=4 SV=1	---	23.6	27.992	6	4	1	2.032	0.049516
A0A3B5Y475	KH domain-containing protein OS=Triticum aestivum OX=4565 PE=4 SV=1	---	23.5	32.969	20	5	0	0.421	0.00083702
A0A3B5Y4A5	NADH-cytochrome b5 reductase OS=Triticum aestivum OX=4565 PE=3 SV=1	---	14	30.972	7	3	1	1.061	0.140539
A0A3B5Y4B5	Glyco_transf_20 domain-containing protein OS=Triticum aestivum OX=4565 PE=4 SV=1	---	10.2	109.69	30	9	9	0.597	0.0038395
A0A3B5Y4C0	101 kDa heat shock protein(predicted) OS=Triticum aestivum OX=4565 PE=3 SV=1	---	30.4	101.05	6	22	3	1.419	0.99156
A0A3B5Y4C6	Periodic tryptophan protein 2(predicted) OS=Triticum aestivum OX=4565 PE=4 SV=1	---	27.7	97.172	12	22	3	0.783	0.023862
A0A3B5Y4D4	CRC domain-containing protein OS=Triticum aestivum OX=4565 PE=4 SV=1	---	12.4	38.374	10	3	3	1.388	0.025264
A0A3B5Y4D9	Signal recognition particle 54 kDa protein OS=Triticum aestivum OX=4565 PE=3 SV=1	---	36.2	54.489	5	16	0	1.334	0.023738
A0A3B5Y4E5	Phosphotransferase OS=Triticum aestivum OX=4565 PE=3 SV=1	---	34.1	54.791	15	13	1	1.141	0.057735
A0A3B5Y4F9	Cytochrome P450(predicted) OS=Triticum aestivum OX=4565 PE=3 SV=1	---	18	57.926	41	8	1	1.05	0.2611
A0A3B5Y4G6	Profilin OS=Triticum aestivum OX=4565 PE=3 SV=1	---	28.3	12.52	2	2	2	2.289	0.00040199
A0A3B5Y4H6	Mic1 domain-containing protein OS=Triticum aestivum OX=4565 PE=4 SV=1	---	10.1	80.089	5	5	1	0.802	0.072904
A0A3B5Y4S8	Starch synthase, chloroplastic/amyloplastic OS=Triticum aestivum OX=4565 PE=3 SV=1	---	8.5	77.77	6	4	4	0.774	0.026742
A0A3B5Y4T9	Ribos_L4_asso_C domain-containing protein OS=Triticum aestivum OX=4565 PE=4 SV=1	---	48.3	44.307	17	19	2	1.095	0.29502
A0A3B5Y4U7	Acyltransferase(predicted) OS=Triticum aestivum OX=4565 PE=4 SV=1	---	28.2	47.601	10	9	3	1.18	0.00110275
A0A3B5Y4V5	Sulfite reductase(predicted) OS=Triticum aestivum OX=4565 PE=4 SV=1	---	5.7	68.276	4	4	4	1.27	0.48428
A0A3B5Y5E5	Dolichyl-diphosphooligosaccharide--protein glycosyltransferase subunit STT3(predicted) OS=Triticum aestivum OX=4565 PE=4 SV=1	---	13.6	86.962	51	10	10	0.964	0.52402
A0A3B5Y5J8	WD_REPEATS_REGION domain-containing protein OS=Triticum aestivum OX=4565 PE=4 SV=1	---	60.9	36.281	1	15	1	1.028	0.76318
A0A3B5Y5K9	ATP synthase subunit beta OS=Triticum aestivum OX=4565 PE=3 SV=1	---	53.7	59.162	210	21	4	0.978	0.12136
A0A3B5Y5P1	PMEI domain-containing protein OS=Triticum aestivum OX=4565 PE=4 SV=1	---	6.6	23.384	6	1	1	0.6	0.00044473
A0A3B5Y642	RRM domain-containing protein OS=Triticum aestivum OX=4565 PE=4 SV=1	---	9.4	26.702	4	2	2	0.573	0.0027379
A0A3B5Y676	Asparagine synthetase [glutamine-hydrolyzing] OS=Triticum aestivum OX=4565 PE=4 SV=1	---	8.8	52.07	18	4	3	1.008	0.99022
A0A3B5Y680	Farnesyl pyrophosphate synthase(predicted) OS=Triticum aestivum OX=4565 PE=3 SV=1	---	15.7	40.067	8	4	1	0.911	0.4439
A0A3B5Y6A9	Mitogen-activated protein kinase OS=Triticum aestivum OX=4565 PE=4 SV=1	---	7.5	61.999	10	4	4	2.753	7.8372e-05
A0A3B5Y6B3	FRIGIDA-like protein OS=Triticum aestivum OX=4565 PE=3 SV=1	---	8.3	68.064	12	4	4	1.067	0.24538
A0A3B5Y6D0	26S proteasome non-ATPase regulatory subunit 5(predicted) OS=Triticum aestivum OX=4565 PE=4 SV=1	---	24.1	57.536	27	10	10	0.494	0.0032039
A0A3B5Y6G2	PHB domain-containing protein OS=Triticum aestivum OX=4565 PE=4 SV=1	---	50.3	31.783	1	9	1
A0A3B5Y6J0	CMP-KDO synthetase1(predicted) OS=Triticum aestivum OX=4565 PE=3 SV=1	---	23.2	32.142	3	4	0	0.844	0.0027609
A0A3B5Y6N2	Proteasome subunit beta OS=Triticum aestivum OX=4565 PE=3 SV=1	---	36.5	26.093	38	8	1	1.204	0.034637
A0A3B5Y6N5	GRAS domain-containing protein OS=Triticum aestivum OX=4565 PE=3 SV=1	---	12.7	51.254	1	5	1
A0A3B5Y754	Structural maintenance of chromosomes protein OS=Triticum aestivum OX=4565 PE=3 SV=1	---	31.5	138.27	187	36	31	1.135	0.03234
A0A3B5Y795	Tyrosine-protein phosphatase domain-containing protein OS=Triticum aestivum OX=4565 PE=4 SV=1	---	3.7	65.842	4	2	2	0.836	0.27736
A0A3B5Y7C9	Carboxypeptidase OS=Triticum aestivum OX=4565 PE=3 SV=1	---	8.6	48.141	6	3	3	0.992	0.99672
A0A3B5Y7K9	Mot1(predicted) OS=Triticum aestivum OX=4565 PE=4 SV=1	---	0.8	211.16	1	1	1	0.623	0.0104571
A0A3B5Y7M7	Indole-3-glycerol phosphate lyase, chloroplastic(predicted) OS=Triticum aestivum OX=4565 PE=3 SV=1	---	7.6	26.447	3	1	1	0.905	0.40612
A0A3B5Y7P7	H15 domain-containing protein OS=Triticum aestivum OX=4565 PE=4 SV=1	---	5	109.18	10	5	2	3.698	0.11592
A0A3B5Y7P9	NPL domain-containing protein OS=Triticum aestivum OX=4565 PE=4 SV=1	---	32.2	31.77	43	8	1	0.503	3.8027e-06
A0A3B5Y7U7	Protease Do-like 1, chloroplastic(predicted) OS=Triticum aestivum OX=4565 PE=4 SV=1	---	6.3	37.796	2	1	1	0.485	0.063565
A0A3B5Y7V5	ATP-dependent Clp protease proteolytic subunit OS=Triticum aestivum OX=4565 PE=3 SV=1	---	3.8	40.764	6	1	1	1.072	0.50406
A0A3B5Y7Y1	Ketol-acid reductoisomerase OS=Triticum aestivum OX=4565 PE=3 SV=1	---	26.4	62.72	98	14	14	1.059	0.098982
A0A3B5Y800	Amidase domain-containing protein OS=Triticum aestivum OX=4565 PE=4 SV=1	---	27.6	64.983	65	13	3	1.076	0.079102
A0A3B5Y837	Translation initiation factor IF-2(predicted) OS=Triticum aestivum OX=4565 PE=4 SV=1	---	26.8	22.565	14	6	3	1.352	0.075664
A0A3B5Y839	AAA domain-containing protein OS=Triticum aestivum OX=4565 PE=3 SV=1	---	33.3	75.765	47	16	4	0.672	0.00167879
A0A3B5Y8G1	Putative RNA polymerase sigma factor(predicted) OS=Triticum aestivum OX=4565 PE=4 SV=1	---	6.4	38.851	3	2	2	1.495	0.071616
A0A3B5Y8K2	Protein kinase domain-containing protein OS=Triticum aestivum OX=4565 PE=4 SV=1	---	7.7	56.553	12	4	2	1.355	2.1848e-06
A0A3B5Y8Q2	Uncharacterized protein OS=Triticum aestivum OX=4565 PE=4 SV=1	---	3.7	27.576	6	1	1	1.056	0.69244
A0A3B5YPP5	Phospholipid-transporting ATPase OS=Triticum aestivum OX=4565 PE=3 SV=1	---	2.5	136.76	4	2	2	0.098	3.5469e-05
A0A3B5YPW5	Meiosis protein mei2(predicted) OS=Triticum aestivum OX=4565 PE=4 SV=1	---	2.4	98.3	6	2	2	0.641	0.90702
A0A3B5YPZ7	AAI domain-containing protein OS=Triticum aestivum OX=4565 PE=4 SV=1	---	40.9	22.549	67	4	3	1.219	0.0422
A0A3B5YQ33	AMPKBI domain-containing protein OS=Triticum aestivum OX=4565 PE=4 SV=1	---	8.9	12.552	6	1	1	0.943	0.29484
A0A3B5YQL0	50S ribosomal protein L22(predicted) OS=Triticum aestivum OX=4565 PE=3 SV=1	---	6.2	29.689	3	2	2	1.621	0.00185948
A0A3B5YQZ6	PUM-HD domain-containing protein OS=Triticum aestivum OX=4565 PE=4 SV=1	---	6.1	80.624	1	4	2	0.557	0.19818
A0A3B5YR30	Neprosin domain-containing protein OS=Triticum aestivum OX=4565 PE=4 SV=1	---	6.5	27.826	2	1	1	0.321	0.00121876
A0A3B5YRF1	YTH domain-containing protein OS=Triticum aestivum OX=4565 PE=4 SV=1	---	11.6	52.859	22	4	3	0.939	0.29364
A0A3B5YRG4	Dehydroascorbate reductase(predicted) OS=Triticum aestivum OX=4565 PE=3 SV=1	---	37.3	23.327	20	6	6	0.904	0.03798
A0A3B5YRJ3	HPt domain-containing protein OS=Triticum aestivum OX=4565 PE=4 SV=1	---	14.7	15.919	3	3	1	3.36	0.0039377
A0A3B5YRN8	Alternative splicing regulator(predicted) OS=Triticum aestivum OX=4565 PE=4 SV=1	---	6.5	38.376	9	3	2	2.206	0.196237
A0A3B5YS63	Tetraspanin-3(predicted) OS=Triticum aestivum OX=4565 PE=3 SV=1	---	6.1	32.879	1	1	1	1.323	0.167575
A0A3B5YS92	B3 domain-containing protein(predicted) OS=Triticum aestivum OX=4565 PE=4 SV=1	---	4.9	52.239	6	2	2	1.82	0.0041767
A0A3B5YSD3	rRNA biogenesis protein rrp5(predicted) OS=Triticum aestivum OX=4565 PE=4 SV=1	---	28.5	210.14	233	43	1	0.969	0.047279
A0A3B5YSH7	Glutelin type-A 2(predicted) OS=Triticum aestivum OX=4565 PE=4 SV=1	---	39.4	38.106	67	12	4	1.014	0.72478
A0A3B5YSI0	Nuclear pore complex protein NUP43(predicted) OS=Triticum aestivum OX=4565 PE=4 SV=1	---	4.6	36.417	6	1	1	1.012	0.99054
A0A3B5YSI9	Acetylornithine aminotransferase, mitochondrial(predicted) OS=Triticum aestivum OX=4565 PE=3 SV=1	---	22.2	48.403	37	9	2	1.053	0.53996
A0A3B5YSJ3	Endoglucanase OS=Triticum aestivum OX=4565 PE=3 SV=1	---	39.8	52.919	26	15	3	0.815	0.194916
A0A3B5YSL1	Glucose-6-phosphate isomerase OS=Triticum aestivum OX=4565 PE=3 SV=1	---	34.4	62.275	58	14	14	0.945	0.37764
A0A3B5YSR7	Germin-like protein OS=Triticum aestivum OX=4565 PE=3 SV=1	---	5.3	23.284	3	1	1	0.471	0.084258
A0A3B5YSY9	Carboxypeptidase OS=Triticum aestivum OX=4565 PE=3 SV=1	---	18.5	52.143	14	8	2	0.667	0.00101874
A0A3B5YT06	NADH-plastoquinone oxidoreductase subunit I (Fragment)(predicted) OS=Triticum aestivum OX=4565 PE=4 SV=1	---	49.1	6.2432	10	2	2	1.115	0.2717
A0A3B5YT54	Aspartic proteinase(predicted) OS=Triticum aestivum OX=4565 PE=3 SV=1	---	8	54.083	5	3	3	0.932	0.44002
A0A3B5YT90	Aminotran_1_2 domain-containing protein OS=Triticum aestivum OX=4565 PE=4 SV=1	---	50.2	52.819	7	21	0	0.438	0.000119
A0A3B5YTD3	Patatin OS=Triticum aestivum OX=4565 PE=3 SV=1	---	16.2	44.569	10	4	4	0.64	0.031804
A0A3B5YTE9	Ribosome biogenesis regulatory protein OS=Triticum aestivum OX=4565 PE=3 SV=1	---	21.2	36.364	36	5	2	0.428	3.9549e-05
A0A3B5YTF2	12s globulin(predicted) OS=Triticum aestivum OX=4565 PE=4 SV=1	---	14	55.176	11	6	3	0.525	0.0164586
A0A3B5YTL0	Cell division cycle-like protein(predicted) OS=Triticum aestivum OX=4565 PE=4 SV=1	---	4.6	106.5	3	4	0	1.277	0.147298
A0A3B5YTL8	Glutamate--cysteine ligase OS=Triticum aestivum OX=4565 PE=3 SV=1	---	9.3	45.594	5	3	3	0.474	0.124222
A0A3B5YTP0	Pyrophosphate-energized vacuolar membrane proton pump(predicted) OS=Triticum aestivum OX=4565 PE=3 SV=1	---	21.3	79.259	202	17	10	1.072	0.029278
A0A3B5YTP2	rRNA biogenesis protein rrp5(predicted) OS=Triticum aestivum OX=4565 PE=4 SV=1	---	28.4	210.07	3	43	1	0.209
A0A3B5YTT3	U1 small nuclear ribonucleoprotein A(predicted) OS=Triticum aestivum OX=4565 PE=4 SV=1	---	16.3	27.363	15	3	3	0.531	0.004899
A0A3B5YTX4	AMP-binding domain-containing protein OS=Triticum aestivum OX=4565 PE=4 SV=1	---	9.6	75.013	5	6	0	0.599	0.306
A0A3B5YU71	Heat shock 70 kDa protein 4L(predicted) OS=Triticum aestivum OX=4565 PE=3 SV=1	---	17.5	92.765	69	11	1	0.996	0.92832
A0A3B5YU89	FACT complex subunit SSRP1 OS=Triticum aestivum OX=4565 PE=3 SV=1	---	15.8	70.938	46	8	7	1.613	0.000118484
A0A3B5YUE8	60S ribosomal protein L11(predicted) OS=Triticum aestivum OX=4565 PE=3 SV=1	---	38.7	19.245	54	8	8	1.108	0.049541
A0A3B5YUG0	SUN domain-containing protein OS=Triticum aestivum OX=4565 PE=4 SV=1	---	25.8	49.936	25	8	3	0.951	0.5433
A0A3B5YUG9	RRM domain-containing protein OS=Triticum aestivum OX=4565 PE=4 SV=1	---	8.4	41.689	11	3	3	0.706	0.35688
A0A3B5YUJ8	Receptor-like protein kinase(predicted) OS=Triticum aestivum OX=4565 PE=4 SV=1	---	24.3	44.902	29	8	2	0.883	0.2996
A0A3B5YUR3	HECT domain-containing protein OS=Triticum aestivum OX=4565 PE=4 SV=1	---	10	114.63	23	8	8	0.684	1.1299e-07
A0A3B5YUX1	AIG1-type G domain-containing protein OS=Triticum aestivum OX=4565 PE=4 SV=1	---	19.3	130.4	6	21	1	0.575	0.034701
A0A3B5YUX3	RNA-binding protein 39(predicted) OS=Triticum aestivum OX=4565 PE=4 SV=1	---	5.1	66.104	6	2	1	1.513	0.0051997
A0A3B5YUZ4	CBM20 domain-containing protein OS=Triticum aestivum OX=4565 PE=4 SV=1	---	16.4	78.007	37	9	7	0.767	0.046725
A0A3B5YV85	Serine/arginine-rich splicing factor 4(predicted) OS=Triticum aestivum OX=4565 PE=4 SV=1	---	15.7	23.454	6	3	2	0.582	0.00127635
A0A3B5YV90	Protein kinase domain-containing protein OS=Triticum aestivum OX=4565 PE=4 SV=1	---	13.5	93.773	43	10	8	1.271	0.178221
A0A3B5YVF1	UDP-glucose:glycoprotein glucosyltransferase 1(predicted) OS=Triticum aestivum OX=4565 PE=4 SV=1	---	10.2	165.27	5	14	1	1.43	0.021843
A0A3B5YVF3	Malic enzyme OS=Triticum aestivum OX=4565 PE=3 SV=1	---	12.8	49.547	6	4	3	0.29	0.0030429
A0A3B5YVH5	Long-chain-alcohol oxidase OS=Triticum aestivum OX=4565 PE=3 SV=1	---	11.8	82.008	32	7	7	0.817	0.094498
A0A3B5YVJ5	Heat shock 70 kDa protein 4L(predicted) OS=Triticum aestivum OX=4565 PE=3 SV=1	---	14.8	92.232	2	10	1	0.696	0.041864
A0A3B5YVL5	DNA helicase OS=Triticum aestivum OX=4565 PE=3 SV=1	---	23.7	91.578	70	19	19	1.073	0.08244
A0A3B5YVM3	Transcription elongation regulator 1(predicted) OS=Triticum aestivum OX=4565 PE=4 SV=1	---	3.9	96.556	6	3	1	1.018	0.76914
A0A3B5YVN0	Protein kinase domain-containing protein OS=Triticum aestivum OX=4565 PE=3 SV=1	---	12.6	52.142	21	4	4	1.108	0.42988
A0A3B5YVR7	Myosin-J heavy chain(predicted) OS=Triticum aestivum OX=4565 PE=3 SV=1	---	1.3	103.45	1	1	1	0.831	0.28916
A0A3B5YVU3	KH domain-containing protein(predicted) OS=Triticum aestivum OX=4565 PE=4 SV=1	---	37.1	88.229	105	22	2	0.78	0.0047598
A0A3B5YVU9	Putative methyltransferase PMT8(predicted) OS=Triticum aestivum OX=4565 PE=4 SV=1	---	29.6	69.286	52	15	15	1.253	0.071038
A0A3B5YW44	Monothiol glutaredoxin-S11(predicted) OS=Triticum aestivum OX=4565 PE=4 SV=1	---	17	53.147	1	6	1	0.901	0.3003
A0A3B5YW93	GATA transcription factor 12(predicted) OS=Triticum aestivum OX=4565 PE=4 SV=1	---	3.2	31.706	6	1	1	1.381	0.074118
A0A3B5YWG9	Trafficking protein particle complex subunit 13(predicted) OS=Triticum aestivum OX=4565 PE=4 SV=1	---	13.1	46.723	12	4	4	0.484	0.00010298
A0A3B5YWP9	RNA-binding Musashi-2-like protein(predicted) OS=Triticum aestivum OX=4565 PE=4 SV=1	---	26.6	44.481	68	8	8	0.273	0.00050196
A0A3B5YWR8	mitochondrial carnitine/acylcarnitine carrier-like protein(predicted) OS=Triticum aestivum OX=4565 PE=3 SV=1	---	7	31.488	2	2	2	0.708	0.72038
A0A3B5YWT5	Expressed protein(predicted) OS=Triticum aestivum OX=4565 PE=4 SV=1	---	27.5	20.673	17	4	4	1.663	0.00023711
A0A3B5YWZ2	BRO1 domain-containing protein OS=Triticum aestivum OX=4565 PE=4 SV=1	---	15.5	93.381	25	10	10	0.51	0.0054831
A0A3B5YWZ3	40S ribosomal protein S17-4(predicted) OS=Triticum aestivum OX=4565 PE=3 SV=1	---	35	16.492	79	7	7	0.853	0.125701
A0A3B5YX59	Expansin-like A2(predicted) OS=Triticum aestivum OX=4565 PE=3 SV=1	---	14.5	28.582	14	3	3	0.845	0.24976
A0A3B5YX89	Alpha-galactosidase OS=Triticum aestivum OX=4565 PE=3 SV=1	---	22.6	41.139	1	7	1	1.097	0.36112
A0A3B5YXC5	DNA ligase OS=Triticum aestivum OX=4565 PE=3 SV=1	---	21.3	87.487	4	12	1	1.402	0.023499
A0A3B5YXC7	Putative methyltransferase PMT21(predicted) OS=Triticum aestivum OX=4565 PE=4 SV=1	---	31.2	67.604	97	16	0	1.405	0.0096196
A0A3B5YXD3	Cytochrome b5 heme-binding domain-containing protein OS=Triticum aestivum OX=4565 PE=3 SV=1	---	12.4	21.529	4	2	1	0.833	0.498
A0A3B5YXJ5	DEAD-box ATP-dependent RNA helicase 12(predicted) OS=Triticum aestivum OX=4565 PE=3 SV=1	---	39	59.278	108	17	1	0.696	0.0146419
A0A3B5YXK3	Nucleoside diphosphate kinase OS=Triticum aestivum OX=4565 PE=3 SV=1	---	31.3	16.617	11	4	1	0.319	0.102398
A0A3B5YXL4	Poly(RC)-binding protein 3(predicted) OS=Triticum aestivum OX=4565 PE=4 SV=1	---	8.2	47.933	12	4	4	1.021	0.7578
A0A3B5YXP0	Proline dehydrogenase OS=Triticum aestivum OX=4565 PE=3 SV=1	---	12.5	51.221	22	5	5	1.524	0.00032363
A0A3B5YXU2	Dynamin-related protein 1E(predicted) OS=Triticum aestivum OX=4565 PE=3 SV=1	---	18.7	68.663	3	10	1	0.714
A0A3B5YXV3	UBX domain-containing protein OS=Triticum aestivum OX=4565 PE=4 SV=1	---	13.3	50.714	2	5	1	3.964	0.0118987
A0A3B5YXV7	Putative vacuolar protein sorting-associated protein 13A(predicted) OS=Triticum aestivum OX=4565 PE=4 SV=1	---	13.5	469.39	8	44	3	0.628	0.0020359
A0A3B5YXX8	Methionine aminopeptidase OS=Triticum aestivum OX=4565 PE=3 SV=1	---	15.8	41.75	13	4	4	0.697	0.0113815
A0A3B5YY15	Trihelix transcription factor GT-2(predicted) OS=Triticum aestivum OX=4565 PE=4 SV=1	---	4.2	73.44	8	3	3	1.673	0.0132648
A0A3B5YY17	Serine/threonine-protein kinase TOR OS=Triticum aestivum OX=4565 PE=3 SV=1	---	9.6	277.07	66	18	18	0.813	0.18986
A0A3B5YY18	Autophagy-related protein 3 OS=Triticum aestivum OX=4565 PE=3 SV=1	---	9	34.78	8	2	2	0.829	0.24912
A0A3B5YY40	Protein kinase domain-containing protein OS=Triticum aestivum OX=4565 PE=3 SV=1	---	3	48.827	5	1	1	1.402	0.0049824
A0A3B5YY44	DUF862 domain-containing protein OS=Triticum aestivum OX=4565 PE=4 SV=1	---	11.6	26.912	2	2	2	1.003	0.99172
A0A3B5YY55	N-alpha-acetyltransferase 25, NatB auxiliary subunit(predicted) OS=Triticum aestivum OX=4565 PE=4 SV=1	---	7.4	109.3	18	6	6	0.907	0.45596
A0A3B5YY68	J domain-containing protein OS=Triticum aestivum OX=4565 PE=4 SV=1	---	17.1	281.3	138	34	2	0.931	0.00130127
A0A3B5YYC8	Conserved oligomeric Golgi complex subunit 5(predicted) OS=Triticum aestivum OX=4565 PE=4 SV=1	---	10.4	89.742	21	6	1	1.114	0.169918
A0A3B5YYC9	PlsC domain-containing protein OS=Triticum aestivum OX=4565 PE=4 SV=1	---	13.4	42.314	15	4	3	0.734	0.0024564
A0A3B5YYD8	Alpha-glucosidase like protein(predicted) OS=Triticum aestivum OX=4565 PE=3 SV=1	---	3.8	99.873	8	3	3	1.19	0.43886
A0A3B5YYE9	Annexin OS=Triticum aestivum OX=4565 PE=3 SV=1	---	3	39.688	6	1	1	0.988	0.88452
A0A3B5YYF5	Protein kinase domain-containing protein OS=Triticum aestivum OX=4565 PE=4 SV=1	---	22.1	56.595	23	8	4	0.623	0.116143
A0A3B5YYM1	Argininosuccinate synthase, chloroplastic(predicted) OS=Triticum aestivum OX=4565 PE=3 SV=1	---	16.2	52.15	6	7	1	0.993	0.98722
A0A3B5YYM6	Aamy domain-containing protein OS=Triticum aestivum OX=4565 PE=4 SV=1	---	26.9	85.511	17	14	5	0.633	0.010661
A0A3B5YYM8	AIG1-type G domain-containing protein OS=Triticum aestivum OX=4565 PE=4 SV=1	---	11.5	116.84	45	10	0	1.081	0.72066
A0A3B5YYW4	Pyruvate, phosphate dikinase OS=Triticum aestivum OX=4565 PE=3 SV=1	---	37.4	96.194	6	25	2	0.238	0.00048446
A0A3B5YYZ3	CUE domain-containing protein OS=Triticum aestivum OX=4565 PE=4 SV=1	---	16.7	76.771	2	10	1
A0A3B5YYZ6	DNA topoisomerase 2 OS=Triticum aestivum OX=4565 PE=3 SV=1	---	19.2	166.33	138	26	1	1.334	0.002224
A0A3B5YYZ9	RING-type domain-containing protein OS=Triticum aestivum OX=4565 PE=4 SV=1	---	9.2	25.146	3	2	2	0.671	0.28838
A0A3B5YZ03	Glycosyltransferase(predicted) OS=Triticum aestivum OX=4565 PE=4 SV=1	---	6.2	56.086	3	2	2	0.156	0.0021574
A0A3B5YZ16	Expressed protein(predicted) OS=Triticum aestivum OX=4565 PE=4 SV=1	---	23	29.218	6	5	1	0.323	0.00115747
A0A3B5YZ17	A_deaminase domain-containing protein OS=Triticum aestivum OX=4565 PE=4 SV=1	---	19.7	95.398	48	12	9	0.829	0.0027392
A0A3B5YZD4	eRF1_1 domain-containing protein OS=Triticum aestivum OX=4565 PE=4 SV=1	---	9.1	49.228	11	3	1	1.437	0.0091771
A0A3B5YZE0	Glyoxysomal fatty acid beta-oxidation multifunctional protein MFP-a(predicted) OS=Triticum aestivum OX=4565 PE=3 SV=1	---	14.4	76.484	28	9	9	0.9	0.4271
A0A3B5YZG0	Phosphoribosylanthranilate transferase, mRNA(predicted) OS=Triticum aestivum OX=4565 PE=4 SV=1	---	30.4	87.001	74	17	1	1.04	0.074064
A0A3B5YZG7	Cold shock domain protein 2(predicted) OS=Triticum aestivum OX=4565 PE=4 SV=1	---	25.9	15.97	14	2	1	0.726	0.152284
A0A3B5YZN5	Protein kinase domain-containing protein OS=Triticum aestivum OX=4565 PE=3 SV=1	---	5	47.389	1	2	1	0.425	0.0034782
A0A3B5YZT7	Ribosomal protein OS=Triticum aestivum OX=4565 PE=3 SV=1	---	25.9	37.465	23	8	7	0.918	0.31942
A0A3B5YZV8	Mannosylglycoprotein endo-beta-mannosidase(predicted) OS=Triticum aestivum OX=4565 PE=4 SV=1	---	5.7	102.87	19	4	4	0.72	0.0092641
A0A3B5YZZ3	Arginyl-tRNA--protein transferase(predicted) OS=Triticum aestivum OX=4565 PE=4 SV=1	---	12.1	71.432	40	6	1	1.078	0.51536
A0A3B5Z005	HECT domain-containing protein OS=Triticum aestivum OX=4565 PE=4 SV=1	---	2.3	151.83	4	3	3	0.927	0.84898
A0A3B5Z044	Aldo_ket_red domain-containing protein OS=Triticum aestivum OX=4565 PE=4 SV=1	---	6.8	33.911	5	2	1	8.818	0.03526
A0A3B5Z061	Rab-GAP TBC domain-containing protein OS=Triticum aestivum OX=4565 PE=4 SV=1	---	8.3	89.468	21	6	6	0.643	0.057824
A0A3B5Z085	Bac_surface_Ag domain-containing protein OS=Triticum aestivum OX=4565 PE=4 SV=1	---	25.6	55.73	81	12	12	1.225	0.00161652
A0A3B5Z0B6	Zinc finger CCCH domain-containing protein 44(predicted) OS=Triticum aestivum OX=4565 PE=4 SV=1	---	1.4	89.221	3	1	1	0.4	0.0012597
A0A3B5Z0C7	Ribos_L4_asso_C domain-containing protein OS=Triticum aestivum OX=4565 PE=4 SV=1	---	53.3	44.092	231	21	0	0.952	0.188375
A0A3B5Z0G2	SelT-like protein(predicted) OS=Triticum aestivum OX=4565 PE=4 SV=1	---	6.6	24.648	10	2	2	1.037	0.3012
A0A3B5Z0L3	PRA1 family protein OS=Triticum aestivum OX=4565 PE=3 SV=1	---	6.8	23.094	6	1	1	1.014	0.72162
A0A3B5Z0P6	MYB-related protein(predicted) OS=Triticum aestivum OX=4565 PE=4 SV=1	---	9.5	22.135	9	2	2	0.888	0.102362
A0A3B5Z0S5	NADH dehydrogenase(predicted) OS=Triticum aestivum OX=4565 PE=4 SV=1	---	19.7	7.6229	5	1	1	1.027	0.78452
A0A3B5Z0X4	Metacaspase 3(predicted) OS=Triticum aestivum OX=4565 PE=4 SV=1	---	23.6	45.577	5	7	2	0.642	0.051155
A0A3B5Z109	PlsC domain-containing protein OS=Triticum aestivum OX=4565 PE=4 SV=1	---	3.3	56.243	1	2	1	1.428	0.105864
A0A3B5Z134	TraB domain-containing protein-like isoform X2(predicted) OS=Triticum aestivum OX=4565 PE=4 SV=1	---	15.6	38.452	13	4	4	0.858	0.155497
A0A3B5Z1B0	Protein RNA-directed DNA methylation 3(predicted) OS=Triticum aestivum OX=4565 PE=4 SV=1	---	8.3	165.2	5	11	2	0.716	0.2235
A0A3B5Z1H6	Heat shock 70 kDa protein BIP5(predicted) OS=Triticum aestivum OX=4565 PE=3 SV=1	---	8	21.932	12	1	1	0.715	0.038463
A0A3B5Z1I6	Lipase_GDSL domain-containing protein OS=Triticum aestivum OX=4565 PE=4 SV=1	---	5.2	39.417	3	1	1
A0A3B5Z1J3	Glycosyltransferase OS=Triticum aestivum OX=4565 PE=3 SV=1	---	9.1	50.537	10	4	2	1.544	0.180259
A0A3B5Z1M8	NOT2_3_5 domain-containing protein OS=Triticum aestivum OX=4565 PE=4 SV=1	---	4.1	59.512	6	2	2	0.632	0.0075818
A0A3B5Z1P2	Exocyst subunit Exo70 family protein OS=Triticum aestivum OX=4565 PE=3 SV=1	---	12.3	71.166	12	6	5	0.764	0.063703
A0A3B5Z1P8	NADH-cytochrome b5 reductase OS=Triticum aestivum OX=4565 PE=3 SV=1	---	14	30.972	2	3	1	1.017	0.89614
A0A3B5Z1Q4	Glyco_transf_20 domain-containing protein OS=Triticum aestivum OX=4565 PE=4 SV=1	---	7	101.1	7	5	3	0.343	0.0174846
A0A3B5Z1Q8	Histone domain-containing protein OS=Triticum aestivum OX=4565 PE=3 SV=1	---	14.7	17.568	15	4	2	1.705	0.49526
A0A3B5Z1R9	Endoplasmic reticulum-Golgi intermediate compartment protein 3-like(predicted) OS=Triticum aestivum OX=4565 PE=4 SV=1	---	23.8	43.06	55	9	8	1.079	0.045441
A0A3B5Z1T0	Heat shock protein 101(predicted) OS=Triticum aestivum OX=4565 PE=3 SV=1	---	31.8	101.04	109	23	4	1.323	0.0045646
A0A3B5Z1U8	Lipoyl synthase, mitochondrial(predicted) OS=Triticum aestivum OX=4565 PE=4 SV=1	---	5.3	79.206	11	3	3	1.209	0.82772
A0A3B5Z1V9	Mic1 domain-containing protein OS=Triticum aestivum OX=4565 PE=4 SV=1	---	10.1	80.184	10	5	1	0.914	0.5577
A0A3B5Z274	Transcription elongation factor spt6 OS=Triticum aestivum OX=4565 PE=3 SV=1	---	20.5	175.71	126	28	4	1.363	0.000163919
A0A3B5Z289	Phosphotransferase OS=Triticum aestivum OX=4565 PE=3 SV=1	---	34.1	54.77	115	13	2	0.851	0.132841
A0A3B5Z298	Phosphoglycerate kinase OS=Triticum aestivum OX=4565 PE=3 SV=1	---	16.9	59.087	40	9	1	0.681	0.00021991
A0A3B5Z2A4	Mitochondrial-processing peptidase subunit alpha-like(predicted) OS=Triticum aestivum OX=4565 PE=3 SV=1	---	20.6	53.74	6	7	1	1.154	0.86568
A0A3B5Z2B3	Structural maintenance of chromosomes protein OS=Triticum aestivum OX=4565 PE=3 SV=1	---	13.2	142.22	3	15	1	1.145	0.34632
A0A3B5Z2H3	Signal recognition particle 54 kDa protein OS=Triticum aestivum OX=4565 PE=3 SV=1	---	36.2	54.509	64	16	1	0.726	0.0048969
A0A3B5Z2J5	Usp domain-containing protein OS=Triticum aestivum OX=4565 PE=4 SV=1	---	30.2	28.05	27	5	2	0.933	0.183516
A0A3B5Z2K8	Histone H3 OS=Triticum aestivum OX=4565 PE=3 SV=1	---	60.3	15.296	9	11	2	0.475	0.022603
A0A3B5Z2N0	Histone-lysine N-methyltransferase, H3 lysine-9 specific SUVH1(predicted) OS=Triticum aestivum OX=4565 PE=4 SV=1	---	6.4	74.086	10	3	3	1.641	0.00034313
A0A3B5Z2U0	PMEI domain-containing protein OS=Triticum aestivum OX=4565 PE=4 SV=1	---	9.5	23.147	2	2	2	0.692	0.79852
A0A3B5Z2U2	Putative glycosyl transferase OS=Triticum aestivum OX=4565 PE=4 SV=1	---	8.4	46.389	9	3	3	1.224	0.146096
A0A3B5Z2V9	Vesicle-fusing ATPase(predicted) OS=Triticum aestivum OX=4565 PE=4 SV=1	---	33.8	80.907	96	19	19	0.861	0.0058182
A0A3B5Z2X8	Tr-type G domain-containing protein OS=Triticum aestivum OX=4565 PE=3 SV=1	---	5.2	77.046	4	3	3	2.924	0.020562
A0A3B5Z2Y7	ENTH domain-containing protein OS=Triticum aestivum OX=4565 PE=4 SV=1	---	12	48.238	13	6	6	1.033	0.21438
A0A3B5Z305	ABC transporter domain-containing protein OS=Triticum aestivum OX=4565 PE=4 SV=1	---	1.1	106.48	3	1	1	1.179	0.0839
A0A3B5Z314	ATP-dependent 6-phosphofructokinase OS=Triticum aestivum OX=4565 GN=PFK PE=3 SV=1	PFK	17.5	62.043	6	7	1	1.297	0.129259
A0A3B5Z323	Transcription factor VOZ1(predicted) OS=Triticum aestivum OX=4565 PE=4 SV=1	---	7.3	63.959	8	3	1	0.702	0.21668
A0A3B5Z350	MPN domain-containing protein OS=Triticum aestivum OX=4565 PE=4 SV=1	---	3.2	44.23	2	1	1	0.95	0.80718
A0A3B5Z3A1	WD_REPEATS_REGION domain-containing protein OS=Triticum aestivum OX=4565 PE=4 SV=1	---	8.1	42.952	6	2	2	0.93	0.40702
A0A3B5Z3B8	Putative glutamyl-tRNA synthetase, cytoplasmic(predicted) OS=Triticum aestivum OX=4565 PE=3 SV=1	---	7	81.694	5	5	1	0.539	0.033699
A0A3B5Z3F9	O-acyltransferase WSD1(predicted) OS=Triticum aestivum OX=4565 PE=4 SV=1	---	1.9	51.085	2	1	1	1.379	0.00027518
A0A3B5Z3R5	Nop domain-containing protein OS=Triticum aestivum OX=4565 PE=4 SV=1	---	39.7	61.07	33	19	1	0.435	0.0026827
A0A3B5Z3W9	Complex1_49kDa domain-containing protein OS=Triticum aestivum OX=4565 PE=4 SV=1	---	3.5	40.386	3	1	1	0.611	0.0148399
A0A3B5Z417	Endoglucanase OS=Triticum aestivum OX=4565 PE=3 SV=1	---	6	53.911	2	3	2	1.659	0.26248
A0A3B5Z432	Nop domain-containing protein OS=Triticum aestivum OX=4565 PE=4 SV=1	---	43.8	61.796	1	22	1	1.478	0.0024756
A0A3B5Z4C4	Putative glutamyl-tRNA synthetase, cytoplasmic(predicted) OS=Triticum aestivum OX=4565 PE=3 SV=1	---	10.9	78.557	3	7	1	0.65	0.027898
A0A3B5Z4G0	GTPase Era(predicted) OS=Triticum aestivum OX=4565 PE=3 SV=1	---	11.3	44.388	9	4	4	1.162	0.050776
A0A3B5Z4G1	Interferon-induced guanylate-binding protein 2(predicted) OS=Triticum aestivum OX=4565 PE=4 SV=1	---	16.8	115.92	53	14	1	0.687	0.61632
A0A3B5Z4G2	Aspartic proteinase(predicted) OS=Triticum aestivum OX=4565 PE=3 SV=1	---	38.5	54.343	136	14	13	1.285	0.00081951
A0A3B5Z4L9	Nop domain-containing protein OS=Triticum aestivum OX=4565 PE=4 SV=1	---	13	48.981	18	5	5	1.42	0.182558
A0A3B5Z4Q0	WD_REPEATS_REGION domain-containing protein OS=Triticum aestivum OX=4565 PE=4 SV=1	---	60.9	36.278	74	15	1	0.543	0.0002237
A0A3B5Z4S0	Amidase domain-containing protein OS=Triticum aestivum OX=4565 PE=4 SV=1	---	25	64.955	5	11	1	0.44	0.0126449
A0A3B5Z4T6	DUF1639 family protein(predicted) OS=Triticum aestivum OX=4565 PE=4 SV=1	---	3.1	45.477	4	1	1	1.518	0.042716
A0A3B5Z4X4	Ribosomal L1 domain-containing protein 1(predicted) OS=Triticum aestivum OX=4565 PE=4 SV=1	---	20.6	51.831	57	9	2	0.878	0.41186
A0A3B5Z513	Cas1_AcylT domain-containing protein OS=Triticum aestivum OX=4565 PE=4 SV=1	---	4.5	52.055	8	2	2	0.925	0.44392
A0A3B5Z528	CMP-KDO synthetase1(predicted) OS=Triticum aestivum OX=4565 PE=3 SV=1	---	24.2	32.147	16	4	0	0.595	0.0099609
A0A3B5Z548	Homeobox-DDT domain protein RLT2(predicted) OS=Triticum aestivum OX=4565 PE=4 SV=1	---	4.3	205.48	13	6	4	1.402	0.0152036
A0A3B5Z565	Calcium-dependent protein kinase 3(predicted) OS=Triticum aestivum OX=4565 PE=3 SV=1	---	22.2	52.174	20	10	1	1.086	0.151637
A0A3B5Z580	RING-type domain-containing protein OS=Triticum aestivum OX=4565 PE=4 SV=1	---	11.9	54.464	17	5	5	1.076	0.24844
A0A3B5Z5E4	AAA domain-containing protein OS=Triticum aestivum OX=4565 PE=3 SV=1	---	13.8	57.708	13	7	4	0.855	0.26058
A0A3B5Z5M0	Jasmonoyl--L-amino acid synthetase GH3.5(predicted) OS=Triticum aestivum OX=4565 PE=4 SV=1	---	3.4	68.595	8	2	2	0.729	0.029977
A0A3B5Z5M6	60S ribosomal protein L18a OS=Triticum aestivum OX=4565 PE=3 SV=1	---	37.6	21.254	9	8	3	0.87	0.130343
A0A3B5Z5N6	SAC domain-containing protein OS=Triticum aestivum OX=4565 PE=4 SV=1	---	14.2	65.758	3	6	1	0.17	2.9053e-06
A0A3B5Z5S7	AAA domain-containing protein OS=Triticum aestivum OX=4565 PE=3 SV=1	---	27.3	75.789	2	13	1	1.118	0.48402
A0A3B5Z5T2	PWWP domain-containing protein OS=Triticum aestivum OX=4565 PE=4 SV=1	---	4.8	82.956	11	4	4	1.414	0.122444
A0A3B5Z5X4	H15 domain-containing protein OS=Triticum aestivum OX=4565 PE=4 SV=1	---	7.5	74.944	2	1	1	1.491	0.007759
A0A3B5Z5Y9	H15 domain-containing protein OS=Triticum aestivum OX=4565 PE=4 SV=1	---	11.8	39.633	9	3	3	0.793	0.020922
A0A3B5Z649	Proteasome subunit beta OS=Triticum aestivum OX=4565 PE=3 SV=1	---	36.5	26.079	3	8	1	1.156	0.25912
A0A3B5Z657	Transcriptional repressor NrdR like(predicted) OS=Triticum aestivum OX=4565 PE=4 SV=1	---	4.2	18.272	8	1	1	1.211	0.0160554
A0A3B5Z692	MFS domain-containing protein OS=Triticum aestivum OX=4565 PE=3 SV=1	---	4.4	53.307	7	2	1	0.306	0.030023
A0A3B5Z6A0	Uncharacterized protein OS=Triticum aestivum OX=4565 PE=4 SV=1	---	26.1	29.576	17	5	5	1.251	0.133504
A0A3B5Z6A6	Glucose-1-phosphate adenylyltransferase OS=Triticum aestivum OX=4565 PE=3 SV=1	---	59.6	57.796	178	27	1	0.606	0.00029829
A0A3B5Z6R9	Spliceosome RNA helicase BAT1 isoform 1(predicted) OS=Triticum aestivum OX=4565 PE=4 SV=1	---	26.9	48.721	37	8	3	0.661	0.061624
A0A3B5Z6U0	Translation initiation factor IF-2(predicted) OS=Triticum aestivum OX=4565 PE=4 SV=1	---	14.4	22.618	3	4	1	0.843	0.50984
A0A3B5Z6V8	Protein kinase domain-containing protein OS=Triticum aestivum OX=4565 PE=3 SV=1	---	40.9	44.688	84	15	1	1.421	0.00023655
A0A3B5Z6Z5	Trihelix transcription factor(predicted) OS=Triticum aestivum OX=4565 PE=4 SV=1	---	4.1	50.246	1	1	1	1.051
A0A3B5Z780	H15 domain-containing protein OS=Triticum aestivum OX=4565 PE=4 SV=1	---	5.5	118.26	22	6	3	1.309	0.41604
A0A3B5ZMB6	CNH domain-containing protein OS=Triticum aestivum OX=4565 PE=4 SV=1	---	9.5	103.58	5	6	1	0.779	0.45378
A0A3B5ZMC6	Knot1 domain-containing protein OS=Triticum aestivum OX=4565 PE=3 SV=1	---	17.1	9.0645	7	1	1	1.504	0.0105995
A0A3B5ZMG8	RRM domain-containing protein OS=Triticum aestivum OX=4565 PE=4 SV=1	---	4.2	42.079	6	1	1	0.8	0.065883
A0A3B5ZMN6	OSJNBb0003B01.20 protein(predicted) OS=Triticum aestivum OX=4565 PE=4 SV=1	---	11	41.419	21	4	4	0.95	0.33992
A0A3B5ZMZ6	Protein kinase domain-containing protein OS=Triticum aestivum OX=4565 PE=3 SV=1	---	8.7	44.161	3	3	2	1.734	0.0112209
A0A3B5ZN14	WD_REPEATS_REGION domain-containing protein OS=Triticum aestivum OX=4565 PE=4 SV=1	---	32.9	38.044	23	8	7	1.053	0.5959
A0A3B5ZN38	Nuclear pore complex protein NUP43(predicted) OS=Triticum aestivum OX=4565 PE=4 SV=1	---	3.5	36.364	3	1	1	0.324
A0A3B5ZNB2	TAF domain-containing protein OS=Triticum aestivum OX=4565 PE=4 SV=1	---	6.8	60.347	7	3	3	0.641	0.00123514
A0A3B5ZND4	MAP kinase phosphatase(predicted) OS=Triticum aestivum OX=4565 PE=4 SV=1	---	3.4	78.172	1	2	2	0.387	0.00056327
[truncated: 5,248 more rows]

## Sheet: Table S3
Table S3. Subcellular localization analysis of differentially accumulated proteins (DAPs) identified from extracted nucleus of wheat developing grains under water deficit.
[truncated: 626 more rows]

[truncated: 5 more sheets: Table S4, Table S5, Table S6, Table S7, Table S8]
